# Supplementary material
Source: publisher figshare collection journal article supplement (https://acs.figshare.com/ndownloader/files/3731143)
Supplement: Supplementary file 1 [file 3731143]

data_amg4709
_audit_creation_date              2015-01-18
_audit_creation_method
;
Olex2 1.2-alpha
(compiled 2015.01.16 svn.r3137 for OlexSys, GUI svn.r4992)
;
_shelxl_version_number            2013-4
_publ_contact_author_address      ?
_publ_contact_author_email        ?
_publ_contact_author_name         ''
_publ_contact_author_phone        ?
_publ_section_references
;
Dolomanov, O.V., Bourhis, L.J., Gildea, R.J, Howard, J.A.K. & Puschmann, H.
 (2009), J. Appl. Cryst. 42, 339-341.

Sheldrick, G.M. (2008). Acta Cryst. A64, 112-122.
;
_chemical_name_common             ?
_chemical_name_systematic
;
 ?
;
_chemical_formula_moiety          'C25 H23 N5 O3'
_chemical_formula_sum             'C25 H23 N5 O3'
_chemical_formula_weight          441.48
_chemical_melting_point           ?
loop_
  _atom_type_symbol
  _atom_type_description
  _atom_type_scat_dispersion_real
  _atom_type_scat_dispersion_imag
  _atom_type_scat_source
 'C' 'C' 0.0181 0.0091 'International Tables Vol C Tables 4.2.6.8 and 6.1.1.4'
 'H' 'H' 0.0000 0.0000 'International Tables Vol C Tables 4.2.6.8 and 6.1.1.4'
 'N' 'N' 0.0311 0.0180 'International Tables Vol C Tables 4.2.6.8 and 6.1.1.4'
 'O' 'O' 0.0492 0.0322 'International Tables Vol C Tables 4.2.6.8 and 6.1.1.4'

_shelx_space_group_comment
;
The symmetry employed for this shelxl refinement is uniquely defined
by the following loop, which should always be used as a source of
symmetry information in preference to the above space-group names.
They are only intended as comments.
;
_space_group_crystal_system       'monoclinic'
_space_group_IT_number            14
_space_group_name_H-M_alt         'P 1 21/c 1'
_space_group_name_Hall            '-P 2ybc'
loop_
  _space_group_symop_operation_xyz
 'x, y, z'
 '-x, y+1/2, -z+1/2'
 '-x, -y, -z'
 'x, -y-1/2, z-1/2'

_cell_length_a                    18.0735(13)
_cell_length_b                    12.3153(12)
_cell_length_c                    9.8022(8)
_cell_angle_alpha                 90
_cell_angle_beta                  91.823(5)
_cell_angle_gamma                 90
_cell_volume                      2180.7(3)
_cell_formula_units_Z             4
_cell_measurement_reflns_used     ?
_cell_measurement_temperature     173(2)
_cell_measurement_theta_max       ?
_cell_measurement_theta_min       ?
_shelx_estimated_absorpt_T_max    0.982
_shelx_estimated_absorpt_T_min    0.797
_exptl_absorpt_coefficient_mu     0.741
_exptl_absorpt_correction_T_max   0.9824
_exptl_absorpt_correction_T_min   0.7974
_exptl_absorpt_correction_type    multi-scan
_exptl_absorpt_process_details    Sadabs
_exptl_crystal_colour             colourless
_exptl_crystal_colour_primary     colourless
_exptl_crystal_density_diffrn     1.345
_exptl_crystal_density_meas       ?
_exptl_crystal_density_method     ?
_exptl_crystal_description        plate
_exptl_crystal_F_000              928
_exptl_crystal_recrystallization_method 'used as recieved'
_exptl_crystal_size_max           0.32
_exptl_crystal_size_mid           0.136
_exptl_crystal_size_min           0.024
_exptl_special_details
;
Data was collected using a BRUKER CCD (charge coupled device) based
diffractometer equipped with an Oxford low-temperature apparatus operating at
173 K.  A suitable crystal was chosen and mounted on a nylon loop using 
Paratone oil.  Data  were measured using omega and phi scans of 1.0\% per frame 
for 30 s. The total number of images were based on 
results from the program COSMO where redundancy was expected to be 4 and 
completeness to 0.83\%A to 100%. Cell parameters were
retrieved using APEX II software and refined using SAINT on all observed
reflections.Data reduction was performed using the SAINT software which 
corrects for Lp. Scaling and absorption corrections were applied using SADABS6 
multi-scan technique, supplied by George Sheldrick.  The structures are solved 
by the direct method using the SHELXS-97 program and refined by least squares 
method on F2, SHELXL-97, incorporated in OLEX2. 
;
_exptl_transmission_factor_max    ?
_exptl_transmission_factor_min    ?
_diffrn_reflns_av_R_equivalents   0.0515
_diffrn_reflns_av_unetI/netI      0.0521
_diffrn_reflns_Laue_measured_fraction_full 0.995
_diffrn_reflns_Laue_measured_fraction_max 0.994
_diffrn_reflns_limit_h_max        21
_diffrn_reflns_limit_h_min        -20
_diffrn_reflns_limit_k_max        14
_diffrn_reflns_limit_k_min        -13
_diffrn_reflns_limit_l_max        11
_diffrn_reflns_limit_l_min        -11
_diffrn_reflns_number             13927
_diffrn_reflns_point_group_measured_fraction_full 0.995
_diffrn_reflns_point_group_measured_fraction_max 0.994
_diffrn_reflns_theta_full         67.679
_diffrn_reflns_theta_max          68.274
_diffrn_reflns_theta_min          2.446
_diffrn_ambient_temperature       173(2)
_diffrn_detector_area_resol_mean  836.6
_diffrn_measured_fraction_theta_full 0.995
_diffrn_measured_fraction_theta_max 0.994
_diffrn_measurement_device_type   'Bruker APEX-II CCD'
_diffrn_measurement_method        '\w and \f'
_diffrn_radiation_monochromator   graphite
_diffrn_radiation_type            CuK\a
_diffrn_radiation_wavelength      1.54178
_diffrn_source                    'sealed tube'
_diffrn_special_details           ?
_diffrn_standards_interval_count  .
_diffrn_standards_interval_time   .
_diffrn_standards_number          .
_reflns_Friedel_coverage          0.000
_reflns_Friedel_fraction_full     .
_reflns_Friedel_fraction_max      .
_reflns_number_gt                 2930
_reflns_number_total              3963
_reflns_special_details
;
 Reflections were merged by SHELXL according to the crystal
 class for the calculation of statistics and refinement.
 
 _reflns_Friedel_fraction is defined as the number of unique
 Friedel pairs measured divided by the number that would be
 possible theoretically, ignoring centric projections and
 systematic absences.
;
_reflns_threshold_expression      'I > 2\s(I)'
_computing_cell_refinement        'APEX2 (BRUKER, V2012.10-0, 2012)'
_computing_data_collection        'COSMO (BRUKER, V1.61, 2009)'
_computing_data_reduction         ?
_computing_molecular_graphics     'Olex2 (Dolomanov et al., 2009)'
_computing_publication_material   'Olex2 (Dolomanov et al., 2009)'
_computing_structure_refinement   'XL (Sheldrick, 2008)'
_computing_structure_solution     'ShelXS (Sheldrick, 2008)'
_refine_diff_density_max          0.187
_refine_diff_density_min          -0.227
_refine_diff_density_rms          0.049
_refine_ls_extinction_coef        .
_refine_ls_extinction_method      none
_refine_ls_goodness_of_fit_ref    1.023
_refine_ls_hydrogen_treatment     constr
_refine_ls_matrix_type            full
_refine_ls_number_parameters      299
_refine_ls_number_reflns          3963
_refine_ls_number_restraints      0
_refine_ls_R_factor_all           0.0653
_refine_ls_R_factor_gt            0.0454
_refine_ls_restrained_S_all       1.023
_refine_ls_shift/su_max           0.001
_refine_ls_shift/su_mean          0.000
_refine_ls_structure_factor_coef  Fsqd
_refine_ls_weighting_details
'w=1/[\s^2^(Fo^2^)+(0.0667P)^2^] where P=(Fo^2^+2Fc^2^)/3'
_refine_ls_weighting_scheme       calc
_refine_ls_wR_factor_gt           0.1136
_refine_ls_wR_factor_ref          0.1259
_refine_special_details
;
Structure refined by least squares method on F2, SHELXL-97, 
incorporated in Olex2 (Dolomanov et al., 2009). 
All H atoms were placed in calculated positions and refined using a riding
model.
;
_olex2_refinement_description
;
1. Fixed Uiso
 At 1.2 times of:
  All C(H) groups, All C(H,H) groups, All N(H) groups
 At 1.5 times of:
  All C(H,H,H) groups
2.a Ternary CH refined with riding coordinates:
 C19(H19)
2.b Secondary CH2 refined with riding coordinates:
 C20(H20A,H20B), C21(H21A,H21B), C22(H22A,H22B), C23(H23A,H23B)
2.c Aromatic/amide H refined with riding coordinates:
 N1(H1), C2(H2), C3(H3), C5(H5), C6(H6), C10(H10), C11(H11), C12(H12),
 C13(H13), C17(H17), C18(H18)
2.d Idealised Me refined as rotating group:
 C25(H25A,H25B,H25C)
;
_atom_sites_solution_hydrogens    geom
_atom_sites_solution_primary      direct
_atom_sites_solution_secondary    ?
loop_
  _atom_site_label
  _atom_site_type_symbol
  _atom_site_fract_x
  _atom_site_fract_y
  _atom_site_fract_z
  _atom_site_U_iso_or_equiv
  _atom_site_adp_type
  _atom_site_occupancy
  _atom_site_site_symmetry_order
  _atom_site_calc_flag
  _atom_site_refinement_flags_posn
  _atom_site_refinement_flags_adp
  _atom_site_refinement_flags_occupancy
  _atom_site_disorder_assembly
  _atom_site_disorder_group
 O1 O 0.90040(7) 0.76721(12) 0.82222(14) 0.0382(3) Uani 1 1 d . . . . .
 O2 O 1.14555(7) 0.91089(11) 0.41662(13) 0.0363(3) Uani 1 1 d . . . . .
 O3 O 0.57537(10) 0.54866(17) 1.14509(17) 0.0630(5) Uani 1 1 d . . . . .
 N1 N 1.24768(8) 0.74962(14) 0.37120(14) 0.0303(3) Uani 1 1 d . . . . .
 H1 H 1.2372 0.7838 0.2942 0.036 Uiso 1 1 calc R . . . .
 N2 N 1.23907(8) 0.69729(14) 0.58857(14) 0.0308(4) Uani 1 1 d . . . . .
 N3 N 0.92379(9) 0.91621(15) 0.96186(16) 0.0370(4) Uani 1 1 d . . . . .
 N4 N 0.78552(9) 0.88507(16) 1.07358(17) 0.0399(4) Uani 1 1 d . . . . .
 N5 N 0.62236(9) 0.60711(15) 0.94740(17) 0.0386(4) Uani 1 1 d . . . . .
 C1 C 0.96360(10) 0.78896(17) 0.75028(18) 0.0322(4) Uani 1 1 d . . . . .
 C2 C 1.01306(10) 0.70459(17) 0.73795(19) 0.0337(4) Uani 1 1 d . . . . .
 H2 H 1.0050 0.6379 0.7838 0.040 Uiso 1 1 calc R . . . .
 C3 C 1.07466(10) 0.71717(16) 0.65858(18) 0.0322(4) Uani 1 1 d . . . . .
 H3 H 1.1083 0.6586 0.6486 0.039 Uiso 1 1 calc R . . . .
 C4 C 1.08719(10) 0.81588(16) 0.59342(17) 0.0296(4) Uani 1 1 d . . . . .
 C5 C 1.03633(10) 0.90020(16) 0.60921(18) 0.0332(4) Uani 1 1 d . . . . .
 H5 H 1.0450 0.9680 0.5664 0.040 Uiso 1 1 calc R . . . .
 C6 C 0.97413(11) 0.88764(17) 0.68511(19) 0.0348(4) Uani 1 1 d . . . . .
 H6 H 0.9393 0.9449 0.6927 0.042 Uiso 1 1 calc R . . . .
 C7 C 1.14717(10) 0.83420(16) 0.49596(17) 0.0290(4) Uani 1 1 d . . . . .
 C8 C 1.21021(10) 0.75771(16) 0.48903(17) 0.0282(4) Uani 1 1 d . . . . .
 C9 C 1.30475(10) 0.67835(16) 0.39492(18) 0.0303(4) Uani 1 1 d . . . . .
 C10 C 1.35899(10) 0.63777(19) 0.31075(19) 0.0379(5) Uani 1 1 d . . . . .
 H10 H 1.3617 0.6590 0.2179 0.045 Uiso 1 1 calc R . . . .
 C11 C 1.40853(11) 0.56523(19) 0.3695(2) 0.0418(5) Uani 1 1 d . . . . .
 H11 H 1.4463 0.5353 0.3157 0.050 Uiso 1 1 calc R . . . .
 C12 C 1.40454(11) 0.53436(19) 0.5076(2) 0.0421(5) Uani 1 1 d . . . . .
 H12 H 1.4400 0.4844 0.5443 0.051 Uiso 1 1 calc R . . . .
 C13 C 1.35103(10) 0.57415(17) 0.59082(19) 0.0367(4) Uani 1 1 d . . . . .
 H13 H 1.3490 0.5532 0.6839 0.044 Uiso 1 1 calc R . . . .
 C14 C 1.29963(10) 0.64700(16) 0.53238(18) 0.0304(4) Uani 1 1 d . . . . .
 C15 C 0.87811(10) 0.83919(17) 0.91999(18) 0.0321(4) Uani 1 1 d . . . . .
 C16 C 0.80763(11) 0.82198(17) 0.97216(18) 0.0338(4) Uani 1 1 d . . . . .
 C17 C 0.89952(11) 0.98017(18) 1.06234(19) 0.0386(5) Uani 1 1 d . . . . .
 H17 H 0.9299 1.0380 1.0956 0.046 Uiso 1 1 calc R . . . .
 C18 C 0.83163(12) 0.96333(19) 1.1177(2) 0.0406(5) Uani 1 1 d . . . . .
 H18 H 0.8169 1.0090 1.1900 0.049 Uiso 1 1 calc R . . . .
 C19 C 0.75590(10) 0.73513(17) 0.91968(19) 0.0354(4) Uani 1 1 d . . . . .
 H19 H 0.7759 0.7057 0.8332 0.042 Uiso 1 1 calc R . . . .
 C20 C 0.67822(11) 0.78048(17) 0.88774(19) 0.0368(4) Uani 1 1 d . . . . .
 H20A H 0.6590 0.8154 0.9704 0.044 Uiso 1 1 calc R . . . .
 H20B H 0.6809 0.8364 0.8155 0.044 Uiso 1 1 calc R . . . .
 C21 C 0.62579(11) 0.69050(19) 0.8406(2) 0.0417(5) Uani 1 1 d . . . . .
 H21A H 0.5758 0.7208 0.8216 0.050 Uiso 1 1 calc R . . . .
 H21B H 0.6435 0.6577 0.7554 0.050 Uiso 1 1 calc R . . . .
 C22 C 0.75144(11) 0.64118(17) 1.0228(2) 0.0388(5) Uani 1 1 d . . . . .
 H22A H 0.8006 0.6062 1.0335 0.047 Uiso 1 1 calc R . . . .
 H22B H 0.7381 0.6705 1.1128 0.047 Uiso 1 1 calc R . . . .
 C23 C 0.69434(12) 0.55638(18) 0.9769(2) 0.0443(5) Uani 1 1 d . . . . .
 H23A H 0.7114 0.5192 0.8941 0.053 Uiso 1 1 calc R . . . .
 H23B H 0.6893 0.5012 1.0495 0.053 Uiso 1 1 calc R . . . .
 C24 C 0.56950(12) 0.6039(2) 1.0411(2) 0.0439(5) Uani 1 1 d . . . . .
 C25 C 0.50033(13) 0.6702(3) 1.0135(3) 0.0653(8) Uani 1 1 d . . . . .
 H25A H 0.4645 0.6552 1.0842 0.098 Uiso 1 1 calc GR . . . .
 H25B H 0.4786 0.6507 0.9239 0.098 Uiso 1 1 calc GR . . . .
 H25C H 0.5129 0.7476 1.0145 0.098 Uiso 1 1 calc GR . . . .

loop_
  _atom_site_aniso_label
  _atom_site_aniso_U_11
  _atom_site_aniso_U_22
  _atom_site_aniso_U_33
  _atom_site_aniso_U_23
  _atom_site_aniso_U_13
  _atom_site_aniso_U_12
 O1 0.0293(7) 0.0413(8) 0.0449(7) -0.0067(7) 0.0130(6) -0.0037(6)
 O2 0.0388(7) 0.0339(7) 0.0366(7) 0.0048(6) 0.0076(5) 0.0021(6)
 O3 0.0566(10) 0.0832(14) 0.0497(9) 0.0259(10) 0.0061(7) -0.0066(10)
 N1 0.0287(7) 0.0402(9) 0.0223(7) 0.0013(7) 0.0031(5) 0.0037(7)
 N2 0.0270(7) 0.0398(9) 0.0258(7) -0.0005(7) 0.0032(6) 0.0023(7)
 N3 0.0331(8) 0.0434(10) 0.0348(8) -0.0022(8) 0.0039(6) -0.0041(8)
 N4 0.0372(9) 0.0467(10) 0.0361(8) -0.0066(8) 0.0079(7) -0.0009(8)
 N5 0.0335(8) 0.0426(10) 0.0398(8) 0.0044(8) 0.0025(7) -0.0050(7)
 C1 0.0269(9) 0.0393(11) 0.0307(8) -0.0060(8) 0.0040(7) -0.0021(8)
 C2 0.0341(10) 0.0323(10) 0.0350(9) 0.0005(8) 0.0053(7) 0.0000(8)
 C3 0.0306(9) 0.0322(10) 0.0339(9) -0.0014(8) 0.0044(7) 0.0038(8)
 C4 0.0271(8) 0.0356(10) 0.0262(8) -0.0022(8) 0.0011(7) 0.0026(8)
 C5 0.0363(10) 0.0323(10) 0.0313(9) 0.0011(8) 0.0032(7) 0.0036(8)
 C6 0.0318(9) 0.0377(11) 0.0351(9) -0.0022(8) 0.0041(7) 0.0072(8)
 C7 0.0300(9) 0.0327(10) 0.0242(8) -0.0038(8) 0.0014(7) -0.0005(8)
 C8 0.0281(8) 0.0334(10) 0.0235(8) -0.0021(7) 0.0047(6) -0.0010(8)
 C9 0.0266(9) 0.0373(10) 0.0272(8) -0.0021(8) 0.0031(7) 0.0002(8)
 C10 0.0310(9) 0.0520(13) 0.0311(9) -0.0034(9) 0.0067(7) 0.0005(9)
 C11 0.0305(9) 0.0511(13) 0.0445(10) -0.0043(10) 0.0094(8) 0.0047(9)
 C12 0.0299(9) 0.0467(12) 0.0498(11) 0.0049(10) 0.0029(8) 0.0056(9)
 C13 0.0299(9) 0.0446(12) 0.0357(9) 0.0082(9) 0.0026(7) 0.0006(9)
 C14 0.0267(9) 0.0366(10) 0.0279(8) -0.0009(8) 0.0033(7) 0.0005(8)
 C15 0.0288(9) 0.0378(10) 0.0299(8) 0.0020(8) 0.0044(7) 0.0018(8)
 C16 0.0320(9) 0.0382(11) 0.0315(9) 0.0013(8) 0.0051(7) 0.0010(8)
 C17 0.0390(10) 0.0411(11) 0.0359(9) -0.0030(9) 0.0006(8) -0.0041(9)
 C18 0.0411(11) 0.0456(12) 0.0356(9) -0.0080(9) 0.0057(8) 0.0005(10)
 C19 0.0316(9) 0.0428(11) 0.0322(9) -0.0056(9) 0.0088(7) -0.0019(9)
 C20 0.0345(10) 0.0426(12) 0.0334(9) 0.0077(9) 0.0034(7) -0.0026(9)
 C21 0.0355(10) 0.0542(13) 0.0354(9) 0.0073(10) -0.0001(8) -0.0055(10)
 C22 0.0330(10) 0.0371(11) 0.0462(11) -0.0007(9) 0.0008(8) 0.0035(9)
 C23 0.0380(11) 0.0387(12) 0.0562(12) 0.0000(10) 0.0009(9) -0.0007(9)
 C24 0.0370(11) 0.0528(13) 0.0422(11) 0.0069(11) 0.0040(8) -0.0062(10)
 C25 0.0392(12) 0.087(2) 0.0708(16) 0.0155(16) 0.0189(11) 0.0088(13)

_geom_special_details
;
 All esds (except the esd in the dihedral angle between two l.s. planes)
 are estimated using the full covariance matrix.  The cell esds are taken
 into account individually in the estimation of esds in distances, angles
 and torsion angles; correlations between esds in cell parameters are only
 used when they are defined by crystal symmetry.  An approximate (isotropic)
 treatment of cell esds is used for estimating esds involving l.s. planes.
;
loop_
  _geom_bond_atom_site_label_1
  _geom_bond_atom_site_label_2
  _geom_bond_distance
  _geom_bond_site_symmetry_2
  _geom_bond_publ_flag
 O1 C1 1.387(2) . ?
 O1 C15 1.375(2) . ?
 O2 C7 1.223(2) . ?
 O3 C24 1.228(3) . ?
 N1 H1 0.8800 . ?
 N1 C8 1.361(2) . ?
 N1 C9 1.369(2) . ?
 N2 C8 1.321(2) . ?
 N2 C14 1.387(2) . ?
 N3 C15 1.315(3) . ?
 N3 C17 1.346(3) . ?
 N4 C16 1.333(3) . ?
 N4 C18 1.337(3) . ?
 N5 C21 1.469(3) . ?
 N5 C23 1.464(3) . ?
 N5 C24 1.347(3) . ?
 C1 C2 1.379(3) . ?
 C1 C6 1.389(3) . ?
 C2 H2 0.9500 . ?
 C2 C3 1.387(3) . ?
 C3 H3 0.9500 . ?
 C3 C4 1.395(3) . ?
 C4 C5 1.399(3) . ?
 C4 C7 1.485(2) . ?
 C5 H5 0.9500 . ?
 C5 C6 1.376(3) . ?
 C6 H6 0.9500 . ?
 C7 C8 1.482(3) . ?
 C9 C10 1.394(3) . ?
 C9 C14 1.407(2) . ?
 C10 H10 0.9500 . ?
 C10 C11 1.378(3) . ?
 C11 H11 0.9500 . ?
 C11 C12 1.410(3) . ?
 C12 H12 0.9500 . ?
 C12 C13 1.375(3) . ?
 C13 H13 0.9500 . ?
 C13 C14 1.401(3) . ?
 C15 C16 1.404(3) . ?
 C16 C19 1.501(3) . ?
 C17 H17 0.9500 . ?
 C17 C18 1.373(3) . ?
 C18 H18 0.9500 . ?
 C19 H19 1.0000 . ?
 C19 C20 1.534(3) . ?
 C19 C22 1.540(3) . ?
 C20 H20A 0.9900 . ?
 C20 H20B 0.9900 . ?
 C20 C21 1.520(3) . ?
 C21 H21A 0.9900 . ?
 C21 H21B 0.9900 . ?
 C22 H22A 0.9900 . ?
 C22 H22B 0.9900 . ?
 C22 C23 1.526(3) . ?
 C23 H23A 0.9900 . ?
 C23 H23B 0.9900 . ?
 C24 C25 1.510(3) . ?
 C25 H25A 0.9800 . ?
 C25 H25B 0.9800 . ?
 C25 H25C 0.9800 . ?

loop_
  _geom_angle_atom_site_label_1
  _geom_angle_atom_site_label_2
  _geom_angle_atom_site_label_3
  _geom_angle
  _geom_angle_site_symmetry_1
  _geom_angle_site_symmetry_3
  _geom_angle_publ_flag
 C15 O1 C1 119.60(15) . . ?
 C8 N1 H1 126.4 . . ?
 C8 N1 C9 107.18(15) . . ?
 C9 N1 H1 126.4 . . ?
 C8 N2 C14 104.85(15) . . ?
 C15 N3 C17 115.77(17) . . ?
 C16 N4 C18 117.56(17) . . ?
 C23 N5 C21 112.44(17) . . ?
 C24 N5 C21 123.59(18) . . ?
 C24 N5 C23 119.89(18) . . ?
 O1 C1 C6 121.99(17) . . ?
 C2 C1 O1 116.47(18) . . ?
 C2 C1 C6 121.36(17) . . ?
 C1 C2 H2 120.0 . . ?
 C1 C2 C3 119.95(18) . . ?
 C3 C2 H2 120.0 . . ?
 C2 C3 H3 120.0 . . ?
 C2 C3 C4 119.94(17) . . ?
 C4 C3 H3 120.0 . . ?
 C3 C4 C5 118.65(17) . . ?
 C3 C4 C7 124.02(17) . . ?
 C5 C4 C7 117.02(17) . . ?
 C4 C5 H5 119.1 . . ?
 C6 C5 C4 121.83(18) . . ?
 C6 C5 H5 119.1 . . ?
 C1 C6 H6 120.9 . . ?
 C5 C6 C1 118.24(18) . . ?
 C5 C6 H6 120.9 . . ?
 O2 C7 C4 121.55(17) . . ?
 O2 C7 C8 117.69(16) . . ?
 C8 C7 C4 120.74(16) . . ?
 N1 C8 C7 119.31(16) . . ?
 N2 C8 N1 112.96(16) . . ?
 N2 C8 C7 127.62(15) . . ?
 N1 C9 C10 132.05(17) . . ?
 N1 C9 C14 105.45(15) . . ?
 C10 C9 C14 122.49(18) . . ?
 C9 C10 H10 121.8 . . ?
 C11 C10 C9 116.40(18) . . ?
 C11 C10 H10 121.8 . . ?
 C10 C11 H11 119.2 . . ?
 C10 C11 C12 121.59(18) . . ?
 C12 C11 H11 119.2 . . ?
 C11 C12 H12 118.9 . . ?
 C13 C12 C11 122.13(19) . . ?
 C13 C12 H12 118.9 . . ?
 C12 C13 H13 121.5 . . ?
 C12 C13 C14 117.09(18) . . ?
 C14 C13 H13 121.5 . . ?
 N2 C14 C9 109.54(16) . . ?
 N2 C14 C13 130.17(17) . . ?
 C13 C14 C9 120.28(17) . . ?
 O1 C15 C16 116.48(17) . . ?
 N3 C15 O1 119.19(16) . . ?
 N3 C15 C16 124.29(18) . . ?
 N4 C16 C15 118.74(18) . . ?
 N4 C16 C19 118.21(17) . . ?
 C15 C16 C19 123.05(17) . . ?
 N3 C17 H17 119.4 . . ?
 N3 C17 C18 121.1(2) . . ?
 C18 C17 H17 119.4 . . ?
 N4 C18 C17 122.46(19) . . ?
 N4 C18 H18 118.8 . . ?
 C17 C18 H18 118.8 . . ?
 C16 C19 H19 108.2 . . ?
 C16 C19 C20 111.51(17) . . ?
 C16 C19 C22 110.82(16) . . ?
 C20 C19 H19 108.2 . . ?
 C20 C19 C22 109.92(16) . . ?
 C22 C19 H19 108.2 . . ?
 C19 C20 H20A 109.5 . . ?
 C19 C20 H20B 109.5 . . ?
 H20A C20 H20B 108.1 . . ?
 C21 C20 C19 110.75(18) . . ?
 C21 C20 H20A 109.5 . . ?
 C21 C20 H20B 109.5 . . ?
 N5 C21 C20 109.43(16) . . ?
 N5 C21 H21A 109.8 . . ?
 N5 C21 H21B 109.8 . . ?
 C20 C21 H21A 109.8 . . ?
 C20 C21 H21B 109.8 . . ?
 H21A C21 H21B 108.2 . . ?
 C19 C22 H22A 109.3 . . ?
 C19 C22 H22B 109.3 . . ?
 H22A C22 H22B 107.9 . . ?
 C23 C22 C19 111.67(17) . . ?
 C23 C22 H22A 109.3 . . ?
 C23 C22 H22B 109.3 . . ?
 N5 C23 C22 110.77(18) . . ?
 N5 C23 H23A 109.5 . . ?
 N5 C23 H23B 109.5 . . ?
 C22 C23 H23A 109.5 . . ?
 C22 C23 H23B 109.5 . . ?
 H23A C23 H23B 108.1 . . ?
 O3 C24 N5 122.6(2) . . ?
 O3 C24 C25 119.8(2) . . ?
 N5 C24 C25 117.61(19) . . ?
 C24 C25 H25A 109.5 . . ?
 C24 C25 H25B 109.5 . . ?
 C24 C25 H25C 109.5 . . ?
 H25A C25 H25B 109.5 . . ?
 H25A C25 H25C 109.5 . . ?
 H25B C25 H25C 109.5 . . ?

loop_
  _geom_hbond_atom_site_label_D
  _geom_hbond_atom_site_label_H
  _geom_hbond_atom_site_label_A
  _geom_hbond_distance_DH
  _geom_hbond_distance_HA
  _geom_hbond_distance_DA
  _geom_hbond_angle_DHA
  _geom_hbond_site_symmetry_A
 N1 H1 N2 0.88 2.03 2.846(2) 153.7 4_575

loop_
  _geom_torsion_atom_site_label_1
  _geom_torsion_atom_site_label_2
  _geom_torsion_atom_site_label_3
  _geom_torsion_atom_site_label_4
  _geom_torsion
  _geom_torsion_site_symmetry_1
  _geom_torsion_site_symmetry_2
  _geom_torsion_site_symmetry_3
  _geom_torsion_site_symmetry_4
  _geom_torsion_publ_flag
 O1 C1 C2 C3 174.94(16) . . . . ?
 O1 C1 C6 C5 -176.19(17) . . . . ?
 O1 C15 C16 N4 175.55(18) . . . . ?
 O1 C15 C16 C19 -4.0(3) . . . . ?
 O2 C7 C8 N1 -23.5(3) . . . . ?
 O2 C7 C8 N2 152.42(19) . . . . ?
 N1 C9 C10 C11 -179.6(2) . . . . ?
 N1 C9 C14 N2 1.4(2) . . . . ?
 N1 C9 C14 C13 -179.40(18) . . . . ?
 N3 C15 C16 N4 -2.1(3) . . . . ?
 N3 C15 C16 C19 178.33(19) . . . . ?
 N3 C17 C18 N4 -1.5(3) . . . . ?
 N4 C16 C19 C20 50.0(2) . . . . ?
 N4 C16 C19 C22 -72.8(2) . . . . ?
 C1 O1 C15 N3 -12.7(3) . . . . ?
 C1 O1 C15 C16 169.54(17) . . . . ?
 C1 C2 C3 C4 1.2(3) . . . . ?
 C2 C1 C6 C5 -1.2(3) . . . . ?
 C2 C3 C4 C5 -0.5(3) . . . . ?
 C2 C3 C4 C7 -173.87(17) . . . . ?
 C3 C4 C5 C6 -1.0(3) . . . . ?
 C3 C4 C7 O2 161.60(18) . . . . ?
 C3 C4 C7 C8 -16.6(3) . . . . ?
 C4 C5 C6 C1 1.9(3) . . . . ?
 C4 C7 C8 N1 154.75(16) . . . . ?
 C4 C7 C8 N2 -29.3(3) . . . . ?
 C5 C4 C7 O2 -11.8(3) . . . . ?
 C5 C4 C7 C8 169.98(16) . . . . ?
 C6 C1 C2 C3 -0.3(3) . . . . ?
 C7 C4 C5 C6 172.77(17) . . . . ?
 C8 N1 C9 C10 178.0(2) . . . . ?
 C8 N1 C9 C14 -1.1(2) . . . . ?
 C8 N2 C14 C9 -1.1(2) . . . . ?
 C8 N2 C14 C13 179.8(2) . . . . ?
 C9 N1 C8 N2 0.5(2) . . . . ?
 C9 N1 C8 C7 176.95(16) . . . . ?
 C9 C10 C11 C12 -0.3(3) . . . . ?
 C10 C9 C14 N2 -177.85(18) . . . . ?
 C10 C9 C14 C13 1.4(3) . . . . ?
 C10 C11 C12 C13 0.4(4) . . . . ?
 C11 C12 C13 C14 0.4(3) . . . . ?
 C12 C13 C14 N2 177.8(2) . . . . ?
 C12 C13 C14 C9 -1.2(3) . . . . ?
 C14 N2 C8 N1 0.4(2) . . . . ?
 C14 N2 C8 C7 -175.73(18) . . . . ?
 C14 C9 C10 C11 -0.6(3) . . . . ?
 C15 O1 C1 C2 133.12(18) . . . . ?
 C15 O1 C1 C6 -51.6(2) . . . . ?
 C15 N3 C17 C18 1.1(3) . . . . ?
 C15 C16 C19 C20 -130.46(19) . . . . ?
 C15 C16 C19 C22 106.7(2) . . . . ?
 C16 N4 C18 C17 0.1(3) . . . . ?
 C16 C19 C20 C21 -177.56(15) . . . . ?
 C16 C19 C22 C23 175.30(16) . . . . ?
 C17 N3 C15 O1 -176.87(18) . . . . ?
 C17 N3 C15 C16 0.7(3) . . . . ?
 C18 N4 C16 C15 1.6(3) . . . . ?
 C18 N4 C16 C19 -178.85(19) . . . . ?
 C19 C20 C21 N5 58.7(2) . . . . ?
 C19 C22 C23 N5 -53.5(2) . . . . ?
 C20 C19 C22 C23 51.6(2) . . . . ?
 C21 N5 C23 C22 58.9(2) . . . . ?
 C21 N5 C24 O3 -164.6(2) . . . . ?
 C21 N5 C24 C25 16.4(3) . . . . ?
 C22 C19 C20 C21 -54.2(2) . . . . ?
 C23 N5 C21 C20 -61.4(2) . . . . ?
 C23 N5 C24 O3 -9.1(3) . . . . ?
 C23 N5 C24 C25 171.9(2) . . . . ?
 C24 N5 C21 C20 95.8(2) . . . . ?
 C24 N5 C23 C22 -99.2(2) . . . . ?

_iucr_refine_instructions_details
;
TITL amg4709 in P2(1)/c
CELL 1.54178 18.0735 12.3153 9.8022 90 91.823 90
ZERR 4 0.0013 0.0012 0.0008 0 0.005 0
LATT 1
SYMM -X,0.5+Y,0.5-Z
SFAC C H N O
UNIT 100 92 20 12
EQIV $1 +X,1.5-Y,-0.5+Z
 
L.S. 4
PLAN  5
SIZE 0.024 0.136 0.32
TEMP -100(2)
HTAB N1 N2_$1
BOND $H
HTAB
CONF
WPDB -1
MORE -1
fmap 2
acta
REM <olex2.extras>
REM <HklSrc "%.\\amg4709.hkl">
REM </olex2.extras>
 
WGHT    0.066700
FVAR       0.12299
O1    4    0.900400    0.767210    0.822224    11.00000    0.02932    0.04131 =
         0.04488   -0.00674    0.01301   -0.00370
O2    4    1.145552    0.910890    0.416618    11.00000    0.03880    0.03393 =
         0.03655    0.00479    0.00761    0.00212
O3    4    0.575366    0.548663    1.145095    11.00000    0.05660    0.08317 =
         0.04965    0.02586    0.00606   -0.00656
N1    3    1.247682    0.749622    0.371199    11.00000    0.02868    0.04020 =
         0.02231    0.00126    0.00315    0.00369
AFIX  43
H1    2    1.237182    0.783825    0.294171    11.00000   -1.20000
AFIX   0
N2    3    1.239071    0.697289    0.588573    11.00000    0.02705    0.03981 =
         0.02579   -0.00048    0.00324    0.00234
N3    3    0.923788    0.916211    0.961857    11.00000    0.03305    0.04340 =
         0.03479   -0.00216    0.00387   -0.00410
N4    3    0.785518    0.885066    1.073585    11.00000    0.03720    0.04674 =
         0.03609   -0.00661    0.00793   -0.00095
N5    3    0.622364    0.607111    0.947398    11.00000    0.03347    0.04258 =
         0.03982    0.00435    0.00246   -0.00501
C1    1    0.963596    0.788958    0.750285    11.00000    0.02692    0.03928 =
         0.03072   -0.00597    0.00401   -0.00215
C2    1    1.013058    0.704586    0.737953    11.00000    0.03409    0.03226 =
         0.03502    0.00052    0.00527    0.00004
AFIX  43
H2    2    1.004961    0.637870    0.783784    11.00000   -1.20000
AFIX   0
C3    1    1.074661    0.717172    0.658575    11.00000    0.03065    0.03221 =
         0.03393   -0.00137    0.00444    0.00381
AFIX  43
H3    2    1.108287    0.658629    0.648595    11.00000   -1.20000
AFIX   0
C4    1    1.087189    0.815880    0.593415    11.00000    0.02705    0.03561 =
         0.02625   -0.00217    0.00108    0.00260
C5    1    1.036327    0.900199    0.609212    11.00000    0.03628    0.03229 =
         0.03125    0.00115    0.00318    0.00359
AFIX  43
H5    2    1.044952    0.968021    0.566365    11.00000   -1.20000
AFIX   0
C6    1    0.974126    0.887637    0.685114    11.00000    0.03176    0.03774 =
         0.03513   -0.00220    0.00415    0.00723
AFIX  43
H6    2    0.939318    0.944949    0.692721    11.00000   -1.20000
AFIX   0
C7    1    1.147171    0.834203    0.495958    11.00000    0.03004    0.03273 =
         0.02424   -0.00376    0.00141   -0.00046
C8    1    1.210208    0.757708    0.489033    11.00000    0.02808    0.03337 =
         0.02350   -0.00213    0.00474   -0.00101
C9    1    1.304751    0.678346    0.394919    11.00000    0.02660    0.03729 =
         0.02724   -0.00214    0.00309    0.00020
C10   1    1.358990    0.637769    0.310750    11.00000    0.03097    0.05195 =
         0.03114   -0.00337    0.00674    0.00052
AFIX  43
H10   2    1.361659    0.658975    0.217854    11.00000   -1.20000
AFIX   0
C11   1    1.408535    0.565231    0.369547    11.00000    0.03046    0.05106 =
         0.04453   -0.00433    0.00941    0.00468
AFIX  43
H11   2    1.446294    0.535311    0.315747    11.00000   -1.20000
AFIX   0
C12   1    1.404536    0.534358    0.507596    11.00000    0.02991    0.04673 =
         0.04982    0.00492    0.00293    0.00563
AFIX  43
H12   2    1.439951    0.484446    0.544326    11.00000   -1.20000
AFIX   0
C13   1    1.351026    0.574154    0.590824    11.00000    0.02993    0.04455 =
         0.03574    0.00819    0.00256    0.00059
AFIX  43
H13   2    1.349006    0.553154    0.683888    11.00000   -1.20000
AFIX   0
C14   1    1.299634    0.647003    0.532382    11.00000    0.02670    0.03656 =
         0.02795   -0.00092    0.00329    0.00047
C15   1    0.878111    0.839188    0.919994    11.00000    0.02882    0.03781 =
         0.02993    0.00204    0.00445    0.00181
C16   1    0.807631    0.821985    0.972155    11.00000    0.03204    0.03818 =
         0.03145    0.00132    0.00510    0.00098
C17   1    0.899515    0.980166    1.062341    11.00000    0.03900    0.04105 =
         0.03585   -0.00296    0.00061   -0.00406
AFIX  43
H17   2    0.929874    1.037971    1.095560    11.00000   -1.20000
AFIX   0
C18   1    0.831628    0.963327    1.117696    11.00000    0.04107    0.04557 =
         0.03557   -0.00799    0.00573    0.00051
AFIX  43
H18   2    0.816868    1.008995    1.190048    11.00000   -1.20000
AFIX   0
C19   1    0.755897    0.735134    0.919678    11.00000    0.03164    0.04284 =
         0.03218   -0.00560    0.00884   -0.00190
AFIX  13
H19   2    0.775857    0.705661    0.833193    11.00000   -1.20000
AFIX   0
C20   1    0.678224    0.780478    0.887740    11.00000    0.03445    0.04257 =
         0.03341    0.00769    0.00340   -0.00256
AFIX  23
H20A  2    0.659002    0.815376    0.970417    11.00000   -1.20000
H20B  2    0.680917    0.836385    0.815495    11.00000   -1.20000
AFIX   0
C21   1    0.625789    0.690500    0.840578    11.00000    0.03551    0.05419 =
         0.03541    0.00725   -0.00008   -0.00552
AFIX  23
H21A  2    0.575785    0.720828    0.821622    11.00000   -1.20000
H21B  2    0.643493    0.657736    0.755352    11.00000   -1.20000
AFIX   0
C22   1    0.751436    0.641178    1.022832    11.00000    0.03297    0.03713 =
         0.04617   -0.00070    0.00075    0.00352
AFIX  23
H22A  2    0.800614    0.606248    1.033519    11.00000   -1.20000
H22B  2    0.738050    0.670482    1.112802    11.00000   -1.20000
AFIX   0
C23   1    0.694342    0.556383    0.976879    11.00000    0.03796    0.03872 =
         0.05619    0.00001    0.00087   -0.00069
AFIX  23
H23A  2    0.711395    0.519167    0.894055    11.00000   -1.20000
H23B  2    0.689329    0.501246    1.049499    11.00000   -1.20000
AFIX   0
C24   1    0.569499    0.603899    1.041054    11.00000    0.03698    0.05280 =
         0.04216    0.00687    0.00405   -0.00618
C25   1    0.500327    0.670159    1.013490    11.00000    0.03917    0.08707 =
         0.07077    0.01549    0.01886    0.00884
AFIX 137
H25A  2    0.464543    0.655225    1.084155    11.00000   -1.50000
H25B  2    0.478642    0.650687    0.923901    11.00000   -1.50000
H25C  2    0.512906    0.747566    1.014524    11.00000   -1.50000
AFIX   0
HKLF 4
 
REM  amg4709 in P2(1)/c
REM R1 =  0.0454 for    2930 Fo > 4sig(Fo)  and  0.0653 for all    3963 data
REM    299 parameters refined using      0 restraints
 
END  
     
WGHT      0.0667      0.0000 

REM Instructions for potential hydrogen bonds
HTAB N1 N2_$1
EQIV $2 -x+2, -y+2, -z+1
HTAB C6 O2_$2
EQIV $3 -x+2, -y+1, -z+2
HTAB C13 O3_$3
EQIV $4 -x+2, y-1/2, -z+3/2
HTAB C22 O2_$4

REM Highest difference peak  0.187,  deepest hole -0.227,  1-sigma level  0.049
Q1    1   0.8160  0.6808  0.8562  11.00000  0.05    0.19
Q2    1   1.2012  0.6917  0.6734  11.00000  0.05    0.19
Q3    1   1.2289  0.6867  0.6756  11.00000  0.05    0.19
Q4    1   0.4535  0.6538  0.8175  11.00000  0.05    0.18
Q5    1   0.9594  0.6221  0.7644  11.00000  0.05    0.18

REM The information below was added by Olex2.
REM
REM R1 = 0.0454 for 2930 Fo > 4sig(Fo) and 0.0653 for all 14509 data
REM n/a parameters refined using n/a restraints
REM Highest difference peak 0.19, deepest hole -0.23
REM Mean Shift 0, Max Shift -0.001.

REM +++ Tabular Listing of Refinement Information +++
REM R1_all = 0.0653
REM R1_gt = 0.0454
REM wR_ref = 0.1259
REM GOOF = 1.023
REM Shift_max = -0.001
REM Shift_mean = 0
REM Reflections_all = 14509
REM Reflections_gt = 2930
REM Parameters = n/a
REM Hole = -0.23
REM Peak = 0.19
REM Flack = n/a

;
_olex2_diffrn_ambient_temperature_device 'Oxford Cryosystems'
_olex2_exptl_crystal_mounting_method
'The crystal was mounted on a nylon loop with paratone oil'
_olex2_submission_original_sample_id '146608 vial 3 thin'
_olex2_submission_special_instructions 'No special instructions were received'
loop_
  _refln_index_h
  _refln_index_k
  _refln_index_l
  _refln_F_squared_meas
  _refln_F_squared_sigma
 0 0 1 0.59 0.08
 0 0 -1 0.42 0.07
 0 0 -1 0.41 0.06
 0 0 1 0.81 0.09
 0 0 1 0.49 0.06
 0 0 2 553.2 23.35
 0 0 -2 557.25 26.63
 0 0 2 563.12 30.34
 0 0 2 550.15 26.62
 0 0 -3 0 0.07
 0 0 3 0.07 0.1
 0 0 3 -0.1 0.05
 0 0 -3 0.05 0.08
 0 0 4 21.24 1.16
 0 0 4 19.21 1.33
 0 0 -4 20.77 1.33
 0 0 5 -0.21 0.15
 0 0 5 0.01 0.14
 0 0 6 1.17 0.33
 0 0 6 0.96 0.3
 0 0 7 -0.11 0.23
 0 0 8 0.9 0.3
 0 0 -8 0.62 0.17
 0 0 8 0.55 0.19
 0 0 -9 -0.12 0.09
 0 0 9 -0.04 0.13
 0 0 9 0.09 0.17
 0 0 10 1.91 0.23
 0 0 10 1.68 0.25
 0 0 10 1.67 0.31
 0 0 11 -0.22 0.08
 0 0 11 0.01 0.13
 0 1 0 0.14 0.05
 0 1 0 0.17 0.06
 0 -1 0 0.05 0.04
 0 1 1 2.98 0.19
 0 1 1 2.61 0.25
 0 1 -1 2.79 0.18
 0 1 1 3.02 0.19
 0 1 -1 2.61 0.19
 0 -1 -1 2.69 0.22
 0 -1 -1 2.93 0.24
 0 -1 1 3.14 0.18
 0 -1 1 2.98 0.22
 0 -1 -1 3.23 0.24
 0 1 2 44.44 1.99
 0 1 2 44.23 2.51
 0 1 -2 41.87 2.48
 0 1 -2 45 2.16
 0 -1 2 42.44 2
 0 -1 2 45.73 2.16
 0 -1 2 46.2 2.49
 0 -1 -2 43.16 2.25
 0 -1 -2 43.81 2.24
 0 1 -3 0.57 0.12
 0 1 3 0.65 0.16
 0 1 3 0.42 0.14
 0 1 -3 0.56 0.08
 0 -1 -3 0.61 0.15
 0 -1 3 0.72 0.16
 0 -1 -3 0.77 0.17
 0 -1 3 0.55 0.15
 0 -1 3 0.69 0.09
 0 1 4 2.91 0.38
 0 1 4 2.41 0.33
 0 -1 -4 3.22 0.36
 0 -1 4 3.09 0.37
 0 -1 4 2.79 0.37
 0 1 5 5.18 0.54
 0 1 5 4.56 0.53
 0 -1 5 5.51 0.57
 0 -1 5 3.9 0.52
 0 1 6 0.05 0.19
 0 1 6 -0.11 0.21
 0 -1 6 -0.07 0.24
 0 -1 6 0.14 0.2
 0 1 7 3.07 0.53
 0 1 -7 2.23 0.26
 0 -1 7 1.82 0.46
 0 1 -8 0.82 0.16
 0 1 8 0.72 0.22
 0 1 8 1.15 0.21
 0 -1 -8 1.32 0.25
 0 -1 8 1.24 0.27
 0 1 9 0.24 0.14
 0 1 9 -0.17 0.1
 0 1 -9 0.03 0.08
 0 1 9 0.11 0.15
 0 -1 -9 -0.02 0.11
 0 -1 9 0.28 0.16
 0 -1 9 0.25 0.15
 0 1 10 0.12 0.11
 0 1 10 0.12 0.15
 0 1 10 0.06 0.11
 0 -1 -10 0.2 0.1
 0 -1 10 0.16 0.12
 0 -1 10 -0.11 0.14
 0 1 11 0.1 0.11
 0 1 11 -0.04 0.07
 0 -1 11 -0.04 0.09
 0 -1 11 -0.03 0.09
 0 -1 11 -0.16 0.13
 0 2 0 165.03 9.5
 0 2 0 174.82 8.27
 0 -2 0 171.57 8.27
 0 2 1 21.68 1.42
 0 2 -1 21.06 1.33
 0 2 -1 24.18 1.08
 0 2 -1 22.84 1.18
 0 2 1 22.4 1.23
 0 -2 1 23.12 1.18
 0 -2 -1 22.59 1.24
 0 2 -2 32.62 1.62
 0 2 -2 31.18 1.84
 0 2 2 33.3 1.5
 0 -2 -2 32.92 1.74
 0 -2 -2 32.57 1.75
 0 -2 2 32.24 1.63
 0 -2 2 31.7 1.54
 0 2 -3 1.98 0.15
 0 2 3 2.2 0.22
 0 2 3 2.08 0.27
 0 -2 3 2.23 0.15
 0 -2 3 2.09 0.25
 0 -2 3 2.21 0.29
 0 -2 -3 1.88 0.27
 0 2 4 0.28 0.14
 0 2 4 0.17 0.12
 0 -2 4 -0.01 0.11
 0 -2 -4 0.15 0.11
 0 -2 4 0.08 0.13
 0 2 5 8.17 0.73
 0 2 5 8.86 0.68
 0 -2 5 7.57 0.74
 0 -2 5 8.21 0.76
 0 2 6 0.27 0.19
 0 -2 6 0.29 0.24
 0 -2 6 0.3 0.21
 0 2 7 1.83 0.43
 0 2 -7 1.53 0.19
 0 -2 7 1.81 0.49
 0 2 8 2.49 0.29
 0 2 8 3.23 0.35
 0 2 -8 2.88 0.21
 0 2 8 2.74 0.38
 0 -2 -8 3.82 0.42
 0 -2 8 3.58 0.37
 0 -2 -8 2.37 0.26
 0 2 9 0.48 0.14
 0 2 9 0.82 0.2
 0 2 9 0.69 0.23
 0 -2 9 0.95 0.23
 0 -2 -9 0.76 0.2
 0 2 10 0.76 0.15
 0 2 10 0.75 0.19
 0 -2 -10 0.63 0.17
 0 -2 10 1.11 0.22
 0 -2 10 0.65 0.18
 0 2 11 3.89 0.29
 0 -2 11 3.81 0.32
 0 -2 11 3.7 0.27
 0 3 0 0.04 0.1
 0 3 0 -0.08 0.1
 0 3 0 0.04 0.06
 0 -3 0 -0.01 0.11
 0 3 -1 8.81 0.51
 0 3 1 8.38 0.62
 0 3 -1 8.27 0.64
 0 3 -1 8.44 0.56
 0 3 1 8.87 0.73
 0 3 1 9.13 0.5
 0 -3 1 8.56 0.58
 0 3 -2 93.64 5.29
 0 3 -2 94.95 4.62
 0 -3 2 96.87 4.63
 0 -3 -2 90.95 4.75
 0 -3 2 92.21 4.14
 0 3 3 22.12 1.16
 0 3 -3 21.87 1.17
 0 -3 -3 23.49 1.38
 0 -3 3 22.16 1.3
 0 -3 3 23.54 1.23
 0 3 4 4.77 0.48
 0 -3 4 4.57 0.51
 0 -3 -4 4.09 0.53
 0 -3 4 4.62 0.44
 0 3 5 6.65 0.64
 0 -3 5 6.65 0.67
 0 -3 5 5.56 0.63
 0 3 6 4.84 0.59
 0 -3 6 3.76 0.56
 0 -3 6 4.99 0.67
 0 3 7 4.03 0.42
 0 3 8 0.18 0.16
 0 3 8 0.17 0.14
 0 -3 -8 0.15 0.15
 0 -3 -8 -0.05 0.13
 0 3 9 0.35 0.16
 0 3 9 0.29 0.12
 0 -3 -9 0.37 0.19
 0 -3 -9 0.43 0.12
 0 -3 9 0.46 0.22
 0 3 10 0.63 0.15
 0 -3 10 0.19 0.18
 0 -3 10 0.22 0.14
 0 -3 -10 0.25 0.13
 0 3 11 0 0.08
 0 -3 11 0.33 0.13
 0 -3 11 0.15 0.12
 0 -3 -11 0.13 0.09
 0 4 0 5.19 0.53
 0 4 0 5.25 0.48
 0 4 1 0.42 0.13
 0 4 -1 0.37 0.12
 0 4 -1 0.09 0.13
 0 4 -1 0.33 0.15
 0 4 1 0.28 0.21
 0 -4 -1 0.26 0.14
 0 4 2 51.44 2.39
 0 4 -2 54.68 3.1
 0 4 -2 51.86 2.7
 0 -4 -2 49.14 2.82
 0 -4 2 52.73 2.44
 0 -4 2 53.27 2.72
 0 -4 3 28.25 1.46
 0 -4 -3 26.3 1.67
 0 4 4 13.63 0.87
 0 -4 -4 14.1 1.05
 0 -4 4 12.65 0.9
 0 4 5 22.84 1.34
 0 -4 5 21.72 1.37
 0 -4 6 1.76 0.41
 0 4 -7 5.22 0.32
 0 4 7 4.43 0.42
 0 -4 -7 4.31 0.42
 0 4 8 8.58 0.59
 0 -4 -8 9.04 0.58
 0 4 9 3.61 0.35
 0 -4 -9 4.28 0.45
 0 -4 -9 3.65 0.31
 0 4 10 0.19 0.1
 0 -4 -10 0.4 0.15
 0 -4 10 0.1 0.14
 0 -4 -11 0.84 0.14
 0 -4 11 1.54 0.2
 0 -4 11 0.86 0.17
 0 5 0 0.04 0.1
 0 5 0 -0.12 0.14
 0 5 0 0.07 0.19
 0 -5 0 0.04 0.11
 0 5 -1 48.23 2.27
 0 5 -1 46.42 2.61
 0 5 -1 50.63 3.01
 0 5 1 49.46 2.23
 0 -5 -1 46.32 2.67
 0 5 2 5.51 0.42
 0 5 -2 5.44 0.48
 0 -5 -2 4.37 0.58
 0 -5 2 5.26 0.5
 0 5 3 2.4 0.34
 0 -5 -3 3.08 0.48
 0 -5 3 2.56 0.38
 0 -5 -4 4.42 0.63
 0 -5 4 5.28 0.58
 0 -5 5 0.87 0.33
 0 5 6 1.35 0.21
 0 -5 6 1.25 0.37
 0 5 -7 2.42 0.26
 0 5 7 2.35 0.26
 0 -5 -7 2.71 0.32
 0 5 8 1 0.17
 0 5 -8 0.65 0.15
 0 -5 -8 1.01 0.23
 0 5 9 -0.11 0.08
 0 -5 -9 0.08 0.14
 0 -5 -9 0.14 0.13
 0 -5 -10 1.62 0.24
 0 -5 10 1.43 0.22
 0 -5 -11 -0.08 0.08
 0 -5 11 0 0.14
 0 -5 11 0.02 0.11
 0 6 0 14.83 0.86
 0 -6 0 14.17 1.06
 0 6 -1 1.89 0.28
 0 -6 1 1.81 0.34
 0 -6 -1 1.76 0.36
 0 -6 2 1.54 0.31
 0 -6 -2 1.05 0.32
 0 -6 2 1.83 0.31
 0 6 3 0.6 0.27
 0 -6 3 0.37 0.23
 0 -6 4 12.13 0.94
 0 -6 5 -0.05 0.19
 0 6 6 0.04 0.07
 0 6 -6 -0.04 0.09
 0 6 -7 2.09 0.24
 0 -6 -7 2.33 0.34
 0 6 -8 0.08 0.13
 0 -6 -8 0.42 0.18
 0 6 -9 0.57 0.15
 0 -6 -9 0.35 0.13
 0 -6 10 0.67 0.2
 0 -6 -10 0.73 0.19
 0 7 0 -0.21 0.24
 0 -7 0 -0.13 0.17
 0 7 1 -0.12 0.27
 0 -7 1 0.05 0.17
 0 7 2 12.28 1.02
 0 -7 2 12.03 0.85
 0 7 3 1.61 0.42
 0 -7 3 1.78 0.39
 0 7 4 1.05 0.36
 0 -7 4 1.15 0.33
 0 -7 5 0.39 0.3
 0 7 -6 0.45 0.12
 0 7 -7 1.32 0.2
 0 -7 -7 1.71 0.31
 0 7 -8 0.39 0.14
 0 -7 -8 0.14 0.17
 0 7 -9 1.63 0.21
 0 -7 -9 1.11 0.19
 0 7 -10 0.03 0.09
 0 -7 -10 0.09 0.13
 0 8 0 3.16 0.59
 0 8 1 0.84 0.39
 0 8 -1 1.19 0.4
 0 8 2 0.08 0.2
 0 8 3 4.05 0.66
 0 8 3 4.49 0.52
 0 8 4 1.13 0.33
 0 8 4 0.88 0.17
 0 8 4 0.22 0.28
 0 8 5 0.48 0.27
 0 8 -5 0.34 0.1
 0 8 5 0.36 0.13
 0 8 -6 1.6 0.19
 0 8 -7 0.45 0.13
 0 -8 -7 0.42 0.23
 0 8 -8 3.05 0.28
 0 -8 -8 2.61 0.32
 0 8 -9 2.58 0.25
 0 -8 -9 2.38 0.24
 0 9 0 0.26 0.35
 0 9 1 1.55 0.32
 0 9 -1 2.08 0.53
 0 9 1 1.38 0.46
 0 9 2 0.11 0.25
 0 9 2 0.22 0.25
 0 9 2 0.01 0.1
 0 9 3 1 0.33
 0 9 3 0.55 0.39
 0 9 3 0.8 0.16
 0 9 -4 4.14 0.25
 0 9 4 3.6 0.67
 0 9 4 3.8 0.33
 0 9 4 3.75 0.54
 0 9 -5 3.56 0.28
 0 9 5 3.61 0.33
 0 9 5 3.06 0.45
 0 9 -6 1.33 0.18
 0 9 6 1.43 0.22
 0 9 6 0.94 0.31
 0 9 -7 1.54 0.19
 0 -9 -7 1.49 0.29
 0 9 -8 3.28 0.28
 0 -9 -8 3.42 0.33
 0 9 -9 -0.01 0.08
 0 -9 -9 -0.04 0.09
 0 10 0 0.15 0.35
 0 10 -1 0.03 0.38
 0 10 1 0.05 0.08
 0 10 1 0.22 0.27
 0 10 1 0.25 0.36
 0 10 2 1.44 0.51
 0 10 2 1.31 0.37
 0 10 2 1.91 0.2
 0 10 3 7.18 0.42
 0 10 3 6.81 0.95
 0 10 3 7.05 0.73
 0 10 -4 0.86 0.12
 0 10 4 0.35 0.14
 0 10 4 0.38 0.27
 0 10 4 1.08 0.46
 0 10 5 1.72 0.33
 0 10 5 1.17 0.49
 0 10 -5 2.11 0.19
 0 10 5 2.07 0.25
 0 10 6 10.74 0.6
 0 10 -6 11.33 0.54
 0 10 6 12.27 1.23
 0 10 6 10 0.83
 0 10 -7 0.07 0.09
 0 10 7 0.22 0.22
 0 10 -8 1.64 0.17
 0 10 8 1.52 0.4
 0 -10 -8 1.47 0.2
 0 11 0 -0.05 0.37
 0 11 1 1 0.41
 0 11 1 0.94 0.14
 0 11 1 0.83 0.32
 0 11 2 11.06 1.27
 0 11 2 12.55 0.62
 0 11 2 13.73 1
 0 11 3 6.15 0.92
 0 11 3 5.27 0.62
 0 11 3 5.09 0.34
 0 11 4 1.14 0.19
 0 11 4 1 0.31
 0 11 4 1.17 0.4
 0 11 -4 1.13 0.13
 0 11 5 0.03 0.1
 0 11 5 -0.23 0.18
 0 11 5 -0.04 0.33
 0 11 -5 0.1 0.08
 0 11 6 0.15 0.37
 0 11 6 -0.08 0.08
 0 11 6 -0.03 0.12
 0 11 -6 -0.07 0.07
 0 11 7 0.01 0.35
 0 11 -7 -0.04 0.06
 0 11 7 -0.03 0.09
 0 -11 -7 -0.11 0.13
 0 12 0 0.24 0.43
 0 12 1 0.87 0.39
 0 12 1 0.63 0.11
 0 12 2 7.22 1
 0 12 2 7.42 0.68
 0 12 2 7.61 0.42
 0 12 3 0.08 0.22
 0 12 3 0.41 0.12
 0 12 3 -0.37 0.34
 0 12 4 -0.34 0.28
 0 12 4 0.27 0.12
 0 12 4 -0.2 0.19
 0 12 5 -0.13 0.34
 0 12 5 0.15 0.2
 0 12 -5 0.2 0.07
 0 12 5 0.13 0.1
 0 12 6 0.01 0.08
 0 12 -6 0.03 0.05
 0 12 6 0.13 0.25
 0 13 1 0.15 0.07
 0 13 1 0.39 0.42
 0 13 2 0.83 0.47
 0 13 2 0.64 0.24
 0 13 2 0.68 0.12
 0 13 3 1.42 0.46
 0 13 3 2.8 0.22
 0 13 3 2.13 0.35
 0 13 4 -0.01 0.17
 0 13 4 0.14 0.08
 0 13 5 0.36 0.25
 0 13 5 0.09 0.08
 0 14 2 2.7 0.19
 0 14 3 0.06 0.21
 0 14 3 -0.08 0.07
 -1 0 11 -0.13 0.09
 -1 0 11 -0.02 0.15
 -1 0 10 0.81 0.23
 -1 0 10 0.73 0.18
 -1 0 10 0.71 0.18
 -1 0 9 0.03 0.17
 1 0 -9 0.03 0.1
 -1 0 9 0 0.12
 -1 0 8 0.22 0.17
 1 0 -8 0.21 0.14
 -1 0 7 -0.13 0.21
 -1 0 6 1.46 0.39
 -1 0 6 1.99 0.4
 -1 0 5 0.04 0.17
 -1 0 5 -0.19 0.1
 1 0 -3 -0.04 0.09
 -1 0 3 0.05 0.1
 -1 0 3 -0.06 0.08
 -1 0 3 0.15 0.11
 1 0 -3 -0.09 0.12
 1 0 -2 21.7 1.15
 -1 0 2 21.51 1.3
 -1 0 2 22.14 1.15
 -1 0 2 21.58 1.06
 -1 0 1 0.21 0.07
 -1 0 1 0.13 0.05
 1 0 -1 0.15 0.07
 1 0 -1 0.12 0.07
 -1 0 1 0.18 0.06
 -1 0 1 0.19 0.06
 -1 0 0 40.01 2.52
 -1 0 0 49.49 1.91
 -1 0 -1 0.23 0.06
 1 0 1 0.42 0.07
 1 0 1 0.2 0.04
 1 0 1 0.14 0.06
 -1 0 -1 0.2 0.04
 -1 0 -1 0.12 0.06
 1 0 2 66.83 2.89
 -1 0 -2 62.39 3.73
 1 0 2 67.14 3.69
 -1 0 -2 66.49 3.19
 -1 0 -2 64.97 3.19
 1 0 3 -0.04 0.12
 -1 0 -3 0.05 0.12
 -1 0 -3 -0.04 0.05
 1 0 3 0.07 0.11
 -1 0 -3 0.04 0.07
 1 0 4 6 0.54
 1 0 4 6.29 0.56
 -1 0 -4 7.56 0.62
 -1 0 -4 4.8 0.48
 1 0 5 0.05 0.15
 1 0 5 -0.17 0.17
 1 0 6 61.07 2.93
 1 0 6 53.96 3.49
 1 0 7 0.35 0.35
 1 0 8 1.83 0.26
 1 0 8 1.84 0.3
 -1 0 -8 1.43 0.23
 1 0 9 0.03 0.14
 1 0 9 -0.04 0.16
 -1 0 -9 -0.02 0.11
 1 0 10 2.75 0.37
 1 0 10 3.25 0.29
 1 0 10 3.23 0.35
 1 0 11 0 0.13
 1 0 11 0.03 0.09
 -1 1 11 2.22 0.27
 -1 1 11 2.65 0.19
 -1 -1 11 2.62 0.31
 -1 -1 11 2.87 0.21
 -1 -1 11 2.65 0.26
 -1 1 10 4.97 0.45
 -1 1 10 4.53 0.38
 1 -1 -10 4.88 0.37
 -1 -1 10 5.01 0.37
 -1 -1 10 4.66 0.43
 -1 1 9 2.17 0.3
 -1 1 9 2.35 0.33
 1 1 -9 2.42 0.22
 -1 1 9 2.34 0.28
 -1 -1 9 2.1 0.35
 1 -1 -9 2.15 0.28
 -1 -1 9 3.06 0.32
 -1 1 8 14.59 0.87
 1 1 -8 13.79 0.77
 -1 1 8 14.99 0.77
 1 -1 -8 14.38 0.84
 -1 -1 8 12.49 0.79
 -1 1 7 0.97 0.33
 1 1 -7 0.96 0.18
 -1 -1 7 1.52 0.44
 -1 1 6 7.53 0.77
 -1 1 6 7.16 0.72
 -1 -1 6 7.2 0.75
 -1 -1 6 6.47 0.71
 -1 1 5 4.56 0.53
 -1 1 5 4.88 0.54
 1 -1 -5 4.88 0.61
 -1 -1 5 4.34 0.54
 -1 -1 5 4.49 0.52
 1 1 -4 1.29 0.18
 -1 1 4 0.97 0.22
 -1 1 4 1.31 0.24
 -1 -1 4 1.37 0.26
 1 -1 -4 1.63 0.27
 -1 -1 4 1.56 0.27
 -1 1 3 19.43 1.05
 1 1 -3 19.69 1.08
 -1 1 3 20.01 1.25
 -1 1 3 19.52 1.15
 1 -1 -3 20.12 1.17
 -1 -1 3 19.56 1.06
 -1 -1 3 20.55 1.08
 1 -1 -3 20.21 1.15
 -1 -1 3 20.12 1.26
 1 1 -2 30.85 1.54
 -1 1 2 29.1 1.41
 -1 1 2 28.98 1.81
 -1 1 2 29.49 1.59
 -1 1 2 30.07 1.74
 -1 -1 2 31.02 1.54
 -1 -1 2 29.52 1.42
 -1 -1 2 31.43 1.74
 1 -1 -2 29.94 1.59
 -1 1 1 4.61 0.37
 -1 1 1 4.71 0.3
 -1 1 1 4.61 0.32
 1 -1 -1 4.67 0.32
 -1 -1 1 4.43 0.28
 -1 -1 1 4.05 0.3
 1 -1 -1 4.55 0.33
 -1 -1 1 4.82 0.28
 1 1 0 0.64 0.1
 -1 1 0 0.61 0.12
 -1 1 0 0.51 0.09
 -1 1 0 0.7 0.09
 -1 -1 0 0.67 0.05
 -1 -1 0 0.57 0.1
 1 -1 0 0.64 0.09
 -1 1 -1 20.89 1.26
 1 1 1 21.24 1.21
 -1 1 -1 20.43 0.98
 1 1 1 21.62 0.94
 1 1 1 21.15 1.11
 -1 -1 -1 21.91 1.12
 1 -1 1 21.46 1.04
 1 -1 1 20.83 1.04
 1 1 2 21.51 1.29
 -1 1 -2 21.5 1.31
 1 1 2 21.71 1.03
 1 1 2 21.78 1.16
 1 -1 2 21.41 1.07
 1 -1 2 21.66 1.26
 -1 -1 -2 21.41 1.16
 1 1 3 6.99 0.54
 -1 1 -3 6.93 0.55
 1 1 3 7.1 0.47
 1 -1 3 6.71 0.49
 1 -1 3 6.76 0.54
 -1 -1 -3 7.18 0.49
 -1 -1 -3 6.58 0.48
 1 1 4 30.31 1.52
 1 1 4 30.67 1.84
 -1 -1 -4 30.08 1.92
 1 -1 4 28 1.53
 1 -1 4 28.3 1.83
 -1 -1 -4 28.8 1.6
 1 1 5 1.58 0.33
 1 1 5 1.89 0.35
 1 -1 5 1.37 0.29
 1 -1 5 1.91 0.35
 1 1 6 7.7 0.73
 1 1 6 6.23 0.72
 1 -1 6 6.16 0.7
 1 -1 6 7.4 0.74
 1 1 7 0.45 0.36
 -1 1 -7 1.19 0.19
 1 -1 7 0.9 0.39
 -1 1 -8 1.17 0.19
 1 1 8 1.59 0.24
 1 1 8 1.14 0.22
 1 -1 8 0.89 0.25
 -1 -1 -8 1.06 0.21
 -1 1 -9 6.99 0.39
 1 1 9 6.73 0.62
 1 1 9 6.51 0.45
 1 1 9 6.25 0.51
 1 -1 9 6.57 0.48
 1 -1 9 6.97 0.59
 -1 -1 -9 6.83 0.49
 1 1 10 2.82 0.23
 1 1 10 2.67 0.28
 1 1 10 2.99 0.34
 1 -1 10 2.77 0.29
 -1 -1 -10 1.84 0.22
 1 -1 10 2.58 0.32
 1 1 11 4.46 0.27
 1 1 11 4.04 0.34
 1 -1 11 4.54 0.28
 1 -1 11 4.32 0.33
 -1 2 11 0.18 0.1
 -1 -2 11 -0.19 0.09
 -1 -2 11 0.14 0.11
 -1 2 10 5.4 0.36
 -1 2 10 6.09 0.46
 -1 -2 10 5.15 0.47
 1 -2 -10 5.52 0.42
 -1 -2 10 5.7 0.42
 -1 2 9 2.14 0.26
 -1 2 9 1.98 0.2
 -1 2 9 1.87 0.29
 -1 -2 9 1.47 0.27
 1 -2 -9 1.97 0.28
 -1 2 8 0.38 0.17
 1 2 -8 0.12 0.08
 -1 2 8 0.08 0.12
 -1 2 8 0.19 0.13
 -1 -2 8 0.24 0.23
 1 -2 -8 0.1 0.12
 1 -2 -8 0.6 0.2
 1 2 -7 4.09 0.31
 -1 2 7 3.91 0.65
 -1 -2 7 4.5 0.64
 -1 2 6 1.17 0.31
 -1 -2 6 1.59 0.38
 1 -2 -6 1.69 0.49
 -1 -2 6 1.23 0.33
 -1 2 5 26.75 1.44
 -1 2 5 23.63 1.56
 -1 -2 5 24.91 1.68
 -1 -2 5 25.02 1.45
 -1 2 4 8.39 0.61
 -1 -2 4 7.74 0.65
 -1 -2 4 7.36 0.6
 1 -2 -4 8.38 0.66
 -1 2 3 0.06 0.1
 1 2 -3 0.05 0.06
 1 -2 -3 0.04 0.14
 -1 -2 3 0.08 0.09
 -1 -2 3 0 0.11
 -1 -2 3 0.03 0.14
 -1 2 2 31.88 2.01
 1 2 -2 33.38 1.68
 -1 2 2 31.85 1.53
 -1 -2 2 32.67 1.54
 1 -2 -2 32.7 1.76
 -1 -2 2 32.24 1.79
 -1 2 1 16.88 1.14
 -1 2 1 18.19 0.87
 1 2 -1 17.8 0.97
 1 -2 -1 16.93 1
 -1 -2 1 17.74 0.85
 1 -2 -1 17.86 1
 -1 -2 1 17.23 0.96
 -1 2 0 88.17 5.22
 1 2 0 93.74 3.91
 1 2 0 92.96 4.56
 -1 2 0 91.44 3.97
 1 -2 0 92.18 4.54
 1 -2 0 94.45 4.54
 -1 -2 0 93.24 4.55
 1 2 1 9.19 0.61
 -1 2 -1 10.03 0.54
 -1 2 -1 9.02 0.65
 1 2 1 9.85 0.47
 1 -2 1 9.94 0.55
 -1 -2 -1 9.16 0.61
 1 -2 1 9.47 0.55
 -1 -2 -1 9.58 0.57
 1 2 2 211.96 10.31
 -1 2 -2 215.2 11.75
 1 2 2 211.9 8.97
 1 -2 2 220.89 10.15
 1 -2 2 200.85 9.02
 -1 -2 -2 202.47 10.31
 1 -2 2 216.44 10.15
 -1 2 -3 15.73 0.99
 1 2 3 15.48 0.84
 1 -2 3 15.35 0.98
 -1 -2 -3 16.38 0.98
 1 -2 3 15.36 0.9
 1 2 4 0.83 0.18
 1 2 4 0.46 0.16
 1 -2 4 0.54 0.18
 -1 -2 -4 0.41 0.17
 1 -2 4 0.57 0.21
 1 2 5 0.02 0.14
 1 2 5 0.15 0.15
 1 -2 5 0.01 0.17
 1 -2 5 0 0.13
 1 2 6 4.01 0.55
 1 -2 6 4.25 0.58
 1 -2 6 3.55 0.59
 -1 2 -7 0.64 0.13
 1 2 7 0.68 0.31
 1 -2 7 0.58 0.37
 1 2 8 6.64 0.5
 1 2 8 6.02 0.43
 1 2 8 5.98 0.56
 -1 -2 -8 6.03 0.54
 -1 -2 -8 6.31 0.4
 1 2 9 0.09 0.11
 1 2 9 -0.1 0.1
 1 2 9 0.08 0.11
 -1 -2 -9 -0.04 0.12
 1 -2 9 -0.1 0.15
 1 2 10 1.61 0.2
 1 2 10 1.78 0.26
 -1 -2 -10 1.95 0.25
 1 -2 10 1.77 0.26
 1 -2 10 2.34 0.31
 1 2 11 0.78 0.14
 1 -2 11 0.63 0.13
 1 -2 11 0.69 0.14
 -1 3 11 0.08 0.07
 1 -3 -11 0.1 0.09
 -1 -3 11 -0.07 0.11
 -1 -3 11 0.24 0.14
 -1 3 10 1.67 0.22
 1 -3 -10 1.31 0.23
 -1 -3 10 1.52 0.27
 -1 -3 10 1.53 0.23
 -1 3 9 0.42 0.17
 -1 3 9 0.32 0.12
 1 -3 -9 0.42 0.19
 -1 -3 9 0.18 0.2
 1 -3 -9 0.24 0.12
 -1 3 8 0.78 0.21
 -1 3 8 0.8 0.19
 1 -3 -8 0.67 0.17
 1 -3 -8 0.59 0.21
 -1 3 7 2.83 0.6
 -1 3 7 2.31 0.31
 -1 3 6 2.44 0.48
 -1 -3 6 1.81 0.39
 -1 -3 6 2.53 0.52
 -1 3 5 32.53 1.75
 1 -3 -5 31.03 1.96
 -1 -3 5 32.35 2.08
 -1 -3 5 31.35 1.77
 -1 3 4 0.35 0.19
 -1 -3 4 0.41 0.18
 -1 -3 4 0.58 0.2
 1 -3 -4 0.37 0.19
 -1 3 3 40.32 1.87
 1 3 -3 38.14 2
 1 -3 -3 38.97 2.16
 -1 -3 3 37.26 2.2
 -1 -3 3 38.75 1.89
 -1 3 2 32.25 1.51
 -1 3 2 30.25 1.99
 1 3 -2 32.76 1.66
 1 -3 -2 28.81 1.73
 -1 -3 2 30.15 1.49
 -1 -3 2 30.82 1.65
 -1 3 1 5.52 0.54
 -1 3 1 5.81 0.41
 1 3 -1 5.91 0.45
 -1 -3 1 6.14 0.39
 -1 -3 1 5.7 0.44
 1 -3 -1 5.79 0.48
 1 3 0 21.94 1.18
 -1 3 0 21.21 1.01
 -1 3 0 19.75 1.34
 1 3 0 20.95 0.95
 1 -3 0 20.77 1.17
 -1 -3 0 19.66 1.16
 1 -3 0 17.79 1.14
 1 3 1 0.2 0.12
 -1 3 -1 0.1 0.13
 1 3 1 0.05 0.06
 -1 3 -1 0.08 0.09
 1 -3 1 0.19 0.09
 1 -3 1 0.11 0.1
 -1 3 -2 40.99 2.41
 1 3 2 40.94 1.85
 1 3 2 38.25 2.19
 1 -3 2 42.59 1.93
 1 -3 2 40.11 2.05
 1 -3 2 40.47 2.05
 -1 3 -3 2.49 0.29
 1 3 3 2.35 0.28
 1 -3 3 2.58 0.35
 -1 -3 -3 2.54 0.35
 1 3 4 29.57 1.49
 1 -3 4 28.76 1.57
 1 -3 4 28.04 1.79
 -1 -3 -4 29.31 1.73
 1 3 5 0.61 0.21
 1 -3 5 0.35 0.19
 1 -3 5 0.27 0.21
 1 -3 6 1.54 0.41
 1 -3 6 1.79 0.42
 1 3 7 0.69 0.21
 1 3 8 2.57 0.28
 1 3 8 2.21 0.31
 -1 -3 -8 2.42 0.37
 -1 -3 -8 2.29 0.28
 1 3 9 5.48 0.49
 1 3 9 5.62 0.39
 -1 -3 -9 5.5 0.5
 1 -3 9 6.16 0.51
 1 3 10 0.36 0.14
 -1 -3 -10 0.23 0.14
 1 -3 10 0.36 0.19
 1 -3 10 0.53 0.19
 1 3 11 1.88 0.17
 1 -3 11 2.16 0.24
 -1 -3 -11 1.61 0.15
 1 -3 11 1.89 0.2
 -1 -4 11 1.09 0.17
 -1 -4 11 1.05 0.17
 1 -4 -10 13.1 0.77
 -1 -4 10 12.18 0.7
 -1 4 9 0.81 0.18
 1 -4 -9 0.99 0.23
 1 -4 -9 0.84 0.17
 -1 4 8 4.4 0.41
 1 -4 -8 4.26 0.39
 -1 4 7 6.49 0.51
 1 4 -7 8.07 0.42
 1 -4 -7 6.25 0.48
 -1 4 6 1.05 0.41
 -1 -4 6 0.93 0.31
 -1 4 5 30.11 1.62
 -1 -4 5 26.01 1.59
 1 -4 -5 26.9 1.81
 -1 4 4 2.45 0.36
 -1 -4 4 2.3 0.38
 1 -4 -4 2.63 0.44
 -1 4 3 3.12 0.36
 1 4 -3 2.6 0.31
 1 -4 -3 2.54 0.42
 -1 -4 3 2.45 0.33
 -1 4 2 0.32 0.21
 1 4 -2 -0.05 0.07
 -1 4 2 -0.02 0.12
 -1 -4 2 -0.02 0.09
 1 -4 -2 0.01 0.11
 1 4 -1 0.97 0.22
 -1 4 1 0.91 0.28
 -1 4 1 0.72 0.15
 -1 -4 1 0.79 0.15
 1 -4 -1 0.58 0.18
 1 4 0 7.98 0.44
 -1 4 0 7.32 0.67
 1 4 0 7.25 0.59
 -1 4 0 7.37 0.49
 1 -4 0 7.83 0.6
 1 4 1 9.65 0.55
 1 4 1 10.43 0.77
 -1 4 -1 10.81 0.83
 -1 4 -1 11.8 0.67
 1 -4 1 10.05 0.7
 -1 4 -2 20.22 1.07
 1 4 2 18.58 0.96
 -1 4 -2 19.29 1.29
 1 4 2 18.32 1.23
 1 -4 2 19.11 1.1
 1 -4 2 19.92 1.06
 1 -4 2 18.54 1.09
 1 4 3 22.17 1.13
 -1 -4 -3 20.68 1.38
 1 -4 3 21.64 1.23
 1 4 4 8.66 0.65
 -1 -4 -4 8.85 0.79
 1 -4 4 8.94 0.71
 1 -4 5 3.27 0.48
 1 -4 6 -0.02 0.27
 -1 4 -7 1.69 0.18
 1 4 7 1.04 0.2
 -1 -4 -7 0.84 0.21
 1 4 8 0.22 0.1
 1 4 8 0.12 0.14
 -1 -4 -8 -0.09 0.1
 1 4 9 0.23 0.14
 -1 -4 -9 0.47 0.2
 -1 -4 -9 0.22 0.13
 1 4 10 0.25 0.11
 1 -4 10 0.25 0.15
 -1 -4 -10 0.33 0.15
 1 -4 11 1.23 0.19
 1 -4 11 0.67 0.15
 -1 -4 -11 0.78 0.13
 -1 -5 11 0.43 0.15
 1 -5 -11 0.23 0.09
 -1 -5 11 0.34 0.13
 -1 -5 10 1.3 0.23
 1 -5 -10 1.42 0.23
 -1 5 9 0.06 0.08
 1 -5 -9 0.02 0.13
 1 -5 -9 -0.04 0.17
 1 5 -8 0.67 0.17
 -1 5 8 0.43 0.14
 1 -5 -8 0.23 0.16
 1 5 -7 0.11 0.1
 -1 5 7 0.19 0.1
 1 -5 -7 -0.15 0.17
 1 5 -6 0.55 0.11
 -1 5 6 0.06 0.1
 -1 -5 6 0.39 0.27
 -1 -5 5 0.05 0.17
 -1 5 4 1.89 0.34
 -1 -5 4 2.12 0.36
 1 -5 -4 2.36 0.5
 -1 5 3 57.75 2.72
 -1 -5 3 57.75 2.74
 1 -5 -3 54.71 3.18
 1 5 -2 15.47 1
 -1 5 2 15.49 0.9
 -1 -5 2 13.85 0.86
 1 -5 -2 13.74 1.08
 1 5 -1 4.35 0.48
 -1 5 1 3.2 0.52
 -1 5 1 3.57 0.37
 1 -5 -1 3.84 0.48
 -1 -5 1 3.92 0.36
 1 5 0 0.65 0.2
 -1 5 0 0.37 0.13
 -1 5 0 0.42 0.2
 1 5 0 0.5 0.13
 1 -5 0 0.35 0.19
 -1 5 -1 0.36 0.14
 1 5 1 0.37 0.11
 1 5 1 0.45 0.23
 -1 5 -1 0.53 0.24
 1 -5 1 0.19 0.13
 -1 5 -2 0.2 0.18
 1 -5 2 0.34 0.16
 1 -5 2 0.06 0.15
 -1 -5 -2 0.3 0.23
 1 -5 3 43.89 2.17
 -1 -5 -3 40.69 2.48
 -1 -5 -4 7.68 0.85
 1 -5 4 9.02 0.81
 1 -5 5 0.11 0.2
 -1 5 -6 0.27 0.11
 1 5 6 0.11 0.13
 1 -5 6 0.46 0.37
 -1 5 -7 0.55 0.16
 1 5 7 0.35 0.15
 -1 -5 -7 0.41 0.2
 -1 5 -8 0.33 0.14
 1 5 8 0.41 0.14
 -1 -5 -8 0.51 0.17
 1 5 9 0.15 0.1
 -1 -5 -9 -0.05 0.15
 -1 -5 -9 0.18 0.11
 1 -5 10 0.05 0.14
 -1 -5 -10 0.35 0.18
 -1 -5 -11 0.31 0.1
 1 -5 11 0.15 0.12
 1 -5 11 0.12 0.12
 1 -6 -10 0.21 0.15
 -1 -6 10 -0.18 0.13
 1 6 -9 0.51 0.16
 1 -6 -9 0.35 0.16
 1 6 -8 0.68 0.17
 1 -6 -8 0.93 0.21
 1 6 -7 0.02 0.1
 1 -6 -7 0.44 0.21
 1 6 -6 4.39 0.35
 -1 -6 5 1.1 0.34
 -1 6 4 -0.11 0.29
 -1 -6 4 0.24 0.24
 -1 6 3 13.86 1.07
 -1 -6 3 13.88 0.94
 -1 6 2 6.23 0.5
 1 6 -2 5.56 0.62
 -1 -6 2 6.09 0.56
 1 -6 -2 6.55 0.75
 1 6 -1 1.85 0.38
 -1 6 1 2.07 0.46
 -1 -6 1 1.38 0.23
 1 -6 -1 1.88 0.38
 1 6 0 3.44 0.49
 -1 6 0 3.66 0.6
 -1 6 0 3.9 0.43
 1 -6 0 3.79 0.51
 -1 6 -1 7.11 0.57
 -1 6 -1 7.08 0.82
 1 -6 1 6.69 0.68
 -1 -6 -1 6.57 0.74
 -1 6 -2 0.23 0.24
 -1 -6 -2 0.34 0.29
 1 -6 2 -0.02 0.17
 1 6 3 -0.05 0.3
 1 -6 3 0.2 0.23
 1 -6 4 1.44 0.34
 1 -6 5 14.35 1.1
 -1 6 -6 1.98 0.22
 1 6 6 1.9 0.17
 -1 6 -7 0.45 0.14
 1 6 7 0.71 0.1
 -1 -6 -7 1.21 0.25
 -1 6 -8 0.06 0.11
 -1 -6 -8 0.24 0.15
 -1 6 -9 0.14 0.12
 -1 -6 -9 0.19 0.14
 -1 6 -10 0.69 0.16
 1 -6 10 0.31 0.15
 -1 -6 -10 0.64 0.17
 1 7 -10 0.4 0.13
 1 -7 -10 0.77 0.18
 1 7 -9 7.3 0.46
 1 -7 -9 7.97 0.48
 1 7 -8 1.2 0.19
 1 -7 -8 1.06 0.23
 1 7 -7 -0.05 0.09
 1 -7 -7 0.16 0.21
 1 7 -6 3.22 0.29
 1 7 -5 11.17 0.56
 -1 7 5 12.46 0.62
 -1 -7 5 11.75 1.12
 -1 7 4 0.11 0.21
 -1 -7 4 -0.1 0.28
 -1 7 3 0.09 0.31
 -1 -7 3 0.66 0.25
 -1 7 2 0.25 0.29
 1 7 -1 7.49 0.82
 -1 7 1 8.22 0.86
 -1 -7 1 9.39 0.93
 -1 7 0 0.29 0.16
 -1 7 0 0.26 0.29
 1 7 0 -0.04 0.21
 1 -7 0 0.16 0.29
 -1 -7 0 0.43 0.29
 1 7 1 9.93 0.86
 -1 7 -1 8.86 0.72
 1 -7 1 9.95 0.96
 1 7 2 3.8 0.63
 1 -7 2 3.77 0.51
 1 7 3 3.7 0.63
 1 -7 3 3.81 0.54
 1 -7 4 1.54 0.42
 1 7 5 19.1 0.88
 1 7 5 21.15 1.17
 -1 7 -5 16.85 0.82
 -1 7 -6 1.31 0.18
 -1 7 -7 4.05 0.35
 -1 -7 -7 5.12 0.48
 -1 7 -8 3.35 0.31
 -1 -7 -8 3.61 0.37
 -1 7 -9 0.49 0.15
 -1 -7 -9 0.45 0.14
 -1 7 -10 0.34 0.12
 -1 -7 -10 0.19 0.14
 1 8 -9 0.02 0.11
 1 -8 -9 -0.05 0.11
 1 8 -8 0.08 0.11
 1 -8 -8 0.3 0.18
 1 8 -7 0.06 0.12
 1 -8 -7 -0.07 0.22
 1 8 -6 0.27 0.11
 1 8 -5 2.45 0.23
 -1 8 5 3.14 0.44
 -1 8 5 2.48 0.27
 -1 8 4 13.93 0.95
 1 8 -4 13 0.58
 -1 8 4 12.81 1.29
 -1 8 4 12.47 0.65
 -1 8 3 0.21 0.29
 -1 8 2 9.87 1.03
 1 8 -1 0.96 0.4
 -1 8 1 0.37 0.35
 1 8 0 1.34 0.45
 -1 8 0 1.08 0.34
 -1 8 -1 7.25 0.82
 1 8 1 6.49 0.83
 1 8 2 2.04 0.46
 1 8 3 0.12 0.3
 1 8 3 0.25 0.23
 1 8 4 0.36 0.29
 1 8 4 0.35 0.12
 1 8 4 0.14 0.23
 1 -8 4 -0.04 0.25
 1 8 5 0.94 0.26
 1 8 5 0.2 0.13
 -1 8 -5 0.02 0.09
 1 8 6 8.7 0.73
 -1 8 -6 7.98 0.45
 -1 8 -7 0.3 0.12
 -1 -8 -7 0.68 0.24
 -1 8 -8 -0.05 0.1
 -1 -8 -8 -0.03 0.15
 -1 8 -9 0.09 0.08
 -1 -8 -9 0.18 0.11
 1 9 -9 -0.04 0.08
 1 -9 -9 0.14 0.11
 1 9 -8 0.37 0.1
 1 -9 -8 0.57 0.19
 1 9 -7 0.87 0.16
 -1 9 6 4.32 0.54
 1 9 -6 5.2 0.33
 -1 9 6 4.64 0.39
 -1 9 5 1.47 0.35
 1 9 -5 1.33 0.16
 -1 9 5 1.27 0.44
 -1 9 5 1.27 0.21
 -1 9 4 1.76 0.52
 1 9 -4 2.28 0.19
 -1 9 4 1.8 0.34
 -1 9 4 2.2 0.24
 -1 9 3 0.31 0.11
 -1 9 3 0.37 0.25
 -1 9 3 0.46 0.31
 -1 9 2 0.23 0.26
 -1 9 2 0.1 0.08
 -1 9 2 0.24 0.32
 1 9 -1 2.77 0.58
 -1 9 1 3.09 0.57
 -1 9 1 2.75 0.43
 -1 9 0 1.53 0.5
 1 9 0 2.06 0.49
 1 9 1 1.07 0.25
 1 9 1 -0.04 0.18
 1 9 2 0.74 0.25
 1 9 2 0.17 0.33
 1 9 2 1 0.13
 1 9 3 1.83 0.48
 1 9 3 1.9 0.22
 1 9 3 1.35 0.35
 1 9 4 17.33 0.82
 1 9 4 16.27 1.14
 1 9 4 17.8 1.44
 1 9 5 5.07 0.4
 1 9 5 4.41 0.57
 -1 9 -5 4.91 0.3
 1 9 6 19.53 0.93
 1 9 6 19.57 1.27
 -1 9 -6 18.46 0.85
 1 9 7 -0.11 0.22
 -1 9 -7 0.08 0.11
 -1 -9 -7 0.33 0.22
 -1 9 -8 0.53 0.13
 -1 -9 -8 0.6 0.17
 -1 9 -9 0.82 0.13
 -1 -9 -9 0.87 0.14
 1 10 -8 1.01 0.15
 1 -10 -8 1.18 0.18
 1 10 -7 0.09 0.07
 -1 10 7 -0.24 0.15
 -1 10 7 -0.01 0.33
 -1 10 6 2.37 0.58
 -1 10 6 2.78 0.29
 -1 10 6 3.46 0.46
 1 10 -6 3.44 0.27
 -1 10 5 1.1 0.44
 1 10 -5 1.29 0.17
 -1 10 5 0.61 0.16
 -1 10 5 0.95 0.26
 1 10 -4 0.64 0.12
 -1 10 4 0.62 0.15
 -1 10 4 0.79 0.42
 -1 10 4 0.59 0.28
 -1 10 3 0.03 0.08
 -1 10 3 0.41 0.33
 -1 10 3 -0.15 0.23
 -1 10 2 -0.02 0.33
 -1 10 2 -0.08 0.08
 -1 10 2 0.11 0.24
 -1 10 1 0.26 0.2
 -1 10 1 0.1 0.08
 1 10 -1 0.03 0.28
 -1 10 1 0.47 0.39
 -1 10 0 8.95 1.08
 1 10 0 8.43 1.04
 1 10 1 0.39 0.12
 1 10 1 0.38 0.41
 1 10 1 0.96 0.31
 1 10 2 4.84 0.6
 1 10 2 5.29 0.33
 1 10 2 3.96 0.73
 1 10 3 13.33 1.32
 1 10 3 11.99 0.63
 1 10 3 12.51 0.94
 1 10 4 0.95 0.27
 1 10 4 1.08 0.45
 1 10 4 0.8 0.17
 1 10 5 4.35 0.73
 -1 10 -5 4.51 0.28
 1 10 5 4.57 0.37
 1 10 5 4.62 0.55
 1 10 6 0.19 0.38
 1 10 6 0.19 0.13
 -1 10 -6 0.4 0.11
 1 10 6 0.44 0.23
 -1 10 -7 0.08 0.08
 1 10 7 0.3 0.37
 -1 -10 -7 -0.08 0.15
 -1 10 -8 0.2 0.08
 -1 -10 -8 0.33 0.59
 -1 -10 -8 -0.03 0.1
 -1 11 7 0 0.09
 1 11 -7 0.01 0.06
 -1 11 7 0.26 0.28
 1 -11 -7 -0.1 0.17
 -1 11 6 0.17 0.14
 -1 11 6 1.04 0.42
 -1 11 6 0.28 0.21
 1 11 -6 0.84 0.12
 -1 11 5 5.13 0.79
 1 11 -5 4.74 0.28
 -1 11 5 4.71 0.34
 -1 11 5 4.2 0.5
 1 11 -4 0.16 0.08
 -1 11 4 0.19 0.22
 -1 11 4 -0.04 0.08
 -1 11 4 0.08 0.34
 -1 11 3 6.48 0.93
 -1 11 3 5.46 0.37
 -1 11 3 5.33 0.62
 -1 11 2 12.48 1.29
 -1 11 2 11.09 0.56
 -1 11 2 11.32 0.88
 -1 11 1 0.33 0.09
 -1 11 1 0.31 0.43
 1 11 -1 0.69 0.35
 -1 11 1 0.4 0.28
 -1 11 0 4.69 0.83
 1 11 0 5.7 0.88
 1 11 1 0.03 0.08
 1 11 1 0.05 0.18
 1 11 1 0.33 0.39
 1 11 2 1.52 0.53
 1 11 2 2.64 0.45
 1 11 2 2.1 0.21
 1 11 3 1.63 0.2
 1 11 3 1.67 0.56
 1 11 3 1.85 0.39
 1 11 4 0.38 0.12
 1 11 4 0.66 0.33
 1 11 4 0.44 0.21
 1 11 5 0.38 0.13
 1 11 5 0.8 0.42
 -1 11 -5 0.45 0.1
 1 11 5 0.24 0.23
 -1 11 -6 0.43 0.09
 1 11 6 0.58 0.25
 1 11 6 0.61 0.42
 1 11 6 -0.03 0.1
 1 11 7 0.23 0.11
 -1 11 -7 0.1 0.07
 1 11 7 0.18 0.43
 -1 -11 -7 0.1 0.14
 -1 12 6 1.22 0.27
 1 12 -6 1.26 0.12
 -1 12 6 1.3 0.17
 -1 12 5 1.11 0.36
 1 12 -5 1.81 0.15
 -1 12 5 1.46 0.32
 -1 12 5 2.04 0.2
 -1 12 4 -0.14 0.18
 -1 12 4 0.01 0.1
 -1 12 4 -0.22 0.35
 -1 12 3 0.49 0.39
 -1 12 3 0.39 0.25
 -1 12 3 0.38 0.11
 -1 12 2 3.79 0.26
 -1 12 2 3.51 0.72
 -1 12 2 3.39 0.49
 -1 12 1 0.49 0.22
 -1 12 1 0.53 0.11
 -1 12 1 1.21 0.49
 1 12 0 0.92 0.48
 1 12 0 0.35 0.1
 1 12 1 4.34 0.8
 1 12 1 3.64 0.25
 1 12 2 5.92 0.61
 1 12 2 7.54 0.98
 1 12 2 5.7 0.35
 1 12 3 1.51 0.44
 1 12 3 0.82 0.29
 1 12 3 1.33 0.18
 1 12 4 0.06 0.2
 1 12 4 -0.03 0.07
 1 12 4 0.12 0.26
 1 12 5 1.94 0.5
 1 12 5 1.28 0.3
 1 12 5 1.69 0.2
 1 12 6 0 0.08
 1 12 6 0.19 0.37
 -1 12 -6 0.08 0.05
 -1 13 5 0.65 0.21
 -1 13 5 0.65 0.11
 -1 13 4 0.05 0.12
 -1 13 4 0.08 0.07
 -1 13 3 0.77 0.13
 -1 13 3 0.6 0.32
 -1 13 3 0.65 0.23
 -1 13 2 0.42 0.23
 -1 13 2 0.35 0.41
 -1 13 2 0.75 0.11
 -1 13 1 0.89 0.12
 -1 13 1 0.93 0.38
 1 13 0 0.49 0.16
 1 13 1 1.45 0.16
 1 13 1 0.13 0.3
 1 13 2 0.16 0.21
 1 13 2 0.31 0.3
 1 13 2 0.07 0.08
 1 13 3 3.2 0.25
 1 13 3 2.74 0.61
 1 13 3 2.5 0.37
 1 13 4 0.15 0.09
 1 13 4 -0.16 0.13
 1 13 5 0.01 0.07
 1 13 5 -0.16 0.35
 -1 14 3 0.33 0.17
 -1 14 3 0.12 0.08
 -1 14 2 0.54 0.09
 1 14 1 4.07 0.28
 1 14 2 1.57 0.19
 1 14 3 0.01 0.1
 -2 0 11 -0.05 0.08
 -2 0 11 -0.01 0.11
 -2 0 10 4.7 0.43
 -2 0 10 5.4 0.38
 2 0 -10 5.93 0.32
 -2 0 10 6.42 0.55
 -2 0 9 0.15 0.18
 -2 0 9 0.08 0.12
 2 0 -9 0.04 0.1
 -2 0 8 0.4 0.18
 2 0 -8 0.16 0.13
 -2 0 7 -0.15 0.28
 -2 0 6 0.28 0.24
 -2 0 6 -0.02 0.15
 -2 0 5 -0.14 0.15
 -2 0 5 0.08 0.15
 -2 0 4 10.04 0.71
 -2 0 4 10.61 0.8
 2 0 -3 0 0.11
 2 0 -3 0.04 0.08
 -2 0 3 -0.06 0.11
 -2 0 3 -0.04 0.09
 -2 0 3 0.19 0.12
 -2 0 2 156.18 7.61
 -2 0 2 155.4 6.68
 -2 0 2 154.86 8.67
 -2 0 2 157.63 8.61
 2 0 -1 0.11 0.07
 -2 0 1 0.31 0.09
 -2 0 1 0.33 0.1
 -2 0 1 0.2 0.08
 2 0 -1 0.07 0.06
 -2 0 1 0.38 0.09
 -2 0 0 29.97 1.29
 -2 0 0 28.5 1.73
 -2 0 -1 0.25 0.1
 -2 0 -1 0.3 0.08
 2 0 1 0.17 0.06
 2 0 1 0.19 0.08
 -2 0 -1 0.1 0.08
 -2 0 -1 0.22 0.08
 -2 0 -2 255.86 12.33
 2 0 2 256.61 10.86
 2 0 2 255.38 14.08
 2 0 2 263.69 12.33
 -2 0 -2 251.28 14.29
 2 0 3 -0.13 0.12
 2 0 3 -0.01 0.11
 -2 0 -3 0.02 0.11
 -2 0 -3 -0.03 0.05
 -2 0 -3 0 0.06
 2 0 4 102.15 4.53
 2 0 4 99.78 5.75
 2 0 5 -0.17 0.17
 2 0 5 -0.03 0.14
 2 0 6 11.12 0.88
 2 0 6 9.63 0.91
 2 0 7 0.09 0.24
 -2 0 -7 0.05 0.13
 -2 0 -8 2.61 0.3
 2 0 8 2.05 0.34
 2 0 8 1.7 0.27
 2 0 9 -0.01 0.17
 -2 0 -9 0.07 0.11
 2 0 9 0.13 0.14
 2 0 10 4.46 0.34
 2 0 10 4.79 0.39
 2 0 11 -0.04 0.08
 2 0 11 -0.16 0.13
 -2 1 11 0.46 0.14
 -2 -1 11 0.35 0.1
 -2 -1 11 0.64 0.21
 -2 -1 11 0.34 0.13
 -2 1 10 2.09 0.25
 -2 1 10 2.81 0.34
 -2 1 10 1.97 0.19
 -2 -1 10 2.31 0.26
 -2 -1 10 1.91 0.27
 2 -1 -10 2.16 0.23
 -2 1 9 -0.02 0.12
 2 1 -9 0.14 0.1
 -2 1 9 0.23 0.13
 -2 1 9 0.28 0.16
 2 -1 -9 0.26 0.14
 -2 -1 9 0.22 0.14
 -2 -1 9 0.36 0.18
 -2 1 8 3.25 0.32
 -2 1 8 3.41 0.4
 2 1 -8 3 0.31
 -2 -1 8 3.47 0.38
 2 -1 -8 3.91 0.39
 2 1 -7 6.04 0.44
 -2 1 7 5.51 0.75
 -2 -1 7 7.54 0.83
 -2 1 6 5.28 0.63
 -2 1 6 5.23 0.61
 -2 -1 6 5.03 0.62
 -2 -1 6 4.46 0.62
 -2 1 5 14.27 1
 -2 1 5 15.34 1.1
 -2 -1 5 15.35 1.15
 -2 -1 5 15.42 1.03
 -2 1 4 0.02 0.15
 2 1 -4 0.21 0.15
 -2 1 4 -0.04 0.14
 2 -1 -4 0.05 0.16
 -2 -1 4 0.09 0.11
 -2 -1 4 0.05 0.12
 -2 1 3 9.26 0.63
 2 1 -3 8.64 0.64
 -2 1 3 10.45 0.74
 -2 1 3 9.57 0.69
 -2 -1 3 10.09 0.64
 -2 -1 3 9.8 0.63
 2 -1 -3 10.13 0.68
 -2 -1 3 9.59 0.71
 -2 1 2 21.01 1.22
 -2 1 2 20.25 1.15
 2 1 -2 17.71 1.1
 -2 1 2 19.49 1.01
 -2 1 2 19.46 1.28
 -2 -1 2 20.74 1.02
 -2 -1 2 20.12 1.14
 2 -1 -2 20.97 1.15
 -2 -1 2 21.32 1.13
 -2 -1 2 20.97 1.22
 2 1 -1 6.84 0.43
 -2 1 1 5.86 0.42
 -2 1 1 5.87 0.47
 -2 1 1 6.02 0.38
 -2 -1 1 5.65 0.39
 2 -1 -1 6.3 0.42
 -2 -1 1 5.91 0.34
 -2 1 0 3.01 0.22
 2 1 0 2.83 0.24
 -2 1 0 2.82 0.24
 2 1 0 3.07 0.19
 -2 1 0 2.92 0.28
 2 1 0 3.11 0.19
 -2 -1 0 2.92 0.28
 -2 -1 0 2.89 0.22
 -2 -1 0 2.97 0.16
 -2 -1 0 2.92 0.26
 2 -1 0 3 0.25
 -2 1 -1 34.92 1.72
 2 1 1 35.39 1.97
 -2 1 -1 31.92 2.05
 2 1 1 35.87 1.51
 -2 1 -1 34.29 1.57
 2 1 1 34.84 1.78
 -2 -1 -1 35.55 1.79
 2 1 2 143.28 6.82
 2 1 2 141.53 7.73
 -2 1 -2 139.55 7.86
 -2 -1 -2 132.88 6.82
 2 -1 2 138.53 6.02
 2 -1 2 142.89 7.71
 2 1 3 53.09 3.08
 -2 1 -3 52.58 3.15
 2 1 3 53.98 2.43
 2 -1 3 53.66 2.47
 -2 -1 -3 54.2 2.71
 2 -1 3 53.98 3.08
 -2 -1 -3 48.76 2.7
 -2 -1 -3 55.71 3.21
 2 1 4 7.92 0.59
 2 1 4 7.43 0.64
 -2 1 -4 7.89 0.69
 2 -1 4 6.76 0.63
 2 -1 4 7.97 0.6
 -2 -1 -4 8 0.72
 -2 -1 -4 7.87 0.55
 2 1 5 1.98 0.37
 2 1 5 3.72 0.44
 2 -1 5 2.25 0.37
 -2 -1 -5 2.51 0.51
 2 -1 5 2.12 0.38
 2 1 6 1.04 0.31
 2 1 6 1.05 0.34
 2 -1 6 1.09 0.33
 2 -1 6 0.6 0.25
 -2 1 -7 1.06 0.19
 2 1 7 0.61 0.38
 -2 -1 -7 1.09 0.21
 2 -1 7 0.96 0.34
 2 1 8 3.3 0.36
 2 1 8 3.04 0.33
 -2 1 -8 2.87 0.29
 -2 -1 -8 2.93 0.34
 2 -1 8 3.14 0.34
 2 1 9 0.01 0.13
 2 1 9 0.06 0.19
 2 1 9 -0.1 0.13
 2 -1 9 -0.04 0.2
 2 -1 9 -0.09 0.14
 -2 -1 -9 0.11 0.12
 2 1 10 1.83 0.18
 2 1 10 1.25 0.2
 2 1 10 1.77 0.28
 2 -1 10 1.41 0.25
 -2 -1 -10 0.96 0.16
 2 -1 10 1.35 0.2
 2 1 11 0.04 0.07
 2 1 11 -0.02 0.1
 2 -1 11 0.08 0.08
 2 -1 11 0.1 0.1
 -2 2 11 0.79 0.14
 -2 -2 11 0.74 0.16
 -2 -2 11 0.57 0.14
 -2 2 10 9.37 0.6
 -2 -2 10 8.53 0.61
 -2 -2 10 8.86 0.53
 2 -2 -10 8.76 0.56
 -2 2 9 0.37 0.14
 -2 2 9 0.43 0.17
 -2 2 9 0.32 0.11
 -2 -2 9 0.44 0.19
 2 -2 -9 0.41 0.17
 2 2 -8 4.76 0.31
 -2 2 8 4.73 0.37
 -2 2 8 5.67 0.52
 -2 2 8 5.5 0.45
 2 -2 -8 5.19 0.38
 2 -2 -8 5.31 0.52
 -2 -2 8 4.15 0.45
 -2 2 7 2.91 0.52
 2 2 -7 2.64 0.26
 -2 -2 7 3.91 0.62
 -2 2 6 2.17 0.4
 -2 -2 6 2.58 0.48
 -2 -2 6 1.84 0.38
 2 -2 -6 0.42 0.54
 -2 2 5 13.26 0.94
 -2 -2 5 14.94 0.98
 -2 -2 5 13.49 1.07
 -2 2 4 57.04 2.79
 -2 -2 4 58.98 3.47
 -2 -2 4 57.79 2.81
 2 -2 -4 62.75 3.19
 -2 2 3 21.58 1.53
 -2 2 3 22.86 1.21
 2 2 -3 24.79 1.3
 -2 -2 3 22.66 1.43
 2 -2 -3 23.64 1.38
 -2 -2 3 23.2 1.23
 -2 -2 3 23.2 1.29
 -2 2 2 4.62 0.47
 -2 2 2 5.18 0.38
 2 -2 -2 4.68 0.42
 -2 -2 2 4.71 0.34
 -2 -2 2 4.58 0.37
 -2 -2 2 4.57 0.29
 -2 2 1 316.12 15.11
 -2 2 1 279.3 13.19
 -2 2 1 303.64 17.36
 2 2 -1 323.51 15.08
 2 -2 -1 322.72 15.11
 -2 -2 1 322.73 13.14
 -2 -2 1 318.15 15.09
 -2 2 0 89.82 4.3
 -2 2 0 86.02 3.76
 -2 2 0 84.24 4.94
 2 2 0 86.48 4.31
 -2 -2 0 87.08 3.65
 2 -2 0 87.24 4.29
 -2 -2 0 85.47 4.31
 2 2 1 981.4 45.9
 -2 2 -1 902.32 40.1
 -2 2 -1 907.96 52.74
 2 -2 1 1000 45.82
 2 -2 1 998.6 45.82
 -2 -2 -1 952.51 45.9
 2 2 2 214.9 11.64
 -2 2 -2 214.76 11.89
 2 2 2 216.85 10.39
 -2 2 -2 205.81 9.1
 2 2 2 209.68 9.01
 2 -2 2 215.92 10.22
 -2 2 -3 106.92 5.8
 2 2 3 101.5 5.67
 2 -2 3 97.02 4.53
 -2 -2 -3 102.11 5.1
 2 -2 3 100.77 5.69
 2 2 4 4.03 0.42
 2 2 4 4.06 0.4
 2 -2 4 4.11 0.44
 -2 -2 -4 4.19 0.46
 2 -2 4 3.91 0.47
 2 2 5 0.03 0.16
 2 2 5 0.14 0.14
 -2 -2 -5 -0.08 0.22
 2 -2 5 -0.24 0.14
 2 -2 5 0.12 0.18
 2 2 6 5.76 0.64
 2 -2 6 5.31 0.67
 2 -2 6 4.93 0.69
 -2 2 -7 0.78 0.14
 -2 -2 -7 0.9 0.21
 2 -2 7 0.88 0.34
 2 2 8 0.91 0.22
 2 2 8 0.91 0.22
 2 2 8 1.03 0.19
 -2 -2 -8 1.35 0.26
 -2 -2 -8 0.89 0.16
 2 2 9 0.78 0.19
 2 2 9 1.18 0.17
 2 2 9 0.88 0.21
 2 -2 9 0.79 0.22
 -2 -2 -9 1.09 0.22
 2 2 10 0.13 0.13
 2 2 10 0.06 0.11
 2 -2 10 0.27 0.14
 -2 -2 -10 0.03 0.1
 2 -2 10 0.31 0.19
 2 2 11 0.13 0.1
 2 -2 11 0.21 0.11
 2 -2 11 0.36 0.11
 -2 3 11 1.49 0.14
 -2 -3 11 1.85 0.2
 -2 -3 11 2.38 0.24
 2 -3 -11 1.86 0.18
 -2 3 10 0.05 0.1
 -2 -3 10 0.39 0.18
 2 -3 -10 0.48 0.17
 -2 -3 10 0.36 0.19
 -2 3 9 0 0.11
 -2 3 9 0.05 0.13
 2 -3 -9 0.17 0.17
 2 -3 -9 0.15 0.13
 -2 -3 9 -0.22 0.17
 -2 3 8 0.85 0.22
 -2 3 8 1.07 0.19
 2 -3 -8 0.74 0.26
 2 -3 -8 1.53 0.23
 -2 3 7 7.41 0.55
 -2 3 7 7.02 0.84
 -2 3 6 1.97 0.41
 -2 -3 6 1.77 0.42
 -2 -3 6 1.46 0.37
 -2 3 5 1.69 0.37
 -2 -3 5 1.86 0.36
 2 -3 -5 1.89 0.43
 -2 -3 5 1.54 0.35
 -2 3 4 20.91 1.2
 2 -3 -4 20.97 1.38
 -2 -3 4 21.71 1.23
 -2 -3 4 20.84 1.39
 -2 3 3 0.34 0.19
 2 3 -3 0.51 0.16
 -2 3 3 0.66 0.21
 -2 -3 3 0.42 0.18
 2 -3 -3 0.6 0.22
 -2 -3 3 0.78 0.16
 2 3 -2 9.08 0.63
 -2 3 2 10.04 0.61
 -2 3 2 9.19 0.8
 -2 -3 2 9.44 0.64
 -2 -3 2 9.23 0.58
 2 -3 -2 8.29 0.67
 2 3 -1 0.03 0.12
 -2 3 1 -0.07 0.11
 -2 3 1 0.24 0.13
 -2 -3 1 0.18 0.09
 2 -3 -1 0.3 0.16
 -2 3 0 12.63 0.71
 2 3 0 13.12 0.83
 -2 3 0 12.37 0.93
 2 -3 0 13.05 0.82
 -2 -3 0 12.73 0.6
 2 -3 0 13.02 0.81
 -2 3 -1 360.52 20.08
 2 3 1 358.74 17.51
 -2 3 -1 368.32 15.3
 2 -3 1 356.78 17.42
 2 -3 1 362.2 17.42
 2 3 2 21.52 1.3
 2 3 2 21.92 1.04
 -2 3 -2 21.52 1.42
 -2 3 -2 21.88 1.15
 2 -3 2 21.95 1.16
 2 -3 2 22.15 1.16
 -2 3 -3 25.47 1.55
 2 3 3 24.13 1.46
 2 3 3 24.35 1.2
 -2 -3 -3 26.58 1.48
 2 -3 3 22.71 1.43
 2 -3 3 22.7 1.29
 2 3 4 5.24 0.47
 2 -3 4 5.12 0.54
 2 -3 4 5.21 0.49
 -2 -3 -4 5.55 0.6
 2 3 5 4.38 0.5
 2 -3 5 4.12 0.54
 2 -3 5 3.92 0.53
 2 -3 6 0.08 0.26
 2 -3 6 0.42 0.28
 2 3 7 0.01 0.16
 -2 -3 -7 -0.15 0.12
 2 3 8 1.8 0.25
 2 3 8 1.35 0.26
 -2 -3 -8 1.56 0.22
 -2 -3 -8 1.57 0.31
 2 3 9 -0.04 0.11
 2 3 9 0.2 0.14
 2 -3 9 -0.05 0.16
 -2 -3 -9 0 0.16
 2 3 10 4.2 0.36
 2 -3 10 4.3 0.41
 -2 -3 -10 3.13 0.33
 2 -3 10 3.88 0.36
 2 3 11 0.08 0.08
 2 -3 11 -0.07 0.08
 2 -3 11 0 0.09
 -2 -4 11 4.37 0.34
 -2 -4 11 4.27 0.31
 -2 4 10 4.81 0.31
 2 -4 -10 4.72 0.43
 -2 -4 10 4.49 0.39
 -2 4 9 2.55 0.29
 -2 -4 9 2.52 0.35
 2 -4 -9 2.67 0.36
 2 -4 -9 2.32 0.25
 -2 4 8 0.02 0.13
 2 -4 -8 0.7 0.2
 -2 4 7 -0.02 0.12
 2 -4 -7 0.07 0.18
 -2 4 6 -0.08 0.29
 -2 -4 6 0.11 0.22
 -2 4 5 2.56 0.46
 -2 -4 5 2.5 0.46
 -2 -4 5 2.61 0.43
 -2 4 4 5.52 0.58
 2 -4 -4 5.3 0.68
 -2 -4 4 5.63 0.58
 -2 4 3 11.74 0.75
 2 4 -3 10.37 0.75
 -2 4 3 11.22 1
 -2 -4 3 11.2 0.74
 2 -4 -3 9.23 0.82
 -2 4 2 -0.02 0.09
 -2 4 2 0.03 0.19
 2 4 -2 0.18 0.12
 -2 -4 2 -0.09 0.11
 2 -4 -2 0.04 0.12
 -2 4 1 2.17 0.29
 2 4 -1 2.14 0.33
 -2 4 1 1.81 0.38
 -2 -4 1 2.25 0.23
 2 -4 -1 1.56 0.28
 2 4 0 3.17 0.41
 -2 4 0 4.26 0.38
 -2 4 0 3.75 0.49
 -2 -4 0 4.07 0.26
 2 -4 0 3.58 0.4
 -2 4 -1 135.07 5.87
 2 4 1 131.66 6.74
 -2 4 -1 138.43 7.69
 2 4 1 132.74 5.68
 2 -4 1 137.24 6.65
 -2 -4 -1 131.25 7.33
 2 4 2 1.36 0.31
 -2 4 -2 1.76 0.32
 -2 4 -2 1.52 0.25
 2 4 2 1.33 0.16
 2 -4 2 1.25 0.2
 2 -4 3 5.82 0.55
 -2 -4 -3 4.53 0.57
 -2 -4 -4 23.09 1.54
 2 -4 4 23.71 1.38
 2 -4 5 13.67 1.01
 2 -4 6 0.03 0.29
 2 4 7 0.13 0.13
 2 4 7 0.07 0.15
 -2 4 -7 0.46 0.13
 -2 -4 -7 0.26 0.18
 2 4 8 1.6 0.25
 2 4 8 1.4 0.17
 -2 -4 -8 1.64 0.24
 2 4 9 1.17 0.19
 -2 -4 -9 1.04 0.17
 -2 -4 -9 0.93 0.25
 2 4 10 0.11 0.09
 2 -4 10 0.19 0.14
 -2 -4 -10 -0.15 0.11
 2 -4 11 0.23 0.12
 -2 -4 -11 0.03 0.08
 2 -4 11 0.18 0.11
 -2 -5 11 0.45 0.11
 -2 -5 11 0.26 0.12
 2 -5 -11 0.07 0.09
 2 -5 -10 0.46 0.17
 -2 -5 10 0.66 0.18
 -2 5 9 0.01 0.07
 2 -5 -9 0 0.11
 -2 5 8 2.29 0.24
 2 5 -8 2.27 0.27
 2 -5 -8 2.13 0.29
 -2 5 7 0.08 0.11
 2 5 -7 -0.05 0.11
 2 -5 -7 0.33 0.21
 -2 5 6 0.3 0.11
 2 5 -6 0.6 0.13
 -2 -5 6 -0.19 0.24
 -2 5 5 -0.06 0.26
 -2 -5 5 0.01 0.17
 -2 5 4 8.79 0.77
 -2 5 4 8.78 0.87
 -2 -5 4 6.84 0.69
 -2 5 3 43.61 2.17
 -2 -5 3 42.23 2.13
 2 -5 -3 42.84 2.54
 -2 5 2 10.7 1
 2 5 -2 11.4 0.82
 -2 5 2 9.84 0.72
 -2 -5 2 10.17 0.66
 2 -5 -2 10.24 0.86
 -2 5 1 -0.38 0.16
 2 5 -1 0.01 0.16
 -2 5 1 0.09 0.13
 -2 -5 1 0.03 0.09
 2 -5 -1 -0.03 0.11
 -2 5 0 0.07 0.2
 2 5 0 0.31 0.17
 -2 5 0 0.14 0.11
 2 -5 0 0.32 0.16
 2 5 1 2.68 0.42
 -2 5 -1 3.08 0.48
 -2 5 -1 2.35 0.32
 2 -5 1 2.09 0.32
 2 5 2 12.71 0.98
 -2 5 -2 12.08 1
 -2 5 -2 12.07 0.81
 2 -5 2 11.73 0.82
 2 -5 3 2.05 0.34
 -2 -5 -3 2.04 0.4
 2 -5 4 3.46 0.5
 -2 -5 -4 3.03 0.55
 2 -5 5 16.35 1.19
 -2 5 -6 0.07 0.1
 2 5 6 0.07 0.13
 -2 -5 -6 0.13 0.37
 2 -5 6 0.29 0.35
 -2 5 -7 0.71 0.17
 2 5 7 0.54 0.15
 -2 -5 -7 0.77 0.24
 -2 5 -8 0.27 0.14
 2 5 8 0.11 0.13
 -2 -5 -8 0.28 0.16
 2 5 9 2.09 0.2
 -2 -5 -9 2.82 0.26
 -2 -5 -9 2.84 0.36
 2 -5 10 0.53 0.17
 -2 -5 -10 0.44 0.16
 2 -5 11 0 0.11
 -2 -5 -11 0.18 0.09
 2 -5 11 0.03 0.1
 -2 -6 10 0.18 0.18
 2 -6 -10 0.31 0.17
 2 6 -9 0.46 0.15
 2 -6 -9 0.3 0.13
 2 6 -8 5.82 0.4
 2 -6 -8 5.6 0.48
 2 6 -7 5.63 0.39
 2 -6 -7 6.32 0.54
 2 6 -6 3.18 0.29
 -2 -6 5 0.43 0.27
 -2 6 4 12.25 1.03
 -2 -6 4 13.34 0.95
 -2 6 3 3.89 0.61
 -2 6 3 3.61 0.47
 -2 -6 3 3.64 0.45
 -2 6 2 5.35 0.8
 -2 6 2 5.97 0.57
 2 6 -2 6.76 0.7
 2 -6 -2 4.98 0.67
 -2 -6 2 5.41 0.52
 -2 6 1 2.82 0.37
 -2 6 1 2.1 0.47
 2 6 -1 1.8 0.37
 2 -6 -1 2.65 0.44
 -2 6 0 1.35 0.42
 -2 6 0 1.99 0.31
 2 6 0 1.54 0.35
 2 -6 0 2.19 0.41
 -2 6 -1 5.28 0.71
 2 6 1 4.95 0.64
 -2 6 -1 6.02 0.56
 2 -6 1 4.58 0.57
 2 6 2 1.15 0.33
 -2 6 -2 1.28 0.28
 -2 6 -2 1.31 0.37
 -2 -6 -2 0.94 0.36
 2 6 3 0.55 0.27
 2 -6 3 0.86 0.24
 2 -6 4 18.26 1.23
 2 -6 5 0.08 0.33
 -2 6 -6 0.37 0.12
 2 6 6 0.26 0.1
 2 6 7 1.24 0.14
 -2 6 -7 1.51 0.22
 -2 -6 -7 2.39 0.33
 -2 6 -8 11.48 0.63
 -2 -6 -8 11.35 0.68
 -2 6 -9 0.47 0.15
 -2 -6 -9 0.59 0.14
 -2 6 -10 0.83 0.18
 -2 -6 -10 1 0.21
 2 -6 10 1.35 0.24
 2 7 -10 0.12 0.09
 2 -7 -10 -0.12 0.12
 -2 -7 10 -0.01 0.13
 2 7 -9 0.52 0.14
 2 -7 -9 0.81 0.16
 2 7 -8 0.96 0.18
 2 -7 -8 0.91 0.21
 2 7 -7 1.45 0.21
 2 -7 -7 1.51 0.3
 2 7 -6 0.26 0.11
 2 7 -5 7.53 0.42
 -2 7 5 7.62 0.45
 -2 7 4 1.04 0.34
 -2 7 3 0.43 0.26
 2 7 -2 4.4 0.65
 -2 7 2 4.43 0.64
 -2 7 1 8.03 0.88
 -2 7 1 8.1 0.73
 2 7 -1 8.82 0.88
 2 7 -1 7.72 0.87
 -2 7 1 7.67 1
 -2 7 0 4.62 0.65
 2 7 0 4.63 0.65
 -2 7 0 5.33 0.57
 -2 7 0 4.53 0.75
 2 -7 0 4.57 0.64
 -2 7 -1 -0.05 0.19
 -2 7 -1 0.05 0.27
 2 7 1 0.26 0.22
 2 -7 1 0.03 0.2
 2 7 2 28.57 1.82
 2 -7 2 28.4 1.63
 2 7 3 0.5 0.34
 2 -7 3 0.72 0.34
 2 -7 4 0.07 0.2
 2 7 5 1.96 0.27
 -2 7 -5 1.04 0.16
 -2 7 -6 12.25 0.62
 -2 7 -7 2.65 0.28
 -2 -7 -7 2.98 0.38
 -2 7 -8 0.2 0.12
 -2 -7 -8 0.12 0.15
 -2 7 -9 3.74 0.31
 -2 -7 -9 2.92 0.28
 -2 7 -10 0.06 0.09
 -2 -7 -10 0.04 0.13
 2 8 -9 -0.11 0.07
 2 -8 -9 -0.05 0.1
 2 8 -8 0.89 0.16
 2 -8 -8 1.48 0.24
 2 8 -7 2.62 0.26
 2 -8 -7 2.83 0.38
 2 8 -6 0.02 0.09
 -2 8 5 5.45 0.55
 -2 8 5 4.03 0.36
 2 8 -5 4.28 0.3
 -2 8 4 8.75 0.71
 2 8 -4 8.01 0.4
 -2 8 4 7.4 0.45
 -2 8 4 8.5 1
 -2 8 3 4.02 0.69
 -2 8 3 3.88 0.49
 -2 8 2 2.12 0.51
 2 8 -2 1.75 0.5
 2 8 -1 7.58 0.86
 -2 8 1 6.65 0.85
 -2 8 0 3.97 0.66
 2 8 0 3.74 0.6
 2 8 1 0.06 0.29
 2 8 2 1.08 0.4
 2 -8 2 0.97 0.35
 2 8 3 2.51 0.55
 2 8 3 2.29 0.39
 2 -8 3 2.75 0.54
 2 8 4 3.79 0.32
 2 8 4 3.63 0.5
 -2 8 -5 1.53 0.18
 2 8 5 1.32 0.31
 2 8 5 1.54 0.23
 2 8 6 0.05 0.17
 -2 8 -6 0.08 0.08
 -2 8 -7 1.16 0.18
 -2 -8 -7 1.28 0.28
 -2 8 -8 1.41 0.19
 -2 -8 -8 0.93 0.2
 -2 8 -9 3.12 0.26
 -2 -8 -9 2.51 0.24
 2 9 -9 -0.02 0.07
 2 -9 -9 -0.01 0.1
 2 9 -8 2.53 0.24
 2 -9 -8 2.6 0.29
 2 9 -7 1.2 0.17
 -2 9 6 0.99 0.26
 2 9 -6 1.27 0.19
 -2 9 6 1.18 0.2
 -2 9 5 0.16 0.18
 2 9 -5 0.29 0.12
 -2 9 5 0.16 0.12
 -2 9 5 0.07 0.26
 -2 9 4 0.9 0.16
 -2 9 4 1.04 0.31
 -2 9 4 0.88 0.42
 2 9 -4 0.61 0.12
 -2 9 3 1.9 0.21
 -2 9 3 1.5 0.34
 -2 9 3 2.27 0.55
 -2 9 2 0.08 0.34
 -2 9 2 0.25 0.11
 -2 9 2 0.22 0.24
 -2 9 1 2.38 0.58
 -2 9 1 1.91 0.4
 2 9 -1 2.75 0.61
 -2 9 0 13.78 1.15
 -2 9 0 13.69 0.95
 2 9 0 14.29 1.2
 2 9 1 0.4 0.36
 2 9 1 1.71 0.34
 2 9 2 0.27 0.37
 2 9 2 -0.11 0.23
 2 9 2 -0.04 0.08
 2 9 3 1.44 0.36
 2 9 3 1.37 0.2
 2 9 3 1.11 0.4
 2 9 4 1.53 0.21
 2 9 4 1.02 0.29
 2 9 5 1.23 0.3
 -2 9 -5 1.76 0.18
 2 9 5 1.39 0.22
 -2 9 -6 0.46 0.12
 2 9 6 0.18 0.22
 -2 9 -7 0.27 0.1
 2 9 7 0.16 0.39
 -2 -9 -7 0.47 0.2
 -2 9 -8 1.1 0.15
 -2 -9 -8 -0.03 0.65
 -2 -9 -8 1 0.2
 -2 9 -9 -0.02 0.07
 -2 -9 -9 0.09 0.1
 2 10 -8 2.76 0.23
 2 -10 -8 2.81 0.28
 -2 10 7 0.01 0.16
 -2 10 7 -0.08 0.21
 2 10 -7 0.12 0.08
 -2 10 7 0.17 0.12
 -2 10 6 0.6 0.21
 -2 10 6 0.28 0.35
 -2 10 6 0.8 0.17
 2 10 -6 0.54 0.12
 -2 10 5 1.22 0.32
 2 10 -5 1.21 0.17
 -2 10 5 1.24 0.19
 -2 10 5 1.47 0.51
 2 10 -4 4.42 0.27
 -2 10 4 4.17 0.56
 -2 10 4 4.29 0.35
 -2 10 4 3.7 0.72
 -2 10 3 0.06 0.32
 -2 10 3 -0.1 0.09
 -2 10 3 -0.01 0.2
 -2 10 2 0.98 0.34
 -2 10 2 1.19 0.16
 -2 10 2 0.36 0.37
 -2 10 1 5.75 0.32
 -2 10 1 5.73 0.63
 -2 10 1 6.74 0.95
 2 10 -1 5.73 0.85
 -2 10 0 11.13 0.87
 2 10 0 13.17 1.3
 -2 10 0 13.73 1.29
 2 10 0 10.77 0.52
 2 10 1 2.38 0.22
 2 10 1 2.66 0.57
 2 10 1 2.88 0.47
 2 10 2 2.77 0.6
 2 10 2 3.04 0.26
 2 10 2 3.01 0.48
 2 10 3 0.01 0.35
 2 10 3 0.01 0.08
 2 10 3 -0.1 0.15
 2 10 4 0.74 0.18
 2 10 4 0.89 0.47
 2 10 4 1.06 0.29
 2 10 5 3.79 0.72
 2 10 5 2.49 0.44
 -2 10 -5 2.79 0.23
 2 10 5 2.66 0.28
 2 10 6 0.24 0.23
 -2 10 -6 0.15 0.08
 2 10 6 0.21 0.12
 -2 10 -7 0.14 0.09
 2 10 7 0.18 0.46
 -2 -10 -7 0.25 0.18
 -2 10 -8 0.39 0.09
 -2 -10 -8 1.26 0.71
 -2 -10 -8 0.34 0.15
 -2 11 7 -0.28 0.16
 -2 11 7 0.09 0.1
 2 11 -7 0.23 0.08
 2 -11 -7 0.14 0.15
 -2 11 6 1.78 0.3
 2 11 -6 2.29 0.19
 -2 11 6 1.27 0.45
 -2 11 6 1.92 0.22
 -2 11 5 0.28 0.25
 -2 11 5 0.34 0.21
 -2 11 5 0.27 0.12
 2 11 -5 0.45 0.12
 -2 11 4 0.26 0.12
 2 11 -4 0.6 0.11
 -2 11 4 0.5 0.43
 -2 11 4 0.14 0.22
 -2 11 3 0.59 0.29
 2 11 -3 1.46 0.15
 -2 11 3 1.06 0.17
 -2 11 3 1.24 0.43
 -2 11 2 0 0.37
 -2 11 2 0.22 0.25
 -2 11 2 -0.07 0.08
 -2 11 1 4.5 0.28
 2 11 -1 5.26 0.86
 -2 11 1 4.5 0.54
 -2 11 1 3.45 0.67
 -2 11 0 2.22 0.61
 2 11 0 1.54 0.58
 2 11 0 2.26 0.2
 2 11 1 3.64 0.72
 2 11 1 3.7 0.28
 2 11 2 0.01 0.1
 2 11 2 0.32 0.28
 2 11 2 0.36 0.28
 2 11 3 5.18 0.86
 2 11 3 4.42 0.55
 2 11 3 4.38 0.31
 2 11 4 7.11 0.7
 2 11 4 6.44 0.41
 2 11 4 6.23 0.91
 2 11 5 0.69 0.15
 2 11 5 0.36 0.36
 2 11 5 0.47 0.24
 -2 11 -5 0.36 0.08
 2 11 6 -0.01 0.09
 2 11 6 0.45 0.36
 -2 11 -6 0.07 0.08
 2 11 6 0.19 0.26
 -2 11 -7 0.2 0.07
 2 11 7 0.03 0.31
 -2 -11 -7 -0.12 0.16
 2 12 -6 0.01 0.05
 -2 12 6 -0.04 0.07
 -2 12 6 -0.02 0.13
 2 12 -5 0.73 0.1
 -2 12 5 0.95 0.15
 -2 12 5 0.52 0.24
 -2 12 5 0.07 0.34
 -2 12 4 0.01 0.39
 2 12 -4 0.02 0.07
 -2 12 4 -0.1 0.08
 -2 12 4 -0.06 0.12
 -2 12 3 0.12 0.19
 -2 12 3 0.12 0.1
 -2 12 3 0.09 0.35
 -2 12 2 2.23 0.6
 -2 12 2 2.17 0.22
 -2 12 2 2.64 0.43
 -2 12 1 1.07 0.14
 -2 12 1 0.29 0.48
 2 12 -1 1.07 0.23
 -2 12 1 0.51 0.28
 2 12 0 2.06 0.2
 2 12 0 1.69 0.56
 2 12 1 3.02 0.24
 2 12 1 1.64 0.59
 2 12 2 0.46 0.43
 2 12 2 0.24 0.09
 2 12 2 0.32 0.24
 2 12 3 0.4 0.31
 2 12 3 0.92 0.15
 2 12 3 1.01 0.3
 2 12 4 1.12 0.3
 2 12 4 1.7 0.2
 2 12 4 1.24 0.4
 2 12 5 3.45 0.29
 2 12 5 3.7 0.5
 2 12 6 -0.16 0.44
 2 12 6 -0.06 0.08
 -2 12 -6 0.15 0.06
 -2 13 5 0.15 0.08
 -2 13 5 0.33 0.19
 -2 13 4 0.7 0.12
 -2 13 4 0.63 0.22
 -2 13 3 0.15 0.27
 -2 13 3 -0.13 0.16
 -2 13 3 0.13 0.09
 -2 13 2 1.53 0.16
 -2 13 2 1.6 0.31
 -2 13 2 1.32 0.47
 -2 13 1 6.72 0.34
 2 13 0 -0.01 0.21
 2 13 0 -0.15 0.48
 2 13 1 1.75 0.18
 2 13 1 1.17 0.48
 2 13 2 1.75 0.18
 2 13 2 1.58 0.51
 2 13 3 0.54 0.28
 2 13 3 1.01 0.42
 2 13 3 1.01 0.15
 2 13 4 2.4 0.46
 2 13 4 2.1 0.21
 2 13 5 0.03 0.44
 2 13 5 0.28 0.12
 -2 14 3 0.87 0.1
 -2 14 3 0.5 0.2
 -2 14 2 0.29 0.07
 2 14 1 1.14 0.19
 2 14 1 1.57 0.2
 2 14 2 0.29 0.19
 2 14 3 0.22 0.16
 -3 0 11 -0.01 0.12
 -3 0 11 0 0.08
 -3 0 10 0.27 0.17
 -3 0 10 0.2 0.12
 -3 0 10 0.1 0.13
 3 0 -10 0.11 0.07
 -3 0 9 -0.16 0.16
 -3 0 9 0.02 0.12
 3 0 -9 0.11 0.13
 -3 0 8 1.12 0.21
 3 0 -8 0.36 0.15
 -3 0 7 0.09 0.22
 3 0 -7 -0.06 0.09
 -3 0 6 1.11 0.31
 -3 0 6 0.65 0.32
 -3 0 5 0.03 0.2
 -3 0 5 -0.05 0.14
 -3 0 4 0.95 0.21
 3 0 -4 0.28 0.31
 -3 0 4 1.09 0.24
 3 0 -4 -0.11 0.1
 -3 0 3 -0.05 0.13
 -3 0 3 0.01 0.08
 -3 0 3 0.1 0.11
 3 0 -3 -0.02 0.09
 3 0 -3 -0.04 0.11
 -3 0 2 54.41 2.47
 -3 0 2 53.61 3.14
 -3 0 2 56.96 2.83
 -3 0 2 54.38 3.12
 -3 0 1 -0.02 0.08
 3 0 -1 -0.05 0.08
 -3 0 1 0.05 0.06
 3 0 -1 0.02 0.07
 -3 0 1 0 0.07
 3 0 0 13.97 0.99
 3 0 0 18.81 0.94
 -3 0 -1 0 0.08
 3 0 1 -0.03 0.05
 -3 0 -1 0 0.06
 3 0 1 -0.08 0.08
 -3 0 -1 -0.03 0.1
 -3 0 -2 232.59 12.68
 3 0 2 275.92 12.69
 3 0 2 272.19 14.47
 3 0 2 272.85 11.16
 -3 0 -3 0.03 0.07
 3 0 3 0.07 0.07
 3 0 3 0.04 0.12
 -3 0 -3 0 0.12
 3 0 3 -0.1 0.1
 3 0 4 0.37 0.18
 3 0 4 0.1 0.12
 -3 0 -4 0.12 0.27
 3 0 5 0.16 0.18
 3 0 5 -0.07 0.18
 3 0 6 0.86 0.31
 3 0 6 0.9 0.28
 -3 0 -7 0.1 0.13
 3 0 7 0.1 0.23
 3 0 8 -0.12 0.22
 -3 0 -8 0.15 0.13
 3 0 8 -0.14 0.17
 -3 0 -9 0.06 0.1
 3 0 9 -0.1 0.12
 3 0 9 -0.18 0.16
 3 0 10 1.47 0.2
 3 0 10 1.53 0.23
 3 0 11 -0.03 0.12
 3 0 11 0 0.07
 -3 1 11 0.13 0.13
 -3 -1 11 0.07 0.08
 -3 -1 11 -0.01 0.08
 -3 -1 11 0.03 0.14
 -3 1 10 0.64 0.17
 -3 1 10 0.74 0.19
 -3 -1 10 0.67 0.16
 -3 -1 10 0.55 0.17
 3 -1 -10 0.47 0.14
 -3 1 9 1.13 0.27
 3 1 -9 0.95 0.15
 -3 1 9 1.26 0.22
 -3 1 9 1.02 0.2
 3 -1 -9 0.92 0.2
 -3 -1 9 1.05 0.21
 3 1 -8 -0.05 0.12
 -3 1 8 -0.05 0.13
 -3 1 8 -0.18 0.19
 3 -1 -8 -0.19 0.15
 -3 -1 8 -0.31 0.16
 3 1 -7 1.41 0.22
 -3 1 7 1.56 0.41
 -3 -1 7 1 0.43
 -3 1 6 11.26 0.92
 -3 -1 6 12.16 0.97
 -3 -1 6 12.53 1.06
 -3 1 5 0.25 0.16
 -3 1 5 0.16 0.21
 3 -1 -5 -0.1 0.28
 -3 -1 5 0.23 0.17
 -3 -1 5 0.43 0.19
 3 1 -4 0.79 0.26
 -3 1 4 0.23 0.16
 -3 1 4 0.44 0.19
 3 -1 -4 0.38 0.22
 -3 -1 4 0.26 0.16
 3 -1 -4 0.31 0.21
 -3 -1 4 0.38 0.16
 -3 1 3 3.46 0.37
 3 1 -3 3.54 0.4
 -3 1 3 3.61 0.35
 -3 1 3 3.08 0.34
 -3 -1 3 3.69 0.37
 3 -1 -3 3.22 0.38
 -3 -1 3 2.98 0.36
 3 1 -2 16.63 0.92
 3 1 -2 16.19 0.98
 3 1 -2 15.25 0.91
 -3 1 2 15.57 1.05
 -3 1 2 15.34 0.85
 -3 -1 2 16.12 0.97
 -3 -1 2 16.4 1.01
 -3 -1 2 15.56 0.83
 -3 -1 2 15.12 0.95
 3 -1 -2 15.78 0.97
 -3 1 1 3.56 0.28
 3 1 -1 3.31 0.24
 3 1 -1 3.75 0.32
 3 1 -1 3.62 0.25
 -3 1 1 3.17 0.37
 -3 1 1 3.16 0.33
 -3 -1 1 3.59 0.26
 -3 -1 1 3.43 0.29
 3 -1 -1 3.05 0.33
 -3 -1 1 2.75 0.33
 3 1 0 26.04 1.47
 -3 1 0 24.89 1.59
 -3 1 0 25.98 1.38
 -3 1 0 24.08 1.2
 3 1 0 26.68 1.48
 3 1 0 25.94 1.39
 -3 -1 0 26.19 1.6
 -3 -1 0 25.29 1.13
 -3 -1 0 25.32 1.4
 3 -1 0 26.63 1.38
 3 1 1 4.44 0.33
 -3 1 -1 4.39 0.31
 -3 1 -1 3.95 0.4
 3 1 1 4.24 0.34
 -3 1 -1 4.22 0.3
 -3 -1 -1 3.99 0.43
 -3 -1 -1 3.95 0.35
 -3 -1 -1 4.08 0.24
 3 1 2 0.38 0.13
 -3 1 -2 0.39 0.08
 -3 1 -2 0.53 0.22
 3 1 2 0.5 0.12
 3 1 2 0.43 0.14
 -3 1 -2 0.51 0.13
 3 -1 2 0.27 0.12
 3 -1 2 0.61 0.08
 -3 -1 -2 0.62 0.2
 -3 -1 -2 0.39 0.14
 3 1 3 2.18 0.26
 3 1 3 2.13 0.3
 -3 1 -3 2.46 0.39
 3 1 3 2.13 0.26
 3 -1 3 2.47 0.31
 -3 -1 -3 2.19 0.28
 3 -1 3 2.38 0.3
 -3 -1 -3 2.09 0.36
 3 1 4 -0.04 0.09
 -3 1 -4 0.11 0.18
 3 1 4 0.12 0.13
 3 -1 4 -0.17 0.14
 -3 -1 -4 -0.11 0.21
 3 -1 4 0.14 0.15
 3 1 5 0.17 0.19
 3 1 5 -0.01 0.15
 3 -1 5 0.04 0.2
 -3 -1 -5 0.2 0.36
 3 -1 5 0.19 0.16
 3 1 6 0.55 0.27
 3 1 6 0.46 0.23
 3 -1 6 0.23 0.24
 3 -1 6 0.3 0.21
 -3 1 -7 0.54 0.16
 3 -1 7 0.35 0.25
 -3 -1 -7 0.24 0.17
 3 1 8 0.3 0.21
 -3 1 -8 0.03 0.1
 3 1 8 0.1 0.15
 3 -1 8 -0.28 0.17
 -3 -1 -8 0.17 0.14
 3 1 9 0.07 0.16
 3 1 9 0.35 0.14
 3 1 9 0.1 0.16
 3 -1 9 0.37 0.17
 3 -1 9 0.14 0.18
 -3 -1 -9 0.11 0.12
 3 1 10 1.2 0.19
 3 1 10 1.58 0.24
 3 1 10 1.42 0.17
 3 -1 10 1.54 0.21
 3 -1 10 1.42 0.24
 -3 -1 -10 0.99 0.15
 3 1 11 0.92 0.16
 3 -1 11 0.78 0.14
 3 -1 11 1.38 0.21
 3 -1 11 0.7 0.12
 -3 2 11 0.51 0.12
 -3 -2 11 0.57 0.15
 -3 -2 11 0.79 0.13
 -3 2 10 0.57 0.18
 -3 2 10 0.51 0.12
 -3 -2 10 0.3 0.14
 3 -2 -10 0.33 0.14
 -3 -2 10 0.45 0.19
 -3 2 9 15.83 0.95
 -3 2 9 15.19 0.87
 3 -2 -9 16.79 0.96
 -3 -2 9 17.75 0.91
 -3 2 8 7.5 0.53
 3 2 -8 7.59 0.41
 -3 2 8 7.23 0.55
 -3 2 8 6.46 0.45
 3 -2 -8 7.15 0.57
 3 -2 -8 7.22 0.45
 -3 -2 8 7.36 0.56
 3 2 -7 1.27 0.19
 -3 2 7 1.48 0.41
 -3 2 7 1.32 0.25
 -3 -2 7 1.35 0.39
 -3 2 6 33.53 1.95
 -3 -2 6 35.17 1.98
 -3 -2 6 33.79 2.29
 -3 2 5 0.17 0.23
 -3 -2 5 0.22 0.16
 3 -2 -5 -0.01 0.27
 -3 -2 5 0.4 0.25
 3 2 -4 96 4.82
 -3 2 4 91.96 4.33
 -3 -2 4 96.13 4.35
 3 -2 -4 99.37 4.96
 -3 -2 4 93.53 5.46
 -3 2 3 21.22 1.12
 3 2 -3 17.91 1.17
 -3 2 3 21.1 1.41
 -3 -2 3 20.8 1.3
 -3 -2 3 21.19 1.11
 3 -2 -3 20.27 1.27
 -3 2 2 2.39 0.34
 3 2 -2 2.68 0.3
 -3 2 2 2.64 0.31
 -3 -2 2 2.26 0.24
 -3 -2 2 2.29 0.25
 3 -2 -2 2.18 0.33
 -3 -2 2 2.28 0.22
 3 2 -1 0.99 0.18
 -3 2 1 1.12 0.2
 -3 2 1 0.94 0.24
 -3 -2 1 0.93 0.13
 3 -2 -1 0.93 0.19
 -3 -2 1 0.87 0.18
 -3 -2 1 1.05 0.14
 -3 -2 1 1.01 0.19
 -3 2 0 0.23 0.18
 -3 2 0 0.43 0.13
 -3 2 0 0.23 0.13
 3 2 0 0.49 0.14
 -3 -2 0 0.42 0.05
 -3 -2 0 0.26 0.09
 -3 -2 0 0.54 0.16
 3 -2 0 0.35 0.11
 -3 2 -1 57.22 2.57
 -3 2 -1 57.23 2.85
 -3 2 -1 55.83 3.35
 3 2 1 56.34 2.92
 3 -2 1 57.06 2.85
 3 2 2 357.99 19.17
 3 2 2 337.81 14.74
 -3 2 -2 358.5 19.52
 -3 2 -2 339.6 14.87
 3 2 2 349.03 16.99
 3 -2 2 361.82 16.84
 3 2 3 41.04 2.3
 3 2 3 43.76 2.49
 -3 2 -3 44.73 2.63
 3 2 3 41.66 1.97
 3 -2 3 43.01 2.51
 3 -2 3 43.01 2.08
 3 2 4 1.94 0.29
 3 2 4 3.24 0.37
 -3 -2 -4 2.83 0.36
 3 -2 4 3.11 0.4
 -3 -2 -4 2.53 0.48
 3 -2 4 2.4 0.37
 3 2 5 32.46 1.72
 3 2 5 33.52 2.02
 3 -2 5 30.38 1.77
 3 -2 5 31.83 2.11
 3 -2 6 1.02 0.36
 3 -2 6 1.14 0.32
 3 2 7 13.18 0.81
 -3 2 -7 12.16 0.64
 3 -2 7 12.02 1.14
 -3 -2 -7 13.15 0.79
 3 2 8 0.74 0.2
 3 2 8 0.98 0.21
 3 2 8 1.06 0.18
 3 -2 8 1.31 0.28
 -3 -2 -8 0.61 0.2
 -3 -2 -8 1 0.17
 3 2 9 0.16 0.11
 3 2 9 0.19 0.13
 3 2 9 0.52 0.19
 -3 -2 -9 0.26 0.16
 3 -2 9 0.32 0.18
 3 2 10 1.82 0.25
 3 2 10 1.89 0.21
 3 -2 10 1.94 0.28
 -3 -2 -10 1.98 0.24
 3 -2 10 1.99 0.25
 3 2 11 1.56 0.2
 3 -2 11 1.85 0.21
 3 -2 11 1.95 0.19
 -3 -3 11 1.25 0.17
 -3 -3 11 1.3 0.19
 3 -3 -11 1.31 0.15
 -3 3 10 7.62 0.49
 -3 -3 10 7.29 0.56
 3 -3 -10 7.03 0.51
 -3 -3 10 7.8 0.5
 -3 3 9 1.11 0.15
 -3 3 9 1.59 0.25
 3 -3 -9 1.39 0.18
 3 -3 -9 0.95 0.24
 -3 -3 9 1.21 0.25
 -3 3 8 20.83 1.11
 -3 3 8 19.2 1.01
 3 -3 -8 19.03 1.14
 3 -3 -8 20.19 0.99
 -3 3 7 0.22 0.11
 3 -3 -7 0.34 0.18
 -3 3 6 8.59 0.88
 -3 -3 6 9.66 0.93
 -3 3 5 2.39 0.41
 -3 -3 5 2.75 0.45
 3 -3 -5 2.62 0.53
 -3 -3 5 2.64 0.42
 -3 3 4 7.42 0.69
 3 -3 -4 8.76 0.78
 -3 -3 4 8.75 0.67
 -3 -3 4 8.12 0.69
 -3 3 3 0.14 0.18
 -3 3 3 0.11 0.12
 3 3 -3 0.1 0.14
 -3 -3 3 0.12 0.12
 -3 -3 3 0.19 0.13
 3 -3 -3 0.4 0.18
 -3 3 2 17.07 0.93
 3 3 -2 16.65 1.01
 -3 3 2 16.87 1.21
 3 -3 -2 15.21 1.05
 -3 -3 2 14.38 1
 -3 -3 2 16.4 0.86
 -3 -3 2 15.89 0.96
 3 3 -1 30.32 1.67
 -3 3 1 28.09 1.91
 -3 3 1 30.32 1.48
 -3 -3 1 29.71 1.36
 3 -3 -1 29.83 1.68
 3 3 0 30.29 1.69
 -3 3 0 31.15 1.48
 -3 3 0 29.47 1.93
 3 -3 0 29.48 1.66
 -3 -3 0 30.77 1.29
 -3 -3 0 29.71 1.69
 3 3 1 34.92 2.01
 -3 3 -1 36.71 2.28
 -3 3 -1 37.59 1.78
 3 -3 1 36.2 1.93
 3 -3 1 37.8 1.94
 -3 3 -2 1.53 0.3
 3 3 2 1.05 0.26
 -3 3 -2 1.61 0.27
 3 3 2 1.44 0.15
 3 -3 2 1.73 0.19
 3 -3 2 1.61 0.19
 -3 3 -3 18.61 1.23
 3 3 3 17.23 0.89
 3 3 3 17.51 1.14
 3 -3 3 17.74 1.03
 3 -3 3 15.88 1.1
 -3 -3 -4 1.77 0.35
 3 -3 4 1.09 0.28
 3 -3 4 1.12 0.26
 -3 -3 -5 0.9 0.42
 3 -3 5 0.81 0.28
 3 -3 5 1 0.28
 3 -3 6 4.29 0.61
 3 3 7 3.7 0.4
 3 3 7 3.54 0.3
 -3 -3 -7 3.49 0.34
 3 3 8 0.06 0.13
 3 3 8 0.03 0.16
 -3 -3 -8 0 0.17
 -3 -3 -8 0.02 0.13
 3 3 9 7.26 0.45
 3 3 9 7.3 0.53
 -3 -3 -9 6.39 0.54
 3 -3 9 7.17 0.53
 3 3 10 0.95 0.2
 3 -3 10 0.79 0.19
 3 -3 10 1.24 0.25
 -3 -3 -10 1.14 0.2
 3 3 11 1.47 0.14
 3 -3 11 1.71 0.17
 3 -3 11 2.09 0.23
 -3 -4 11 0.58 0.14
 -3 -4 11 0.26 0.1
 3 -4 -11 0.34 0.1
 -3 4 10 0.13 0.07
 -3 -4 10 0.11 0.14
 3 -4 -10 0.05 0.14
 -3 4 9 2.39 0.26
 3 -4 -9 2.15 0.24
 3 -4 -9 2 0.34
 -3 -4 9 1.96 0.31
 -3 4 8 11.92 0.73
 3 -4 -8 12.27 0.7
 -3 4 7 0.29 0.14
 3 -4 -7 -0.07 0.13
 -3 4 6 6.74 0.81
 -3 -4 6 7.17 0.82
 -3 4 5 7.91 0.75
 -3 -4 5 6.29 0.74
 -3 -4 5 6.65 0.72
 -3 4 4 49.21 2.41
 -3 -4 4 46.76 2.86
 -3 -4 4 49.33 2.39
 3 -4 -4 45.28 2.76
 3 4 -3 0.9 0.25
 -3 4 3 1.42 0.28
 -3 4 3 1.33 0.34
 3 -4 -3 0.83 0.26
 -3 -4 3 1.48 0.28
 -3 4 2 1.16 0.31
 3 4 -2 1.3 0.27
 -3 4 2 0.98 0.24
 -3 -4 2 1.4 0.22
 3 -4 -2 1.08 0.3
 -3 -4 2 1.42 0.24
 3 4 -1 64.3 3.36
 -3 4 1 63.45 2.94
 -3 4 1 63.35 3.87
 3 -4 -1 62.46 3.36
 -3 -4 1 64.07 2.8
 3 4 0 5.31 0.56
 -3 4 0 6.22 0.5
 -3 4 0 6.81 0.64
 3 -4 0 6.45 0.54
 -3 -4 0 5.81 0.31
 3 4 1 24.48 1.5
 -3 4 -1 24.82 1.67
 -3 4 -1 25.25 1.32
 3 -4 1 23.29 1.39
 -3 4 -2 9.96 0.81
 3 4 2 9.05 0.76
 -3 4 -2 8.74 0.64
 3 -4 2 8.29 0.59
 -3 4 -3 4.61 0.56
 3 4 3 4.83 0.58
 3 -4 3 5.9 0.57
 3 -4 4 59.13 2.95
 -3 -4 -4 60.35 3.32
 -3 -4 -5 11.25 1.2
 3 -4 5 11.13 0.9
 3 -4 6 3.04 0.54
 -3 -4 -6 3.82 0.82
 3 4 7 1.61 0.22
 3 4 7 1.79 0.26
 -3 4 -7 1.96 0.23
 -3 -4 -7 2.12 0.28
 3 4 8 0.84 0.19
 3 4 8 0.65 0.13
 -3 -4 -8 0.67 0.2
 3 4 9 0.35 0.16
 -3 -4 -9 0.59 0.22
 -3 -4 -9 0.48 0.17
 3 4 10 1.51 0.19
 3 -4 10 1.87 0.25
 -3 -4 -10 1.25 0.23
 3 -4 11 1.8 0.19
 -3 -4 -11 2.11 0.17
 3 -4 11 2.46 0.24
 3 -5 -11 0.15 0.1
 -3 -5 11 -0.07 0.11
 -3 -5 11 -0.01 0.09
 3 -5 -10 2.37 0.29
 -3 -5 10 2.77 0.3
 3 -5 -9 6.39 0.43
 -3 5 8 0.05 0.1
 3 5 -8 0.11 0.13
 3 -5 -8 0.21 0.2
 3 5 -7 0.08 0.11
 -3 5 7 0.12 0.09
 3 -5 -7 0.22 0.19
 3 5 -6 8.08 0.46
 -3 5 6 7.7 0.48
 -3 -5 6 7.85 0.91
 -3 5 5 3.64 0.55
 -3 -5 5 4.17 0.58
 -3 5 4 2.42 0.49
 -3 5 4 2.15 0.42
 -3 -5 4 1.59 0.34
 -3 5 3 20.93 1.22
 -3 5 3 18.82 1.56
 3 -5 -3 19.47 1.4
 -3 -5 3 19.65 1.13
 3 5 -2 0.85 0.28
 -3 5 2 0.97 0.3
 -3 5 2 0.56 0.19
 -3 -5 2 1.07 0.22
 3 -5 -2 0.78 0.27
 3 5 -1 0.49 0.2
 -3 5 1 0.52 0.17
 -3 5 1 0.92 0.31
 3 -5 -1 0.55 0.24
 3 5 0 14.69 1.08
 -3 5 0 16.75 0.97
 -3 5 0 15.33 1.24
 3 -5 0 14.88 1.05
 -3 5 -1 0.13 0.2
 -3 5 -1 0.42 0.16
 3 5 1 0.1 0.23
 3 -5 1 0.26 0.18
 -3 5 -2 3.94 0.54
 -3 5 -2 3.69 0.44
 3 5 2 2.88 0.48
 3 5 3 25.84 1.68
 3 -5 3 24.65 1.46
 3 -5 4 3.02 0.49
 3 -5 5 12.13 1.08
 -3 5 -6 3.46 0.3
 3 5 6 3.4 0.33
 -3 -5 -6 3.6 0.87
 3 5 7 1.85 0.24
 -3 5 -7 1.48 0.22
 -3 -5 -7 1.61 0.28
 -3 5 -8 2.2 0.26
 3 5 8 1.8 0.25
 -3 -5 -8 1.22 1.05
 -3 -5 -8 1.64 0.25
 3 5 9 -0.1 0.08
 -3 -5 -9 0.05 0.18
 -3 -5 -9 0.04 0.12
 3 -5 10 0.94 0.2
 -3 -5 -10 1.14 0.21
 3 -6 -10 1.44 0.22
 -3 -6 10 1.76 0.22
 3 6 -9 2.86 0.3
 3 -6 -9 2.85 0.29
 3 6 -8 4.94 0.4
 3 -6 -8 5.26 0.46
 3 6 -7 5.04 0.4
 3 -6 -7 5.33 0.48
 3 6 -6 2.63 0.27
 -3 -6 5 7.23 0.81
 -3 6 4 0.45 0.24
 -3 6 4 0.16 0.28
 -3 -6 4 0.01 0.23
 -3 6 3 0.84 0.3
 -3 6 3 0.76 0.33
 -3 6 3 0.97 0.36
 -3 6 2 10.78 1.15
 3 6 -2 13.61 1.04
 -3 6 2 11.32 0.96
 -3 6 2 12.61 0.87
 3 -6 -2 12.4 1.04
 -3 6 1 7.54 0.92
 3 6 -1 6.39 0.74
 -3 6 1 7.4 0.66
 3 -6 -1 6.62 0.76
 3 6 0 3.04 0.49
 -3 6 0 2.75 0.4
 -3 6 0 3.01 0.58
 3 -6 0 3.06 0.49
 3 6 1 1.37 0.37
 -3 6 -1 1.16 0.26
 -3 6 -1 1.04 0.33
 3 -6 1 1.35 0.33
 3 6 2 3.64 0.57
 -3 6 -2 3.32 0.47
 3 6 2 3.35 0.55
 -3 6 -2 2.88 0.55
 3 -6 3 6.33 0.67
 3 -6 4 0.95 0.31
 3 6 6 0.97 0.15
 -3 6 -6 0.8 0.15
 -3 6 -7 29.35 1.27
 3 6 7 28.29 1.29
 -3 -6 -7 28.53 1.42
 -3 6 -8 0.2 0.13
 -3 -6 -8 0.7 0.84
 -3 -6 -8 0.77 0.19
 -3 6 -9 -0.08 0.09
 -3 -6 -9 0 0.12
 -3 6 -10 0.19 0.13
 -3 -6 -10 0.14 0.16
 3 -6 10 0.45 0.17
 3 7 -10 0.11 0.12
 3 -7 -10 -0.09 0.11
 -3 -7 10 0.09 0.16
 3 7 -9 2.53 0.26
 3 -7 -9 2.08 0.24
 3 7 -8 -0.01 0.1
 3 -7 -8 -0.06 0.15
 3 7 -7 0.92 0.17
 3 -7 -7 0.68 0.25
 3 7 -6 1.01 0.18
 3 7 -5 1.99 0.22
 -3 7 5 2.71 0.26
 -3 7 4 5.1 0.77
 -3 7 3 2.97 0.55
 -3 7 2 22.8 1.59
 -3 7 2 24.79 1.99
 -3 7 2 25.21 1.48
 3 7 -2 22.74 1.56
 -3 7 1 13.76 1.3
 3 7 -1 10.35 1.07
 -3 7 1 13.53 1.07
 -3 7 1 13.39 0.95
 -3 7 0 5.5 0.83
 3 7 0 6.07 0.73
 -3 7 0 5.96 0.64
 -3 7 0 4.9 0.68
 3 -7 0 4.79 0.7
 3 7 1 1.73 0.4
 -3 7 -1 1.72 0.45
 -3 7 -1 2.46 0.44
 3 7 2 2.38 0.51
 -3 7 -2 2.38 0.42
 3 7 3 1.14 0.38
 3 -7 3 0.25 0.23
 3 7 4 17.35 1.07
 3 -7 4 15.55 1.19
 3 7 5 17.69 1.11
 -3 7 -5 15.43 0.73
 -3 7 -6 23.6 1.06
 3 7 6 24.5 1.48
 -3 7 -7 16.78 0.81
 -3 -7 -7 16.59 0.94
 -3 7 -8 3.41 0.31
 -3 -7 -8 2.7 0.31
 -3 -7 -8 2.81 0.66
 -3 7 -9 0.51 0.13
 -3 -7 -9 0.27 0.13
 -3 7 -10 0.27 0.12
 -3 -7 -10 0.05 0.1
 3 8 -9 0.6 0.15
 3 -8 -9 0.63 0.14
 3 8 -8 0.3 0.14
 3 -8 -8 0.36 0.16
 3 8 -7 0.19 0.11
 3 -8 -7 0.31 0.23
 3 8 -6 0.42 0.12
 -3 8 5 1.77 0.53
 -3 8 5 1.81 0.22
 3 8 -5 1.53 0.19
 -3 8 4 -0.02 0.09
 -3 8 4 0.42 0.35
 3 8 -4 0.13 0.08
 -3 8 3 8.24 1.02
 -3 8 3 9.73 0.74
 -3 8 2 3.36 0.6
 3 8 -2 4.47 0.69
 -3 8 1 3.97 0.75
 3 8 -1 3.33 0.62
 -3 8 1 3.1 0.6
 3 8 0 0.24 0.23
 -3 8 0 1.33 0.44
 -3 8 0 0.78 0.31
 3 8 1 0.15 0.23
 -3 8 -1 0.46 0.34
 -3 8 -1 0.39 0.3
 3 8 2 2.4 0.53
 3 -8 2 2.23 0.43
 3 8 3 0.16 0.23
 3 8 3 0.18 0.1
 3 8 3 -0.05 0.16
 3 -8 3 0.09 0.3
 -3 8 -4 0.2 0.1
 3 8 4 0.44 0.14
 3 8 4 0.33 0.2
 3 8 5 0.74 0.17
 -3 8 -5 0.54 0.11
 3 8 5 0.6 0.25
 3 8 6 2.93 0.46
 -3 8 -6 2.71 0.25
 3 8 7 0.27 0.44
 -3 8 -7 -0.01 0.09
 -3 -8 -7 0.04 0.2
 -3 8 -8 2.51 0.25
 -3 -8 -8 3.17 0.32
 -3 -8 -8 2.41 0.83
 -3 8 -9 0.31 0.12
 -3 -8 -9 0.52 0.14
 -3 -8 -9 -0.74 0.69
 3 9 -9 0 0.09
 3 -9 -9 -0.05 0.1
 3 9 -8 3.43 0.29
 3 -9 -8 3.87 0.36
 -3 9 7 0.37 0.38
 3 9 -7 0.67 0.15
 -3 9 6 -0.01 0.11
 3 9 -6 0.06 0.12
 -3 9 6 0.76 0.36
 -3 9 5 -0.24 0.3
 3 9 -5 0.32 0.12
 -3 9 5 0.24 0.24
 -3 9 5 0.34 0.13
 -3 9 4 3.55 0.7
 -3 9 4 3.46 0.5
 -3 9 4 3.36 0.3
 3 9 -4 3.6 0.25
 -3 9 3 0.2 0.11
 -3 9 3 0.28 0.27
 -3 9 3 0.33 0.21
 3 9 -3 0.01 0.17
 -3 9 2 3.03 0.64
 -3 9 2 3.69 0.25
 3 9 -2 4.21 0.79
 -3 9 2 3.62 0.49
 3 9 -1 0.4 0.4
 -3 9 1 0.6 0.34
 -3 9 1 0.24 0.2
 -3 9 0 0.28 0.22
 -3 9 0 -0.16 0.31
 3 9 0 0.44 0.39
 3 9 1 6.47 0.88
 3 9 1 5.98 0.34
 3 9 2 -0.03 0.24
 3 9 2 -0.13 0.21
 3 9 2 0.21 0.1
 3 9 3 0.19 0.12
 3 9 3 0.35 0.27
 3 9 3 0.43 0.27
 -3 9 -4 3.02 0.21
 3 9 4 3.1 0.45
 3 9 4 3.22 0.3
 3 9 5 0.17 0.13
 -3 9 -5 0.14 0.09
 3 9 5 -0.02 0.23
 3 9 6 0.38 0.29
 -3 9 -6 0.28 0.11
 3 9 7 -0.06 0.48
 -3 9 -7 0.11 0.09
 -3 -9 -7 0.29 0.19
 -3 9 -8 0.71 0.13
 -3 -9 -8 -0.81 0.78
 -3 -9 -8 0.65 0.16
 -3 9 -9 0.22 0.08
 -3 -9 -9 0.16 0.12
 3 10 -8 2.38 0.21
 3 -10 -8 2.53 0.26
 -3 10 7 0.25 0.35
 -3 10 7 0.13 0.12
 3 10 -7 0 0.08
 -3 10 6 0 0.13
 3 10 -6 0.12 0.08
 -3 10 6 0.01 0.24
 -3 10 6 0.02 0.13
 3 10 -5 0.03 0.09
 -3 10 5 0.2 0.38
 -3 10 5 -0.13 0.19
 -3 10 5 0.08 0.11
 -3 10 4 0.25 0.12
 -3 10 4 0.15 0.23
 3 10 -4 0.51 0.11
 -3 10 4 0.1 0.26
 -3 10 3 2.16 0.23
 -3 10 3 2.27 0.42
 3 10 -3 2.12 0.25
 -3 10 3 2.59 0.63
 -3 10 2 0.46 0.33
 3 10 -2 0.48 0.21
 -3 10 2 0.67 0.25
 -3 10 2 0.42 0.12
 3 10 -2 -0.25 0.74
 3 10 -1 7.71 0.41
 -3 10 1 7.84 0.78
 3 10 -1 8.15 1.01
 -3 10 1 7.66 0.4
 -3 10 1 8.94 1.09
 3 10 0 2.45 0.56
 -3 10 0 2.43 0.45
 3 10 0 2.9 0.23
 -3 10 0 2.37 0.64
 3 10 1 0.19 0.1
 3 10 1 0.39 0.4
 3 10 2 1.68 0.19
 3 10 2 2.1 0.37
 3 10 2 1.21 0.49
 3 10 3 -0.09 0.1
 3 10 3 0.23 0.26
 3 10 3 -0.11 0.31
 3 10 4 -0.22 0.18
 3 10 4 0.11 0.11
 3 10 4 0.13 0.27
 3 10 5 0.39 0.26
 -3 10 -5 0.35 0.09
 3 10 5 0.24 0.14
 -3 10 -6 -0.02 0.08
 3 10 6 -0.01 0.1
 3 10 6 -0.17 0.34
 -3 10 -7 -0.02 0.08
 3 10 7 0.06 0.49
 -3 -10 -7 0.07 0.15
 -3 10 -8 0.94 0.13
 -3 -10 -8 0.91 0.15
 -3 -10 -8 1.71 0.76
 3 11 -7 0.08 0.08
 -3 11 7 -0.08 0.15
 -3 11 7 0.08 0.1
 3 -11 -7 0.4 0.17
 3 11 -6 1.02 0.14
 -3 11 6 1.02 0.23
 -3 11 6 0.65 0.39
 -3 11 6 0.87 0.16
 -3 11 5 0.09 0.19
 -3 11 5 0.02 0.34
 3 11 -5 -0.03 0.07
 -3 11 5 -0.16 0.08
 -3 11 4 1.92 0.39
 -3 11 4 2.62 0.26
 -3 11 4 3.08 0.64
 3 11 -4 3.2 0.22
 -3 11 3 -0.44 0.19
 3 11 -3 -0.05 0.12
 -3 11 3 0.03 0.35
 -3 11 3 0.21 0.12
 -3 11 2 0.93 0.15
 -3 11 2 1.22 0.34
 -3 11 2 1.02 0.47
 3 11 -2 1.05 0.23
 -3 11 1 2.06 0.19
 -3 11 1 1.92 0.4
 -3 11 1 1.47 0.5
 3 11 -1 1.52 0.66
 3 11 -1 2.13 0.23
 3 11 0 0.11 0.09
 3 11 0 -0.21 0.37
 -3 11 0 -0.11 0.15
 3 11 1 2.6 0.23
 3 11 1 2.45 0.57
 3 11 2 1.92 0.39
 3 11 2 1.85 0.21
 3 11 2 1.86 0.55
 3 11 3 0.31 0.27
 3 11 3 -0.04 0.36
 3 11 3 0.29 0.11
 3 11 4 5.68 0.62
 3 11 4 5.2 0.79
 3 11 4 5.73 0.39
 -3 11 -5 3.15 0.2
 3 11 5 2.83 0.47
 3 11 5 3.94 0.71
 3 11 5 3.26 0.3
 3 11 6 0.64 0.4
 -3 11 -6 0.5 0.1
 3 11 6 0.51 0.14
 3 11 6 0.54 0.51
 -3 11 -7 0.53 0.09
 -3 -11 -7 0.38 0.17
 -3 -11 -7 0.19 0.37
 3 12 -6 0.72 0.1
 -3 12 6 0.84 0.13
 -3 12 6 1.05 0.23
 -3 12 5 2.25 0.51
 -3 12 5 3.62 0.28
 3 12 -5 3.21 0.21
 -3 12 5 3.28 0.42
 -3 12 4 2.58 0.24
 -3 12 4 2.88 0.59
 3 12 -4 2.33 0.19
 -3 12 4 2.81 0.41
 -3 12 3 5.86 0.62
 3 12 -3 6.2 0.32
 -3 12 3 4.1 0.75
 -3 12 3 5.91 0.36
 -3 12 2 0.33 0.26
 -3 12 2 0.3 0.1
 -3 12 2 -0.01 0.41
 3 12 -2 0.42 0.2
 3 12 -1 1.21 0.24
 -3 12 1 0.86 0.13
 -3 12 1 0.73 0.3
 3 12 -1 0.87 0.23
 -3 12 1 1.09 0.5
 3 12 -1 -0.56 0.86
 3 12 0 5.76 0.92
 3 12 0 6.18 0.39
 3 12 1 0.02 0.09
 3 12 1 -0.01 0.4
 3 12 2 2.8 0.63
 3 12 2 1.94 0.37
 3 12 2 2.17 0.22
 3 12 3 -0.26 0.19
 3 12 3 0.25 0.39
 3 12 3 0 0.1
 3 12 4 4.96 0.33
 3 12 4 3.82 0.69
 3 12 4 3.9 0.54
 3 12 5 2.28 0.55
 3 12 5 1.74 0.55
 3 12 5 3.27 0.28
 3 12 6 -0.07 0.11
 3 12 6 0.12 0.47
 -3 -12 -6 -0.74 0.22
 -3 13 5 0.08 0.08
 -3 13 5 -0.09 0.14
 -3 13 4 -0.07 0.15
 -3 13 4 0.02 0.08
 -3 13 3 0.77 0.4
 -3 13 3 0.99 0.14
 -3 13 3 1.18 0.27
 3 13 -2 1.97 0.13
 -3 13 2 1.4 0.31
 -3 13 2 1.41 0.16
 -3 13 2 0.94 0.47
 3 13 -1 7.61 0.42
 -3 13 1 7.5 0.36
 -3 13 1 6.98 0.64
 3 13 0 2.11 0.28
 3 13 0 1.9 0.26
 3 13 0 0.84 0.9
 3 13 1 1.5 0.23
 3 13 1 1.55 0.66
 3 13 2 -0.29 0.33
 3 13 2 -0.05 0.12
 3 13 3 -0.05 0.4
 3 13 3 0.69 0.14
 3 13 3 0.31 0.38
 3 13 4 0.03 0.1
 3 13 4 -0.05 0.45
 3 13 5 -0.01 0.12
 -3 -13 -5 -0.32 0.19
 -3 14 3 0.66 0.09
 -3 14 3 0.76 0.19
 -3 14 2 -0.08 0.2
 -3 14 2 -0.03 0.05
 3 14 0 2.14 0.18
 3 14 1 1.36 0.21
 3 14 2 1.51 0.22
 3 14 2 1.16 0.21
 3 14 3 0.1 0.18
 -4 0 11 0.16 0.12
 -4 0 11 -0.01 0.07
 -4 0 10 2.08 0.21
 -4 0 10 1.8 0.29
 4 0 -10 1.5 0.14
 -4 0 10 2.03 0.25
 -4 0 9 -0.07 0.14
 -4 0 9 0.1 0.13
 4 0 -9 0.03 0.12
 -4 0 8 20.59 1.04
 4 0 -8 19.65 1.09
 4 0 -7 -0.08 0.09
 -4 0 7 0.23 0.33
 -4 0 6 10.28 0.93
 -4 0 6 8.2 0.83
 -4 0 5 -0.09 0.12
 -4 0 5 -0.03 0.15
 -4 0 4 66.78 3.13
 -4 0 4 65.76 3.88
 -4 0 3 -0.1 0.13
 -4 0 3 -0.07 0.1
 -4 0 3 -0.03 0.09
 4 0 -3 -0.18 0.13
 4 0 -3 0.21 0.21
 -4 0 2 225.89 12.88
 -4 0 2 237.11 9.87
 -4 0 1 0.23 0.15
 -4 0 1 0.19 0.1
 4 0 -1 -0.09 0.09
 -4 0 1 -0.07 0.14
 4 0 -1 -0.03 0.1
 4 0 0 16.78 1.21
 -4 0 0 24.42 1.06
 -4 0 0 25.27 1.46
 -4 0 -1 -0.05 0.1
 -4 0 -1 0.29 0.1
 4 0 1 0.01 0.07
 4 0 1 0.11 0.09
 -4 0 -1 -0.07 0.12
 -4 0 -2 288.47 12.16
 4 0 2 286.84 13.87
 4 0 2 286.49 15.8
 4 0 3 -0.09 0.08
 -4 0 -3 -0.08 0.1
 4 0 3 0.09 0.12
 4 0 3 -0.1 0.08
 -4 0 -3 -0.22 0.12
 4 0 4 0.15 0.16
 4 0 4 0.14 0.15
 -4 0 -4 0.15 0.35
 4 0 5 -0.07 0.15
 4 0 5 0.06 0.21
 4 0 6 1.49 0.42
 4 0 6 1.28 0.37
 -4 0 -7 -0.03 0.09
 4 0 7 0.16 0.4
 -4 0 -8 1.62 0.24
 4 0 8 2.1 0.35
 4 0 8 1.81 0.28
 4 0 9 -0.09 0.15
 4 0 9 0.12 0.16
 -4 0 -9 0.25 0.12
 4 0 10 1.58 0.24
 4 0 10 1.28 0.18
 4 0 11 -0.1 0.11
 4 0 11 0.12 0.09
 -4 1 11 0.26 0.11
 -4 -1 11 0.22 0.09
 -4 -1 11 0.55 0.17
 -4 1 10 0.24 0.16
 -4 1 10 0.5 0.14
 -4 -1 10 0.63 0.14
 -4 -1 10 0.49 0.16
 4 -1 -10 0.31 0.12
 -4 1 9 0.4 0.15
 -4 1 9 0.82 0.19
 -4 1 9 0.83 0.23
 4 1 -9 0.62 0.14
 -4 -1 9 0.32 0.17
 4 -1 -9 0.48 0.17
 -4 1 8 1.62 0.23
 4 1 -8 1.41 0.22
 -4 1 8 1.27 0.26
 -4 -1 8 1.79 0.28
 4 -1 -8 1.67 0.29
 -4 1 7 0.62 0.41
 4 1 -7 0.59 0.18
 4 -1 -7 0.97 0.25
 -4 -1 7 0.76 0.38
 -4 1 6 26.65 1.62
 -4 -1 6 25.68 1.82
 -4 -1 6 24.66 1.58
 -4 1 5 4.79 0.58
 -4 -1 5 5.22 0.58
 -4 -1 5 6.09 0.62
 4 1 -4 15.51 1
 -4 1 4 12.9 0.86
 -4 1 4 13.15 0.99
 -4 -1 4 12.03 0.98
 -4 -1 4 14.38 0.9
 -4 1 3 3.53 0.43
 4 1 -3 3.4 0.44
 -4 1 3 3.26 0.37
 4 1 -3 3.68 0.26
 4 -1 -3 3.37 0.43
 4 -1 -3 2.52 0.4
 -4 -1 3 3.27 0.29
 -4 -1 3 3.73 0.39
 -4 -1 3 3.48 0.37
 -4 1 2 22.1 1.47
 4 1 -2 23.55 1.34
 -4 1 2 22.14 1.17
 4 1 -2 21.49 1.33
 4 1 -2 21.71 1.34
 4 -1 -2 22.22 1.35
 -4 -1 2 23.46 1.42
 -4 -1 2 22.4 1.14
 4 -1 -2 28.5 1.51
 -4 -1 2 21.58 1.39
 -4 1 1 15.55 1.12
 -4 1 1 15.96 0.87
 4 1 -1 16.64 1
 4 1 -1 15.7 1.01
 -4 -1 1 17.01 0.83
 -4 -1 1 17.72 1.13
 4 -1 -1 17.66 1.09
 4 -1 -1 15.63 1
 4 1 0 4.54 0.4
 4 1 0 4.98 0.37
 -4 1 0 4.84 0.42
 -4 1 0 5.16 0.51
 -4 1 0 5.14 0.36
 -4 -1 0 4.98 0.3
 -4 1 -1 29.39 1.89
 -4 1 -1 29.01 1.58
 4 1 1 31.07 1.63
 4 1 1 30.87 1.76
 -4 1 -1 29.55 1.42
 -4 -1 -1 27.66 1.91
 -4 -1 -1 29.97 1.33
 -4 -1 -1 30.14 1.63
 4 1 2 74.74 4.29
 -4 1 -2 77.16 3.38
 -4 1 -2 72.38 3.74
 4 1 2 75.47 3.31
 -4 1 -2 77.17 4.46
 4 1 2 74.99 3.82
 -4 -1 -2 80.29 4.52
 4 -1 2 78.47 4.3
 -4 -1 -2 74.01 3.83
 4 -1 2 74.51 3.74
 4 1 3 12.83 0.89
 -4 1 -3 12.44 1
 4 1 3 11.58 0.78
 4 -1 3 13.05 0.78
 -4 -1 -3 14.05 1.09
 4 -1 3 12.3 0.89
 4 -1 3 12.16 0.64
 4 1 4 7.48 0.66
 4 1 4 8.05 0.59
 -4 1 -4 8.28 0.8
 -4 -1 -4 6.57 0.84
 4 -1 4 7.28 0.59
 4 -1 4 7.18 0.66
 4 1 5 1.22 0.26
 4 1 5 1.4 0.31
 -4 -1 -5 0.59 0.45
 4 -1 5 1.43 0.31
 4 -1 5 0.99 0.3
 4 1 6 4.8 0.63
 4 1 6 4.67 0.65
 4 -1 6 5.09 0.63
 -4 1 -7 0.57 0.16
 4 -1 7 0.36 0.25
 -4 -1 -7 0.72 0.2
 -4 1 -8 0.43 0.13
 4 1 8 0.49 0.21
 4 1 8 0.44 0.17
 -4 -1 -8 0.17 0.15
 4 -1 8 0.26 0.2
 4 1 9 0.46 0.18
 4 1 9 0.26 0.16
 4 1 9 0.28 0.15
 4 -1 9 0.3 0.16
 -4 -1 -9 0.19 0.13
 4 -1 9 0.41 0.23
 4 1 10 1.98 0.19
 4 1 10 2.45 0.31
 4 1 10 2.23 0.25
 4 -1 10 2.38 0.29
 -4 -1 -10 2.4 0.19
 4 -1 10 2.5 0.25
 4 1 11 -0.16 0.08
 4 -1 11 -0.06 0.07
 4 -1 11 -0.01 0.1
 4 -1 11 0.02 0.13
 -4 2 11 1.44 0.17
 -4 -2 11 1.73 0.17
 -4 -2 11 1.51 0.2
 -4 2 10 0.88 0.11
 -4 2 10 1.04 0.2
 -4 -2 10 1.64 0.26
 -4 -2 10 1.04 0.2
 4 -2 -10 0.95 0.18
 -4 2 9 1.64 0.24
 -4 2 9 1.63 0.27
 -4 -2 9 1.34 0.24
 4 -2 -9 1.36 0.25
 -4 2 8 5.57 0.52
 -4 2 8 4.93 0.44
 -4 2 8 4.78 0.35
 4 2 -8 5.06 0.33
 4 -2 -8 4.89 0.36
 -4 -2 8 4.83 0.47
 4 -2 -8 4.74 0.49
 -4 2 7 -0.14 0.18
 4 2 -7 0.26 0.1
 -4 2 7 -0.08 0.24
 -4 2 6 6.63 0.74
 -4 -2 6 7.63 0.79
 -4 2 5 2.29 0.39
 -4 -2 5 2.56 0.44
 4 -2 -5 2.58 0.47
 4 -2 -5 1.4 0.42
 -4 -2 5 2.51 0.43
 4 2 -4 4.64 0.5
 -4 2 4 4.75 0.59
 -4 2 4 3.97 0.48
 -4 -2 4 4.11 0.48
 4 -2 -4 4.25 0.55
 -4 -2 4 4.5 0.51
 -4 2 3 10.54 0.89
 -4 2 3 10.91 0.73
 4 2 -3 12.08 0.81
 4 -2 -3 10.79 0.84
 -4 -2 3 10.98 0.81
 -4 -2 3 10.7 0.71
 4 2 -2 11.07 0.76
 -4 2 2 11.22 0.69
 -4 2 2 10.46 0.87
 -4 -2 2 11.35 0.76
 4 -2 -2 10.5 0.8
 -4 -2 2 11.22 0.76
 -4 -2 2 10.97 0.64
 4 2 -1 5.92 0.51
 -4 2 1 6.04 0.57
 -4 2 1 4.96 0.42
 4 -2 -1 6.13 0.52
 -4 -2 1 6.49 0.38
 -4 -2 1 6.21 0.46
 4 2 0 172.35 8.56
 -4 2 0 176.55 9.85
 -4 2 0 168.56 7.48
 -4 -2 0 171.23 7.32
 4 -2 0 175.79 8.53
 -4 -2 0 180.34 9.83
 4 2 1 4.91 0.45
 4 2 1 4.85 0.31
 -4 2 -1 5.89 0.53
 -4 2 -1 5.33 0.4
 4 2 1 4.61 0.31
 4 2 1 4.82 0.22
 -4 2 -1 4.94 0.4
 4 -2 1 3.49 0.36
 -4 -2 -1 5.27 0.54
 4 -2 1 5.18 0.36
 4 2 2 74.89 3.82
 4 2 2 70.69 3.2
 -4 2 -2 74.57 3.68
 -4 2 -2 77.77 3.38
 -4 2 -2 77.16 4.39
 -4 -2 -2 72.25 4.42
 -4 2 -3 0.28 0.18
 4 2 3 0.26 0.13
 4 2 3 0.26 0.13
 4 2 3 0.39 0.13
 -4 -2 -3 0.3 0.24
 4 -2 3 0.52 0.16
 4 -2 3 0.52 0.18
 -4 2 -4 7.05 0.71
 4 2 4 7.52 0.6
 4 2 4 7.19 0.54
 4 -2 4 6.95 0.65
 -4 -2 -4 7.14 0.86
 4 -2 4 6.84 0.65
 4 -2 5 0.54 0.26
 4 -2 5 1.85 0.38
 -4 -2 -5 1.38 0.5
 4 -2 6 19.91 1.36
 4 2 7 1.5 0.3
 -4 2 -7 1.57 0.17
 4 2 7 1.58 0.23
 -4 -2 -7 1.81 0.23
 -4 -2 -7 1.74 0.3
 4 2 8 2.02 0.25
 4 2 8 2.32 0.36
 4 2 8 2.54 0.31
 -4 -2 -8 2.15 0.32
 4 -2 8 2.68 0.35
 4 2 9 0.25 0.14
 4 2 9 0.6 0.15
 4 2 9 0.61 0.2
 4 -2 9 0.54 0.19
 -4 -2 -9 0.45 0.16
 4 2 10 0.23 0.1
 4 2 10 0.4 0.16
 4 -2 10 0.2 0.13
 4 -2 10 0.35 0.16
 -4 -2 -10 0.3 0.12
 4 2 11 0.05 0.11
 4 -2 11 0.24 0.1
 4 -2 11 0.26 0.11
 -4 -3 11 2.21 0.2
 -4 -3 11 2.5 0.25
 -4 3 10 0.09 0.09
 -4 -3 10 0.28 0.16
 4 -3 -10 0.28 0.14
 -4 -3 10 0.18 0.13
 -4 3 9 2.48 0.3
 4 -3 -9 1.79 0.19
 -4 -3 9 1.61 0.28
 4 -3 -9 1.78 0.31
 -4 3 8 1.13 0.23
 -4 3 8 1.22 0.18
 4 -3 -8 0.96 0.23
 4 -3 -8 1.68 0.23
 -4 3 7 1.27 0.25
 4 -3 -7 1.31 0.25
 -4 3 6 1.06 0.38
 -4 -3 6 2.68 0.48
 -4 3 5 3.79 0.54
 -4 -3 5 5.02 0.59
 4 -3 -5 4.15 0.65
 -4 -3 5 4.61 0.6
 -4 3 4 46.68 2.23
 -4 3 4 43.68 2.79
 -4 -3 4 41.7 2.61
 -4 -3 4 40.35 2.14
 4 -3 -4 41.59 2.49
 4 3 -3 0.06 0.1
 -4 3 3 0.04 0.12
 -4 3 3 -0.06 0.18
 4 -3 -3 0.05 0.19
 -4 -3 3 0.03 0.11
 -4 -3 3 -0.11 0.14
 4 3 -2 41.69 2.25
 -4 3 2 41.78 2.02
 -4 3 2 41.08 2.61
 4 -3 -2 40.23 2.3
 -4 -3 2 40.9 1.91
 -4 -3 2 40 2.38
 -4 3 1 21.87 1.59
 -4 3 1 23.23 1.24
 4 3 -1 23.56 1.41
 -4 -3 1 23.92 1.4
 4 -3 -1 24.09 1.42
 -4 -3 1 23.82 1.11
 -4 -3 1 23.64 1.53
 -4 3 0 15.18 1.1
 4 3 0 14.48 0.97
 -4 3 0 14.95 0.84
 -4 -3 0 13.7 1.04
 4 -3 0 13.8 0.91
 4 3 1 2.24 0.34
 -4 3 -1 2.08 0.38
 -4 3 -1 2.09 0.3
 4 -3 1 1.86 0.25
 4 3 2 26.18 1.52
 -4 3 -2 25.56 1.33
 -4 3 -2 24.38 1.67
 4 -3 2 23.61 1.33
 4 3 3 11.89 0.89
 -4 3 -3 11.78 0.95
 4 -3 3 10.9 0.78
 4 -3 3 12.08 0.86
 -4 -3 -3 11.58 1.05
 -4 -3 -4 4.71 0.56
 4 -3 4 4.55 0.52
 4 -3 4 4.17 0.54
 -4 -3 -4 5.52 0.76
 4 -3 5 5.28 0.65
 -4 -3 -5 5.92 0.85
 4 -3 5 6.13 0.72
 4 -3 6 0.28 0.35
 4 3 7 3.2 0.39
 4 3 7 2.81 0.27
 4 3 7 3.25 0.33
 -4 -3 -7 3.08 0.32
 4 3 8 0.77 0.22
 4 3 8 0.85 0.19
 -4 -3 -8 0.77 0.16
 -4 -3 -8 0.83 0.23
 4 3 9 0.27 0.15
 4 3 9 0.03 0.13
 4 -3 9 0.11 0.18
 -4 -3 -9 0.21 0.16
 4 3 10 0.66 0.17
 -4 -3 -10 0.43 0.14
 4 -3 10 0.22 0.17
 4 -3 10 0.32 0.15
 4 -3 11 1.03 0.14
 4 -3 11 1.15 0.17
 -4 -4 11 1.48 0.16
 -4 -4 11 1.16 0.17
 4 -4 -11 0.96 0.14
 4 -4 -10 -0.04 0.13
 -4 -4 10 -0.05 0.12
 -4 4 9 8.49 0.53
 -4 -4 9 9.02 0.61
 4 -4 -9 9.03 0.66
 4 -4 -9 8.55 0.51
 -4 4 8 0.24 0.16
 4 -4 -8 1.05 0.21
 -4 4 7 23.02 1.17
 4 -4 -7 22.25 1.16
 -4 4 6 22.92 1.18
 -4 4 6 22.27 1.51
 -4 -4 6 26.24 1.59
 -4 4 5 0.29 0.26
 -4 -4 5 0.21 0.2
 -4 -4 5 0.09 0.23
 -4 4 4 51.12 3.23
 -4 4 4 47.37 2.48
 -4 4 4 49.01 2.68
 4 -4 -4 47.62 2.86
 -4 -4 4 50 2.45
 -4 -4 4 48.02 2.96
 4 4 -3 11.24 0.83
 -4 4 3 10.04 0.77
 -4 4 3 9.65 0.97
 4 -4 -3 9.46 0.86
 -4 -4 3 9.98 0.76
 -4 -4 3 10.84 0.72
 -4 4 2 1.2 0.26
 4 4 -2 1.3 0.28
 -4 4 2 1.7 0.4
 -4 -4 2 1.33 0.21
 4 -4 -2 1.31 0.3
 -4 -4 2 1.62 0.28
 -4 -4 2 1.41 0.23
 -4 4 1 0.19 0.17
 4 4 -1 0.08 0.13
 -4 4 1 0.26 0.16
 -4 -4 1 0.16 0.09
 4 -4 -1 0.03 0.17
 -4 -4 1 0.18 0.16
 -4 -4 1 0.1 0.08
 4 4 0 8.06 0.68
 -4 4 0 7.5 0.74
 -4 4 0 7.52 0.59
 -4 -4 0 7.42 0.54
 4 -4 0 8.01 0.64
 4 4 1 66.1 3.57
 -4 4 -1 67.29 4.05
 -4 4 -1 67.74 3.12
 4 -4 1 65.96 3.46
 4 4 2 -0.02 0.13
 -4 4 -2 0.01 0.11
 -4 4 -2 0 0.19
 4 -4 2 0.09 0.11
 -4 4 -3 38.84 2.04
 -4 4 -3 39.14 2.54
 4 4 3 40.97 2.32
 4 -4 3 38.43 2.03
 -4 -4 -4 31.7 2.31
 -4 -4 -4 32.62 1.96
 4 -4 4 29.38 1.74
 4 -4 5 33.57 1.96
 -4 -4 -5 35.08 2.58
 4 4 6 0.41 0.16
 -4 -4 -6 0.46 0.55
 4 -4 6 0.52 0.29
 4 4 7 0.2 0.14
 -4 4 -7 0.48 0.12
 4 4 7 0.05 0.11
 -4 -4 -7 0.44 0.59
 -4 -4 -7 0.07 0.16
 4 4 8 -0.01 0.09
 4 4 8 0 0.13
 -4 -4 -8 -0.11 0.13
 -4 -4 -8 -0.01 0.13
 4 4 9 12.38 0.73
 -4 -4 -9 12.2 0.78
 4 4 10 -0.01 0.07
 4 -4 10 -0.01 0.14
 -4 -4 -10 0.02 0.12
 4 -4 11 1.52 0.18
 4 -5 -10 0.04 0.12
 -4 -5 10 -0.13 0.12
 4 -5 -9 4.76 0.35
 -4 5 8 0.12 0.1
 4 -5 -8 0.17 0.16
 -4 5 7 0.29 0.11
 4 5 -7 0 0.12
 4 -5 -7 0.47 0.21
 -4 5 6 0.62 0.34
 4 5 -6 0.8 0.15
 -4 5 6 0.61 0.14
 -4 -5 6 0.32 0.39
 -4 5 5 1.74 0.39
 -4 -5 5 0.78 0.26
 -4 5 4 0.19 0.18
 -4 5 4 0.38 0.25
 -4 5 4 0.05 0.19
 -4 -5 4 0.13 0.21
 -4 5 3 46.55 2.34
 -4 5 3 43.9 3.03
 -4 5 3 46.85 2.53
 4 5 -3 47.72 2.6
 -4 -5 3 42.37 2.2
 4 -5 -3 43.76 2.68
 4 5 -2 0.42 0.2
 -4 5 2 0.47 0.22
 -4 5 2 0.25 0.23
 4 -5 -2 0.12 0.19
 -4 5 1 -0.15 0.1
 -4 5 1 0.14 0.23
 4 5 -1 -0.12 0.11
 4 -5 -1 0.17 0.16
 -4 5 0 51.85 3.23
 -4 5 0 50.47 2.46
 4 5 0 46.9 2.8
 4 -5 0 50.41 2.77
 -4 5 -1 14.6 0.99
 4 5 1 15.68 1.17
 -4 5 -1 17.2 1.3
 4 -5 1 15.67 1.07
 4 5 2 111.86 5.83
 -4 5 -2 110.34 6.58
 -4 5 -2 112.51 5.09
 4 5 3 -0.02 0.17
 4 -5 3 -0.07 0.21
 4 -5 4 32.14 1.85
 -4 -5 -5 5.28 0.95
 4 -5 5 4.91 0.66
 -4 5 -6 1.06 0.18
 4 5 6 0.9 0.18
 -4 -5 -6 1.2 0.7
 -4 5 -7 3.67 0.34
 4 5 7 3.81 0.36
 -4 -5 -7 4.03 0.39
 -4 5 -8 0.21 0.13
 4 5 8 0.19 0.12
 -4 -5 -8 1.45 1.16
 -4 -5 -8 0.2 0.14
 4 5 9 0.33 0.1
 -4 -5 -9 0.77 0.2
 -4 -5 -9 0.63 0.2
 -4 -5 -10 0.27 0.13
 4 -5 10 0.31 0.16
 4 -6 -10 2.13 0.26
 -4 -6 10 1.33 0.2
 4 6 -9 0.4 0.14
 4 -6 -9 0.47 0.15
 4 6 -8 2.59 0.28
 4 -6 -8 2.3 0.32
 4 6 -7 1.84 0.24
 4 -6 -7 1.78 0.29
 4 6 -6 0.8 0.16
 -4 6 5 0.2 0.33
 -4 6 4 4.4 0.6
 -4 6 4 3.84 0.62
 -4 6 3 0.4 0.26
 -4 6 3 0.44 0.3
 4 6 -3 0.29 0.57
 -4 6 3 0.21 0.2
 4 6 -2 27.56 1.76
 -4 6 2 26.2 1.65
 4 6 -2 25.64 1.63
 -4 6 2 26.87 1.56
 -4 6 2 25.98 2.04
 -4 6 1 12.04 0.85
 -4 6 1 11.41 1.11
 4 6 -1 10.37 0.97
 4 -6 -1 10.83 0.97
 -4 6 0 0.44 0.25
 4 6 0 0.47 0.33
 -4 6 0 0.5 0.25
 4 -6 0 0.34 0.21
 4 6 1 -0.15 0.17
 -4 6 -1 -0.16 0.16
 4 6 1 0.18 0.27
 -4 6 -1 0.09 0.19
 4 -6 1 0.1 0.16
 -4 6 -2 38.27 2.02
 -4 6 -2 37.07 2.56
 4 6 2 35.69 2.15
 4 -6 3 7.76 0.78
 4 -6 4 9.63 0.94
 4 6 5 1.01 0.14
 -4 6 -5 1.24 0.18
 4 -6 5 1.37 0.47
 -4 -6 -5 1.7 0.65
 -4 6 -6 -0.03 0.09
 4 6 6 -0.01 0.09
 -4 -6 -6 -0.13 0.22
 4 6 7 0.06 0.07
 -4 6 -7 0.09 0.11
 -4 -6 -7 -0.21 0.16
 -4 6 -8 0.07 0.11
 -4 -6 -8 -0.05 0.12
 -4 -6 -8 -0.09 1.01
 -4 6 -9 -0.01 0.1
 -4 -6 -9 0.08 0.18
 -4 -6 -9 0.03 0.14
 -4 -6 -10 -0.07 0.11
 4 -6 10 0.06 0.15
 4 -7 -10 -0.08 0.11
 -4 -7 10 0.18 0.15
 4 7 -9 0.02 0.1
 4 -7 -9 -0.13 0.1
 4 7 -8 0.29 0.12
 4 -7 -8 0.49 0.18
 4 7 -7 2.68 0.29
 4 -7 -7 4.46 0.44
 4 7 -6 2.64 0.26
 -4 7 5 0.59 0.14
 4 7 -5 0.41 0.14
 -4 7 5 0.35 0.34
 -4 7 4 1.4 0.47
 -4 7 3 -0.01 0.21
 -4 7 3 0.41 0.42
 -4 7 3 0.27 0.23
 -4 7 2 0.51 0.24
 -4 7 2 -0.21 0.28
 4 7 -2 1.14 0.42
 -4 7 2 0.62 0.34
 -4 7 1 12.34 1.08
 4 7 -1 12.23 1.04
 -4 7 1 15.59 1.43
 -4 7 1 16.01 1.06
 -4 7 0 5.53 0.84
 4 7 0 5.73 0.77
 -4 7 0 7.06 0.73
 -4 7 0 6.5 0.76
 -4 7 -1 3.59 0.51
 -4 7 -1 3.71 0.68
 4 7 1 3.32 0.57
 -4 7 -2 5.57 0.68
 4 7 2 6.12 0.79
 4 -7 3 0.7 0.36
 4 7 4 5.86 0.61
 4 -7 4 5.18 0.74
 -4 7 -5 0.46 0.11
 4 7 5 0.67 0.27
 4 7 6 0.98 0.36
 -4 7 -6 0.71 0.15
 -4 7 -7 0.13 0.12
 -4 -7 -7 0.19 0.19
 -4 7 -8 0.52 0.14
 -4 -7 -8 0.54 0.2
 -4 -7 -8 0.94 1.01
 -4 7 -9 0.34 0.12
 -4 -7 -9 0.4 0.77
 -4 -7 -9 0.13 0.14
 4 -7 10 1.24 0.19
 -4 -7 -10 1.36 0.21
 4 8 -9 2.99 0.26
 4 -8 -9 2.87 0.26
 4 8 -8 0.87 0.16
 4 -8 -8 1.35 0.23
 4 8 -7 1.04 0.17
 4 -8 -7 0.89 0.26
 4 8 -6 0.72 0.16
 -4 8 5 0.11 0.34
 4 8 -5 0.25 0.11
 -4 8 5 0.21 0.12
 -4 8 4 1.19 0.18
 -4 8 4 0.52 0.32
 4 8 -4 1.03 0.16
 -4 8 3 0.15 0.11
 -4 8 3 1.05 0.18
 -4 8 3 0.23 0.22
 -4 8 2 1.32 0.45
 -4 8 2 1.72 0.55
 -4 8 2 2.31 0.33
 4 8 -2 2.09 0.66
 -4 8 1 3.39 0.6
 -4 8 1 3.33 0.64
 -4 8 1 5.07 0.92
 4 8 -1 3.69 0.68
 -4 8 0 10.87 1.31
 4 8 0 8.89 1.03
 -4 8 0 10.91 1
 -4 8 0 10.61 1.06
 4 8 1 7.18 0.89
 -4 8 -1 6.88 0.78
 -4 8 -1 7.5 1.08
 -4 8 -2 5.15 0.72
 4 8 2 5.33 0.78
 4 8 3 2.42 0.39
 4 8 3 2.28 0.56
 4 8 3 2.48 0.25
 4 -8 3 2.43 0.48
 4 8 4 7.33 0.72
 -4 8 -4 5.77 0.34
 4 8 4 6.65 0.42
 -4 8 -5 0.12 0.1
 4 8 5 0.02 0.17
 4 8 6 0.08 0.38
 -4 8 -6 0.11 0.1
 -4 8 -7 0.09 0.1
 4 8 7 -0.23 0.45
 -4 -8 -7 0.23 0.18
 -4 8 -8 0.64 0.13
 -4 -8 -8 0.37 0.15
 -4 -8 -8 1.85 0.97
 -4 8 -9 -0.03 0.08
 -4 -8 -9 0.1 0.15
 -4 -8 -9 -0.88 0.75
 4 9 -9 0.02 0.08
 4 -9 -9 0.07 0.1
 4 9 -8 0.73 0.14
 4 -9 -8 0.49 0.15
 -4 9 7 0.3 0.39
 4 9 -7 0.21 0.12
 4 -9 -7 0.51 0.25
 -4 9 6 3.02 0.31
 -4 9 6 1.73 0.54
 4 9 -6 2.8 0.27
 4 9 -5 3 0.27
 -4 9 5 2.87 0.43
 -4 9 5 3 0.64
 -4 9 5 2.77 0.29
 -4 9 4 1.24 0.45
 -4 9 4 1.55 0.33
 4 9 -4 1.45 0.17
 -4 9 4 1.13 0.18
 -4 9 3 2.2 0.23
 -4 9 3 2.31 0.59
 4 9 -3 3.33 0.3
 -4 9 3 2.26 0.41
 -4 9 2 4.57 0.3
 -4 9 2 5.47 0.6
 4 9 -2 6.47 1.11
 -4 9 2 5.72 0.83
 4 9 -2 5.25 0.38
 -4 9 1 8.5 0.81
 4 9 -1 10.79 1.11
 4 9 -1 8.58 0.45
 -4 9 1 10.65 1.12
 -4 9 1 8.67 0.43
 4 9 0 0.08 0.09
 4 9 0 0.23 0.25
 -4 9 0 -0.14 0.3
 -4 9 0 0.3 0.27
 4 9 1 3.44 0.69
 4 9 1 3.54 0.28
 4 9 2 7.1 0.71
 4 9 2 6.18 0.39
 4 9 2 7.1 0.95
 4 9 3 1.94 0.24
 4 9 3 1.85 0.36
 4 9 3 1.06 0.47
 -4 9 -4 2.38 0.19
 4 9 4 1.89 0.39
 4 9 4 1.96 0.24
 -4 9 -5 1.43 0.17
 4 9 5 1.07 0.33
 4 9 5 0.95 0.19
 4 9 6 0.1 0.44
 -4 9 -6 0 0.08
 -4 9 -7 1.2 0.17
 4 9 7 0.77 0.52
 -4 -9 -7 1.8 0.27
 -4 9 -8 0 0.09
 -4 -9 -8 0.61 0.91
 -4 -9 -8 0.05 0.14
 -4 9 -9 -0.15 0.06
 -4 -9 -9 -0.04 0.17
 4 10 -8 1.26 0.15
 4 -10 -8 1.32 0.18
 -4 10 7 -0.03 0.12
 -4 10 7 -0.05 0.33
 4 10 -7 0.09 0.07
 4 -10 -7 -0.1 0.16
 -4 10 6 0.71 0.42
 4 10 -6 0.7 0.13
 -4 10 6 0.44 0.15
 -4 10 6 0.63 0.2
 4 10 -5 0.15 0.1
 -4 10 5 0.34 0.31
 -4 10 5 0.23 0.24
 -4 10 5 0.31 0.12
 -4 10 4 0.17 0.33
 -4 10 4 1.02 0.28
 4 10 -4 0.41 0.12
 -4 10 4 0.37 0.12
 4 10 -3 0.9 0.23
 -4 10 3 0.81 0.27
 -4 10 3 0.81 0.14
 -4 10 3 0.98 0.4
 4 10 -2 6.62 1.25
 -4 10 2 5.3 0.86
 4 10 -2 5.64 0.42
 -4 10 2 5.6 0.35
 -4 10 2 5.18 0.63
 4 10 -2 5.91 0.42
 4 10 -1 1.77 0.58
 -4 10 1 2.17 0.2
 4 10 -1 2.26 0.23
 -4 10 1 1.05 0.5
 -4 10 1 2.18 0.44
 4 10 0 -0.36 0.34
 4 10 0 -0.1 0.09
 -4 10 0 0.03 0.19
 4 10 1 0.13 0.09
 4 10 1 0.07 0.32
 4 10 2 4.31 0.79
 4 10 2 3.79 0.32
 4 10 2 5.24 0.57
 4 10 3 1.25 0.19
 4 10 3 1.13 0.4
 4 10 3 0.62 0.29
 4 10 4 0.17 0.19
 -4 10 -4 0.23 0.09
 4 10 4 0 0.1
 4 10 4 0.68 0.39
 -4 10 -5 -0.06 0.07
 4 10 5 0.12 0.22
 4 10 5 -0.04 0.1
 4 10 6 0.36 0.56
 4 10 6 0.34 0.14
 -4 10 -6 0.2 0.09
 -4 10 -7 -0.07 0.08
 -4 -10 -7 0.03 0.14
 -4 -10 -7 -0.66 0.5
 -4 10 -8 0.92 0.13
 -4 -10 -8 -0.04 0.75
 -4 -10 -8 0.94 0.17
 -4 11 7 0.39 0.17
 4 11 -7 0.6 0.1
 -4 11 7 0.69 0.15
 4 -11 -7 0.62 0.17
 -4 11 6 0.8 0.16
 -4 11 6 0.92 0.24
 4 11 -6 0.99 0.13
 -4 11 6 0.7 0.39
 -4 11 5 -0.04 0.19
 -4 11 5 0.26 0.35
 4 11 -5 0.11 0.09
 -4 11 5 0.05 0.11
 -4 11 4 -0.09 0.09
 -4 11 4 -0.39 0.28
 4 11 -4 -0.04 0.08
 -4 11 4 0.05 0.21
 4 11 -3 4.77 0.32
 -4 11 3 4.52 0.55
 -4 11 3 4.5 0.78
 -4 11 3 4.36 0.31
 -4 11 2 -0.33 0.36
 4 11 -2 0.14 0.23
 -4 11 2 0.12 0.19
 -4 11 2 0.01 0.07
 -4 11 1 0.46 0.42
 -4 11 1 0.66 0.25
 -4 11 1 0.42 0.1
 4 11 -1 -0.06 0.58
 4 11 -1 0.68 0.26
 4 11 0 2.14 0.6
 4 11 0 1.46 0.19
 -4 11 0 1.69 0.34
 4 11 1 19.05 0.88
 4 11 1 20.4 1.6
 4 11 2 4.6 0.32
 4 11 2 4.67 0.55
 4 11 2 5.01 0.85
 4 11 3 1.9 0.61
 4 11 3 1.88 0.22
 4 11 3 1.93 0.4
 4 11 4 -0.18 0.32
 4 11 4 -0.3 0.26
 4 11 4 -0.07 0.08
 4 11 5 0 0.49
 4 11 5 -0.07 0.1
 4 11 5 -0.07 0.35
 -4 11 -5 0.07 0.08
 4 11 6 0.03 0.13
 4 11 6 -0.06 0.54
 -4 11 -6 0.04 0.06
 -4 11 -7 1.49 0.14
 -4 -11 -7 1.61 0.67
 -4 -11 -7 1.58 0.22
 4 12 -6 5.17 0.27
 -4 12 6 3.94 0.43
 -4 12 6 5.18 0.32
 -4 12 5 0.63 0.23
 -4 12 5 0.64 0.13
 -4 12 5 0.38 0.28
 4 12 -5 0.58 0.1
 -4 12 4 0.81 0.41
 4 12 -4 0.31 0.09
 -4 12 4 0.3 0.21
 -4 12 4 0.22 0.11
 4 12 -3 0.64 0.11
 -4 12 3 0.29 0.36
 -4 12 3 0.74 0.14
 -4 12 3 0.42 0.2
 4 12 -2 0.07 0.18
 -4 12 2 0.11 0.28
 -4 12 2 0.22 0.21
 -4 12 2 0.02 0.08
 -4 12 1 0.39 0.09
 4 12 -1 0.45 0.24
 -4 12 1 0.42 0.25
 4 12 -1 -1.44 0.85
 4 12 0 1.94 0.29
 4 12 0 0.04 0.79
 -4 12 0 1.64 0.36
 4 12 1 5.44 0.86
 4 12 1 5.59 0.36
 4 12 2 0.07 0.34
 4 12 2 0.07 0.11
 4 12 3 3.94 0.32
 4 12 3 4.44 0.61
 4 12 3 3.61 0.7
 4 12 4 0.93 0.53
 4 12 4 0.77 0.16
 4 12 4 0.71 0.4
 4 12 5 0.06 0.11
 4 12 5 -0.11 0.53
 4 12 6 0.21 0.2
 -4 -12 -6 0.08 0.44
 -4 13 5 0.52 0.18
 -4 13 5 0.55 0.1
 -4 13 4 0.04 0.17
 -4 13 4 0.12 0.08
 4 13 -4 0.21 0.06
 4 13 -3 2.24 0.16
 -4 13 3 1.62 0.31
 -4 13 3 2.59 0.2
 -4 13 2 0.47 0.22
 -4 13 2 0.27 0.08
 4 13 -2 0.23 0.07
 -4 13 2 0.18 0.38
 -4 13 1 0.6 0.24
 4 13 -1 0.89 0.22
 -4 13 1 0.81 0.1
 4 13 0 0.54 0.86
 4 13 0 -0.09 0.22
 4 13 1 5.01 0.39
 4 13 1 3.99 0.82
 4 13 2 0.18 0.21
 4 13 2 -0.55 0.51
 4 13 3 0.43 0.2
 4 13 3 -0.1 0.43
 4 13 3 -0.24 0.49
 4 13 4 0.13 0.19
 4 13 5 0.56 0.21
 -4 -13 -5 -0.23 0.3
 -4 14 3 0.32 0.07
 -4 14 3 0.17 0.14
 -4 14 2 0.63 0.18
 -4 14 2 0.76 0.09
 4 14 0 0.18 0.14
 4 14 1 0.35 0.2
 4 14 2 -0.01 0.19
 4 14 2 0.19 0.18
 4 14 3 0.29 0.19
 4 14 3 -0.05 0.18
 -5 0 11 0.13 0.15
 -5 0 11 0.02 0.07
 -5 0 10 4.41 0.35
 -5 0 10 3.87 0.4
 -5 0 9 0.1 0.12
 -5 0 9 -0.31 0.17
 5 0 -9 -0.02 0.1
 5 0 -8 1.11 0.22
 -5 0 8 1.35 0.23
 5 0 -7 0.33 0.17
 -5 0 6 0.05 0.25
 -5 0 5 0.08 0.13
 -5 0 5 -0.04 0.17
 -5 0 4 16.3 1.18
 -5 0 4 16.69 1.04
 -5 0 3 -0.07 0.11
 5 0 -3 -0.03 0.24
 5 0 -3 -0.09 0.26
 -5 0 3 0.36 0.17
 -5 0 2 29.07 1.85
 -5 0 2 30.15 1.47
 -5 0 1 -0.2 0.1
 5 0 -1 -0.02 0.13
 -5 0 1 0.05 0.11
 5 0 -1 -0.15 0.15
 -5 0 0 5.97 0.4
 -5 0 0 6.43 0.62
 5 0 0 4.68 0.49
 5 0 0 6.62 0.56
 -5 0 -1 -0.02 0.14
 -5 0 -1 0.07 0.1
 5 0 1 -0.11 0.11
 5 0 1 0.09 0.13
 -5 0 -2 11.07 0.61
 5 0 2 9.99 0.74
 -5 0 -2 7.19 0.81
 5 0 2 10.93 0.66
 5 0 3 0.12 0.13
 5 0 3 -0.12 0.08
 5 0 3 -0.07 0.05
 -5 0 -3 0.12 0.27
 -5 0 -4 -0.1 0.46
 5 0 4 0.15 0.16
 5 0 4 -0.01 0.16
 -5 0 -5 1.12 0.74
 5 0 6 2.2 0.43
 -5 0 -7 -0.14 0.11
 5 0 7 -0.05 0.18
 5 0 8 19 1.01
 -5 0 -8 18.74 1
 5 0 8 19.23 1.09
 -5 0 -9 0.06 0.09
 5 0 9 -0.01 0.13
 5 0 9 0.05 0.13
 5 0 10 0.11 0.09
 5 0 10 -0.03 0.15
 5 0 10 -0.03 0.11
 5 0 11 0.11 0.12
 5 0 11 -0.05 0.08
 -5 1 11 0.96 0.16
 -5 -1 11 1.14 0.15
 -5 -1 11 1.48 0.21
 -5 1 10 0.39 0.12
 -5 1 10 0.33 0.16
 -5 -1 10 0.31 0.13
 -5 -1 10 0.42 0.16
 5 -1 -10 0.3 0.11
 -5 1 9 16.31 0.81
 -5 1 9 15.82 0.97
 -5 1 9 16.04 0.91
 -5 -1 9 16.53 0.87
 5 -1 -9 17.55 0.94
 -5 1 8 17.7 0.9
 5 1 -8 16.93 0.94
 -5 1 8 18.22 1.06
 -5 -1 8 19.05 0.97
 5 -1 -8 18.39 1.05
 5 1 -7 20.76 1.08
 -5 1 7 20.81 1.03
 5 -1 -7 19.83 1.14
 -5 1 6 0.11 0.29
 -5 -1 6 0.53 0.29
 -5 1 5 -0.1 0.12
 -5 -1 5 0.05 0.18
 5 -1 -5 0.43 0.8
 5 -1 -5 0.34 0.63
 -5 -1 5 0.13 0.21
 -5 1 4 27.69 1.89
 5 1 -4 33.87 1.85
 -5 1 4 27.84 1.57
 -5 -1 4 28.72 1.88
 -5 -1 4 28.68 1.57
 -5 1 3 0.64 0.21
 5 1 -3 0.43 0.31
 5 1 -3 0.58 0.13
 -5 1 3 0.45 0.16
 -5 -1 3 0.6 0.19
 5 -1 -3 0.22 0.21
 5 -1 -3 0.1 0.18
 -5 -1 3 0.58 0.19
 -5 -1 3 0.58 0.15
 5 1 -2 18.59 1.14
 -5 1 2 16.6 1.18
 -5 1 2 18 0.97
 -5 -1 2 15.53 1.11
 -5 -1 2 16.19 1.11
 -5 -1 2 16.96 0.91
 -5 1 1 6.95 0.63
 5 1 -1 6.13 0.54
 5 1 -1 6.42 0.49
 -5 1 1 6.27 0.46
 -5 -1 1 7.11 0.6
 -5 -1 1 6.49 0.44
 5 1 0 0.02 0.1
 -5 1 0 -0.12 0.06
 5 1 0 0.04 0.09
 -5 1 0 0.06 0.16
 5 -1 0 -0.03 0.08
 -5 -1 0 0 0.05
 5 -1 0 -0.03 0.09
 -5 -1 0 -0.07 0.11
 5 1 1 13.64 0.89
 -5 1 -1 14.11 1.05
 5 1 1 13.62 0.9
 -5 1 -1 14.34 0.78
 -5 1 -1 12.52 0.84
 -5 -1 -1 13.88 0.68
 5 1 2 3.39 0.36
 -5 1 -2 3.52 0.49
 -5 1 -2 4.06 0.37
 5 1 2 3.66 0.29
 5 1 2 3.83 0.4
 -5 1 -2 3.2 0.33
 5 -1 2 3.62 0.31
 -5 -1 -2 1.68 0.43
 5 -1 2 3.86 0.39
 5 1 3 26.69 1.35
 -5 1 -3 27.33 1.87
 5 1 3 27.19 1.71
 5 1 3 26.16 1.52
 5 -1 3 27.97 1.42
 5 -1 3 25.91 1.7
 5 1 4 44.83 2.12
 -5 1 -4 44.23 2.84
 5 1 4 41.35 2.64
 5 -1 4 42.26 2.67
 5 -1 4 44.18 2.18
 5 1 5 0.6 0.21
 5 1 5 0.57 0.25
 5 -1 5 0.87 0.26
 -5 -1 -5 0.14 0.76
 5 -1 5 0.82 0.29
 5 1 6 2.1 0.44
 5 -1 6 1.58 0.4
 -5 1 -7 3.82 0.33
 5 1 7 3.49 0.36
 -5 -1 -7 3.41 0.38
 5 1 8 1.51 0.28
 5 1 8 1.75 0.26
 -5 1 -8 1.6 0.2
 5 -1 8 1.87 0.3
 -5 -1 -8 1.51 0.25
 5 1 9 -0.01 0.19
 5 1 9 -0.05 0.12
 5 1 9 -0.07 0.1
 -5 -1 -9 0.09 0.14
 5 -1 9 0.27 0.18
 5 -1 9 0 0.18
 5 1 10 1.75 0.26
 5 1 10 1.25 0.2
 5 -1 10 1.53 0.2
 5 -1 10 1.28 0.22
 5 1 11 0.33 0.12
 5 -1 11 -0.03 0.14
 5 -1 11 0.11 0.09
 -5 -2 11 1.32 0.17
 -5 -2 11 1.33 0.24
 -5 2 10 7.74 0.53
 -5 -2 10 8.02 0.56
 -5 -2 10 7.78 0.48
 5 -2 -10 8.53 0.53
 -5 2 9 6.4 0.51
 -5 2 9 6.45 0.44
 -5 -2 9 6.47 0.5
 5 -2 -9 6.54 0.57
 -5 2 8 0.92 0.23
 -5 2 8 0.92 0.16
 5 2 -8 1.19 0.15
 -5 2 8 1.24 0.25
 5 -2 -8 0.89 0.18
 5 -2 -8 1.38 0.26
 -5 -2 8 1.31 0.27
 -5 2 7 9.9 0.7
 5 2 -7 10.03 0.58
 -5 2 7 10.02 0.55
 5 -2 -7 10.17 0.62
 -5 2 6 0.29 0.31
 -5 -2 6 0.5 0.26
 -5 2 5 1.49 0.33
 -5 -2 5 2.42 0.41
 5 -2 -5 0.39 0.36
 -5 -2 5 2.57 0.43
 5 -2 -5 0.21 0.27
 5 2 -4 44.16 2.39
 -5 2 4 42.36 2.14
 -5 2 4 42.13 2.67
 5 -2 -4 42.61 2.46
 5 -2 -4 36.02 2.62
 -5 -2 4 41.89 2.58
 -5 -2 4 41.75 2.1
 5 2 -3 4.67 0.52
 -5 2 3 3.79 0.45
 -5 2 3 4.65 0.56
 -5 -2 3 4.09 0.42
 -5 -2 3 3.91 0.45
 5 -2 -3 3.4 0.49
 -5 2 2 2.54 0.33
 -5 2 2 1.95 0.35
 5 2 -2 1.92 0.31
 -5 -2 2 1.84 0.24
 -5 -2 2 2.05 0.29
 5 -2 -2 1.89 0.33
 -5 -2 2 2.39 0.31
 5 2 -1 6.53 0.59
 -5 2 1 7.22 0.52
 -5 2 1 6.19 0.65
 -5 -2 1 7.45 0.42
 5 -2 -1 6.61 0.58
 -5 2 0 26.81 1.76
 5 2 0 25.79 1.52
 -5 2 0 28 1.35
 -5 -2 0 28.4 1.18
 -5 -2 0 20.2 1.69
 5 -2 0 26.92 1.51
 5 2 1 34.71 2.04
 -5 2 -1 34.93 2.29
 5 2 1 36.39 2.04
 -5 2 -1 35.88 1.75
 5 2 1 34.94 1.99
 5 2 1 36 1.55
 -5 -2 -1 37.89 2.34
 -5 2 -2 0.82 0.18
 -5 2 -2 0.72 0.19
 5 2 2 0.91 0.21
 5 2 2 0.74 0.16
 5 2 2 0.94 0.13
 -5 2 -2 0.43 0.23
 -5 -2 -2 0.74 0.26
 5 -2 2 0.26 0.21
 5 -2 2 0.78 0.17
 -5 2 -3 20.38 1.54
 5 2 3 20.59 1.31
 5 2 3 21.73 1.37
 -5 -2 -3 24.12 1.67
 5 -2 3 20.84 1.22
 5 -2 3 21.91 1.42
 -5 2 -4 46.03 3.03
 5 2 4 48.16 2.83
 5 -2 4 47.17 2.9
 5 -2 4 48.79 2.41
 5 -2 5 6.41 0.7
 5 -2 5 7.63 0.73
 -5 -2 -5 4.25 0.88
 5 -2 6 4.97 0.66
 5 2 7 1.78 0.29
 5 2 7 2.18 0.35
 5 2 7 1.11 0.21
 -5 2 -7 1.34 0.14
 -5 -2 -7 2.04 0.29
 -5 -2 -7 1.6 0.22
 5 2 8 -0.09 0.13
 5 2 8 0.1 0.15
 5 2 8 -0.09 0.18
 -5 -2 -8 0.29 0.18
 5 -2 8 -0.05 0.21
 5 2 9 1.31 0.25
 5 2 9 0.9 0.19
 5 2 9 1.38 0.17
 5 -2 9 1.63 0.26
 -5 -2 -9 0.47 0.19
 5 2 10 0.62 0.17
 5 2 10 0.37 0.11
 5 -2 10 0.28 0.15
 5 -2 10 0.14 0.15
 -5 -2 -10 0.14 0.09
 5 2 11 0.19 0.1
 5 -2 11 0.02 0.08
 5 -2 11 0.07 0.11
 -5 -3 11 0.48 0.13
 5 -3 -11 0.36 0.08
 -5 -3 11 0.53 0.12
 -5 3 10 0.07 0.09
 5 -3 -10 0.3 0.13
 -5 -3 10 0.36 0.13
 -5 3 9 0.13 0.12
 5 -3 -9 0.2 0.14
 -5 -3 9 0.38 0.19
 5 -3 -9 -0.05 0.11
 -5 3 8 0.16 0.14
 -5 3 8 0.2 0.12
 -5 -3 8 0.39 0.23
 5 -3 -8 0.43 0.18
 5 -3 -8 0.26 0.18
 -5 3 7 0.01 0.13
 -5 3 7 0.03 0.11
 5 -3 -7 0.09 0.17
 -5 3 6 4.76 0.69
 -5 -3 6 5.13 0.66
 -5 3 5 0.06 0.16
 -5 -3 5 -0.19 0.19
 5 -3 -5 -0.39 0.29
 -5 -3 5 0.03 0.2
 -5 3 4 0.21 0.2
 -5 3 4 -0.1 0.22
 -5 -3 4 0 0.18
 5 -3 -4 0 0.24
 -5 -3 4 0.19 0.18
 5 3 -3 0.28 0.17
 -5 3 3 0.3 0.15
 -5 3 3 0.79 0.3
 -5 -3 3 0.51 0.18
 5 -3 -3 0.34 0.21
 -5 -3 3 0.53 0.19
 -5 3 2 18.24 1.06
 5 3 -2 19.35 1.18
 -5 3 2 18.45 1.35
 -5 -3 2 17.38 1.15
 5 -3 -2 18.56 1.21
 -5 -3 2 13.65 1.16
 -5 -3 2 18.19 0.94
 -5 3 1 0.58 0.27
 5 3 -1 0.58 0.22
 -5 3 1 0.48 0.16
 -5 -3 1 0.59 0.2
 -5 -3 1 0.7 0.13
 5 -3 -1 0.55 0.23
 -5 -3 1 0.68 0.16
 -5 3 0 123.09 7.2
 -5 3 0 119.97 5.47
 5 3 0 124.77 6.28
 -5 -3 0 127.54 7.17
 5 -3 0 124.78 6.23
 5 3 1 38 2.25
 -5 3 -1 41.4 2.61
 -5 3 -1 40.11 1.99
 -5 -3 -1 40.74 2.6
 5 -3 1 41.87 2.19
 -5 3 -2 0.06 0.11
 -5 3 -2 0.16 0.15
 5 3 2 0.09 0.18
 -5 -3 -2 0.64 0.27
 5 -3 2 -0.02 0.09
 5 -3 2 0.08 0.1
 -5 3 -3 30.28 1.61
 -5 3 -3 28.89 2
 5 3 3 28.83 1.78
 5 -3 3 29.89 1.87
 -5 -3 -3 28.59 2.08
 5 3 4 23.41 1.51
 5 -3 4 22.47 1.57
 5 -3 4 23.41 1.4
 -5 -3 -4 25.02 1.87
 5 -3 5 2.83 0.52
 5 -3 5 3.49 0.54
 -5 -3 -5 3.2 0.67
 5 -3 6 0.4 0.26
 5 3 7 7.81 0.47
 5 3 7 7.87 0.54
 5 3 7 8.16 0.57
 -5 -3 -7 7.21 0.5
 -5 -3 -7 8.24 1.01
 -5 -3 -7 8.59 0.64
 5 3 8 3.54 0.34
 5 3 8 4.13 0.42
 -5 -3 -8 4.59 0.46
 -5 -3 -8 3.41 0.33
 5 3 9 0.19 0.16
 5 3 9 0.15 0.11
 5 -3 9 0.05 0.17
 -5 -3 -9 0.18 0.14
 5 3 10 -0.23 0.1
 5 -3 10 -0.03 0.12
 5 -3 10 -0.02 0.15
 -5 -3 -10 0.12 0.13
 5 -3 11 -0.03 0.09
 5 -3 11 0.2 0.09
 -5 -4 11 0.43 0.1
 -5 -4 11 0.77 0.14
 5 -4 -11 0.32 0.1
 5 -4 -10 0.45 0.16
 -5 -4 10 0.53 0.18
 -5 4 9 3.55 0.3
 5 -4 -9 3.05 0.28
 -5 -4 9 3.53 0.38
 5 -4 -9 3.47 0.4
 -5 4 8 11.08 0.67
 5 -4 -8 11.05 0.66
 -5 4 7 2.12 0.27
 5 -4 -7 1.77 0.26
 -5 4 6 8.7 0.54
 -5 4 6 6.64 0.86
 -5 -4 6 8.65 0.9
 -5 4 5 3.76 0.56
 -5 -4 5 3.24 0.57
 -5 -4 5 4.58 0.58
 -5 4 4 27.72 1.66
 -5 4 4 28.81 1.81
 -5 4 4 29.18 2.13
 -5 -4 4 28.51 1.59
 -5 -4 4 30.5 1.93
 5 4 -3 0.7 0.28
 -5 4 3 0.42 0.23
 -5 4 3 0.49 0.2
 -5 -4 3 0.54 0.2
 -5 -4 3 0.45 0.19
 5 -4 -3 0.65 0.32
 -5 4 2 8.36 0.82
 5 4 -2 7.59 0.75
 -5 4 2 7.85 0.63
 5 -4 -2 7.17 0.76
 -5 -4 2 7.68 0.52
 -5 -4 2 7.18 0.6
 5 4 -1 7.38 0.67
 -5 4 1 6.37 0.6
 -5 4 1 6.75 0.73
 5 -4 -1 6.96 0.7
 -5 -4 1 6.94 0.54
 -5 -4 1 6.3 0.65
 -5 4 0 6.67 0.69
 -5 4 0 5.16 0.53
 5 4 0 5.86 0.64
 5 -4 0 5.7 0.6
 -5 -4 0 5.82 0.62
 -5 4 -1 119.62 5.5
 5 4 1 120.36 6.29
 -5 4 -1 126.34 7.21
 5 -4 1 123.58 6.18
 -5 -4 -1 124.53 7.2
 -5 4 -2 2.02 0.33
 5 4 2 2.15 0.4
 -5 4 -2 2.12 0.44
 -5 -4 -2 1.86 0.42
 -5 4 -3 53.73 3.37
 5 4 3 52.6 2.99
 -5 4 -3 55.84 2.68
 -5 -4 -3 50.24 3.45
 5 4 4 0.54 0.28
 5 -4 4 -0.02 0.16
 -5 -4 -4 0.14 0.29
 -5 -4 -5 2.68 0.64
 5 -4 5 3.73 0.55
 -5 4 -6 4.63 0.37
 5 4 6 4.91 0.44
 5 -4 6 4.66 0.68
 -5 -4 -6 4.81 1.08
 5 4 7 8.16 0.51
 -5 4 -7 8.54 0.52
 5 4 7 7.82 0.56
 -5 -4 -7 10.17 1.17
 -5 -4 -7 8.53 0.54
 5 4 8 5.68 0.47
 -5 -4 -8 6.42 0.58
 -5 -4 -8 6.24 1.22
 -5 -4 -8 5.81 0.42
 5 4 9 0.31 0.16
 5 -4 9 0.28 0.25
 -5 -4 -9 0 0.14
 5 4 10 2.71 0.2
 -5 -4 -10 2.46 0.28
 5 -4 10 2.42 0.27
 5 -5 -10 0.1 0.12
 -5 -5 10 0.07 0.15
 -5 -5 9 0.1 0.19
 5 -5 -9 -0.15 0.11
 -5 5 8 -0.05 0.08
 5 -5 -8 -0.08 0.13
 5 5 -7 16.26 0.82
 -5 5 7 16.46 0.84
 5 -5 -7 16.87 0.92
 -5 5 6 2.51 0.24
 -5 5 5 1.48 0.45
 -5 5 5 1.17 0.35
 -5 -5 5 1.37 0.39
 -5 5 4 2.86 0.52
 -5 5 4 1.89 0.4
 -5 5 4 3.42 0.66
 -5 -5 4 2.69 0.4
 -5 5 3 29.55 1.86
 -5 5 3 28.61 1.7
 5 5 -3 31.66 1.93
 -5 5 3 30.99 2.26
 -5 5 2 2.23 0.47
 5 5 -2 1.67 0.37
 -5 5 2 2.42 0.41
 5 -5 -2 2.49 0.46
 5 5 -1 21.89 1.57
 -5 5 1 23.82 1.4
 -5 5 1 26.65 1.9
 -5 -5 1 26.09 1.75
 5 -5 -1 24.17 1.61
 5 5 0 3.88 0.55
 -5 5 0 3.61 0.59
 -5 5 0 3.79 0.47
 5 -5 0 4 0.52
 -5 -5 0 4.03 0.6
 5 5 1 4.5 0.59
 -5 5 -1 4.29 0.51
 -5 5 -1 3.83 0.61
 5 -5 1 4.17 0.52
 5 5 2 2.48 0.47
 -5 5 -2 3.06 0.55
 -5 5 -2 2.64 0.43
 -5 5 -3 7.68 0.79
 -5 5 -3 8.24 0.96
 -5 -5 -3 9.96 1.12
 -5 -5 -4 -0.11 0.2
 5 -5 4 0.02 0.15
 5 5 5 5.8 0.42
 -5 -5 -5 6.47 1.06
 5 -5 5 5.47 0.7
 5 5 6 16.99 0.97
 -5 5 -6 19.96 0.88
 -5 -5 -6 18.34 0.99
 5 5 7 9.06 0.58
 -5 5 -7 9.17 0.54
 -5 -5 -7 8.59 0.58
 -5 -5 -7 8.75 1.05
 5 5 8 13.19 0.75
 -5 5 -8 14.03 0.72
 -5 -5 -8 13.21 0.73
 -5 -5 -8 13.05 1.54
 5 5 9 0.94 0.12
 -5 -5 -9 1.07 0.25
 -5 -5 -9 0.51 0.24
 -5 -5 -10 2.71 0.29
 5 -5 10 2.35 0.27
 -5 -6 10 -0.02 0.11
 5 -6 -10 -0.02 0.11
 5 -6 -9 1.1 0.19
 5 6 -8 -0.02 0.11
 5 -6 -8 0.25 0.16
 5 6 -7 0.26 0.14
 5 -6 -7 0.19 0.21
 5 6 -6 1.41 0.21
 5 6 -5 1.69 0.2
 -5 6 5 1.05 0.44
 -5 6 5 1.5 0.43
 -5 6 4 0.18 0.21
 -5 6 4 0.17 0.24
 -5 6 4 0.54 0.3
 -5 6 3 3.8 0.75
 5 6 -3 4.23 0.73
 -5 6 3 4.44 0.65
 -5 6 3 3.56 0.53
 5 6 -2 8.7 0.96
 -5 6 2 8.86 0.93
 -5 6 2 8.88 1.1
 -5 6 2 10.39 0.82
 5 6 -2 9.79 0.98
 -5 6 1 0.34 0.34
 5 6 -1 0.44 0.34
 5 6 -1 0.54 0.31
 -5 6 1 0.54 0.32
 -5 6 1 0.68 0.27
 5 -6 -1 0.63 0.25
 -5 -6 1 -0.02 0.23
 5 6 0 16.23 1.27
 -5 6 0 15.28 1.08
 -5 6 0 17.86 1.46
 5 6 0 14.41 1.17
 5 -6 0 16.51 1.24
 -5 6 -1 21.72 1.74
 -5 6 -1 22.64 1.37
 5 6 1 21.77 1.45
 -5 6 -2 13.51 1.28
 -5 6 -2 14.6 1.03
 5 6 2 13.96 1.11
 -5 6 -3 12.47 0.98
 5 -6 3 12.42 0.97
 -5 -6 -4 4.76 0.9
 5 -6 4 5.3 0.71
 5 6 5 7.28 0.61
 5 6 5 5.75 0.36
 -5 6 -5 5.83 0.37
 5 6 6 6.72 0.73
 5 6 6 6.19 0.38
 -5 6 -6 6.09 0.39
 -5 -6 -6 6.98 0.56
 -5 6 -7 0.39 0.14
 5 6 7 0.55 0.1
 -5 -6 -7 0.7 0.21
 -5 -6 -7 0.98 0.6
 -5 6 -8 0.13 0.11
 -5 -6 -8 -0.03 1.13
 -5 -6 -8 0.01 0.13
 -5 6 -9 -0.17 0.11
 -5 -6 -9 -0.24 0.14
 -5 -6 -9 0.31 0.23
 5 -6 10 1.49 0.2
 -5 -6 -10 1.15 0.2
 -5 -7 10 0.25 0.13
 5 7 -9 4.09 0.34
 5 -7 -9 4.25 0.33
 5 7 -8 3.04 0.3
 5 -7 -8 2.46 0.3
 5 7 -7 0.72 0.18
 5 -7 -7 0.62 0.25
 5 7 -6 0.38 0.13
 -5 7 5 0.63 0.32
 5 7 -5 0.59 0.14
 -5 7 5 0.75 0.16
 -5 7 4 0.71 0.4
 -5 7 4 0.38 0.11
 -5 7 4 0.13 0.23
 -5 7 3 -0.05 0.25
 -5 7 3 0.05 0.3
 -5 7 3 -0.12 0.27
 5 7 -3 -0.6 0.7
 5 7 -2 6.26 0.99
 -5 7 2 5.71 0.78
 -5 7 2 7.75 1.09
 -5 7 2 5.62 0.72
 -5 7 1 -0.2 0.2
 -5 7 1 0.32 0.32
 -5 7 1 -0.1 0.24
 5 7 -1 0.19 0.29
 -5 7 0 7.98 1.11
 5 7 0 9.37 0.98
 -5 7 0 9.65 0.96
 -5 7 0 9.6 0.9
 5 7 1 0.17 0.2
 -5 7 -1 0.55 0.39
 -5 7 -1 -0.12 0.25
 5 7 2 0.42 0.27
 -5 7 -2 0.1 0.28
 -5 7 -2 -0.03 0.27
 5 -7 3 14.18 1.13
 5 7 4 0.14 0.08
 -5 7 -4 0.17 0.09
 5 7 4 0.43 0.25
 -5 7 -5 0.95 0.15
 5 7 5 1.05 0.33
 -5 7 -6 7.69 0.47
 5 7 6 8.7 0.9
 -5 -7 -6 8.27 0.62
 -5 7 -7 1.65 0.23
 -5 -7 -7 2.41 0.59
 -5 -7 -7 1.65 0.28
 -5 7 -8 6.75 0.43
 -5 -7 -8 4.54 1.18
 -5 -7 -8 7.09 0.47
 -5 7 -9 1.31 0.18
 -5 -7 -9 0.9 0.21
 -5 -7 -9 0.48 0.61
 5 8 -9 2.63 0.24
 5 -8 -9 1.48 0.19
 5 8 -8 -0.01 0.08
 5 -8 -8 0.27 0.15
 5 8 -7 7.56 0.45
 5 -8 -7 6.8 0.53
 5 8 -6 1.04 0.19
 -5 8 6 1.38 0.52
 5 8 -5 3.27 0.29
 -5 8 5 3.59 0.7
 -5 8 5 3.22 0.31
 -5 8 4 2.09 0.31
 -5 8 4 0.62 0.15
 5 8 -4 0.76 0.16
 -5 8 4 0.67 0.36
 -5 8 3 6.42 0.88
 5 8 -3 6.21 0.42
 -5 8 3 6.24 0.38
 5 8 -3 7.35 1.24
 -5 8 3 7.88 0.64
 -5 8 2 4.4 0.85
 -5 8 2 4.25 0.72
 5 8 -2 5.43 1.05
 -5 8 2 4.51 0.52
 -5 8 1 6.48 0.83
 -5 8 1 5.88 0.97
 5 8 -1 5.1 0.79
 -5 8 1 5.38 0.75
 -5 8 0 1.1 0.37
 5 8 0 1.32 0.45
 -5 8 0 0.11 0.44
 -5 -8 0 0.85 0.51
 -5 8 -1 -0.24 0.19
 5 8 1 -0.12 0.19
 -5 8 -1 0.18 0.44
 5 8 2 10.14 0.53
 5 8 2 9.4 0.76
 5 8 2 11.82 1.16
 -5 8 -2 10.03 1.03
 5 8 3 1.47 0.32
 5 8 3 1.28 0.2
 5 8 4 3.37 0.32
 5 8 4 3.63 0.49
 -5 8 -4 3.64 0.24
 -5 8 -5 1.17 0.16
 5 8 5 1.29 0.43
 -5 8 -6 0.55 0.14
 5 8 6 0.84 0.56
 -5 8 -7 -0.07 0.08
 -5 -8 -7 -0.04 0.16
 -5 -8 -7 -0.07 0.54
 -5 8 -8 0.09 0.09
 -5 -8 -8 -0.08 0.13
 -5 -8 -8 -0.47 0.99
 -5 8 -9 0.12 0.08
 -5 -8 -9 -0.01 0.2
 -5 -8 -9 -0.14 0.44
 5 9 -9 0.15 0.09
 5 -9 -9 0.01 0.09
 5 9 -8 0.22 0.09
 5 -9 -8 0.38 0.13
 -5 9 7 -0.09 0.33
 5 9 -7 -0.08 0.1
 5 -9 -7 0.16 0.19
 5 9 -6 0.56 0.14
 -5 9 6 0.09 0.35
 -5 9 6 0.23 0.13
 5 9 -5 0.09 0.11
 -5 9 5 0.31 0.32
 -5 9 5 0.53 0.22
 -5 9 5 0.05 0.1
 -5 9 4 1.42 0.21
 5 9 -4 1.48 0.18
 -5 9 4 1.26 0.31
 -5 9 4 1.75 0.55
 5 9 -3 2.33 0.29
 -5 9 3 1.65 0.2
 -5 9 3 2.11 0.41
 -5 9 3 1.61 0.53
 -5 9 2 -0.07 0.32
 -5 9 2 0.01 0.23
 5 9 -2 -0.02 0.23
 5 9 -2 0.74 0.68
 5 9 -2 -0.1 0.22
 -5 9 2 -0.03 0.09
 5 9 -1 5.45 0.35
 -5 9 1 5.48 0.6
 5 9 -1 5.94 0.89
 -5 9 1 5.27 0.32
 -5 9 1 8.16 1
 5 9 0 0.01 0.1
 -5 9 0 -0.04 0.25
 5 9 0 -0.09 0.24
 5 9 1 10.88 0.56
 -5 9 -1 12.03 0.87
 5 9 1 10.66 1.2
 5 9 2 0.78 0.27
 5 9 2 0.72 0.15
 5 9 2 0.58 0.34
 5 9 3 0.19 0.26
 5 9 3 0.25 0.12
 5 9 4 2.29 0.43
 5 9 4 2.18 0.26
 -5 9 -4 2.08 0.2
 5 9 5 5.88 0.76
 -5 9 -5 6.75 0.38
 5 9 5 7.14 0.46
 5 9 6 3.21 0.7
 -5 9 -6 3.69 0.29
 -5 9 -7 3.9 0.3
 -5 -9 -7 4.43 0.39
 -5 -9 -7 2.84 0.73
 -5 9 -8 0.76 0.13
 -5 -9 -8 0.57 0.15
 -5 -9 -8 0.93 0.9
 5 10 -8 2.07 0.19
 5 -10 -8 1.82 0.22
 -5 10 7 0.31 0.35
 5 10 -7 -0.02 0.07
 -5 10 7 0.14 0.12
 5 -10 -7 -0.22 0.18
 -5 10 6 2.37 0.52
 -5 10 6 2.2 0.37
 5 10 -6 2.83 0.25
 -5 10 6 2.77 0.28
 5 10 -5 0.41 0.13
 -5 10 5 0.22 0.23
 -5 10 5 0.47 0.4
 -5 10 5 0.46 0.14
 -5 10 4 3.92 0.33
 -5 10 4 4.17 0.55
 -5 10 4 4.73 0.76
 5 10 -4 3.94 0.28
 -5 10 3 0.07 0.09
 -5 10 3 0.34 0.23
 -5 10 3 0.37 0.41
 5 10 -3 0.16 0.22
 5 10 -2 3.41 0.35
 5 10 -2 3.94 1.17
 -5 10 2 3.16 0.26
 -5 10 2 1.95 0.39
 -5 10 2 3.47 0.71
 -5 10 1 0.51 0.44
 -5 10 1 0.66 0.12
 5 10 -1 -0.13 0.72
 5 10 -1 0.67 0.26
 -5 10 1 0.44 0.24
 -5 10 0 3.56 0.52
 5 10 0 2.92 0.64
 5 10 0 3.99 0.31
 5 10 1 -0.27 0.24
 5 10 1 0.22 0.1
 -5 10 -1 0.27 0.29
 5 10 2 2.65 0.41
 5 10 2 2.87 0.62
 5 10 2 2.38 0.25
 5 10 3 2.25 0.25
 5 10 3 2.32 0.6
 5 10 3 1.98 0.42
 -5 10 -4 0.03 0.07
 5 10 4 -0.16 0.35
 5 10 4 0.03 0.37
 5 10 4 0.12 0.11
 5 10 5 0.73 0.43
 5 10 5 0.95 0.19
 -5 10 -5 1.5 0.16
 -5 10 -6 0.32 0.11
 5 10 6 1.01 0.46
 -5 10 -7 0.25 0.09
 -5 -10 -7 0.78 0.74
 -5 -10 -7 0.25 0.15
 -5 10 -8 0.04 0.07
 -5 -10 -8 0.22 0.16
 -5 -10 -8 0.66 0.68
 5 11 -7 0.24 0.08
 -5 11 7 0.49 0.17
 -5 11 7 0.17 0.12
 5 -11 -7 0.21 0.14
 5 11 -6 -0.1 0.08
 -5 11 6 0.17 0.23
 -5 11 6 -0.15 0.1
 -5 11 6 -0.07 0.09
 5 11 -5 0.55 0.13
 -5 11 5 0.04 0.35
 -5 11 5 0.78 0.25
 -5 11 5 0.35 0.12
 -5 11 4 0.02 0.09
 -5 11 4 0.29 0.22
 5 11 -4 0.06 0.09
 -5 11 4 -0.08 0.2
 -5 11 3 0.28 0.11
 5 11 -3 0.58 0.16
 -5 11 3 0.27 0.38
 -5 11 3 0.46 0.22
 -5 11 2 0.5 0.13
 5 11 -2 1.1 0.26
 -5 11 2 0.54 0.28
 5 11 -2 0.15 1
 -5 11 2 -0.07 0.37
 -5 11 1 0.22 0.27
 5 11 -1 0.93 0.29
 -5 11 1 0.57 0.13
 5 11 -1 2.59 1.1
 5 11 -1 0.44 0.27
 -5 11 1 0.27 0.43
 5 11 0 1.57 0.7
 5 11 0 2.05 0.29
 -5 11 0 1.96 0.18
 -5 11 0 1.56 0.37
 5 11 1 2.18 0.25
 5 11 1 2.63 0.6
 5 11 2 1.79 0.37
 5 11 2 1.74 0.59
 5 11 2 1.69 0.23
 5 11 3 0.31 0.41
 5 11 3 -0.08 0.11
 5 11 3 0.32 0.37
 5 11 4 -0.05 0.38
 -5 11 -4 0.23 0.08
 5 11 4 0.36 0.13
 5 11 4 0.44 0.55
 5 11 5 0.35 0.36
 5 11 5 0.53 0.63
 5 11 5 -0.08 0.11
 -5 11 -6 0.38 0.09
 5 11 6 -0.03 0.16
 -5 -11 -6 0.04 0.41
 -5 -11 -7 0 0.11
 -5 -11 -7 0.75 0.71
 5 12 -6 2.5 0.17
 -5 12 6 1.88 0.28
 -5 12 6 2.28 0.21
 -5 12 5 0.24 0.16
 -5 12 5 0.12 0.09
 5 12 -5 0.14 0.08
 5 12 -4 0.49 0.11
 -5 12 4 0.73 0.41
 -5 12 4 0.31 0.18
 -5 12 4 0.42 0.11
 -5 12 3 0.39 0.19
 -5 12 3 -0.06 0.33
 -5 12 3 0.4 0.12
 5 12 -3 0.24 0.09
 5 12 -2 -0.14 0.19
 -5 12 2 0.01 0.07
 -5 12 2 -0.18 0.36
 -5 12 2 0.15 0.23
 5 12 -1 1.62 0.3
 -5 12 1 1.21 0.15
 -5 12 1 1.23 0.32
 5 12 -1 0.12 0.95
 5 12 0 3.76 0.39
 5 12 0 3.62 1.14
 -5 12 0 3.62 0.45
 -5 12 0 3.37 0.22
 5 12 1 0.17 0.24
 5 12 1 -0.49 0.6
 5 12 2 0.08 0.15
 5 12 2 0.62 0.46
 5 12 3 0.29 0.57
 5 12 3 0.14 0.36
 5 12 3 0.59 0.19
 5 12 4 0.27 0.38
 5 12 4 0.67 0.6
 5 12 4 0.61 0.2
 5 12 5 0.46 0.19
 -5 -12 -5 0.2 0.26
 5 12 6 0.16 0.2
 -5 -12 -6 0.21 0.14
 -5 -12 -6 0.65 0.55
 -5 13 5 -0.07 0.13
 -5 13 5 0.2 0.09
 5 13 -4 0.39 0.08
 -5 13 4 0.6 0.1
 -5 13 4 0.29 0.18
 -5 13 3 3.27 0.41
 -5 13 3 3.92 0.25
 5 13 -3 3.64 0.22
 -5 13 2 0.6 0.1
 -5 13 2 0.85 0.25
 5 13 -2 0.56 0.1
 5 13 -1 5.9 1.2
 -5 13 1 8.05 0.63
 -5 13 1 7 0.35
 5 13 -1 7.2 0.44
 5 13 0 -0.09 0.22
 5 13 0 0.04 0.61
 5 13 1 0.4 0.27
 5 13 1 0.09 0.25
 5 13 1 -0.07 0.86
 5 13 2 -0.28 0.77
 5 13 2 0.56 0.27
 5 13 3 0.26 0.25
 5 13 4 0.52 0.25
 -5 14 2 1.12 0.1
 -5 14 2 1.04 0.2
 5 14 -1 0.27 0.05
 5 14 0 1.9 0.18
 5 14 1 -0.02 0.17
 5 14 2 1.98 0.25
 -6 0 11 -0.05 0.09
 -6 0 10 5.57 0.4
 -6 0 10 6.14 0.48
 -6 0 10 5.48 0.31
 -6 0 9 -0.15 0.12
 -6 0 9 -0.22 0.15
 6 0 -9 0.11 0.12
 6 0 -8 1.28 0.24
 -6 0 8 1.66 0.23
 -6 0 7 -0.1 0.17
 6 0 -7 -0.24 0.13
 -6 0 6 8.85 0.91
 -6 0 5 -0.08 0.14
 6 0 -4 47.11 2.89
 -6 0 3 0.04 0.11
 -6 0 3 -0.14 0.11
 6 0 -3 0.46 0.52
 6 0 -3 0.44 0.49
 -6 0 2 0 0.1
 6 0 -2 -0.05 0.29
 -6 0 2 0.05 0.14
 6 0 -2 -0.1 0.22
 6 0 -1 0.21 0.25
 -6 0 1 0.02 0.09
 -6 0 1 -0.09 0.15
 6 0 -1 0.34 0.28
 6 0 0 68.95 3.57
 -6 0 0 67.99 4.08
 -6 0 0 66.88 3.04
 6 0 0 68.56 3.96
 -6 0 -1 0.02 0.17
 6 0 1 -0.18 0.11
 6 0 1 -0.04 0.12
 -6 0 -1 0 0.1
 -6 0 -2 43.51 1.97
 6 0 2 43.14 2.52
 -6 0 -2 37.72 2.71
 6 0 2 41.22 2.23
 6 0 3 -0.02 0.08
 6 0 3 -0.04 0.13
 6 0 3 -0.08 0.11
 -6 0 -3 -0.19 0.33
 -6 0 -4 1.06 0.64
 6 0 4 0.83 0.27
 6 0 4 0.88 0.23
 6 0 5 0.26 0.22
 6 0 5 0.14 0.24
 -6 0 -5 0.16 0.62
 -6 0 -7 -0.02 0.12
 6 0 7 -0.12 0.17
 6 0 8 3.02 0.37
 6 0 8 3.99 0.37
 -6 0 -8 3.54 0.34
 -6 0 -9 -0.05 0.07
 6 0 9 0.14 0.12
 6 0 9 -0.03 0.12
 6 0 10 2.06 0.21
 6 0 10 1.88 0.29
 6 0 10 2.29 0.26
 6 0 11 -0.02 0.1
 6 0 11 -0.05 0.07
 -6 1 11 0.05 0.09
 -6 -1 11 -0.08 0.07
 -6 -1 11 0.07 0.14
 -6 1 10 0.51 0.12
 -6 1 10 0.88 0.18
 6 -1 -10 1.02 0.15
 -6 -1 10 0.93 0.22
 -6 -1 10 0.81 0.14
 -6 -1 10 0.83 0.18
 -6 1 9 1.39 0.26
 -6 1 9 0.78 0.19
 6 1 -9 0.83 0.12
 -6 1 9 0.69 0.14
 6 -1 -9 1.28 0.22
 -6 -1 9 1.04 0.19
 6 1 -8 0.1 0.11
 -6 1 8 -0.02 0.13
 -6 1 8 0 0.14
 -6 -1 8 0.08 0.17
 6 -1 -8 0.01 0.15
 -6 1 7 0.21 0.14
 6 1 -7 0.32 0.16
 6 -1 -7 0.05 0.19
 6 -1 -7 0.19 0.15
 -6 -1 7 0.3 0.22
 -6 1 6 0.13 0.2
 -6 -1 6 0.29 0.25
 -6 1 5 2.48 0.45
 -6 -1 5 3.17 0.46
 6 -1 -5 0.29 0.98
 6 -1 -5 0.13 0.75
 -6 -1 5 3.67 0.52
 -6 1 4 2.01 0.34
 6 1 -4 2.34 0.48
 -6 -1 4 2.32 0.34
 6 -1 -4 0.09 0.42
 -6 -1 4 1.88 0.35
 6 -1 -4 0.54 0.41
 -6 1 3 79.83 4.74
 6 1 -3 81.34 4.49
 -6 1 3 84.23 3.73
 6 1 -3 85.29 4.28
 -6 -1 3 73.98 4.62
 -6 -1 3 79.35 3.67
 6 1 -2 0.47 0.16
 -6 1 2 0.36 0.15
 -6 1 2 0.75 0.24
 6 1 -2 0.3 0.21
 -6 -1 2 0.37 0.15
 -6 -1 2 0.57 0.18
 6 -1 -2 0.12 0.16
 6 -1 -2 0.09 0.13
 -6 1 1 35.79 1.75
 6 1 -1 37.93 2.12
 -6 1 1 33.84 2.29
 6 1 -1 36.07 2.05
 -6 -1 1 35.38 2.28
 -6 -1 1 35.97 1.7
 -6 1 0 5.29 0.62
 6 1 0 5.48 0.44
 -6 1 0 5.42 0.43
 6 1 0 4.44 0.49
 -6 -1 0 3.58 0.54
 -6 -1 0 5.54 0.36
 6 1 1 0.25 0.13
 -6 1 -1 -0.08 0.19
 6 1 1 0 0.1
 -6 1 -1 0.01 0.09
 6 -1 1 0.12 0.2
 6 -1 1 -0.12 0.1
 -6 -1 -1 -0.02 0.15
 -6 -1 -1 0.1 0.09
 6 1 2 16.81 1.12
 6 1 2 15.76 0.86
 6 1 2 15.53 1.04
 -6 1 -2 16.48 1.28
 -6 1 -2 16.58 0.93
 6 -1 2 16.39 1
 6 -1 2 17.45 1.15
 6 1 3 0 0.14
 6 1 3 0.31 0.12
 6 1 3 0.1 0.17
 -6 1 -3 0.4 0.29
 -6 -1 -3 -0.16 0.28
 6 -1 3 -0.01 0.16
 6 -1 3 -0.06 0.14
 -6 1 -4 21.54 1.64
 6 1 4 18.88 1.42
 6 1 4 21.25 1.18
 6 -1 4 20.34 1.46
 6 -1 4 22.58 1.27
 6 1 5 1.25 0.34
 6 -1 5 1.12 0.34
 -6 -1 -5 1.55 1.02
 6 -1 5 1.49 0.33
 6 -1 6 1.13 0.41
 -6 1 -7 0.02 0.11
 6 1 7 0.04 0.15
 6 1 7 0.16 0.15
 -6 -1 -7 0.14 0.12
 6 -1 7 0.37 0.24
 6 1 8 0.33 0.15
 6 1 8 0.14 0.17
 -6 1 -8 0.39 0.1
 -6 -1 -8 0.68 0.18
 6 -1 8 0.3 0.2
 6 1 9 -0.16 0.11
 6 1 9 -0.08 0.12
 6 1 9 -0.04 0.17
 6 -1 9 0 0.18
 -6 -1 -9 0.11 0.12
 6 -1 9 -0.23 0.12
 6 1 10 2.04 0.3
 6 1 10 2.39 0.26
 6 -1 10 2.85 0.3
 6 -1 10 2.55 0.25
 6 1 11 0.36 0.13
 6 -1 11 0.52 0.12
 6 -1 11 0.21 0.17
 -6 -2 11 1.35 0.22
 -6 -2 11 1.29 0.15
 -6 2 10 0.32 0.13
 6 -2 -10 0.42 0.13
 -6 -2 10 0.84 0.18
 -6 -2 10 0.25 0.14
 -6 2 9 5.37 0.48
 -6 2 9 6.16 0.4
 -6 -2 9 5.71 0.44
 6 -2 -9 5.67 0.51
 -6 2 8 3.56 0.27
 6 2 -8 3.57 0.27
 -6 2 8 3.96 0.42
 -6 2 8 3.09 0.33
 -6 -2 8 3.62 0.39
 6 -2 -8 3.57 0.31
 6 -2 -8 3.59 0.43
 -6 2 7 1.52 0.21
 -6 2 7 2.32 0.33
 6 2 -7 1.28 0.21
 -6 -2 7 1.74 0.27
 6 -2 -7 1.54 0.34
 6 -2 -7 1.82 0.26
 -6 2 6 0.36 0.27
 -6 -2 6 0.02 0.2
 -6 2 5 1.26 0.36
 6 -2 -5 -0.14 0.5
 -6 -2 5 1.39 0.35
 -6 -2 5 1.47 0.32
 -6 2 4 24.89 1.76
 -6 2 4 24.83 1.46
 6 2 -4 24.02 1.6
 -6 -2 4 24.37 1.67
 -6 -2 4 24.18 1.38
 -6 2 3 58.59 3.55
 6 2 -3 55.82 3.15
 -6 2 3 56.03 2.76
 -6 -2 3 58.44 3.42
 -6 -2 3 57.9 2.71
 -6 2 2 0.8 0.25
 -6 2 2 0.76 0.21
 6 2 -2 0.59 0.21
 -6 -2 2 0.98 0.24
 6 -2 -2 0.5 0.2
 -6 -2 2 0.77 0.17
 6 -2 -2 0.6 0.21
 -6 2 1 1.31 0.25
 6 2 -1 0.78 0.22
 -6 2 1 1.44 0.32
 6 -2 -1 0.57 0.19
 -6 -2 1 1.16 0.18
 -6 -2 1 0.84 0.28
 6 -2 -1 0.75 0.23
 6 2 0 2.83 0.4
 6 2 0 2.49 0.19
 -6 2 0 2.86 0.46
 -6 2 0 2.41 0.32
 -6 -2 0 2.31 0.2
 -6 -2 0 1.24 0.35
 6 2 1 12.69 0.76
 -6 2 -1 12 1
 -6 2 -1 10.82 0.73
 6 2 1 12.71 0.88
 -6 -2 -1 8.24 0.96
 -6 2 -2 15.03 0.93
 -6 2 -2 16.05 1.24
 6 2 2 16.03 1
 6 2 2 16.04 1.05
 6 -2 2 16.37 0.96
 6 -2 2 13.11 1.1
 -6 -2 -2 13.07 1.25
 -6 2 -3 0.02 0.17
 6 2 3 0.21 0.2
 -6 2 -3 0.23 0.17
 6 2 3 0.3 0.16
 6 -2 3 0.21 0.17
 -6 -2 -3 0.26 0.24
 -6 2 -4 49.02 3.33
 6 2 4 55.36 3.09
 6 -2 4 54.16 2.62
 6 -2 4 48.48 3.16
 6 -2 5 6.27 0.7
 -6 -2 -5 2.96 0.84
 6 -2 5 6.99 0.77
 6 -2 6 3.87 0.63
 6 2 7 2.54 0.34
 6 2 7 1.26 0.25
 6 2 7 1.84 0.23
 -6 -2 -7 1.67 0.26
 -6 -2 -7 2.04 0.32
 -6 -2 -7 2.39 0.87
 6 2 8 1.48 0.29
 6 2 8 1.24 0.25
 6 2 8 1.25 0.2
 -6 -2 -8 0.72 0.2
 6 -2 8 1.2 0.23
 6 2 9 0.37 0.16
 6 2 9 0.54 0.2
 6 -2 9 0.43 0.22
 6 -2 9 0.64 0.18
 -6 -2 -9 0.22 0.14
 6 2 10 1.39 0.22
 6 -2 10 1.52 0.21
 6 -2 10 1.97 0.25
 -6 -2 -10 1.13 0.14
 6 2 11 1.69 0.17
 6 -2 11 2.19 0.2
 -6 -3 11 -0.03 0.08
 -6 -3 11 -0.08 0.08
 -6 3 10 0.41 0.11
 6 -3 -10 0.49 0.14
 -6 -3 10 0.36 0.15
 -6 3 9 0.76 0.17
 -6 -3 9 0.96 0.22
 6 -3 -9 0.99 0.21
 -6 3 8 5.75 0.36
 -6 3 8 5.64 0.49
 6 -3 -8 6.11 0.44
 6 -3 -8 5.5 0.57
 -6 -3 8 5.68 0.51
 -6 3 7 11.55 0.73
 -6 3 7 10.75 0.63
 6 -3 -7 12.54 0.7
 6 3 -6 2.36 0.22
 -6 3 6 2.76 0.33
 -6 3 6 2.1 0.45
 -6 -3 6 2.57 0.52
 -6 3 5 0.37 0.26
 6 -3 -5 -0.24 0.29
 -6 -3 5 0.25 0.25
 -6 -3 5 0.34 0.25
 -6 3 4 4.86 0.67
 -6 3 4 4.18 0.65
 -6 3 4 4.3 0.54
 6 -3 -4 4.9 0.66
 -6 -3 4 4.09 0.5
 6 -3 -4 4.04 0.63
 -6 -3 4 3.74 0.53
 -6 3 3 -0.07 0.11
 -6 3 3 0.03 0.23
 6 3 -3 -0.12 0.2
 -6 -3 3 0.31 0.21
 -6 -3 3 0.09 0.15
 6 -3 -3 0.04 0.22
 6 3 -2 1.18 0.28
 -6 3 2 1.41 0.3
 -6 3 2 0.99 0.32
 6 -3 -2 1.39 0.32
 -6 -3 2 1.23 0.25
 -6 -3 2 1.53 0.32
 -6 -3 2 1.34 0.23
 -6 3 1 0.04 0.12
 -6 3 1 0.12 0.16
 6 3 -1 -0.02 0.17
 -6 -3 1 0.01 0.12
 6 -3 -1 0.22 0.15
 6 3 0 8.06 0.74
 -6 3 0 9.3 0.89
 -6 3 0 10.41 0.7
 -6 -3 0 8.36 0.85
 6 -3 0 10.19 0.76
 -6 3 -1 15.94 1.01
 6 3 1 16.58 1.17
 -6 3 -1 17.75 1.37
 -6 -3 -1 19.13 1.41
 6 3 2 7.39 0.7
 -6 3 -2 8.21 0.64
 -6 3 -2 8.64 0.85
 -6 -3 -2 9.38 0.9
 -6 3 -3 42.81 2.84
 6 3 3 45.17 2.51
 -6 3 -3 39.26 2.19
 -6 -3 -3 42.81 2.93
 6 -3 3 45.27 2.67
 -6 -3 -4 -0.1 0.32
 6 -3 4 -0.06 0.19
 6 -3 4 0.07 0.22
 -6 -3 -5 0.52 0.52
 6 -3 5 0.62 0.25
 6 -3 5 0.62 0.32
 6 3 6 3.19 0.37
 6 -3 6 3.33 0.62
 -6 -3 -6 2.19 1.33
 -6 -3 -6 2.76 0.71
 6 3 7 0.66 0.18
 6 3 7 0.85 0.17
 6 3 7 1.17 0.24
 -6 -3 -7 0.67 0.2
 -6 -3 -7 0.52 0.17
 -6 -3 -7 -1.64 0.96
 6 3 8 0.72 0.22
 6 3 8 0.84 0.18
 -6 -3 -8 0.94 0.27
 -6 -3 -8 0.87 0.21
 6 3 9 0.14 0.15
 6 3 9 0.46 0.12
 6 -3 9 0.18 0.2
 -6 -3 -9 0.57 0.18
 6 3 10 0.18 0.1
 6 -3 10 0.05 0.12
 -6 -3 -10 -0.01 0.09
 6 -3 10 0.14 0.15
 6 -4 -10 4.63 0.37
 -6 -4 10 4.42 0.34
 -6 4 9 0.31 0.11
 6 -4 -9 0.15 0.14
 -6 -4 9 -0.22 0.16
 6 -4 -9 0.39 0.12
 -6 4 8 0.2 0.12
 6 -4 -8 0.11 0.14
 -6 4 7 0.03 0.13
 6 -4 -7 0.28 0.19
 -6 4 6 0.14 0.12
 -6 -4 6 0.06 0.23
 -6 4 5 -0.25 0.23
 -6 -4 5 -0.16 0.26
 -6 4 4 3.49 0.64
 -6 4 4 2.05 0.4
 -6 4 4 3.79 0.59
 -6 -4 4 3.44 0.5
 -6 -4 4 2.24 0.39
 -6 4 3 20.35 1.41
 -6 4 3 21.65 1.68
 -6 4 3 20.51 1.29
 6 4 -3 21.36 1.45
 6 -4 -3 20.46 1.5
 -6 -4 3 21.8 1.46
 -6 -4 3 20.6 1.17
 -6 4 2 1.35 0.31
 6 4 -2 1.32 0.32
 -6 4 2 1.92 0.44
 6 -4 -2 1.54 0.36
 -6 -4 2 1.3 0.28
 -6 4 1 39.19 2.46
 -6 4 1 37.29 1.87
 6 4 -1 35.49 2.11
 -6 -4 1 27.58 2.26
 6 -4 -1 38.43 2.14
 6 4 0 52.44 3.05
 -6 4 0 55.34 3.51
 -6 4 0 55.03 2.68
 6 -4 0 54.4 3.01
 -6 -4 0 57.21 3.48
 -6 4 -1 20.63 1.24
 -6 4 -1 19.45 1.57
 6 4 1 21.04 1.43
 -6 -4 -1 21.33 1.61
 6 -4 1 21.73 1.33
 -6 4 -2 2.5 0.47
 6 4 2 1.92 0.43
 -6 4 -2 2.51 0.4
 -6 -4 -2 2.09 0.48
 6 4 3 77.43 4.15
 -6 4 -3 74.08 4.68
 -6 4 -3 75.43 3.66
 -6 -4 -3 76.19 4.79
 6 -4 4 13.38 1
 -6 -4 -4 12.64 1.34
 -6 -4 -5 2.69 0.75
 6 -4 5 2.04 0.5
 6 4 6 5.03 0.46
 -6 4 -6 4.96 0.38
 -6 -4 -6 4.57 0.63
 -6 -4 -6 4.83 0.43
 -6 4 -7 0.91 0.19
 6 4 7 0.82 0.21
 6 4 7 0.67 0.16
 -6 -4 -7 0.85 0.72
 -6 -4 -7 0.79 0.19
 6 4 8 0.84 0.2
 -6 -4 -8 0.27 0.23
 -6 -4 -8 0.89 0.23
 -6 -4 -8 -0.03 0.93
 6 4 9 0.46 0.14
 -6 -4 -9 0.97 0.23
 6 -4 9 1.14 0.24
 6 4 10 0.13 0.07
 -6 -4 -10 0.21 0.12
 6 -4 10 0.48 0.16
 6 -5 -10 0.13 0.13
 -6 -5 10 0.04 0.11
 6 -5 -9 2.68 0.26
 -6 -5 9 2.82 0.34
 6 -5 -8 4.69 0.43
 -6 5 7 5.26 0.35
 6 -5 -7 5.84 0.5
 -6 5 6 8.61 0.5
 6 5 -6 9.68 0.51
 -6 5 5 2.16 0.51
 -6 5 5 2.94 0.24
 -6 5 5 2.85 0.56
 -6 5 4 0.52 0.29
 -6 5 4 0.61 0.31
 -6 5 4 0.22 0.3
 -6 -5 4 0.46 0.29
 6 5 -3 5.47 0.75
 -6 5 3 5.99 0.67
 6 5 -3 5.82 0.84
 -6 5 3 6.69 0.91
 -6 5 3 6.56 0.78
 -6 5 2 0.07 0.15
 6 5 -2 -0.29 0.49
 -6 5 2 0.23 0.22
 -6 5 2 -0.4 0.24
 6 5 -2 -0.26 0.13
 6 -5 -2 -0.18 0.28
 -6 5 1 14.26 1.27
 6 5 -1 13.08 1.08
 -6 5 1 13.93 0.97
 6 -5 -1 14.19 1.13
 -6 -5 1 13.94 1.18
 6 5 0 69.5 3.84
 -6 5 0 70.98 4.37
 -6 5 0 64.97 3.32
 6 -5 0 70.31 3.77
 -6 -5 0 69.04 4.29
 -6 5 -1 2.52 0.44
 -6 5 -1 3.12 0.56
 6 5 1 3.16 0.53
 -6 -5 -1 3.56 0.61
 6 -5 1 3.27 0.47
 6 5 2 85.79 4.62
 -6 5 -2 85.65 5.23
 -6 5 -2 81.07 4.01
 -6 -5 -2 86.05 5.28
 -6 5 -3 22.75 1.76
 -6 5 -3 21.43 1.39
 -6 -5 -3 20.81 1.81
 6 -5 4 4.12 0.6
 -6 -5 -4 4.5 0.81
 -6 5 -5 31.3 1.38
 6 5 5 31.27 1.97
 6 5 5 33.39 1.59
 6 -5 5 35.19 2.03
 -6 -5 -5 37.15 2.75
 -6 5 -6 3.53 0.31
 6 5 6 3.42 0.36
 -6 -5 -6 3.37 0.37
 -6 -5 -6 3.82 0.58
 -6 5 -7 0.43 0.15
 6 5 7 0.67 0.19
 -6 -5 -7 0.32 0.91
 -6 -5 -7 0.5 0.2
 6 5 8 0.54 0.15
 -6 5 -8 0.27 0.14
 -6 -5 -8 -0.21 0.18
 -6 -5 -8 0.58 1.11
 -6 -5 -8 0.1 0.18
 -6 -5 -9 0.59 0.21
 6 -5 10 0.78 0.15
 -6 -5 -10 0.45 0.14
 6 -6 -10 0.18 0.12
 -6 -6 10 0.18 0.14
 -6 -6 9 -0.05 0.17
 6 -6 -9 -0.03 0.13
 6 6 -8 4.85 0.41
 6 -6 -8 4.97 0.44
 6 6 -7 0.29 0.14
 6 -6 -7 0.1 0.2
 6 6 -6 9.97 0.56
 -6 6 5 0.93 0.41
 6 6 -5 0.44 0.12
 -6 6 4 1.48 0.39
 -6 6 4 1.26 0.47
 -6 6 4 1.63 0.43
 -6 6 3 1.23 0.39
 -6 6 3 1.65 0.54
 6 6 -3 1.15 0.55
 -6 6 3 1.09 0.41
 -6 6 2 0.43 0.25
 -6 6 2 0.36 0.22
 6 6 -2 0 0.58
 -6 6 2 0.04 0.24
 -6 6 1 0.5 0.23
 6 6 -1 -0.32 0.23
 -6 6 1 0.17 0.29
 -6 6 1 0.24 0.35
 -6 -6 1 0.7 0.32
 6 6 0 20.83 1.46
 -6 6 0 21.93 1.78
 -6 6 0 19.89 1.33
 6 -6 0 21.15 1.53
 -6 -6 0 23.03 1.73
 -6 6 -1 10.61 1.09
 6 6 1 11.32 1.07
 -6 6 -1 8.25 0.84
 -6 -6 -1 11.07 1.09
 6 6 2 1.49 0.4
 -6 6 -2 1.03 0.31
 -6 6 -2 1.14 0.45
 -6 -6 -2 1.08 0.44
 -6 6 -3 8.34 0.86
 -6 -6 -3 7.74 1.07
 6 6 4 13.14 0.89
 -6 -6 -4 8.57 1.3
 6 -6 4 8.29 0.92
 -6 6 -5 11.77 0.59
 6 6 5 11.59 0.61
 6 6 5 12.89 1.08
 6 6 6 7.44 0.86
 6 6 6 7.7 0.44
 -6 6 -6 7.7 0.46
 -6 -6 -6 8.23 0.55
 -6 6 -7 0.81 0.17
 -6 -6 -7 0.55 0.18
 -6 -6 -7 0.88 0.64
 -6 -6 -8 1.59 1.14
 -6 6 -9 0.56 0.15
 -6 -6 -9 -0.01 0.44
 -6 -6 -9 0.07 0.17
 6 -6 10 1.95 0.21
 -6 -6 -10 2.07 0.22
 6 7 -9 2.4 0.25
 6 -7 -9 2.43 0.24
 6 7 -8 5.31 0.42
 6 -7 -8 5.92 0.44
 6 7 -7 0.02 0.12
 6 -7 -7 0.07 0.21
 6 7 -6 6.44 0.42
 6 7 -5 2.06 0.23
 -6 7 5 2.08 0.51
 -6 7 5 2.27 0.25
 6 7 -4 0.31 0.09
 -6 7 4 0.11 0.21
 -6 7 4 -0.15 0.35
 -6 7 4 0.14 0.12
 6 7 -3 1.22 0.62
 -6 7 3 0.26 0.27
 -6 7 3 0.59 0.48
 -6 7 3 0.45 0.27
 -6 7 2 21.77 1.42
 -6 7 2 19.49 1.84
 6 7 -2 19.28 1.7
 -6 7 2 19.71 1.43
 -6 7 1 0.14 0.24
 -6 7 1 0.09 0.25
 6 7 -1 0.22 0.39
 -6 7 1 0.02 0.2
 -6 7 0 -0.21 0.36
 6 7 0 0.21 0.3
 -6 7 0 -0.2 0.27
 -6 -7 0 0.11 0.22
 -6 7 -1 5.55 0.71
 -6 7 -1 7.05 1.03
 6 7 1 7.73 0.9
 -6 -7 -1 7.47 1.03
 -6 7 -2 6.3 1.01
 -6 7 -2 7.09 0.84
 6 7 2 8.11 0.92
 -6 -7 -2 8.32 1.14
 6 7 3 0.32 0.26
 -6 -7 -3 0.23 0.31
 6 -7 3 0.17 0.32
 -6 7 -4 0.3 0.1
 6 7 4 0.13 0.22
 -6 7 -5 9.93 0.52
 6 7 5 9.93 0.93
 6 7 6 2.9 0.68
 -6 7 -6 3.96 0.33
 -6 -7 -6 3.4 0.39
 -6 7 -7 0.54 0.15
 -6 -7 -7 1.05 0.24
 -6 -7 -7 0.63 0.8
 -6 7 -8 4.06 0.34
 -6 -7 -8 4.5 0.37
 -6 -7 -8 2.15 1.11
 -6 7 -9 0.22 0.1
 -6 -7 -9 0.21 0.18
 -6 -7 -9 0.04 0.21
 -6 -7 -9 -0.42 0.38
 6 8 -9 0.43 0.12
 6 -8 -9 0.18 0.11
 6 8 -8 0.47 0.13
 6 -8 -8 0.68 0.18
 -6 8 7 1.97 0.47
 6 8 -7 1.88 0.24
 6 -8 -7 2.25 0.32
 6 8 -6 0 0.11
 -6 8 6 0.27 0.34
 -6 8 5 4.3 0.79
 -6 8 5 4.53 0.37
 6 8 -5 3.67 0.32
 -6 8 4 0.36 0.12
 6 8 -4 0.23 0.09
 -6 8 4 0.14 0.34
 6 8 -3 -0.13 0.89
 -6 8 3 -0.08 0.28
 -6 8 3 0.43 0.18
 6 8 -3 0.24 0.18
 -6 8 3 0.16 0.1
 -6 8 2 17.78 1.78
 -6 8 2 17.74 1.33
 6 8 -2 18.13 1.75
 6 8 -2 16.69 0.83
 -6 8 2 17.32 0.78
 6 8 -2 16.69 0.84
 -6 8 2 18.85 1.43
 -6 8 2 17.2 1.15
 -6 8 1 1.02 0.44
 -6 8 1 1.14 0.64
 6 8 -1 1.54 0.66
 -6 8 1 1.35 0.48
 -6 8 1 1.57 0.35
 6 8 0 3.38 0.64
 -6 8 0 5.95 0.74
 -6 8 0 3.46 0.51
 -6 8 0 3.74 0.85
 -6 8 -1 0.08 0.31
 -6 8 -1 0.15 0.22
 6 8 1 0.04 0.33
 -6 8 -1 0 0.19
 6 8 1 0.18 0.11
 -6 -8 -1 0.26 0.44
 6 8 2 0.74 0.16
 -6 8 -2 0.57 0.38
 6 8 2 1.04 0.39
 6 8 2 1.51 0.36
 -6 -8 -2 0.83 0.53
 6 8 3 4.42 0.36
 -6 8 -3 4.09 0.25
 6 8 3 3.91 0.51
 -6 8 -4 3.9 0.27
 6 8 4 3.89 0.35
 6 8 4 3.78 0.59
 -6 8 -5 2.06 0.21
 6 8 5 2.16 0.65
 -6 8 -6 0.04 0.1
 6 8 6 0.06 0.54
 -6 -8 -6 0.09 0.2
 -6 8 -7 0.49 0.13
 -6 -8 -7 0.9 0.59
 -6 -8 -7 0.7 0.19
 -6 8 -8 -0.15 0.07
 -6 -8 -8 0.1 0.16
 -6 -8 -8 -0.63 0.94
 -6 8 -9 0.46 0.11
 -6 -8 -9 0.61 0.3
 6 9 -8 0.65 0.13
 6 -9 -8 1.1 0.19
 6 9 -7 0.18 0.1
 -6 9 7 -0.11 0.32
 6 -9 -7 0.27 0.18
 6 9 -6 5.66 0.37
 -6 9 6 4.05 0.74
 -6 9 6 4.83 0.4
 -6 9 5 0.02 0.1
 6 9 -5 -0.15 0.08
 -6 9 5 -0.05 0.24
 -6 9 4 0.36 0.21
 6 9 -4 0.04 0.1
 -6 9 4 0.27 0.38
 -6 9 4 0.12 0.1
 -6 9 3 0.13 0.24
 6 9 -3 0.13 0.18
 -6 9 3 0.06 0.36
 6 9 -3 -0.21 0.96
 -6 9 3 0.05 0.09
 -6 9 2 2.36 0.23
 -6 9 2 2.56 0.58
 -6 9 2 2.54 0.45
 6 9 -2 3.06 1.12
 6 9 -2 1.94 0.29
 6 9 -1 -0.23 0.2
 -6 9 1 0.08 0.09
 -6 9 1 -0.13 0.36
 -6 9 1 0.07 0.23
 6 9 -1 -0.15 0.79
 -6 9 0 5.52 0.61
 -6 9 0 4.99 0.3
 6 9 0 5.02 0.36
 6 9 0 6.23 0.86
 -6 9 -1 0.16 0.27
 6 9 1 -0.17 0.09
 6 9 1 -0.01 0.24
 6 9 2 5.39 0.64
 6 9 2 4.96 0.82
 6 9 2 5.84 0.38
 6 9 3 22.09 1.03
 6 9 3 21.92 1.46
 -6 9 -3 22.68 0.94
 -6 9 -4 0.72 0.13
 6 9 4 0.93 0.17
 6 9 4 1.16 0.55
 -6 9 -5 0.93 0.15
 6 9 5 1.41 0.52
 -6 9 -6 0.76 0.15
 -6 -9 -6 0.63 0.36
 -6 -9 -6 1.05 0.26
 -6 9 -7 0.02 0.07
 -6 -9 -7 0.39 0.17
 -6 -9 -7 -0.5 0.82
 -6 9 -8 1.67 0.17
 -6 -9 -8 1.15 0.79
 -6 -9 -8 1.53 0.23
 6 10 -8 1.65 0.17
 6 -10 -8 1.56 0.18
 6 10 -7 -0.04 0.07
 -6 10 7 0.23 0.23
 6 -10 -7 -0.13 0.13
 -6 10 6 0.28 0.33
 -6 10 6 0.45 0.14
 6 10 -6 0.31 0.12
 -6 10 5 1.45 0.2
 6 10 -5 1.37 0.19
 -6 10 5 1.03 0.31
 -6 10 5 1.08 0.46
 -6 10 4 0.1 0.22
 6 10 -4 0.35 0.1
 -6 10 4 0.68 0.15
 -6 10 4 0.82 0.45
 -6 10 3 1.64 0.39
 -6 10 3 1.77 0.2
 6 10 -3 1.73 0.25
 -6 10 3 1.12 0.48
 6 10 -2 1.71 0.32
 -6 10 2 2.11 0.21
 -6 10 2 2.56 0.65
 -6 10 2 1.96 0.37
 6 10 -2 2.2 1.13
 6 10 -1 2.25 0.35
 -6 10 1 2.54 0.23
 -6 10 1 1.78 0.63
 -6 10 1 1.81 0.36
 6 10 -1 2.35 0.87
 6 10 -1 2.47 0.36
 6 10 0 1.07 0.23
 -6 10 0 1 0.14
 -6 10 0 1.11 0.29
 6 10 0 0.2 0.55
 -6 10 -1 1.13 0.33
 6 10 1 0.98 0.41
 6 10 1 1.44 0.2
 6 10 2 13.51 0.71
 6 10 2 13.64 1.12
 6 10 2 15.58 1.51
 -6 10 -3 6.02 0.32
 6 10 3 6.88 0.97
 6 10 3 6.03 0.78
 6 10 3 4.86 0.41
 6 10 4 5.33 0.42
 6 10 4 4.77 0.81
 -6 10 -4 5.37 0.31
 -6 10 -5 0.37 0.11
 6 10 5 0.08 0.67
 6 10 5 0.46 0.17
 -6 10 -6 0.18 0.09
 -6 -10 -6 -0.19 0.41
 -6 -10 -6 0.6 0.2
 -6 10 -7 0.09 0.07
 -6 -10 -7 -0.33 0.56
 -6 -10 -7 0.31 0.14
 6 11 -7 0.21 0.09
 -6 11 7 0.22 0.09
 6 -11 -7 0.11 0.16
 -6 11 6 0.31 0.15
 -6 11 6 0.49 0.33
 6 11 -6 0.37 0.1
 -6 11 6 0.26 0.11
 6 11 -5 0.12 0.1
 -6 11 5 0.02 0.18
 -6 11 5 0.02 0.33
 -6 11 5 0.24 0.13
 6 11 -4 1.96 0.2
 -6 11 4 1.89 0.22
 -6 11 4 1.79 0.52
 -6 11 4 1.79 0.36
 6 11 -3 -0.01 0.1
 -6 11 3 0.07 0.27
 -6 11 3 0.23 0.24
 -6 11 3 0.1 0.08
 -6 11 2 5.85 0.65
 -6 11 2 4.85 0.79
 6 11 -2 4.72 1.03
 -6 11 2 5.98 0.36
 6 11 -2 5.73 0.45
 6 11 -1 0.56 0.26
 6 11 -1 0.06 1.03
 -6 11 1 0.49 0.29
 -6 11 1 0.94 0.14
 6 11 0 1.57 0.35
 -6 11 0 1.43 0.16
 -6 11 0 1.19 0.29
 6 11 0 1.69 1.03
 6 11 1 1.1 0.63
 -6 11 -1 0.77 0.25
 6 11 1 1.16 0.25
 6 11 2 2.46 0.29
 6 11 2 1.91 0.61
 -6 11 -3 0.44 0.1
 6 11 3 -0.31 0.34
 6 11 3 0.68 0.47
 6 11 3 0.29 0.14
 6 11 4 0.72 0.68
 6 11 4 1.05 0.24
 -6 11 -4 1.29 0.13
 6 11 4 2.06 0.54
 6 11 5 -0.03 0.19
 6 11 5 0.06 0.42
 -6 11 -5 0.48 0.1
 -6 -11 -5 0.37 0.27
 -6 11 -6 0.55 0.1
 6 11 6 0.4 0.24
 -6 -11 -6 0.25 0.16
 -6 -11 -6 0.63 0.61
 -6 11 -7 -0.02 0.05
 -6 -11 -7 -0.85 0.59
 -6 -11 -7 0.09 0.15
 -6 12 6 0.22 0.1
 -6 12 6 0.23 0.14
 6 12 -6 0.31 0.08
 6 12 -5 1.29 0.15
 -6 12 5 1.17 0.16
 -6 12 5 0.99 0.21
 -6 12 4 0.55 0.39
 -6 12 4 0.85 0.26
 6 12 -4 0.98 0.13
 -6 12 4 0.54 0.13
 -6 12 3 1.52 0.47
 -6 12 3 1.58 0.18
 -6 12 3 1.03 0.29
 6 12 -3 1.5 0.16
 6 12 -2 3.58 0.31
 -6 12 2 3.44 0.67
 -6 12 2 3.64 0.48
 -6 12 2 3.67 0.26
 -6 12 1 0.81 0.28
 6 12 -1 -0.01 0.25
 -6 12 1 0.48 0.1
 6 12 -1 -0.66 0.93
 6 12 0 -0.22 0.28
 -6 12 0 0.01 0.07
 6 12 0 0.49 0.3
 6 12 0 0.95 1
 -6 12 0 -0.03 0.2
 6 12 1 -0.76 0.61
 6 12 1 0.44 0.31
 6 12 2 0.27 0.72
 6 12 2 0.82 0.3
 6 12 3 0.53 0.24
 6 12 3 0.49 0.48
 6 12 4 0.7 0.24
 6 12 4 0.92 0.64
 6 12 5 0.51 0.24
 -6 -12 -5 0.4 0.44
 -6 -12 -6 0.21 0.56
 -6 -12 -6 0.18 0.16
 -6 13 4 1.22 0.13
 6 13 -4 0.77 0.1
 -6 13 4 0.94 0.22
 -6 13 3 0.37 0.19
 -6 13 3 0.31 0.09
 6 13 -3 0.38 0.09
 -6 13 2 0.27 0.2
 6 13 -2 0.37 0.09
 -6 13 2 0.57 0.1
 6 13 -1 0.79 0.21
 -6 13 1 0.75 0.23
 -6 13 1 0.77 0.1
 6 13 0 0.13 0.9
 6 13 0 0.19 0.24
 6 13 1 0.26 0.26
 6 13 1 0.85 0.9
 6 13 2 0.19 0.83
 6 13 2 0.44 0.22
 6 13 2 0.46 0.22
 6 13 3 0.14 0.2
 6 13 3 -0.02 0.25
 6 13 4 0.18 0.2
 6 13 4 -0.08 0.24
 6 14 -1 0.34 0.06
 6 14 0 0.1 0.12
 6 14 1 0.36 0.18
 6 14 2 0.05 0.19
 -7 0 11 -0.07 0.08
 -7 0 10 10.77 0.61
 -7 0 10 11.47 0.7
 -7 0 9 0.06 0.12
 7 0 -9 0.01 0.09
 -7 0 9 0.08 0.17
 7 0 -8 20.01 1.07
 -7 0 8 18.94 0.98
 7 0 -7 0.15 0.11
 -7 0 7 0.07 0.16
 -7 0 6 4.24 0.65
 -7 0 5 -0.02 0.23
 7 0 -4 1.18 0.79
 -7 0 4 0.87 0.26
 7 0 -4 0.4 0.65
 7 0 -3 0.08 0.44
 7 0 -3 0.46 0.55
 -7 0 3 -0.12 0.14
 -7 0 3 -0.07 0.11
 7 0 -2 13.57 1.16
 7 0 -2 13.88 1.23
 7 0 -1 0.17 0.24
 7 0 -1 0.23 0.39
 -7 0 1 0.15 0.19
 -7 0 1 0.02 0.08
 7 0 0 17.44 1.2
 -7 0 0 16.39 1.28
 -7 0 0 16.39 0.92
 7 0 0 16.74 1.13
 7 0 1 0.01 0.15
 -7 0 -1 -0.02 0.24
 -7 0 -1 0.05 0.08
 7 0 1 -0.01 0.12
 -7 0 -2 2.95 0.32
 -7 0 -2 2.08 0.47
 7 0 2 2.06 0.34
 7 0 2 2.34 0.37
 7 0 3 0.1 0.15
 -7 0 -3 0.15 0.3
 7 0 3 0.13 0.15
 -7 0 -4 1.63 0.67
 7 0 4 0.97 0.3
 7 0 4 1.88 0.35
 7 0 5 -0.06 0.22
 -7 0 -5 0.43 0.54
 -7 0 -6 0.3 0.13
 -7 0 -7 0.01 0.11
 7 0 7 0.21 0.18
 7 0 7 0.25 0.17
 7 0 8 0.94 0.23
 7 0 8 1.04 0.21
 -7 0 -8 0.97 0.18
 7 0 9 -0.02 0.18
 7 0 9 -0.07 0.11
 7 0 10 9 0.57
 7 0 10 9.12 0.47
 7 0 10 9.82 0.64
 7 0 11 -0.02 0.1
 -7 1 11 2.48 0.2
 -7 -1 11 2.22 0.24
 -7 1 10 1.4 0.15
 -7 1 10 2.04 0.27
 -7 -1 10 2.28 0.25
 -7 -1 10 2.22 0.2
 -7 -1 10 2.48 0.32
 -7 1 9 0.91 0.2
 7 1 -9 0.78 0.12
 -7 1 9 1.07 0.23
 -7 -1 9 0.63 0.16
 7 -1 -9 0.59 0.18
 -7 1 8 27.46 1.49
 -7 1 8 28.05 1.29
 7 1 -8 28.8 1.39
 -7 -1 8 26.85 1.35
 7 -1 -8 28.58 1.47
 -7 1 7 7.09 0.47
 7 1 -7 6.64 0.49
 7 -1 -7 5.97 0.43
 -7 -1 7 6.3 0.49
 7 -1 -7 6.56 0.53
 -7 1 6 5.1 0.68
 -7 -1 6 5.26 0.67
 -7 1 5 2.89 0.48
 -7 -1 5 3.04 0.47
 -7 1 4 18.92 1.31
 7 1 -4 17.12 1.37
 -7 1 4 17.69 1.16
 -7 -1 4 19.27 1.16
 -7 1 3 0.29 0.17
 7 1 -3 -0.02 0.23
 -7 1 3 -0.04 0.19
 -7 -1 3 0.23 0.13
 7 -1 -3 -0.52 0.37
 7 -1 -3 -0.2 0.34
 7 1 -2 15.78 1.17
 7 1 -2 16.83 1.07
 -7 1 2 16.29 1.26
 -7 1 2 15.89 1
 -7 -1 2 15.52 1.19
 -7 -1 2 17 0.95
 7 1 -1 26.91 1.64
 -7 1 1 26.05 1.84
 7 1 -1 25.82 1.63
 -7 1 1 27.73 1.4
 -7 -1 1 27.33 1.83
 -7 -1 1 25.68 1.33
 -7 1 0 1.39 0.35
 7 1 0 0.96 0.25
 7 1 0 1.3 0.23
 -7 1 0 1.52 0.24
 -7 -1 0 0.85 0.35
 7 -1 0 0.45 0.24
 -7 -1 0 1.06 0.17
 7 -1 0 0.58 0.31
 -7 1 -1 45.19 3.01
 7 1 1 48.94 2.8
 7 1 1 45.69 2.6
 -7 1 -1 46.93 2.25
 7 -1 1 50.36 2.6
 7 -1 1 46.69 2.9
 -7 -1 -1 46.64 2.15
 -7 1 -2 -0.03 0.08
 7 1 2 0.1 0.13
 7 1 2 0.19 0.14
 -7 1 -2 0.05 0.22
 7 1 2 -0.08 0.1
 -7 -1 -2 0.16 0.23
 7 -1 2 0.12 0.16
 7 -1 2 0.14 0.13
 7 1 3 1.26 0.3
 -7 1 -3 1.42 0.37
 7 1 3 1.1 0.29
 -7 -1 -3 0.64 0.47
 7 -1 3 1.18 0.29
 7 -1 3 1.25 0.26
 7 1 4 2.77 0.44
 -7 1 -4 3.53 0.61
 -7 -1 -4 1.45 0.66
 7 -1 4 3.13 0.43
 7 -1 4 2.96 0.48
 7 1 5 1.15 0.35
 7 -1 5 1.06 0.31
 -7 -1 -5 1.59 1.11
 -7 1 -6 11.55 0.67
 -7 -1 -6 11.56 1.06
 -7 -1 -6 12.33 0.75
 7 1 7 0 0.14
 -7 1 -7 0.07 0.11
 7 1 7 0.27 0.2
 -7 -1 -7 0.14 0.15
 7 -1 7 0.04 0.21
 7 1 8 0.94 0.23
 7 1 8 1.28 0.21
 -7 -1 -8 0.87 0.2
 7 -1 8 0.34 0.26
 7 -1 8 0.78 0.22
 7 1 9 0.77 0.23
 7 1 9 1.11 0.18
 7 1 9 0.98 0.2
 -7 -1 -9 1.28 0.18
 7 -1 9 1.35 0.25
 7 -1 9 1.07 0.2
 7 1 10 1.43 0.18
 7 1 10 1.45 0.24
 7 -1 10 1.22 0.17
 7 -1 10 1.72 0.23
 7 1 11 0.24 0.09
 7 -1 11 0.16 0.08
 -7 -2 11 0.65 0.15
 -7 2 10 6.33 0.42
 -7 -2 10 6.66 0.4
 -7 -2 10 6.27 0.45
 7 -2 -10 5.76 0.41
 -7 2 9 2.21 0.21
 -7 2 9 2.01 0.29
 7 -2 -9 2.68 0.32
 -7 -2 9 2.01 0.27
 -7 2 8 0.07 0.13
 -7 2 8 -0.04 0.14
 7 2 -8 -0.02 0.08
 7 -2 -8 -0.03 0.13
 -7 -2 8 -0.01 0.17
 7 -2 -8 -0.21 0.16
 -7 2 7 8.17 0.58
 7 2 -7 8.21 0.51
 -7 2 7 7.4 0.45
 -7 -2 7 6.95 0.56
 7 -2 -7 7.81 0.51
 -7 -2 7 7.88 0.54
 7 -2 -7 8.74 0.71
 7 2 -6 17.3 0.92
 -7 2 6 16.6 1.28
 -7 -2 6 18.74 1.28
 -7 2 5 0.98 0.36
 7 -2 -5 0.06 0.75
 -7 -2 5 1.26 0.32
 -7 2 4 1.56 0.4
 7 2 -4 1.09 0.33
 -7 2 4 1.25 0.3
 -7 2 4 1.53 0.42
 7 -2 -4 0.33 0.35
 -7 -2 4 1.29 0.31
 7 -2 -4 0.2 0.41
 -7 2 3 4.38 0.62
 -7 2 3 3.88 0.51
 7 2 -3 4.26 0.57
 -7 -2 3 4.52 0.46
 7 2 -2 31.3 1.95
 -7 2 2 33.38 2.2
 -7 2 2 31.47 1.69
 -7 -2 2 31.47 2.08
 -7 -2 2 32.9 1.61
 7 2 -1 5.67 0.64
 -7 2 1 7.35 0.74
 -7 2 1 5.69 0.55
 -7 -2 1 6.45 0.73
 -7 -2 1 5.62 0.43
 7 2 0 72.83 4.12
 -7 2 0 77.08 4.54
 -7 2 0 77.18 3.44
 7 2 0 70.4 3.93
 -7 2 -1 29.12 1.56
 7 2 1 30.82 1.78
 -7 2 -1 29.47 2.07
 7 2 1 29.4 1.8
 -7 2 -2 3.42 0.57
 -7 2 -2 3.11 0.39
 7 2 2 3.13 0.36
 7 2 2 3.3 0.45
 -7 -2 -2 1.53 0.44
 7 -2 2 3.37 0.4
 7 -2 2 3.75 0.51
 7 2 3 11.75 0.92
 -7 2 -3 12.78 0.86
 7 2 3 11.75 0.87
 -7 2 -3 11.5 1.07
 7 -2 3 11.23 0.94
 -7 2 -4 11.97 1.13
 7 -2 4 10.2 0.93
 7 -2 4 10.97 0.87
 7 -2 5 8.97 0.86
 -7 -2 -5 5.4 1.35
 -7 2 -6 4.05 0.28
 7 2 6 4.25 0.44
 -7 -2 -6 3.89 0.72
 -7 -2 -6 4.29 0.45
 7 -2 6 4.11 0.65
 7 2 7 0.03 0.16
 7 2 7 0.15 0.13
 7 2 7 0.24 0.16
 -7 -2 -7 0.24 0.14
 -7 -2 -7 0.24 0.27
 -7 -2 -7 -0.33 0.59
 7 2 8 2.43 0.31
 7 2 8 1.85 0.31
 7 2 8 2.39 0.26
 -7 -2 -8 2.42 0.32
 7 -2 8 2.3 0.34
 7 2 9 0.04 0.11
 7 2 9 0.28 0.18
 7 -2 9 0.11 0.15
 7 -2 9 0.1 0.2
 -7 -2 -9 -0.14 0.12
 7 2 10 6.69 0.45
 7 -2 10 5.56 0.39
 7 -2 10 5.99 0.44
 -7 -3 11 0.13 0.09
 -7 3 10 0.84 0.11
 7 -3 -10 0.88 0.17
 -7 -3 10 1.45 0.2
 -7 3 9 4.12 0.34
 7 -3 -9 3.64 0.42
 -7 -3 9 4.04 0.38
 -7 3 8 1.52 0.24
 -7 -3 8 1.54 0.28
 7 -3 -8 1.25 0.27
 7 -3 -8 1.22 0.22
 -7 3 7 0.47 0.14
 -7 3 7 0.25 0.16
 7 -3 -7 0.43 0.19
 -7 3 6 16.08 0.88
 7 3 -6 14.6 0.77
 -7 -3 6 16.38 1.19
 -7 3 5 1.33 0.36
 -7 -3 5 2.49 0.46
 -7 3 4 0.01 0.18
 -7 3 4 -0.13 0.26
 -7 3 4 0.37 0.25
 7 3 -4 -0.14 0.2
 7 -3 -4 -0.12 0.22
 -7 -3 4 0.36 0.24
 -7 -3 4 -0.02 0.14
 7 3 -3 4.78 0.61
 -7 3 3 4.4 0.67
 -7 3 3 4.05 0.53
 -7 3 3 4.94 0.62
 7 -3 -3 3.4 0.57
 -7 -3 3 4.01 0.53
 -7 -3 3 4.68 0.47
 7 -3 -3 3.25 0.54
 7 3 -2 8.4 0.81
 -7 3 2 9.21 0.73
 -7 3 2 11.12 0.99
 7 -3 -2 8.2 0.89
 -7 -3 2 10.16 0.64
 -7 -3 2 10.52 0.88
 7 -3 -2 10.59 0.91
 -7 3 1 11.91 1
 7 3 -1 11.53 0.89
 -7 3 1 11.6 0.77
 -7 -3 1 7.21 0.9
 7 -3 -1 8.84 0.8
 7 -3 -1 8.41 0.81
 7 3 0 3.93 0.49
 7 -3 0 0.9 0.28
 -7 -3 0 2.08 0.44
 7 -3 0 1.13 0.28
 -7 3 -1 0.31 0.17
 7 3 1 0.64 0.23
 -7 3 -1 0.2 0.25
 7 -3 1 0.18 0.14
 7 -3 1 -0.08 0.11
 -7 -3 -1 0.18 0.18
 -7 3 -2 3.91 0.6
 -7 3 -2 3.34 0.44
 7 3 2 3.72 0.53
 -7 -3 -2 3.35 0.6
 7 -3 2 2.13 0.43
 7 3 3 4.87 0.65
 -7 3 -3 5.19 0.73
 -7 3 -3 5.6 0.6
 7 -3 3 5.78 0.63
 -7 -3 -3 3.44 0.71
 -7 3 -4 8.04 1
 7 -3 4 9.04 0.84
 7 -3 4 8.02 0.78
 -7 -3 -4 6.2 1.07
 -7 -3 -5 2.67 0.97
 7 -3 5 3.24 0.51
 7 3 6 3.98 0.41
 7 3 6 3.46 0.31
 -7 -3 -6 3.96 0.36
 -7 -3 -6 2.43 1.68
 -7 -3 -6 4.4 0.91
 7 3 7 1.26 0.18
 7 3 7 1.73 0.24
 7 3 7 1.44 0.29
 -7 -3 -7 1.73 0.7
 -7 -3 -7 1.19 0.27
 -7 -3 -7 1.32 0.28
 7 3 8 9.34 0.59
 7 3 8 10.28 0.68
 7 -3 8 9.05 0.66
 -7 -3 -8 9.38 0.67
 -7 -3 -8 9.82 0.85
 7 3 9 2.9 0.34
 -7 -3 -9 3.25 0.34
 7 -3 9 2.02 0.29
 7 3 10 0.07 0.1
 7 -3 10 -0.03 0.13
 -7 -3 -10 -0.01 0.08
 7 -3 10 -0.03 0.12
 -7 -4 10 -0.13 0.09
 7 -4 -10 0 0.1
 -7 4 9 0.12 0.07
 -7 -4 9 -0.09 0.14
 7 -4 -9 0.07 0.16
 7 -4 -9 0.3 0.11
 -7 4 8 0.37 0.13
 7 -4 -8 0.42 0.17
 -7 -4 8 0.16 0.21
 -7 4 7 0.34 0.14
 7 -4 -7 0.38 0.2
 -7 4 6 2.58 0.29
 7 -4 -6 2.49 0.31
 -7 4 5 4.31 0.67
 -7 4 5 4.01 0.69
 -7 -4 5 3.87 0.55
 -7 4 4 0.52 0.33
 -7 4 4 0.58 0.37
 -7 4 4 0.63 0.26
 7 -4 -4 0.84 0.41
 -7 -4 4 0.42 0.27
 -7 4 3 0.21 0.19
 -7 4 3 0.44 0.32
 -7 4 3 0.27 0.29
 7 4 -3 0.57 0.34
 -7 -4 3 0.36 0.22
 7 4 -2 0.71 0.34
 -7 4 2 0.39 0.19
 -7 4 2 0.47 0.27
 7 -4 -2 0.78 0.31
 7 4 -1 4.44 0.58
 -7 4 1 3.27 0.44
 -7 4 1 4.07 0.63
 -7 -4 1 1.86 0.44
 7 -4 -1 3.86 0.56
 -7 4 0 2.18 0.46
 7 4 0 1.08 0.3
 -7 4 0 1.73 0.34
 7 -4 0 1.45 0.36
 -7 -4 0 1.4 0.43
 7 4 1 -0.18 0.14
 -7 4 -1 -0.17 0.11
 -7 4 -1 0.48 0.32
 -7 -4 -1 0.12 0.19
 7 -4 1 0.02 0.14
 -7 4 -2 2.83 0.43
 -7 4 -2 3.32 0.62
 7 4 2 2.41 0.46
 -7 -4 -2 3.12 0.58
 -7 4 -3 9.02 1
 7 4 3 12.55 1.06
 -7 4 -3 8.77 0.87
 -7 -4 -3 12.62 1.24
 7 -4 4 0.31 0.22
 -7 -4 -4 0.31 0.35
 7 4 5 0.9 0.23
 -7 -4 -5 0.15 0.64
 7 -4 5 1.2 0.41
 -7 -4 -5 1.16 0.37
 7 4 6 0.42 0.16
 -7 4 -6 0.42 0.15
 7 4 6 0.68 0.2
 -7 -4 -6 0.58 0.19
 -7 -4 -6 0.54 0.5
 7 4 7 -0.04 0.09
 7 4 7 -0.21 0.13
 -7 -4 -7 0.22 0.15
 -7 -4 -7 0.89 1.06
 7 4 8 -0.04 0.12
 -7 -4 -8 0.17 0.27
 -7 -4 -8 -0.26 0.74
 -7 -4 -8 0.08 0.14
 7 4 9 2.21 0.24
 7 -4 9 2.18 0.31
 -7 -4 -9 2.28 0.31
 7 -4 10 0.06 0.1
 -7 -4 -10 0.07 0.1
 7 -4 10 0.05 0.14
 7 -5 -10 0.19 0.12
 -7 -5 10 0.14 0.11
 -7 -5 9 3.39 0.35
 7 -5 -9 3.37 0.4
 7 -5 -9 3.37 0.28
 7 -5 -8 6.97 0.49
 -7 5 7 9.44 0.48
 7 -5 -7 9.09 0.62
 -7 5 6 0.7 0.12
 7 -5 -6 0.96 0.25
 -7 5 5 0.31 0.26
 -7 5 5 0.29 0.26
 -7 5 5 0.27 0.08
 -7 5 4 0.04 0.19
 -7 5 4 0.41 0.41
 -7 5 4 -0.02 0.19
 -7 -5 4 -0.08 0.35
 -7 5 3 0.04 0.2
 -7 5 3 0.02 0.22
 -7 5 3 0.03 0.25
 -7 -5 3 0.15 0.24
 -7 5 2 11.35 1.18
 -7 5 2 11.68 0.9
 7 5 -2 10.21 1.12
 -7 5 2 11.2 0.97
 -7 5 1 27.44 1.57
 7 5 -1 24.51 1.7
 -7 5 1 27.18 2.05
 7 -5 -1 26.36 1.77
 -7 5 0 13.32 0.99
 7 5 0 14.18 1.11
 -7 5 0 12.75 1.29
 -7 -5 0 14.5 1.27
 7 -5 0 14.55 1.13
 -7 5 -1 18.99 1.23
 7 5 1 18.24 1.27
 -7 5 -1 17.77 1.54
 -7 -5 -1 18.53 1.55
 -7 5 -2 4.49 0.58
 -7 5 -2 5.57 0.82
 -7 -5 -2 4.91 0.78
 -7 5 -3 0.86 0.36
 -7 5 -3 0.89 0.4
 -7 -5 -3 0.73 0.37
 7 -5 4 1.07 0.4
 -7 -5 -4 1.04 0.44
 -7 5 -5 5.64 0.38
 7 5 5 5.99 0.47
 -7 -5 -5 7.6 0.66
 -7 5 -6 2.47 0.26
 7 5 6 1.9 0.26
 -7 -5 -6 1.6 0.26
 -7 -5 -6 2.14 0.65
 -7 5 -7 0.67 0.17
 7 5 7 0.44 0.17
 -7 -5 -7 0.17 1.08
 -7 -5 -7 0.53 0.17
 7 5 8 9.55 0.55
 -7 5 -8 9.65 0.57
 -7 -5 -8 10.2 1.21
 -7 -5 -8 9.75 0.63
 -7 -5 -8 8.82 0.7
 -7 -5 -9 1.12 0.29
 7 -5 9 1.67 0.26
 -7 -5 -9 1.82 0.28
 7 -5 10 0.13 0.11
 -7 -5 -10 0.05 0.08
 7 -6 -10 0.37 0.13
 -7 -6 10 0.16 0.13
 7 -6 -9 0.06 0.09
 -7 -6 9 0.06 0.15
 7 -6 -8 5.62 0.43
 7 6 -7 -0.11 0.12
 7 -6 -7 0 0.18
 7 6 -6 15.48 0.79
 7 6 -5 3.8 0.33
 -7 6 5 3.27 0.67
 -7 6 4 2.95 0.58
 7 6 -4 2.22 0.21
 -7 6 4 1.55 0.61
 -7 6 4 1.39 0.41
 7 6 -3 1.71 0.56
 -7 6 3 1.61 0.51
 -7 6 3 1.18 0.44
 -7 6 3 1.34 0.36
 -7 6 2 -0.06 0.27
 7 6 -2 -0.25 0.6
 -7 6 2 -0.17 0.18
 -7 6 2 0.16 0.2
 7 6 -1 0.32 0.6
 -7 6 1 0.03 0.3
 -7 6 1 -0.1 0.21
 -7 6 1 0.08 0.23
 -7 6 0 1.47 0.39
 -7 6 0 2.73 0.64
 7 6 0 2.71 0.55
 -7 -6 0 2.84 0.57
 7 6 1 3.73 0.61
 -7 6 -1 3.75 0.56
 -7 6 -1 5.32 0.84
 -7 -6 -1 4.35 0.74
 -7 6 -2 15.75 1.23
 -7 6 -2 18.73 1.61
 -7 -6 -2 19.56 1.7
 -7 6 -3 0.83 0.33
 -7 -6 -3 0.98 0.52
 7 6 4 1.88 0.58
 7 6 4 1.36 0.16
 -7 6 -4 1.47 0.19
 7 -6 4 1.23 0.48
 -7 -6 -4 1.54 0.68
 7 6 5 12.9 0.65
 -7 6 -5 12.5 0.63
 7 6 5 13.3 1.07
 7 6 6 10.57 0.55
 -7 6 -6 9.93 0.56
 -7 -6 -6 9.4 1.04
 -7 -6 -6 11.49 0.68
 -7 6 -7 2.69 0.28
 -7 -6 -7 1.69 0.27
 -7 -6 -7 1.99 0.79
 -7 6 -8 1.04 0.18
 -7 -6 -8 0.96 0.28
 -7 -6 -8 1.31 1.01
 -7 6 -9 0.28 0.13
 -7 -6 -9 0.04 0.15
 -7 -6 -9 0.26 0.22
 -7 -7 9 2.69 0.3
 7 7 -8 0.21 0.14
 7 -7 -8 0.2 0.13
 -7 7 7 3.43 0.68
 7 7 -7 3.91 0.36
 7 -7 -7 3.94 0.42
 7 7 -6 3.63 0.34
 -7 7 6 3.55 0.69
 -7 7 5 0.43 0.34
 7 7 -5 1.39 0.2
 -7 7 4 0.05 0.21
 -7 7 4 0.07 0.08
 7 7 -4 0.25 0.11
 -7 7 3 1.2 0.48
 7 7 -3 0.66 0.2
 7 7 -3 1.04 0.59
 -7 7 3 1.28 0.45
 -7 7 3 0.73 0.34
 -7 7 3 1.11 0.17
 -7 7 2 3.62 0.65
 -7 7 2 4.3 0.86
 7 7 -2 4.49 0.86
 -7 7 2 3.97 0.65
 -7 7 1 3.79 0.61
 7 7 -1 2.33 0.68
 -7 7 1 3.96 0.63
 -7 7 1 2.72 0.73
 7 7 0 6.35 0.85
 -7 7 0 5.07 0.73
 -7 7 0 6.51 0.99
 -7 -7 0 6.5 0.97
 -7 7 -1 15.44 1.54
 -7 7 -1 14.69 1.16
 7 7 1 15.06 1.22
 -7 -7 -1 15.55 1.52
 -7 7 -2 9.73 1.02
 -7 7 -2 8.7 1.19
 -7 -7 -2 10.07 1.28
 7 7 3 0.76 0.46
 -7 7 -3 0.36 0.1
 7 7 4 3.27 0.57
 -7 7 -4 3.19 0.26
 7 7 5 -0.64 0.54
 -7 7 -5 0.12 0.09
 -7 7 -6 1.1 0.18
 -7 -7 -6 0.84 0.22
 -7 -7 -6 0.49 0.45
 -7 7 -7 3.65 0.33
 -7 -7 -7 4.07 0.38
 -7 -7 -7 5.04 1.14
 -7 7 -8 0.16 0.12
 -7 -7 -8 -0.44 0.9
 -7 -7 -8 0.07 0.23
 -7 7 -9 0.21 0.12
 -7 -7 -9 -0.1 0.19
 -7 -7 -9 0.22 0.15
 7 8 -9 0.48 0.12
 7 -8 -9 0.68 0.12
 -7 8 8 2.3 0.53
 7 8 -8 2.23 0.25
 7 -8 -8 2.95 0.29
 -7 8 7 10.24 1.13
 7 8 -7 9.36 0.54
 7 -8 -7 8.84 0.61
 7 8 -6 4.3 0.36
 -7 8 6 4.95 0.77
 7 8 -5 8.06 0.48
 -7 8 5 7.59 0.49
 -7 8 5 9.51 1.08
 -7 8 4 0.8 0.17
 -7 8 4 0.67 0.36
 7 8 -4 0.78 0.15
 -7 8 3 0.21 0.17
 -7 8 3 0.31 0.11
 7 8 -3 -0.16 0.85
 -7 8 3 0.36 0.37
 7 8 -3 0.48 0.23
 7 8 -2 1.8 1
 7 8 -2 1.25 0.26
 -7 8 2 1.03 0.39
 -7 8 2 1.43 0.19
 -7 8 2 1.21 0.31
 -7 8 1 1.15 0.36
 -7 8 1 0.75 0.41
 -7 8 1 1.04 0.14
 7 8 -1 1.08 0.31
 -7 8 1 1.21 0.4
 7 8 -1 1.47 0.92
 7 8 0 2.66 0.29
 -7 8 0 2.55 0.22
 7 8 0 3.76 0.75
 -7 8 0 2.09 0.71
 -7 8 0 2.66 0.45
 -7 8 0 3.23 0.64
 -7 8 -1 2.26 0.4
 -7 8 -1 2.66 0.22
 7 8 1 2.37 0.58
 -7 8 -1 1.3 0.65
 7 8 1 2.87 0.27
 -7 -8 -1 2.43 0.74
 -7 8 -2 0.69 0.31
 7 8 2 0.78 0.49
 7 8 2 0.84 0.18
 7 8 2 0.83 0.42
 -7 8 -2 0.83 0.13
 -7 8 -3 0.2 0.1
 7 8 3 -0.02 0.52
 7 8 3 0.17 0.14
 7 8 4 1.88 0.7
 -7 8 -4 1.95 0.2
 7 8 5 7.98 0.9
 -7 8 -5 9.11 0.49
 -7 8 -6 0.82 0.16
 -7 -8 -6 0.51 0.52
 -7 -8 -6 0.79 0.23
 -7 8 -7 -0.1 0.1
 -7 -8 -7 0.1 0.14
 -7 -8 -7 -0.47 0.68
 -7 8 -8 -0.08 0.09
 -7 -8 -8 0.21 0.24
 -7 -8 -8 1.09 0.79
 -7 8 -9 0.14 0.09
 7 9 -8 0.05 0.1
 7 -9 -8 0.13 0.1
 -7 9 7 0.12 0.33
 7 9 -7 0.13 0.11
 7 -9 -7 0.23 0.16
 -7 9 6 0.15 0.12
 -7 9 6 0.35 0.33
 7 9 -6 0.1 0.1
 -7 9 5 7.64 0.47
 7 9 -5 7.4 0.44
 -7 9 5 5.86 0.91
 -7 9 4 0.37 0.26
 7 9 -4 0.22 0.11
 -7 9 4 0.41 0.3
 -7 9 4 0.54 0.14
 -7 9 3 5.27 0.61
 7 9 -3 5.56 0.42
 -7 9 3 5.59 0.83
 7 9 -3 6.28 1.26
 -7 9 3 5.29 0.36
 -7 9 2 0.81 0.31
 7 9 -2 0.99 0.26
 7 9 -2 1.07 1.05
 -7 9 2 0.92 0.15
 -7 9 2 1.02 0.5
 7 9 -1 -0.01 0.23
 7 9 -1 -0.4 0.23
 -7 9 1 -0.01 0.09
 -7 9 1 0.06 0.23
 -7 9 1 -0.01 0.26
 7 9 -1 -0.26 0.7
 7 9 0 1 0.58
 -7 9 0 1.05 0.15
 7 9 0 0.95 0.3
 -7 9 0 0.95 0.29
 -7 9 -1 4.92 0.59
 -7 9 -1 3.99 0.26
 7 9 1 4.22 0.8
 7 9 1 4.04 0.35
 7 9 2 11.88 1.01
 7 9 2 10.58 0.61
 7 9 2 11.85 1.25
 -7 9 -2 11.06 0.92
 -7 9 -2 11.71 0.54
 7 9 3 0.59 0.17
 7 9 3 0.64 0.64
 -7 9 -3 0.36 0.11
 7 9 4 2.89 0.63
 7 9 4 2.93 0.31
 -7 9 -4 2.54 0.24
 7 9 5 -0.26 0.67
 -7 9 -5 0.1 0.08
 -7 -9 -5 0.31 0.27
 -7 9 -6 2.09 0.21
 -7 -9 -6 2.76 0.33
 -7 -9 -6 1.08 0.62
 -7 9 -7 1.19 0.15
 -7 -9 -7 0.99 0.21
 -7 -9 -7 0.61 0.93
 -7 9 -8 4.02 0.26
 -7 -9 -8 4.21 0.66
 -7 -9 -8 4 0.34
 7 10 -7 1.16 0.15
 7 -10 -7 1.46 0.22
 7 10 -6 0.78 0.14
 -7 10 6 0.56 0.37
 -7 10 6 0.41 0.14
 7 10 -5 9.13 0.51
 -7 10 5 10.12 0.54
 -7 10 5 8.22 0.74
 -7 10 5 9.69 1.1
 7 10 -4 0.48 0.12
 -7 10 4 0.04 0.21
 -7 10 4 0.25 0.1
 -7 10 4 0.17 0.4
 -7 10 3 0.2 0.1
 -7 10 3 -0.23 0.33
 7 10 -3 0.11 0.19
 -7 10 3 -0.06 0.21
 -7 10 2 4.99 0.85
 7 10 -2 5 1.29
 -7 10 2 4.51 0.59
 -7 10 2 4.68 0.33
 7 10 -2 4.73 0.4
 7 10 -1 1.72 1.11
 7 10 -1 1.68 0.36
 -7 10 1 1.94 0.2
 -7 10 1 1.27 0.31
 7 10 -1 1.28 0.29
 -7 10 0 1.36 0.16
 -7 10 0 1.42 0.32
 7 10 0 1.39 0.37
 7 10 0 1.6 1.03
 7 10 1 1.18 0.56
 -7 10 -1 1.51 0.36
 7 10 1 0.78 0.29
 -7 10 -1 1.03 0.14
 7 10 2 1.02 0.5
 -7 10 -2 0.3 0.1
 7 10 2 0.01 0.21
 7 10 3 4.5 0.84
 7 10 3 3.35 0.34
 7 10 3 3.86 0.76
 -7 10 -3 3.5 0.24
 7 10 4 1.06 0.23
 7 10 4 1.97 0.76
 -7 10 -4 0.97 0.14
 7 10 5 -0.4 0.26
 -7 10 -5 0.09 0.08
 -7 -10 -5 -0.59 0.24
 -7 10 -6 -0.08 0.07
 -7 -10 -6 0.03 0.14
 -7 -10 -6 0.57 0.49
 -7 10 -7 0.86 0.11
 -7 -10 -7 0.4 0.22
 -7 -10 -7 0.24 0.77
 7 11 -7 3.29 0.22
 7 -11 -7 3.19 0.28
 -7 11 6 0.36 0.18
 -7 11 6 0.2 0.1
 7 11 -6 0.23 0.08
 -7 11 5 0.12 0.23
 -7 11 5 0.14 0.18
 7 11 -5 -0.03 0.07
 -7 11 5 0.02 0.09
 -7 11 4 0.08 0.19
 -7 11 4 0.37 0.11
 7 11 -4 0.16 0.11
 -7 11 4 0.32 0.41
 -7 11 3 6.25 0.39
 -7 11 3 5.83 0.84
 7 11 -3 6.54 0.38
 -7 11 3 6.28 0.65
 -7 11 2 -0.2 0.36
 7 11 -2 0.37 0.27
 -7 11 2 0.26 0.11
 7 11 -2 -0.17 0.7
 -7 11 2 0.02 0.23
 -7 11 1 0.27 0.26
 7 11 -1 0.68 0.32
 7 11 -1 2.07 1.13
 -7 11 1 0.56 0.12
 7 11 0 1.03 0.3
 -7 11 0 0.66 0.29
 7 11 0 0.8 0.29
 7 11 0 0.52 1.07
 -7 11 0 0.79 0.13
 7 11 1 1.4 1.02
 -7 11 -1 0.97 0.32
 7 11 1 1.26 0.37
 -7 11 -1 1.11 0.14
 -7 11 -2 -0.03 0.07
 7 11 2 -0.41 0.71
 7 11 2 -0.46 0.29
 -7 11 -3 3.97 0.24
 7 11 3 4.45 0.42
 7 11 3 4.06 0.89
 7 11 4 -0.16 0.24
 -7 11 -4 0.16 0.07
 7 11 4 -0.69 0.58
 7 11 5 0.01 0.26
 -7 11 -5 0.07 0.07
 -7 -11 -5 -0.63 0.24
 -7 11 -6 0.04 0.07
 -7 -11 -6 0.13 0.67
 -7 -11 -6 -0.02 0.15
 -7 12 5 -0.14 0.07
 -7 12 5 -0.2 0.13
 7 12 -5 -0.01 0.07
 -7 12 4 1.35 0.38
 -7 12 4 1.71 0.19
 -7 12 4 1.84 0.33
 7 12 -4 1.74 0.18
 -7 12 3 0.08 0.09
 7 12 -3 0.19 0.09
 -7 12 3 -0.09 0.33
 -7 12 3 0.14 0.2
 -7 12 2 0.07 0.07
 -7 12 2 0.03 0.18
 7 12 -2 -0.01 0.14
 7 12 -1 0.18 0.22
 -7 12 1 0.1 0.16
 -7 12 1 0.1 0.08
 7 12 -1 -0.15 1
 7 12 0 -0.59 0.28
 -7 12 0 0.04 0.08
 7 12 0 -0.05 0.71
 -7 12 0 -0.03 0.21
 7 12 1 0.78 1
 7 12 1 -0.26 0.31
 7 12 1 0.79 0.27
 7 12 2 0.53 0.91
 7 12 2 0.36 0.27
 7 12 3 0.55 0.83
 7 12 3 0.53 0.28
 7 12 4 0.78 0.27
 7 12 5 0.77 0.24
 7 12 5 0.96 0.3
 -7 -12 -5 0.36 0.53
 -7 13 4 0.3 0.08
 7 13 -4 0.28 0.08
 -7 13 4 0.41 0.16
 -7 13 3 1.6 0.15
 -7 13 3 0.88 0.23
 7 13 -3 1.79 0.15
 7 13 -2 0 0.07
 -7 13 2 0.13 0.17
 -7 13 2 0.01 0.06
 -7 13 1 0.76 0.22
 -7 13 1 0.32 0.08
 7 13 -1 0.27 0.17
 7 13 0 1.12 0.27
 -7 13 0 0.89 0.25
 7 13 1 0.29 0.26
 7 13 2 0.3 0.27
 7 13 3 0.02 0.26
 7 13 4 0.51 0.25
 7 14 -1 -0.01 0.05
 7 14 0 -0.07 0.06
 -8 0 11 -0.01 0.08
 -8 0 10 2.73 0.31
 -8 0 10 2.85 0.24
 8 0 -9 -0.04 0.1
 -8 0 9 -0.07 0.09
 -8 0 9 -0.04 0.16
 -8 0 8 1.49 0.24
 8 0 -8 1.8 0.28
 8 0 -7 -0.11 0.14
 -8 0 7 0.13 0.16
 -8 0 6 0.05 0.26
 8 0 -6 0.4 0.17
 -8 0 5 -0.12 0.23
 -8 0 4 2.25 0.42
 -8 0 4 2.13 0.45
 -8 0 3 0.24 0.22
 -8 0 3 -0.02 0.12
 8 0 -3 0.64 0.65
 8 0 -3 0.37 0.48
 -8 0 2 119.1 4.99
 8 0 -2 98.18 6.35
 8 0 -2 109.67 5.83
 -8 0 2 115.5 6.5
 8 0 -1 0.01 0.22
 -8 0 1 0.21 0.16
 8 0 -1 0.52 0.36
 -8 0 1 0.09 0.15
 8 0 0 6.13 0.68
 -8 0 0 5.53 0.46
 8 0 0 6.67 0.64
 -8 0 0 6.63 0.78
 -8 0 -1 -0.12 0.16
 8 0 1 0.04 0.14
 8 0 1 0.03 0.17
 -8 0 -1 -0.01 0.11
 8 0 2 43.64 2.69
 -8 0 -2 47.72 3.01
 -8 0 -2 41.74 2.09
 8 0 2 42.3 2.43
 8 0 3 0.02 0.17
 -8 0 -3 -0.52 0.34
 8 0 3 -0.17 0.15
 -8 0 -4 2.5 0.71
 8 0 4 2.21 0.45
 -8 0 -5 -0.36 0.43
 -8 0 -6 19.09 1.26
 -8 0 -6 19.06 1.03
 8 0 7 0.06 0.21
 -8 0 -7 -0.03 0.14
 8 0 7 -0.04 0.16
 -8 0 -8 5.94 0.4
 8 0 8 5.37 0.42
 8 0 8 5.5 0.52
 8 0 9 -0.13 0.13
 8 0 9 -0.01 0.11
 8 0 10 0.03 0.09
 8 0 10 0.12 0.17
 -8 1 11 0.64 0.1
 -8 -1 11 0.62 0.14
 -8 1 10 3.38 0.31
 8 -1 -10 3.72 0.24
 -8 -1 10 3.02 0.3
 -8 -1 10 3.42 0.36
 -8 1 9 0.99 0.18
 8 1 -9 0.8 0.1
 -8 1 9 0.95 0.22
 -8 -1 9 1.45 0.3
 8 -1 -9 1.33 0.22
 -8 -1 9 1.46 0.2
 8 1 -8 0.27 0.14
 -8 1 8 0.39 0.13
 -8 1 8 0.09 0.18
 -8 -1 8 0.29 0.16
 8 -1 -8 0.04 0.13
 8 1 -7 1.79 0.27
 -8 1 7 1.73 0.23
 8 -1 -7 2.1 0.33
 -8 -1 7 1.55 0.27
 8 -1 -7 2.06 0.24
 8 1 -6 0.34 0.18
 -8 1 6 0.34 0.29
 -8 -1 6 0.07 0.23
 8 -1 -6 0 0.22
 -8 1 5 1.88 0.44
 -8 -1 5 1.78 0.37
 -8 1 4 2.57 0.41
 -8 1 4 1.88 0.49
 8 -1 -4 1.17 0.88
 -8 -1 4 2.01 0.39
 -8 1 3 10.81 0.81
 -8 1 3 10.8 0.97
 8 1 -3 10.52 1.04
 -8 -1 3 10.17 0.76
 8 1 -2 47.13 2.84
 -8 1 2 49.46 3.17
 -8 1 2 52.54 2.47
 -8 -1 2 49.25 2.39
 -8 -1 2 49.41 3.12
 8 1 -1 3.21 0.47
 -8 1 1 2.79 0.49
 -8 1 1 3.48 0.41
 8 1 -1 2.81 0.36
 8 -1 -1 0.76 0.38
 -8 -1 1 2.97 0.35
 -8 -1 1 3.28 0.53
 8 1 0 3.79 0.53
 -8 1 0 3.59 0.57
 8 1 0 4.29 0.44
 -8 1 0 3.89 0.42
 8 -1 0 2.12 0.54
 -8 -1 0 4.32 0.38
 -8 -1 0 4.67 0.67
 8 -1 0 3.59 0.59
 8 1 1 16.38 1.11
 -8 1 -1 15.62 0.94
 -8 1 -1 16.52 1.32
 8 1 1 15.21 1.11
 -8 -1 -1 14.45 0.84
 -8 -1 -1 15.32 1.35
 8 -1 1 16.39 1.1
 8 -1 1 15.56 1.21
 8 1 2 0.98 0.27
 -8 1 -2 1.06 0.24
 -8 1 -2 1.4 0.38
 8 1 2 1.48 0.3
 8 -1 2 1.14 0.29
 8 -1 2 1.29 0.27
 -8 -1 -2 1.18 0.53
 -8 1 -3 0.65 0.36
 8 1 3 0.76 0.27
 8 -1 3 0.56 0.23
 8 -1 3 0.53 0.23
 -8 -1 -3 0.7 0.61
 -8 1 -4 2.39 0.57
 8 1 4 1.67 0.39
 8 -1 4 2.06 0.37
 -8 -1 -4 2.88 0.85
 8 -1 4 2.7 0.48
 8 1 5 5.06 0.68
 8 -1 5 6.18 0.72
 -8 -1 -5 5.5 1.12
 8 1 6 0.49 0.18
 -8 1 -6 0.3 0.15
 -8 -1 -6 0.53 0.27
 -8 -1 -6 0.43 0.19
 8 1 7 3.89 0.42
 8 1 7 3.25 0.35
 -8 1 -7 3.62 0.29
 -8 -1 -7 3.6 0.5
 -8 -1 -7 3.03 0.36
 8 -1 7 3.87 0.41
 8 1 8 0.58 0.27
 8 1 8 0.35 0.18
 8 1 8 0.61 0.17
 8 -1 8 0.56 0.24
 8 -1 8 0.62 0.18
 -8 -1 -8 0.86 0.18
 8 1 9 0.38 0.13
 8 1 9 0.4 0.15
 8 1 9 0.68 0.22
 8 -1 9 0.67 0.21
 -8 -1 -9 0.25 0.09
 8 -1 9 0.74 0.16
 8 1 10 1.78 0.17
 8 1 10 1.63 0.24
 8 -1 10 1.8 0.23
 8 -1 10 1.79 0.19
 -8 2 10 1.81 0.19
 -8 -2 10 1.05 0.24
 -8 -2 10 1.23 0.15
 8 -2 -10 0.99 0.17
 -8 -2 10 1.35 0.2
 -8 2 9 1.98 0.28
 -8 -2 9 2.32 0.27
 8 -2 -9 2.77 0.32
 -8 2 8 0.54 0.19
 8 2 -8 0.27 0.09
 -8 2 8 0.33 0.15
 8 -2 -8 0.24 0.12
 8 -2 -8 0.64 0.18
 -8 -2 8 0.35 0.18
 8 2 -7 1.06 0.2
 -8 -2 7 1.54 0.25
 8 -2 -7 1.27 0.22
 -8 -2 7 0.98 0.23
 8 -2 -7 1.6 0.32
 8 2 -6 0.44 0.15
 -8 -2 6 0.41 0.35
 -8 2 5 -0.16 0.23
 -8 -2 5 0.13 0.18
 8 -2 -5 -0.14 1.02
 -8 2 4 1.7 0.41
 -8 2 4 2.49 0.42
 -8 -2 4 2.28 0.4
 8 -2 -4 0.33 0.64
 -8 2 3 8.96 0.91
 8 2 -3 8.91 0.92
 -8 2 3 8.72 0.79
 -8 2 3 8.53 0.88
 -8 -2 3 8.34 0.66
 -8 2 2 3.19 0.53
 -8 2 2 2.2 0.36
 8 2 -2 2.11 0.46
 -8 -2 2 2.62 0.46
 -8 -2 2 3.69 0.39
 -8 2 1 0.6 0.31
 -8 2 1 0.7 0.2
 8 2 -1 0.83 0.3
 8 -2 -1 0.08 0.23
 -8 -2 1 0.9 0.3
 8 -2 -1 0.21 0.19
 -8 2 0 54.92 2.61
 -8 2 0 55.32 3.45
 8 2 0 54.42 3.03
 -8 -2 0 49.34 3.45
 8 2 1 39.1 2.31
 -8 2 -1 41.71 2.7
 8 2 1 40.29 2.33
 -8 2 -1 43.05 2.04
 8 -2 1 34.42 2.26
 -8 2 -2 2.87 0.39
 -8 2 -2 2.9 0.55
 8 2 2 2.86 0.46
 -8 -2 -2 1.25 0.5
 8 -2 2 3.09 0.5
 -8 2 -3 20.32 1.28
 8 2 3 21.56 1.45
 -8 2 -3 23.72 1.78
 8 -2 3 21.6 1.54
 -8 2 -4 0.49 0.3
 8 -2 4 0.45 0.26
 8 -2 4 0.61 0.25
 -8 -2 -4 0.26 0.77
 -8 -2 -5 4.94 1.54
 8 -2 5 6.96 0.77
 8 2 6 0.27 0.18
 8 2 6 0.5 0.19
 -8 -2 -6 -0.09 0.67
 -8 -2 -6 0.28 0.26
 -8 -2 -6 0.26 0.19
 8 2 7 1.72 0.23
 8 2 7 2.45 0.34
 8 2 7 1.73 0.27
 8 -2 7 2.14 0.35
 -8 -2 -7 2.54 0.55
 -8 -2 -7 1.84 0.31
 8 2 8 0.14 0.14
 8 2 8 0.14 0.18
 8 2 8 0.11 0.13
 -8 -2 -8 0.1 0.15
 8 -2 8 0.18 0.19
 8 2 9 0.92 0.16
 8 2 9 0.77 0.21
 -8 -2 -9 0.64 0.15
 8 -2 9 0.41 0.16
 8 -2 9 0.82 0.2
 8 2 10 2.24 0.25
 8 -2 10 2.35 0.23
 8 -2 10 2.12 0.25
 -8 -3 10 -0.06 0.09
 8 -3 -10 -0.07 0.08
 -8 3 9 -0.16 0.09
 -8 -3 9 -0.03 0.15
 8 -3 -9 -0.04 0.12
 -8 3 8 0.15 0.13
 8 -3 -8 0.33 0.14
 8 -3 -8 0.48 0.22
 -8 -3 8 0.24 0.19
 -8 3 7 11.78 0.71
 -8 3 7 11.74 0.59
 -8 -3 7 10.3 0.71
 -8 -3 7 11.1 0.72
 8 -3 -7 10.26 0.65
 8 3 -6 2.43 0.24
 8 -3 -6 2.63 0.33
 -8 3 5 1.15 0.37
 -8 3 5 1.41 0.41
 -8 -3 5 1.89 0.4
 -8 3 4 10.92 1.1
 -8 3 4 10.05 1.05
 -8 3 4 8.95 0.91
 -8 -3 4 10.47 0.82
 8 3 -3 15.56 1.28
 -8 3 3 19.18 1.48
 -8 3 3 16.01 1.12
 -8 3 3 16.76 1.2
 -8 3 2 34.92 2.41
 8 3 -2 32.52 2.1
 -8 3 2 33.6 1.84
 8 3 -1 16.33 1.24
 -8 3 1 17.38 1.43
 -8 3 1 18.53 1.12
 -8 -3 1 15.85 1.39
 -8 -3 0 4.59 0.71
 -8 -3 -1 36.55 2.62
 8 3 2 18.51 1.26
 -8 3 -2 17.5 1.43
 -8 3 -2 17.25 1.09
 8 -3 2 12 1.27
 8 3 3 2.28 0.51
 -8 3 -3 2.68 0.46
 -8 3 -3 2.85 0.59
 8 -3 3 2.35 0.47
 -8 -3 -3 1.32 0.47
 -8 3 -4 0.64 0.34
 -8 -3 -4 -0.06 0.57
 8 -3 4 0.96 0.38
 8 -3 4 0.64 0.32
 -8 -3 -5 8.62 0.96
 8 -3 5 8.89 0.89
 -8 -3 -5 3.76 1.43
 8 3 6 4.52 0.42
 8 3 6 4.82 0.36
 8 3 6 5.24 0.49
 -8 -3 -6 5.72 0.44
 -8 -3 -6 5.03 0.51
 -8 -3 -6 4.43 0.98
 8 3 7 3.12 0.33
 8 3 7 3.24 0.38
 -8 -3 -7 4.15 0.88
 -8 -3 -7 2.74 0.38
 -8 -3 -7 3.42 0.4
 8 3 8 3.51 0.41
 8 3 8 3.9 0.34
 8 -3 8 4.47 0.44
 -8 -3 -8 4.35 0.45
 -8 -3 -8 5.07 0.58
 8 3 9 -0.01 0.13
 -8 -3 -9 -0.03 0.1
 8 -3 9 0.07 0.17
 8 3 10 0.02 0.08
 8 -3 10 0.01 0.11
 8 -3 10 -0.13 0.1
 8 -4 -10 0.1 0.12
 -8 -4 10 0.29 0.1
 8 -4 -9 1.28 0.26
 8 -4 -9 1.13 0.14
 -8 -4 9 1.71 0.24
 -8 4 8 0.14 0.09
 -8 -4 8 0.06 0.18
 8 -4 -8 -0.18 0.1
 -8 4 7 0.05 0.09
 8 -4 -7 0.02 0.16
 -8 4 6 0.03 0.12
 8 -4 -6 0.2 0.22
 -8 4 5 7.9 0.89
 -8 4 5 6.46 0.46
 -8 4 5 7.73 0.92
 -8 4 4 0.44 0.27
 -8 4 4 0.57 0.41
 -8 4 4 0.52 0.3
 -8 4 3 0.53 0.3
 -8 4 3 0.28 0.35
 -8 4 3 0.53 0.24
 8 -4 -3 0.38 0.3
 -8 4 2 3.55 0.64
 8 4 -2 3.19 0.62
 -8 4 2 3.36 0.5
 -8 4 2 2.99 0.51
 8 -4 -2 2.54 0.5
 8 4 -1 0.41 0.46
 8 4 -1 0.84 0.35
 -8 4 1 0.52 0.22
 -8 4 1 0.79 0.38
 8 -4 -1 0.47 0.32
 8 -4 -1 0.64 0.26
 -8 -4 1 0.97 0.38
 8 4 0 3.42 0.63
 -8 4 0 2 0.36
 8 4 0 3.35 0.53
 -8 4 0 2.9 0.55
 -8 -4 0 1.86 0.46
 8 -4 0 0.6 0.26
 8 -4 0 0.79 0.32
 -8 4 -1 0.17 0.18
 -8 4 -1 0.12 0.25
 8 4 1 0.13 0.2
 8 -4 1 0.07 0.2
 -8 -4 -1 -0.13 0.18
 8 -4 1 0.19 0.18
 -8 4 -2 4.25 0.69
 -8 4 -2 2.84 0.45
 -8 -4 -2 3.09 0.69
 -8 4 -3 5.39 0.64
 -8 4 -3 5.58 0.84
 -8 -4 -3 3.19 0.72
 -8 -4 -4 1.86 0.71
 8 -4 4 2.68 0.57
 8 -4 4 2.04 0.48
 8 4 5 9.27 0.6
 -8 4 -5 9.17 0.5
 -8 -4 -5 4.08 1.15
 -8 -4 -5 8.73 0.89
 8 -4 5 9.51 0.99
 8 4 6 4.92 0.46
 -8 4 -6 5.14 0.4
 8 4 6 3.98 0.35
 -8 -4 -6 3.28 0.95
 -8 -4 -6 4.19 0.39
 8 4 7 15.7 0.77
 8 4 7 14.73 0.89
 -8 -4 -7 16.27 0.98
 -8 -4 -7 15.23 1.5
 -8 -4 -7 14.57 0.84
 8 4 8 0.12 0.13
 -8 -4 -8 0.39 0.39
 -8 -4 -8 -0.22 0.15
 8 4 9 0.85 0.15
 -8 -4 -9 0.77 0.19
 8 -4 9 0.68 0.19
 -8 -4 -10 0.87 0.12
 8 -4 10 1.03 0.17
 8 -4 10 0.73 0.2
 8 -5 -10 -0.02 0.12
 -8 -5 10 0.36 0.11
 8 -5 -9 1.6 0.19
 -8 -5 9 1.51 0.24
 8 -5 -9 1.65 0.28
 8 -5 -8 2.81 0.31
 -8 -5 8 2.41 0.35
 8 -5 -7 17.05 0.93
 -8 5 6 5.74 0.32
 8 -5 -6 6.3 0.55
 -8 5 5 0.1 0.07
 -8 5 5 0.57 0.38
 -8 5 4 5.56 0.81
 -8 5 4 5.94 0.99
 -8 5 4 4.7 0.7
 -8 5 3 -0.11 0.14
 -8 5 3 0.36 0.42
 -8 5 3 0.04 0.3
 8 5 -2 -0.68 0.41
 -8 5 2 1.19 0.32
 -8 5 2 0.15 0.21
 -8 5 2 0.36 0.33
 -8 5 1 0.79 0.35
 -8 5 1 0.38 0.32
 8 5 -1 -0.3 0.52
 -8 5 1 0.71 0.26
 -8 -5 1 0.5 0.3
 -8 5 0 0.12 0.18
 -8 5 0 0.07 0.23
 8 5 0 -0.2 0.33
 -8 -5 0 0.1 0.3
 8 -5 0 0.14 0.22
 -8 5 -1 0.39 0.27
 8 5 1 1.1 0.44
 -8 5 -1 0.04 0.32
 -8 -5 -1 -0.26 0.17
 -8 5 -2 10.64 0.96
 -8 5 -2 11.59 1.2
 -8 -5 -2 10.09 1.29
 -8 5 -3 6.3 0.9
 -8 5 -3 5.42 0.68
 -8 -5 -3 4.56 0.87
 8 5 4 0.13 0.12
 -8 -5 -4 -0.48 0.3
 8 -5 4 0.25 0.25
 -8 5 -5 4.26 0.35
 8 5 5 4.64 0.4
 -8 -5 -5 3.82 0.59
 -8 -5 -5 3.49 0.4
 -8 5 -6 3.7 0.34
 8 5 6 3.36 0.33
 -8 -5 -6 2.74 0.7
 -8 -5 -6 2.71 0.33
 8 5 7 0.24 0.13
 -8 5 -7 0.24 0.14
 -8 -5 -7 0.09 0.2
 -8 -5 -7 0.91 1.07
 8 5 8 2.9 0.25
 -8 5 -8 3.33 0.32
 -8 -5 -8 3.59 0.77
 -8 -5 -8 2.85 0.37
 -8 -5 -8 2.42 0.34
 -8 -5 -9 1.71 0.33
 8 -5 9 2.64 0.28
 -8 -5 -9 1.95 0.27
 8 -5 10 0.15 0.1
 -8 -5 -10 0.12 0.08
 8 -5 10 0.22 0.15
 8 -6 -10 0.83 0.15
 -8 -6 10 1.05 0.15
 8 -6 -9 2.41 0.22
 -8 -6 9 2.85 0.3
 8 -6 -8 0.79 0.18
 8 -6 -7 4.25 0.42
 8 6 -6 7.29 0.48
 -8 6 6 8.21 1.01
 -8 6 5 -0.18 0.3
 8 6 -5 0.37 0.14
 -8 6 4 2.94 0.84
 -8 6 4 2.56 0.63
 -8 6 4 3.5 0.3
 8 6 -4 4.41 0.27
 -8 6 3 1.3 0.38
 -8 6 3 1.28 0.49
 -8 6 3 1.88 0.5
 -8 6 2 9.32 0.92
 -8 6 2 8.52 0.96
 -8 6 2 8.76 1.21
 8 6 -2 6.77 1.06
 -8 6 1 3.49 0.71
 -8 6 1 4.05 0.68
 -8 6 1 2.64 0.49
 8 6 -1 4.13 0.88
 -8 6 0 0.69 0.27
 8 6 0 0.81 0.64
 -8 6 0 0.85 0.39
 -8 -6 0 -0.1 0.35
 -8 6 -1 16.73 1.22
 8 6 1 17.22 1.33
 -8 6 -1 17.28 1.57
 -8 -6 -1 14.59 1.51
 -8 6 -2 1.38 0.35
 -8 6 -2 1.28 0.53
 -8 -6 -2 0.6 0.38
 8 6 3 0.14 0.53
 -8 6 -3 1.35 0.44
 -8 -6 -3 0.39 0.5
 8 6 4 6.59 0.38
 -8 6 -4 6.05 0.39
 8 6 5 0.75 0.14
 -8 6 -5 1.27 0.19
 -8 -6 -5 0.96 0.39
 -8 -6 -5 1.04 0.26
 -8 6 -6 0.27 0.13
 8 6 6 0.31 0.09
 -8 -6 -6 0.63 0.78
 -8 -6 -6 0.18 0.18
 -8 6 -7 -0.07 0.09
 -8 -6 -7 0.59 1.06
 -8 -6 -7 0 0.16
 -8 6 -8 0.21 0.12
 -8 -6 -8 0.53 0.3
 -8 -6 -8 0.89 0.72
 -8 6 -9 0.42 0.12
 -8 -6 -9 0.01 0.14
 -8 -6 -9 -0.1 0.19
 -8 -7 9 1.38 0.22
 -8 7 8 0.51 0.39
 8 7 -8 0.8 0.17
 8 -7 -8 0.9 0.18
 8 7 -7 0.66 0.17
 -8 7 7 0.56 0.42
 8 -7 -7 0.76 0.2
 -8 7 6 2.82 0.65
 8 7 -6 2.87 0.31
 -8 7 5 7.49 0.95
 8 7 -5 7.02 0.45
 8 7 -4 1.45 0.2
 -8 7 4 1.43 0.2
 -8 7 4 1.18 0.4
 -8 7 3 0.15 0.25
 8 7 -3 0.23 0.17
 8 7 -2 2.28 0.94
 8 7 -2 1.99 0.31
 -8 7 2 2.2 0.53
 -8 7 2 2.07 0.23
 -8 7 2 2.78 0.79
 -8 7 2 3.49 0.59
 -8 7 1 0.69 0.37
 -8 7 1 2.36 0.33
 -8 7 1 2.13 0.53
 -8 7 1 1.91 0.59
 8 7 -1 0.54 0.6
 -8 7 0 0.96 0.53
 -8 7 0 1.31 0.31
 8 7 0 0.37 0.54
 -8 7 0 1.13 0.37
 -8 7 -1 5.93 0.97
 -8 7 -1 4.01 0.63
 -8 7 -1 4.4 0.55
 8 7 1 5.15 0.75
 -8 -7 -1 4.92 0.93
 -8 7 -2 10.99 1.12
 -8 7 -2 10.81 1.4
 8 7 2 11.55 1.07
 -8 7 -2 9.45 0.5
 -8 7 -2 9.11 0.81
 8 7 2 10.54 0.59
 -8 -7 -2 12.73 1.53
 -8 7 -3 15.22 0.73
 8 7 3 15.95 1.24
 -8 7 -3 16.43 1.11
 -8 7 -4 32.65 1.42
 8 7 4 33.38 2.06
 -8 -7 -4 36.14 1.98
 -8 7 -5 0.45 0.13
 -8 -7 -5 0.17 0.22
 -8 -7 -5 0.42 0.23
 -8 7 -6 10.38 0.57
 -8 -7 -6 11.39 0.68
 -8 -7 -6 8.87 1.03
 -8 7 -7 3.98 0.34
 -8 -7 -7 4.13 0.39
 -8 -7 -7 3 1.13
 -8 -7 -8 1.04 0.66
 -8 -7 -8 -0.13 0.28
 -8 7 -9 0.37 0.11
 -8 -7 -9 0.24 0.21
 -8 -7 -9 0.18 0.14
 8 -8 -9 0.03 0.07
 -8 -8 9 0.08 0.13
 8 8 -8 0.18 0.11
 8 -8 -8 0.19 0.11
 -8 8 7 0.74 0.41
 8 8 -7 1.03 0.19
 8 -8 -7 1.13 0.24
 -8 8 6 0.06 0.34
 8 8 -6 -0.01 0.1
 -8 8 5 0.36 0.14
 -8 8 5 0.15 0.33
 8 8 -5 0.46 0.14
 8 8 -4 3.96 0.33
 -8 8 4 3.95 0.71
 -8 8 4 4.4 0.36
 8 8 -3 10.46 0.6
 -8 8 3 10.08 0.56
 -8 8 3 11.06 1.2
 -8 8 3 11.12 0.88
 -8 8 2 14.84 1.41
 8 8 -2 14.56 0.78
 -8 8 2 14.49 1.07
 -8 8 2 13.4 0.69
 8 8 -2 17.27 1.75
 8 8 -1 6.92 0.54
 -8 8 1 6.61 0.94
 8 8 -1 7.44 0.52
 -8 8 1 8.06 0.76
 8 8 -1 8.61 1.33
 -8 8 1 6.45 0.4
 8 8 0 5.31 0.46
 -8 8 0 5.36 0.32
 -8 8 0 4.71 0.59
 8 8 0 4.59 1.09
 8 8 1 0.41 0.23
 -8 8 -1 0.5 0.3
 -8 8 -1 0.23 0.11
 8 8 1 -0.03 0.37
 8 8 2 5.33 0.43
 -8 8 -2 5 0.61
 8 8 2 4.72 0.85
 -8 8 -2 5.15 0.32
 8 8 3 4.06 0.37
 8 8 3 4.57 0.86
 -8 8 -3 4 0.29
 -8 8 -4 8.56 0.47
 -8 8 -5 20.9 0.92
 -8 -8 -5 18.03 1.36
 -8 8 -6 1.11 0.17
 -8 -8 -6 0.93 0.23
 -8 -8 -6 1.17 0.78
 -8 8 -7 -0.03 0.07
 -8 -8 -7 -0.44 0.67
 -8 -8 -7 0.04 0.23
 -8 8 -8 0.77 0.14
 -8 -8 -8 0.63 0.53
 -8 -8 -8 0.64 0.28
 8 9 -8 2.29 0.21
 8 -9 -8 2.01 0.22
 -8 9 7 -0.17 0.18
 8 9 -7 0.21 0.09
 8 -9 -7 -0.06 0.13
 -8 9 6 0.34 0.33
 -8 9 6 0.22 0.13
 8 9 -6 0.46 0.14
 -8 9 5 7.13 0.45
 8 9 -5 6.73 0.43
 -8 9 5 6.65 0.94
 8 9 -4 1.63 0.2
 -8 9 4 1.62 0.45
 -8 9 4 1.57 0.21
 -8 9 4 1.57 0.36
 -8 9 3 2.69 0.59
 -8 9 3 2.37 0.43
 -8 9 3 1.99 0.23
 8 9 -3 1.61 0.28
 -8 9 2 4.15 0.34
 -8 9 2 4.58 0.55
 8 9 -2 4.14 1.02
 -8 9 2 4.02 0.77
 8 9 -2 4.77 0.41
 8 9 -1 0.09 0.26
 -8 9 1 -0.1 0.23
 8 9 -1 0.46 0.77
 -8 9 1 0.18 0.1
 -8 9 0 -0.07 0.09
 -8 9 0 0.08 0.25
 8 9 0 -0.07 0.28
 8 9 0 0.09 0.96
 -8 9 -1 1.3 0.17
 8 9 1 0.92 0.8
 8 9 1 1.33 0.31
 -8 9 -1 1.5 0.34
 -8 9 -2 1.1 0.37
 8 9 2 1.98 0.71
 8 9 2 1.59 0.29
 8 9 2 1.58 0.76
 -8 9 -2 1.77 0.19
 8 9 3 1.07 0.27
 -8 9 -3 1.02 0.15
 8 9 3 1.14 0.58
 -8 9 -4 0.14 0.1
 8 9 4 0.21 0.25
 -8 9 -5 0.13 0.09
 -8 -9 -5 -0.41 0.34
 -8 9 -6 0.02 0.07
 -8 -9 -6 0.03 0.16
 -8 -9 -6 0.38 0.56
 -8 9 -7 1.31 0.16
 -8 -9 -7 1.34 0.87
 -8 -9 -7 1.55 0.31
 -8 9 -8 0.06 0.08
 -8 -9 -8 0.1 0.19
 -8 -9 -8 0.26 0.31
 8 10 -7 0.01 0.08
 8 -10 -7 0.08 0.13
 -8 10 6 0.9 0.4
 -8 10 6 1.07 0.19
 8 10 -6 1.08 0.16
 -8 10 5 0 0.08
 8 10 -5 -0.05 0.1
 -8 10 5 0.03 0.33
 -8 10 5 -0.08 0.17
 -8 10 4 -0.01 0.1
 8 10 -4 -0.07 0.07
 -8 10 4 0.18 0.35
 -8 10 4 0 0.21
 -8 10 3 1.67 0.33
 -8 10 3 0.91 0.16
 8 10 -3 0.92 0.18
 -8 10 3 1.92 0.51
 -8 10 2 0.08 0.1
 -8 10 2 0.03 0.39
 8 10 -2 -0.02 0.23
 8 10 -2 0.4 0.78
 -8 10 2 -0.05 0.15
 8 10 -1 4.98 0.48
 8 10 -1 5.91 1.1
 -8 10 1 6.16 0.65
 -8 10 1 5.09 0.34
 8 10 0 -0.31 1.03
 8 10 0 0.11 0.28
 -8 10 0 0.11 0.23
 -8 10 0 0.04 0.09
 8 10 0 0.39 0.3
 -8 10 -1 0.45 0.11
 8 10 1 -0.28 0.36
 8 10 1 -0.15 0.98
 -8 10 -1 -0.07 0.24
 -8 10 -2 0.1 0.08
 -8 10 -2 -0.01 0.16
 8 10 2 -0.37 0.52
 8 10 2 -0.04 0.28
 8 10 3 0.25 0.28
 -8 10 -3 0.07 0.09
 8 10 3 -0.47 0.69
 -8 10 -4 0.91 0.14
 8 10 4 1.11 0.31
 -8 10 -5 1.56 0.18
 -8 -10 -5 1.25 0.58
 -8 10 -6 0.67 0.11
 -8 -10 -6 0.1 0.22
 -8 -10 -6 1.33 0.8
 -8 10 -7 0.98 0.12
 -8 -10 -7 0.8 0.6
 -8 -10 -7 1.05 0.25
 -8 11 6 0.1 0.14
 8 11 -6 0.13 0.08
 -8 11 6 -0.02 0.08
 -8 11 5 2.12 0.53
 8 11 -5 2.49 0.23
 -8 11 5 2.21 0.23
 -8 11 5 2.14 0.34
 -8 11 4 0.39 0.41
 -8 11 4 0.15 0.09
 8 11 -4 0.05 0.09
 -8 11 4 0.27 0.21
 -8 11 3 0.02 0.08
 -8 11 3 0.21 0.17
 -8 11 3 0.14 0.35
 8 11 -3 -0.02 0.08
 8 11 -2 1.1 1.06
 8 11 -2 0.35 0.25
 -8 11 2 -0.21 0.42
 -8 11 2 0.17 0.23
 -8 11 2 0.26 0.1
 8 11 -1 0.25 1.08
 8 11 -1 -0.15 0.29
 -8 11 1 0.04 0.2
 -8 11 1 0.05 0.09
 8 11 0 0.54 1.08
 -8 11 0 0.4 0.19
 -8 11 0 0.09 0.09
 8 11 0 0.3 0.28
 8 11 1 0.48 0.3
 -8 11 -1 0.5 0.25
 8 11 1 -0.91 0.97
 8 11 1 0.32 0.35
 -8 11 -1 0.52 0.11
 -8 11 -2 1.55 0.16
 8 11 2 1.02 0.34
 8 11 2 1.82 1.04
 8 11 3 0.4 0.37
 8 11 3 0.56 0.65
 -8 11 -3 0.18 0.08
 8 11 4 0.62 0.6
 8 11 4 -0.12 0.28
 -8 11 -4 -0.09 0.06
 8 11 5 0.36 0.32
 -8 11 -5 0.34 0.08
 8 11 5 0.1 0.25
 -8 -11 -5 -0.55 0.58
 -8 11 -6 1.31 0.13
 -8 -11 -6 1.44 0.3
 -8 -11 -6 0.77 0.62
 -8 12 5 1.12 0.14
 8 12 -5 1.12 0.14
 -8 12 5 0.62 0.18
 -8 12 4 4.55 0.29
 -8 12 4 3.41 0.41
 8 12 -4 4.89 0.28
 -8 12 3 0.61 0.24
 8 12 -3 0.81 0.13
 -8 12 3 1.15 0.14
 8 12 -2 0.01 0.12
 -8 12 2 0.07 0.2
 -8 12 2 0.3 0.1
 8 12 -1 0.61 0.28
 -8 12 1 0.79 0.22
 -8 12 1 0.95 0.13
 8 12 -1 0.99 1.04
 8 12 0 -0.39 1
 8 12 0 0.54 0.26
 -8 12 0 0.27 0.17
 -8 12 0 0.42 0.09
 -8 12 -1 1.3 0.13
 8 12 1 1.24 0.3
 8 12 1 0.87 0.99
 -8 12 -1 0.96 0.27
 8 12 2 0.21 0.33
 -8 12 -2 0.1 0.06
 8 12 2 0.52 0.28
 8 12 2 0.41 0.91
 -8 12 -3 2.24 0.15
 8 12 3 1.92 0.32
 8 12 3 2.25 0.32
 8 12 3 1.53 0.88
 8 12 4 0.17 0.25
 8 12 4 0.32 0.3
 8 12 5 1.15 0.3
 -8 -12 -5 1.18 0.26
 -8 13 3 0.37 0.15
 8 13 -3 0.28 0.07
 -8 13 3 0.38 0.09
 8 13 -2 0.56 0.1
 -8 13 2 0.6 0.09
 -8 13 2 0.47 0.19
 8 13 -1 1.84 0.19
 -8 13 1 1.87 0.15
 -8 13 1 2.25 0.31
 -8 13 0 1.41 0.27
 8 13 0 1.83 0.27
 -8 13 0 1.47 0.12
 8 13 1 -0.1 0.2
 8 13 2 -0.08 0.26
 8 13 3 0.7 0.22
 -9 0 10 0.29 0.14
 -9 0 10 0.35 0.09
 -9 0 9 -0.05 0.08
 -9 0 9 -0.08 0.14
 9 0 -9 0.04 0.08
 -9 0 8 29.66 1.37
 9 0 -8 30.07 1.5
 9 0 -7 0.06 0.15
 -9 0 7 0.12 0.17
 -9 0 6 31.49 1.47
 9 0 -6 30.15 1.4
 9 0 -6 33.01 1.63
 -9 0 5 -0.04 0.26
 -9 0 4 2.03 0.51
 -9 0 4 1.77 0.35
 -9 0 3 -0.09 0.15
 9 0 -3 -0.09 0.49
 -9 0 3 0.04 0.15
 -9 0 3 -0.16 0.26
 9 0 -2 1.2 0.47
 -9 0 2 1.06 0.24
 -9 0 2 1.42 0.39
 9 0 -2 1.01 0.51
 9 0 -1 0.2 0.31
 9 0 -1 -0.06 0.2
 -9 0 1 0.05 0.15
 -9 0 1 -0.09 0.16
 -9 0 0 12.5 1.08
 -9 0 0 10.72 0.72
 9 0 0 10.92 0.94
 9 0 0 9.61 0.86
 -9 0 -1 0.09 0.11
 9 0 1 -0.09 0.21
 -9 0 -1 0.01 0.18
 9 0 1 0.02 0.16
 9 0 2 4.95 0.61
 -9 0 -2 4.7 0.73
 -9 0 -2 4.14 0.45
 9 0 2 4.3 0.55
 -9 0 -3 0.25 0.28
 9 0 3 0.41 0.23
 9 0 4 16.61 1.35
 -9 0 -4 16.35 1.55
 -9 0 -5 -0.02 0.14
 -9 0 -5 0.47 0.28
 -9 0 -5 -0.29 0.47
 -9 0 -6 0.61 0.16
 -9 0 -6 0.66 0.32
 9 0 6 0.52 0.2
 -9 0 -7 -0.06 0.09
 -9 0 -7 0.34 0.22
 9 0 7 -0.11 0.21
 9 0 7 0.08 0.15
 9 0 8 1.3 0.21
 9 0 8 1.16 0.25
 -9 0 -8 1.11 0.15
 9 0 9 0.37 0.16
 9 0 9 0.03 0.13
 9 0 10 3.31 0.25
 9 0 10 2.6 0.31
 -9 1 10 0.86 0.15
 -9 -1 10 0.64 0.13
 -9 -1 10 0.85 0.19
 -9 1 9 7.03 0.51
 -9 1 9 7.21 0.42
 9 -1 -9 6.77 0.48
 -9 -1 9 6.95 0.43
 -9 -1 9 6.75 0.56
 9 1 -8 0.23 0.12
 -9 1 8 0.28 0.11
 -9 1 8 0.37 0.18
 9 -1 -8 0.37 0.15
 -9 -1 8 0.33 0.17
 9 1 -7 27.38 1.35
 -9 1 7 25.71 1.21
 -9 -1 7 25.84 1.28
 9 -1 -7 25.66 1.42
 9 -1 -7 26.25 1.2
 -9 1 6 -0.23 0.14
 9 1 -6 0.19 0.16
 9 -1 -6 0.16 0.18
 9 -1 -6 0.18 0.17
 -9 -1 6 0.17 0.16
 -9 -1 6 0.17 0.18
 -9 1 5 0.62 0.35
 -9 -1 5 0.16 0.32
 -9 1 4 9.36 1.02
 -9 1 4 8.7 0.85
 9 -1 -4 5.91 1.36
 -9 -1 4 10.8 0.85
 -9 -1 4 11.98 0.96
 -9 1 3 7.28 0.84
 -9 1 3 5.17 0.62
 -9 1 3 6.05 0.73
 9 -1 -3 1.62 1.08
 -9 -1 3 5.7 0.61
 -9 -1 3 6.31 0.75
 -9 1 2 0.35 0.28
 -9 1 2 0.45 0.19
 9 1 -2 0.43 0.26
 9 -1 -2 -0.07 0.67
 9 -1 -2 0.44 0.64
 -9 -1 2 0.52 0.19
 -9 -1 2 0.36 0.26
 -9 1 1 14.44 1.19
 -9 1 1 11.13 0.84
 9 1 -1 14.06 0.96
 9 1 -1 12.22 1.04
 -9 -1 1 13.87 1.18
 -9 -1 1 12.51 0.81
 9 -1 -1 10.52 1.15
 9 1 0 3.75 0.54
 -9 1 0 4.18 0.46
 -9 1 0 3.57 0.63
 9 1 0 4.09 0.47
 -9 -1 0 4.15 0.41
 9 -1 0 4.24 0.61
 -9 -1 0 4.03 0.67
 9 -1 0 4.06 0.69
 -9 1 -1 1.94 0.33
 -9 1 -1 1.05 0.4
 9 1 1 1.72 0.34
 9 1 1 1.81 0.38
 9 -1 1 1.66 0.41
 9 -1 1 2.67 0.43
 -9 -1 -1 1.64 0.54
 -9 1 -2 0.6 0.36
 9 1 2 0.09 0.18
 -9 1 -2 -0.02 0.18
 9 1 2 0.06 0.16
 9 -1 2 0.17 0.18
 -9 -1 -2 0.59 0.52
 -9 1 -3 1.96 0.48
 9 1 3 1.06 0.33
 9 -1 3 0.97 0.3
 9 -1 3 1.16 0.31
 -9 -1 -3 1.06 0.58
 -9 1 -4 1.93 0.53
 9 1 4 1.19 0.4
 -9 -1 -4 1.88 0.73
 -9 1 -5 4.57 0.55
 -9 1 -5 4.36 0.38
 -9 -1 -5 5.95 1.2
 -9 -1 -5 4.93 0.46
 -9 -1 -5 4.61 0.57
 9 1 6 0.45 0.22
 -9 1 -6 0.3 0.14
 9 1 6 0.46 0.18
 -9 1 -6 0.4 0.24
 -9 -1 -6 0.22 0.17
 9 -1 6 0.43 0.24
 -9 -1 -6 0.87 0.33
 9 1 7 0.2 0.17
 -9 1 -7 0.1 0.09
 9 1 7 -0.03 0.11
 -9 -1 -7 -0.2 0.12
 9 -1 7 -0.03 0.17
 -9 -1 -7 -0.29 0.25
 9 1 8 -0.16 0.14
 9 1 8 0.26 0.16
 9 1 8 -0.19 0.2
 9 -1 8 0.1 0.21
 -9 -1 -8 0.18 0.13
 9 -1 8 0.39 0.21
 9 1 9 1.01 0.24
 9 1 9 0.8 0.17
 9 1 9 0.96 0.14
 9 -1 9 1.36 0.2
 9 -1 9 1.1 0.24
 9 1 10 0.14 0.14
 9 -1 10 0.09 0.11
 9 -1 10 0.04 0.09
 9 -1 10 0.69 0.21
 -9 2 10 0.23 0.1
 -9 -2 10 0.43 0.12
 -9 -2 10 0.22 0.09
 9 -2 -10 0.37 0.1
 -9 -2 10 0.49 0.17
 -9 2 9 1.27 0.2
 9 -2 -9 1.67 0.25
 -9 -2 9 1.51 0.21
 -9 2 8 0.58 0.14
 -9 2 8 0.59 0.17
 9 -2 -8 0.75 0.2
 -9 -2 8 0.59 0.19
 9 -2 -8 0.56 0.12
 9 2 -7 0.13 0.1
 9 -2 -7 0.37 0.16
 9 -2 -7 0.12 0.22
 -9 -2 7 0.32 0.19
 -9 -2 7 0.26 0.18
 9 2 -6 1.36 0.24
 9 -2 -6 1.71 0.31
 -9 -2 6 1.77 0.27
 9 -2 -6 1.78 0.26
 9 2 -5 1.49 0.24
 -9 2 5 1.18 0.43
 -9 2 5 0.78 0.33
 -9 -2 5 0.98 0.34
 -9 2 4 1.61 0.42
 -9 2 4 2.63 0.54
 -9 -2 4 1.39 0.35
 9 -2 -4 0.23 0.95
 -9 2 3 0.03 0.21
 -9 2 3 -0.19 0.12
 -9 2 3 0 0.19
 -9 -2 3 -0.22 0.17
 9 -2 -3 0.55 0.66
 9 2 -2 16.03 1.29
 -9 2 2 17.82 1.42
 -9 2 2 16.19 1.08
 -9 2 2 14.42 1.13
 -9 -2 2 16.37 1.32
 -9 2 1 0.05 0.17
 9 2 -1 -0.22 0.15
 -9 2 1 -0.02 0.17
 9 -2 -1 -0.35 0.3
 9 -2 -1 0.14 0.44
 -9 -2 1 -0.12 0.15
 -9 2 0 20.74 1.73
 9 2 0 24.01 1.6
 -9 2 0 22.58 1.33
 -9 -2 0 24.55 1.86
 -9 2 -1 0.69 0.28
 -9 2 -1 0.36 0.21
 9 2 1 0.26 0.2
 -9 -2 -1 -0.01 0.39
 9 -2 1 0.43 0.31
 9 -2 1 0.66 0.54
 -9 2 -2 17.6 1.46
 -9 2 -2 16.19 1.07
 9 2 2 18.09 1.28
 -9 -2 -2 11.12 1.48
 9 -2 2 17.73 1.3
 -9 2 -3 4.05 0.69
 -9 2 -3 3.5 0.49
 -9 -2 -3 3.85 0.94
 9 -2 3 2.61 0.49
 -9 2 -4 9.78 1.22
 9 -2 4 10.91 0.94
 -9 -2 -4 6.9 1.34
 -9 2 -5 4.72 0.6
 -9 -2 -5 4.59 0.67
 -9 -2 -5 6.12 1.61
 9 -2 5 4.12 0.61
 -9 -2 -5 4.35 0.46
 9 2 6 5.42 0.54
 9 2 6 4.76 0.4
 9 2 6 5.38 0.48
 -9 -2 -6 5 0.49
 -9 -2 -6 4.85 0.71
 -9 -2 -6 4.65 0.42
 9 2 7 8.82 0.67
 9 2 7 9.27 0.63
 9 2 7 8.98 0.53
 9 -2 7 9.08 0.64
 -9 -2 -7 8.92 0.79
 -9 -2 -7 10.08 0.66
 9 2 8 4 0.26
 9 2 8 3.84 0.45
 9 2 8 2.99 0.34
 -9 -2 -8 3.55 0.37
 -9 -2 -8 3.69 0.51
 9 -2 8 4.25 0.4
 9 2 9 1.49 0.19
 9 2 9 1.85 0.28
 -9 -2 -9 1.58 0.19
 9 -2 9 1.53 0.22
 9 -2 9 1.92 0.28
 9 2 10 3.41 0.27
 9 -2 10 3.38 0.25
 9 -2 10 3.54 0.31
 9 -3 -10 0.6 0.13
 -9 -3 10 0.46 0.11
 -9 3 9 0.01 0.08
 9 -3 -9 0.07 0.14
 -9 -3 9 0.2 0.16
 -9 3 8 2.84 0.3
 -9 -3 8 2.82 0.32
 9 -3 -8 2.63 0.38
 9 -3 -8 2.92 0.27
 -9 3 7 7.79 0.55
 -9 -3 7 7.93 0.58
 -9 -3 7 7.62 0.55
 9 -3 -7 8.5 0.54
 9 3 -6 11.28 0.62
 -9 3 6 11.25 0.6
 9 -3 -6 11.98 0.81
 9 -3 -6 11.12 0.69
 -9 -3 6 11.53 0.73
 -9 3 5 -0.08 0.31
 9 3 -5 0.11 0.12
 -9 3 5 0.52 0.33
 -9 3 4 2.94 0.52
 -9 3 4 3.03 0.66
 -9 3 4 2.72 0.53
 -9 3 3 0.05 0.25
 -9 3 3 0.03 0.13
 -9 3 3 0.21 0.3
 9 -3 -3 -0.44 0.39
 -9 3 2 2.39 0.45
 -9 3 2 2.2 0.42
 -9 3 2 2.07 0.53
 9 3 0 23.85 1.59
 -9 3 0 22.32 1.77
 -9 3 0 22.76 1.35
 -9 -3 0 17.91 1.71
 -9 3 -1 13.72 1.2
 9 3 1 12.99 1.08
 -9 3 -1 12.24 0.88
 9 -3 1 7.6 0.97
 -9 3 -2 60.06 3.06
 -9 3 -2 61.14 4.03
 9 -3 2 64.04 3.86
 -9 3 -3 2.08 0.51
 -9 3 -3 2.06 0.43
 -9 -3 -3 1.01 0.53
 9 -3 3 1.57 0.4
 -9 3 -4 4.49 0.78
 9 -3 4 3.93 0.62
 -9 -3 -4 1.77 1.12
 9 3 5 1.19 0.25
 -9 3 -5 1.44 0.4
 -9 -3 -5 1.46 0.26
 -9 -3 -5 1.13 0.53
 9 -3 5 0.68 0.33
 9 3 6 0.08 0.12
 9 3 6 0.33 0.17
 9 3 6 0.2 0.15
 -9 -3 -6 0.05 0.21
 -9 -3 -6 0.03 0.29
 -9 -3 -6 -1.24 0.69
 9 3 7 11.69 0.71
 9 3 7 12.23 0.79
 -9 -3 -7 11.69 0.81
 -9 -3 -7 12.79 0.69
 -9 -3 -7 12.67 1.05
 9 3 8 0.02 0.15
 9 3 8 -0.02 0.09
 -9 -3 -8 0 0.25
 9 -3 8 -0.04 0.17
 -9 -3 -8 -0.03 0.15
 9 3 9 3.36 0.31
 -9 -3 -9 2.49 0.27
 9 -3 9 3.33 0.32
 9 -3 9 3.42 0.38
 9 3 10 0.09 0.07
 9 -3 10 0.06 0.11
 9 -3 10 -0.13 0.11
 9 -4 -10 -0.03 0.09
 -9 -4 10 -0.08 0.08
 9 -4 -9 0.1 0.15
 -9 -4 9 0.08 0.15
 -9 4 8 0.1 0.08
 9 -4 -8 0.27 0.16
 -9 -4 8 0.23 0.19
 -9 4 7 1.16 0.18
 9 -4 -7 1.84 0.32
 -9 -4 7 1.48 0.28
 9 -4 -7 1.09 0.22
 -9 4 6 14.75 0.78
 9 -4 -6 13.79 0.83
 -9 4 5 3.96 0.33
 -9 4 5 3.17 0.62
 -9 4 4 2.73 0.67
 -9 4 4 2.1 0.54
 -9 4 4 2.15 0.49
 -9 4 3 -0.08 0.15
 -9 4 3 -0.07 0.2
 -9 4 3 0.15 0.29
 9 -4 -3 -0.09 0.38
 -9 4 2 -0.02 0.29
 -9 4 2 0.16 0.18
 -9 4 2 0.12 0.24
 9 -4 -2 -0.02 0.27
 9 4 -1 15.8 1.18
 -9 4 1 12.44 1.08
 -9 4 1 14.63 1.39
 -9 4 1 16.18 1.09
 -9 -4 1 16.66 1.44
 -9 4 0 6.56 0.7
 9 4 0 6.29 0.82
 -9 4 0 6.94 0.93
 -9 -4 0 3.46 0.74
 -9 -4 -1 6.53 1
 -9 4 -2 2.25 0.44
 -9 4 -2 2.78 0.59
 -9 -4 -2 1.38 0.47
 9 -4 2 0.72 0.5
 -9 4 -3 5.98 0.73
 -9 4 -3 6.24 0.94
 -9 -4 -3 2.7 0.72
 9 -4 3 6.25 0.77
 9 4 4 -0.17 0.1
 9 -4 4 0.23 0.31
 -9 -4 -4 0.04 0.75
 -9 -4 -4 -0.44 0.22
 9 4 5 0.11 0.17
 9 4 5 0.17 0.14
 -9 4 -5 0.54 0.14
 -9 -4 -5 -0.73 0.6
 -9 -4 -5 0.54 0.19
 9 4 6 3.48 0.38
 -9 4 -6 3.8 0.34
 9 4 6 3.71 0.31
 -9 -4 -6 3.27 0.96
 -9 -4 -6 3.35 0.41
 9 4 7 0.12 0.14
 -9 -4 -7 0.3 0.28
 -9 -4 -7 -0.1 0.13
 -9 -4 -7 0.69 0.71
 9 4 8 -0.02 0.1
 9 -4 8 0.24 0.19
 -9 -4 -8 0.08 0.15
 -9 -4 -8 -0.49 0.23
 9 4 9 1.16 0.14
 9 -4 9 1.66 0.24
 -9 -4 -9 1.28 0.21
 9 -4 10 0.16 0.11
 9 -4 10 0.05 0.14
 9 -5 -10 0.16 0.11
 -9 -5 10 0.16 0.1
 9 -5 -9 0.34 0.16
 -9 -5 9 0.26 0.13
 9 -5 -9 0.06 0.08
 -9 -5 8 0.01 0.17
 9 -5 -8 -0.03 0.14
 9 -5 -7 1.64 0.32
 9 -5 -7 2.03 0.28
 -9 5 6 0.8 0.36
 9 -5 -6 1.17 0.27
 -9 5 5 16.3 1.39
 -9 5 4 11.28 1.2
 -9 5 4 10.7 1.08
 -9 5 4 12.87 1.5
 -9 5 3 -0.14 0.25
 -9 5 3 0.61 0.46
 -9 5 3 0.19 0.32
 -9 5 2 4.13 0.61
 9 5 -2 3.82 0.65
 -9 5 2 3.54 0.59
 -9 5 2 4.13 0.77
 9 -5 -2 1.73 0.56
 -9 5 1 0.74 0.36
 -9 5 1 -0.04 0.3
 -9 5 1 0.47 0.33
 9 5 -1 0.41 0.41
 9 -5 -1 0.44 0.37
 -9 5 0 19.24 1.68
 9 5 0 18.16 1.4
 -9 5 0 18.16 1.27
 -9 5 -1 0.12 0.29
 -9 5 -1 0.46 0.39
 -9 -5 -1 0.34 0.4
 -9 5 -2 -0.12 0.17
 -9 5 -2 -0.2 0.22
 -9 -5 -2 -0.23 0.25
 -9 5 -3 0.11 0.42
 9 5 3 0.26 0.15
 -9 5 -3 0.01 0.23
 -9 -5 -3 0.01 0.39
 9 5 4 2.63 0.28
 -9 5 -4 2.41 0.25
 -9 5 -4 2.26 0.44
 -9 -5 -4 1.91 0.5
 -9 5 -5 2.26 0.26
 9 5 5 2.29 0.28
 -9 -5 -5 2.09 0.3
 -9 -5 -5 0.38 0.63
 9 5 6 0.04 0.13
 -9 5 -6 0.24 0.13
 -9 -5 -6 -0.02 0.18
 -9 -5 -6 -0.85 0.6
 -9 5 -7 3.04 0.31
 9 5 7 2.76 0.28
 -9 -5 -7 3.26 0.43
 -9 -5 -7 3.03 0.74
 -9 -5 -7 2.97 0.39
 9 5 8 0.26 0.08
 -9 -5 -8 0.15 0.31
 -9 -5 -8 0.43 0.2
 9 -5 9 0.11 0.14
 -9 -5 -9 0.24 0.23
 -9 -5 -9 -0.05 0.11
 9 -6 -9 -0.13 0.17
 -9 -6 9 0.06 0.12
 9 -6 -9 0.18 0.1
 -9 6 8 0.82 0.36
 9 -6 -8 1.85 0.23
 -9 -6 8 1.82 0.29
 -9 6 7 4.2 0.71
 9 -6 -7 3.13 0.35
 -9 6 6 10.68 1.2
 9 -6 -6 10.74 0.71
 9 6 -5 29.14 1.31
 -9 6 5 30.41 2.06
 9 6 -4 7.42 0.4
 -9 6 4 4.14 0.79
 -9 6 3 1.47 0.49
 -9 6 3 3.34 0.82
 -9 6 3 2.3 0.25
 9 6 -3 2.55 0.24
 -9 6 3 2.54 0.51
 9 6 -2 0.93 0.48
 -9 6 2 0.68 0.35
 -9 6 1 0.6 0.39
 9 6 -1 -0.59 0.41
 -9 6 1 0.19 0.37
 -9 6 1 0.84 0.36
 9 6 0 1.93 0.63
 -9 6 0 1.11 0.49
 -9 6 0 1.66 0.41
 -9 -6 0 0.62 0.51
 -9 6 -1 0.05 0.28
 -9 6 -1 -0.37 0.32
 9 6 1 0.53 0.69
 -9 -6 -1 0.15 0.29
 -9 6 -2 1.92 0.66
 -9 6 -2 1.74 0.5
 -9 6 -2 1.97 0.34
 -9 -6 -2 1.26 0.57
 -9 6 -3 -0.12 0.25
 9 6 3 0.07 0.07
 -9 6 -3 -0.05 0.09
 -9 6 -4 -0.11 0.11
 9 6 4 0.07 0.08
 -9 -6 -4 -0.17 0.31
 -9 6 -5 0.26 0.12
 9 6 5 0.07 0.09
 -9 -6 -5 -0.01 0.37
 -9 -6 -5 0 0.12
 -9 6 -6 1.49 0.22
 -9 -6 -6 0.45 0.94
 -9 -6 -6 1.54 0.28
 -9 6 -7 1.58 0.22
 -9 -6 -7 3.23 1.02
 -9 -6 -7 1.53 0.33
 -9 6 -8 0.18 0.14
 -9 -6 -8 -0.21 0.23
 -9 -6 -8 -0.01 0.12
 -9 -6 -8 0.35 0.38
 -9 6 -9 0.51 0.13
 -9 -6 -9 0.09 0.18
 -9 -6 -9 0.17 0.13
 9 -6 9 0.46 0.16
 -9 -7 9 0.27 0.12
 9 -7 -9 0.03 0.08
 -9 7 8 0.3 0.37
 9 -7 -8 0.4 0.16
 -9 7 7 4.76 0.76
 9 7 -7 4.47 0.38
 9 -7 -7 4.78 0.43
 9 7 -6 5.61 0.44
 -9 7 6 6.24 0.91
 9 -7 -6 5.84 0.52
 -9 7 5 0.66 0.42
 9 7 -5 0.84 0.18
 -9 7 4 25.55 1.77
 9 7 -4 23.4 1.09
 -9 7 4 24.42 1.11
 -9 7 3 3.25 0.3
 -9 7 3 3.32 0.67
 9 7 -3 3.37 0.32
 9 7 -2 0.81 0.76
 9 7 -2 -0.01 0.19
 -9 7 2 0.55 0.19
 -9 7 2 -0.07 0.24
 -9 7 2 0.18 0.11
 -9 7 1 0.22 0.1
 -9 7 1 0.21 0.2
 9 7 -1 1.35 0.88
 -9 7 1 -0.1 0.33
 9 7 -1 0.05 0.23
 -9 7 0 2.49 0.24
 9 7 0 2.61 0.35
 -9 7 0 2.11 0.63
 -9 7 0 2.33 0.4
 9 7 0 3.2 0.37
 9 7 0 2.42 0.94
 -9 7 -1 0.88 0.16
 -9 7 -1 1.15 0.34
 9 7 1 0.73 0.24
 9 7 1 0.52 0.57
 -9 -7 -1 1.45 0.69
 -9 7 -2 -0.03 0.1
 -9 7 -2 0.2 0.18
 -9 7 -3 -0.03 0.08
 -9 7 -3 -0.09 0.25
 -9 7 -4 1.26 0.18
 -9 -7 -4 0.66 0.29
 -9 7 -5 2.56 0.27
 -9 -7 -5 2.93 0.35
 -9 -7 -5 2 0.65
 -9 7 -6 0.26 0.11
 -9 -7 -6 -0.64 0.9
 -9 -7 -6 0.21 0.18
 -9 7 -7 1.03 0.17
 -9 -7 -7 1.57 0.32
 -9 -7 -7 1.76 0.94
 -9 7 -8 0.21 0.1
 -9 -7 -8 0 0.2
 -9 -7 -8 0.58 0.33
 -9 7 -9 0.5 0.13
 -9 -7 -9 0.81 0.16
 9 8 -8 0.1 0.12
 9 -8 -8 0.19 0.12
 -9 8 7 1.46 0.46
 9 8 -7 2.46 0.25
 9 -8 -7 2.25 0.3
 -9 8 6 8.27 1.02
 9 8 -6 8.51 0.5
 -9 8 5 -0.07 0.11
 -9 8 5 0 0.22
 9 8 -5 -0.15 0.09
 9 8 -4 9.16 0.52
 -9 8 4 9.88 1.12
 -9 8 4 8.85 0.53
 -9 8 3 0.5 0.38
 -9 8 3 0.87 0.33
 -9 8 3 0.6 0.15
 9 8 -3 1.05 0.2
 -9 8 2 2.17 0.24
 -9 8 2 3.02 0.5
 9 8 -2 3.55 1.11
 9 8 -2 2.32 0.35
 -9 8 2 2.49 0.56
 -9 8 1 3.25 0.29
 9 8 -1 2.77 1.1
 -9 8 1 3.21 0.48
 9 8 -1 3.01 0.37
 9 8 0 4.52 0.44
 -9 8 0 3.02 0.48
 9 8 0 4.4 0.95
 -9 8 0 3.69 0.29
 9 8 0 3.42 0.41
 -9 8 -1 4.4 0.3
 9 8 1 5.02 0.48
 -9 8 -1 4.15 0.55
 9 8 1 3.9 1.08
 9 8 2 6.66 0.55
 -9 8 -2 5.99 0.37
 -9 8 -2 7.16 0.7
 -9 8 -3 1.17 0.35
 -9 8 -3 1.02 0.16
 -9 8 -4 5.04 0.33
 -9 8 -5 1.82 0.21
 -9 -8 -5 1.34 0.48
 -9 -8 -5 1.67 0.29
 -9 8 -6 -0.09 0.1
 -9 -8 -6 -0.02 0.18
 -9 -8 -6 -0.02 0.64
 -9 8 -7 0.82 0.14
 -9 -8 -7 0.81 0.35
 -9 -8 -7 0.7 0.78
 -9 8 -8 -0.06 0.06
 -9 -8 -8 0.04 0.18
 -9 -8 -8 0.48 0.24
 9 9 -8 0.2 0.08
 9 -9 -8 0.08 0.09
 -9 9 7 -0.2 0.31
 9 9 -7 0.14 0.12
 9 -9 -7 -0.09 0.12
 9 9 -6 0.97 0.18
 -9 9 6 0.91 0.17
 -9 9 6 0.78 0.34
 9 9 -5 0.57 0.14
 -9 9 5 0.62 0.33
 -9 9 5 0.36 0.13
 -9 9 4 4.67 0.77
 9 9 -4 3.27 0.31
 -9 9 4 4.03 0.34
 -9 9 4 4.03 0.53
 -9 9 3 14.44 1.04
 -9 9 3 15.96 1.48
 -9 9 3 13.9 0.7
 9 9 -3 13.04 0.7
 -9 9 2 2.69 0.59
 -9 9 2 1.88 0.22
 9 9 -2 2.53 0.34
 9 9 -2 2.81 1.15
 -9 9 2 2.12 0.39
 -9 9 1 -0.06 0.23
 9 9 -1 0.08 0.26
 9 9 -1 0.38 1.05
 -9 9 1 -0.07 0.07
 -9 9 0 1.43 0.39
 9 9 0 1.27 1.09
 9 9 0 2.03 0.37
 9 9 0 2.46 0.37
 -9 9 0 2.34 0.23
 -9 9 -1 1.53 0.18
 9 9 1 1.8 1.09
 9 9 1 1.57 0.37
 -9 9 -1 1.25 0.32
 -9 9 -2 24.27 1.03
 9 9 2 21.82 1.15
 9 9 2 25.09 2.12
 -9 9 -2 23.64 1.49
 9 9 3 2.41 0.41
 -9 9 -3 3.02 0.26
 -9 9 -4 5.37 0.34
 -9 9 -5 1.7 0.19
 -9 -9 -5 1.61 0.69
 -9 -9 -5 1.2 0.27
 -9 9 -6 0.2 0.08
 -9 -9 -6 0.07 0.21
 -9 -9 -6 0.49 0.84
 -9 9 -7 0.66 0.12
 -9 -9 -7 0.56 0.32
 -9 -9 -7 -0.15 0.41
 9 10 -7 0.03 0.08
 9 -10 -7 0.08 0.14
 9 10 -6 -0.09 0.07
 -9 10 6 0.09 0.11
 -9 10 6 0.27 0.36
 -9 10 5 0.89 0.23
 -9 10 5 1.23 0.18
 9 10 -5 1.4 0.18
 -9 10 5 1.72 0.48
 -9 10 4 0.56 0.14
 -9 10 4 0.6 0.42
 -9 10 4 0.9 0.26
 9 10 -4 0.8 0.15
 9 10 -3 0.24 0.11
 -9 10 3 0.34 0.25
 -9 10 3 -0.08 0.34
 -9 10 3 0.15 0.11
 -9 10 2 0.58 0.23
 9 10 -2 0.83 0.25
 -9 10 2 0.51 0.14
 -9 10 2 0.55 0.47
 9 10 -1 2.26 1.22
 -9 10 1 2.34 0.23
 9 10 -1 1.74 0.33
 -9 10 1 2.38 0.39
 -9 10 0 0.32 0.11
 9 10 0 0.06 0.28
 9 10 0 0.38 1.05
 -9 10 0 0.27 0.24
 -9 10 -1 -0.06 0.24
 9 10 1 0.12 0.31
 9 10 1 0.23 0.37
 -9 10 -1 0.2 0.1
 9 10 1 -0.79 0.98
 9 10 2 0.4 0.33
 -9 10 -2 0.07 0.16
 -9 10 -2 0.28 0.1
 9 10 2 0.56 1.01
 -9 10 -3 0.47 0.12
 9 10 3 0.59 0.34
 9 10 3 -0.43 0.87
 -9 10 -4 0.16 0.08
 9 10 4 0.21 0.32
 -9 10 -5 0.73 0.12
 -9 -10 -5 0.68 0.24
 -9 -10 -5 0.25 0.68
 -9 10 -6 0.96 0.14
 -9 -10 -6 1.42 0.3
 -9 -10 -6 0.59 0.67
 -9 10 -7 0.14 0.07
 -9 -10 -7 0.23 0.21
 -9 -10 -7 0.35 0.29
 -9 11 5 1.42 0.19
 9 11 -5 1.44 0.17
 -9 11 5 1.63 0.29
 9 11 -4 2.08 0.21
 -9 11 4 2.41 0.23
 -9 11 4 2.62 0.39
 -9 11 4 1.39 0.47
 -9 11 3 1.59 0.52
 -9 11 3 1.9 0.36
 9 11 -3 2.14 0.21
 -9 11 3 2.02 0.21
 -9 11 2 -0.07 0.09
 9 11 -2 0.24 0.21
 -9 11 2 -0.19 0.17
 -9 11 1 6.67 0.38
 9 11 -1 6.45 1.35
 -9 11 1 6.07 0.64
 9 11 -1 5.74 0.47
 9 11 0 0.5 0.29
 -9 11 0 0.21 0.21
 -9 11 0 0.31 0.1
 9 11 0 0.79 1.09
 -9 11 -1 0.11 0.07
 9 11 1 0.57 0.3
 -9 11 -1 -0.05 0.2
 9 11 1 -0.43 1
 9 11 2 1.22 1
 -9 11 -2 1.51 0.16
 9 11 2 1.85 0.36
 9 11 2 1.45 0.35
 9 11 3 0.4 0.36
 -9 11 -3 0.45 0.09
 9 11 3 0.65 0.31
 9 11 3 1.38 0.93
 9 11 4 0.57 0.8
 9 11 4 0.4 0.29
 9 11 4 0.42 0.29
 -9 11 -4 0.11 0.07
 -9 11 -5 0.19 0.07
 -9 -11 -5 0.33 0.6
 -9 -11 -5 -0.19 0.24
 -9 11 -6 0.07 0.06
 -9 -11 -6 0.06 0.36
 -9 -11 -6 0.64 0.29
 -9 12 5 0.17 0.08
 9 12 -5 0.23 0.09
 -9 12 5 0.43 0.16
 9 12 -4 0.63 0.11
 -9 12 4 0.48 0.19
 -9 12 4 0.65 0.11
 -9 12 3 0.05 0.15
 9 12 -3 -0.03 0.06
 -9 12 3 -0.11 0.07
 -9 12 2 -0.02 0.07
 -9 12 2 -0.08 0.18
 9 12 -2 -0.23 0.08
 -9 12 1 -0.14 0.07
 9 12 -1 0.07 0.21
 -9 12 1 -0.08 0.19
 9 12 0 0.49 1.04
 -9 12 0 -0.06 0.06
 9 12 0 0.29 0.3
 -9 12 0 0.12 0.19
 -9 12 -1 0.83 0.24
 9 12 1 0.24 0.27
 9 12 1 0.72 1.02
 -9 12 -1 0.46 0.09
 9 12 2 -0.04 0.9
 -9 12 -2 0.05 0.05
 9 12 2 -0.31 0.25
 -9 12 -3 0.05 0.05
 9 12 3 0.15 0.31
 -9 12 -4 0 0.05
 9 12 4 0.16 0.3
 9 13 -3 0.12 0.08
 -9 13 3 0.05 0.14
 -9 13 3 0.18 0.07
 -9 13 2 0.06 0.06
 9 13 -2 0.16 0.08
 -9 13 2 0.15 0.15
 9 13 -1 0.36 0.08
 -9 13 1 0.32 0.17
 -9 13 1 0.44 0.07
 9 13 0 0.7 0.19
 -9 13 0 0.41 0.18
 -9 13 0 0.57 0.08
 9 13 1 0.74 0.21
 9 13 2 0.66 0.21
 -10 0 10 0.29 0.11
 10 0 -9 -0.01 0.08
 -10 0 9 -0.08 0.14
 -10 0 9 0.13 0.09
 -10 0 8 12.77 0.65
 10 0 -8 12.37 0.76
 10 0 -7 -0.22 0.13
 -10 0 7 -0.02 0.14
 -10 0 6 0.74 0.19
 10 0 -6 0.97 0.17
 10 0 -6 0.77 0.25
 10 0 -6 1.2 0.24
 10 0 -5 -0.05 0.2
 -10 0 5 0.41 0.34
 -10 0 4 10.02 1.09
 -10 0 4 11.53 1.01
 -10 0 3 -0.09 0.2
 -10 0 3 -0.15 0.27
 -10 0 2 0.09 0.21
 -10 0 2 0.04 0.2
 10 0 -2 0.34 0.3
 -10 0 2 0.53 0.32
 10 0 -1 0.05 0.31
 -10 0 1 -0.06 0.16
 -10 0 1 -0.27 0.19
 10 0 -1 -0.08 0.21
 -10 0 1 0.01 0.18
 -10 0 0 4.04 0.47
 10 0 0 3.82 0.64
 -10 0 0 4.82 0.72
 10 0 0 4.92 0.59
 10 0 1 0.24 0.27
 10 0 1 -0.05 0.17
 -10 0 -1 0.1 0.17
 -10 0 -1 0.03 0.2
 10 0 2 36.06 2.42
 -10 0 -2 39.81 2.77
 -10 0 -3 -0.04 0.37
 10 0 3 0.02 0.22
 -10 0 -4 11.89 1.44
 -10 0 -5 0.14 0.54
 -10 0 -5 0.1 0.27
 -10 0 -5 0.18 0.15
 10 0 6 15.55 0.99
 10 0 6 17.72 0.92
 -10 0 -6 16.68 1.17
 -10 0 -6 16.96 0.92
 10 0 7 0.22 0.16
 -10 0 -7 -0.01 0.08
 -10 0 -7 0.43 0.3
 10 0 7 -0.11 0.17
 10 0 8 9.92 0.59
 10 0 8 10.15 0.68
 10 0 9 -0.1 0.12
 10 0 9 -0.06 0.1
 10 0 9 0.21 0.18
 10 0 10 0.73 0.11
 10 0 10 0.76 0.18
 -10 1 10 0.1 0.07
 -10 -1 10 0.1 0.07
 -10 -1 10 -0.02 0.1
 -10 1 9 0.23 0.13
 -10 1 9 0.07 0.07
 10 -1 -9 0.18 0.13
 -10 -1 9 0.37 0.18
 -10 -1 9 0.14 0.1
 10 1 -8 2.27 0.26
 -10 1 8 3.56 0.39
 10 -1 -8 3.13 0.35
 -10 -1 8 3.19 0.31
 10 1 -7 -0.1 0.12
 -10 1 7 -0.07 0.11
 10 -1 -7 0.05 0.12
 -10 -1 7 -0.16 0.13
 10 -1 -7 0.04 0.12
 -10 1 6 0.42 0.16
 10 1 -6 0.61 0.2
 -10 -1 6 0.68 0.2
 10 -1 -6 0.27 0.17
 10 -1 -6 0.23 0.17
 10 -1 -6 0.49 0.22
 -10 -1 6 0.63 0.19
 -10 1 5 0.66 0.33
 10 1 -5 0.8 0.19
 -10 1 5 1.44 0.47
 -10 -1 5 0.82 0.33
 -10 1 4 0.67 0.32
 -10 1 4 0.81 0.3
 -10 -1 4 1.22 0.42
 -10 -1 4 0.66 0.32
 -10 1 3 6.94 0.73
 -10 1 3 7.09 0.82
 -10 1 3 5.97 0.85
 -10 -1 3 6.01 0.79
 10 -1 -3 4.05 1.01
 -10 -1 3 6.47 0.67
 -10 1 2 7.38 0.83
 -10 1 2 8.12 0.96
 -10 1 2 7.39 0.71
 -10 -1 2 7.57 0.91
 -10 -1 2 8.4 0.91
 -10 -1 2 7.21 0.68
 10 -1 -2 4.25 0.98
 -10 1 1 58.82 3.28
 10 1 -1 66.86 3.7
 -10 1 1 62.62 3.05
 -10 1 1 65.24 4.06
 -10 -1 1 65.15 4.03
 10 -1 -1 56.78 3.92
 10 1 0 1.3 0.37
 10 1 0 1.61 0.3
 -10 1 0 1.26 0.43
 -10 1 0 1.74 0.32
 10 -1 0 1.69 0.4
 -10 -1 0 1.6 0.42
 10 -1 0 1.37 0.51
 -10 1 -1 0.66 0.21
 10 1 1 0.57 0.22
 -10 1 -1 1.02 0.42
 10 1 1 0.91 0.32
 10 -1 1 0.9 0.34
 -10 -1 -1 1.16 0.46
 10 -1 1 0.38 0.26
 -10 1 -2 2.29 0.53
 10 1 2 2.24 0.42
 -10 1 -2 1.87 0.33
 10 1 2 2.01 0.48
 10 -1 2 2.1 0.43
 -10 -1 -2 2.92 0.72
 10 1 3 0.97 0.37
 -10 1 -3 1.26 0.44
 -10 -1 -3 0.62 0.51
 10 -1 3 1.15 0.37
 -10 1 -4 3.77 0.78
 -10 -1 -4 4.14 0.99
 -10 1 -5 0.39 0.23
 -10 1 -5 0.04 0.1
 10 1 5 -0.06 0.17
 -10 -1 -5 0.02 0.18
 -10 -1 -5 0.35 0.18
 -10 -1 -5 0.12 0.56
 -10 1 -6 0.63 0.14
 -10 1 -6 0.27 0.32
 10 1 6 0.22 0.21
 10 1 6 0.63 0.18
 10 -1 6 0.93 0.25
 -10 -1 -6 0.49 0.23
 -10 -1 -6 0.75 0.21
 10 1 7 0.04 0.18
 10 1 7 0.02 0.13
 -10 -1 -7 0.06 0.13
 10 -1 7 0.01 0.17
 10 -1 7 -0.42 0.21
 -10 -1 -7 0.02 0.27
 10 1 8 0.22 0.14
 10 1 8 0.08 0.2
 10 1 8 0.38 0.15
 -10 -1 -8 0.14 0.11
 10 -1 8 0.12 0.15
 -10 -1 -8 0.62 0.31
 10 -1 8 0.33 0.16
 10 1 9 0.16 0.17
 10 1 9 0.16 0.1
 10 -1 9 0.24 0.12
 10 -1 9 0.17 0.14
 10 1 10 0.12 0.12
 10 -1 10 0.09 0.15
 10 -1 10 0.15 0.1
 -10 -2 10 0.33 0.11
 10 -2 -10 0.24 0.08
 -10 -2 10 0.31 0.13
 -10 2 9 0.72 0.14
 -10 -2 9 0.67 0.15
 10 -2 -9 0.72 0.17
 -10 2 8 2.07 0.28
 10 -2 -8 2.14 0.32
 -10 -2 8 2.29 0.28
 10 2 -7 1.57 0.21
 10 -2 -7 1.36 0.23
 10 -2 -7 0.96 0.31
 -10 -2 7 1.31 0.25
 10 2 -6 0.95 0.19
 10 -2 -6 1.37 0.25
 -10 -2 6 1.15 0.22
 10 -2 -6 1.69 0.3
 10 2 -5 -0.23 0.13
 -10 2 5 -0.15 0.27
 -10 2 4 3 0.57
 -10 2 4 2.33 0.48
 -10 -2 4 2.87 0.55
 -10 2 3 12.1 1.19
 -10 2 3 12.2 0.96
 -10 2 3 11.5 1.13
 -10 -2 3 10.35 1.07
 -10 2 2 -0.32 0.23
 -10 2 2 0.2 0.17
 -10 2 2 0.21 0.33
 -10 -2 2 -0.18 0.24
 10 -2 -2 0.53 0.8
 -10 2 1 0.5 0.33
 -10 2 1 0.37 0.34
 -10 2 1 0.91 0.26
 -10 -2 1 0.95 0.34
 10 -2 -1 0.69 0.86
 -10 2 0 0.02 0.2
 -10 2 0 0.01 0.13
 10 -2 0 0.22 0.61
 10 -2 0 -0.14 0.35
 -10 -2 0 0.08 0.34
 -10 2 -1 0.04 0.27
 -10 2 -1 0.22 0.18
 10 -2 1 0.09 0.25
 10 -2 1 0.38 0.56
 -10 -2 -1 0.1 0.33
 -10 2 -2 5.37 0.82
 -10 2 -2 5.73 0.64
 10 -2 2 5.43 0.68
 -10 -2 -2 3.8 0.83
 -10 2 -3 5.7 0.89
 -10 2 -3 4.8 0.61
 -10 -2 -3 5.51 1.1
 -10 2 -4 2.53 0.69
 -10 -2 -4 3.6 0.57
 -10 -2 -4 1.5 1.22
 10 -2 4 2.16 0.5
 -10 2 -5 6.89 0.7
 10 2 5 7.16 0.63
 10 2 5 6.95 0.46
 -10 -2 -5 6.77 0.51
 -10 -2 -5 6.11 0.71
 -10 -2 -5 6.46 0.59
 10 2 6 0.01 0.12
 10 2 6 -0.03 0.14
 10 2 6 0.15 0.17
 -10 2 -6 0.2 0.28
 -10 -2 -6 -0.19 0.15
 -10 -2 -6 0.08 0.27
 -10 -2 -6 0.07 0.12
 10 2 7 8.55 0.58
 10 2 7 8.57 0.49
 10 2 7 8.2 0.64
 -10 -2 -7 7.93 0.58
 10 -2 7 7.6 0.55
 -10 -2 -7 8.37 0.76
 10 2 8 0.3 0.13
 10 2 8 0.11 0.17
 10 -2 8 -0.03 0.18
 -10 -2 -8 0.15 0.14
 -10 -2 -8 0.29 0.26
 10 -2 8 0.12 0.15
 10 2 9 2.97 0.2
 10 2 9 2.92 0.31
 10 -2 9 2.99 0.34
 10 -2 9 2.81 0.29
 10 2 10 0.83 0.13
 10 -2 10 0.69 0.11
 10 -2 10 0.51 0.12
 -10 -3 10 1.45 0.18
 10 -3 -10 1.07 0.14
 -10 3 9 0.21 0.07
 -10 -3 9 -0.08 0.13
 10 -3 -9 -0.12 0.11
 -10 3 8 0.38 0.12
 10 -3 -8 0.13 0.13
 -10 -3 8 0.38 0.19
 10 -3 -8 0.24 0.19
 -10 3 7 0.12 0.11
 10 -3 -7 0.22 0.17
 -10 -3 7 0.34 0.2
 10 -3 -7 0.48 0.19
 -10 -3 7 0.21 0.19
 10 3 -6 13 0.67
 10 -3 -6 12.66 0.82
 -10 -3 6 12.57 0.78
 10 -3 -6 11.91 0.73
 10 3 -5 5.62 0.41
 -10 3 5 4.48 0.75
 10 -3 -5 5.58 0.5
 -10 3 4 -0.27 0.19
 10 3 -4 0.28 0.15
 -10 3 4 0.58 0.38
 -10 3 3 0.16 0.26
 -10 3 3 0.37 0.31
 -10 3 3 0.29 0.37
 -10 3 2 2.24 0.49
 -10 3 2 2.36 0.42
 -10 3 2 2.97 0.6
 10 -3 -2 0.9 0.64
 -10 3 1 25.12 2.04
 -10 3 1 23.77 1.59
 -10 3 1 23.53 1.51
 -10 -3 1 30.98 2.08
 -10 3 0 0.77 0.37
 -10 3 0 1.16 0.3
 -10 -3 0 0.55 0.46
 10 -3 0 0.32 0.6
 -10 3 -1 0.19 0.19
 -10 3 -1 0.25 0.36
 -10 -3 -1 0.15 0.37
 10 -3 1 -0.09 0.54
 -10 3 -2 -0.27 0.14
 -10 3 -2 0.1 0.24
 -10 -3 -2 -0.24 0.38
 10 -3 2 0.01 0.39
 -10 3 -3 1.6 0.55
 -10 3 -3 2.22 0.46
 -10 -3 -3 1.47 0.96
 10 3 4 3.78 0.42
 -10 3 -4 3.5 0.75
 -10 3 -4 3.21 0.5
 -10 -3 -4 2.73 0.56
 10 -3 4 3.58 0.59
 -10 -3 -4 2.98 1.43
 10 3 5 0.5 0.18
 10 3 5 0.68 0.19
 -10 3 -5 1.13 0.35
 -10 -3 -5 0.43 0.33
 -10 -3 -5 0.03 0.45
 -10 -3 -5 0.7 0.23
 10 3 6 -0.09 0.14
 10 3 6 0.22 0.16
 -10 -3 -6 0.34 0.49
 -10 -3 -6 0.01 0.3
 -10 -3 -6 0.19 0.19
 10 3 7 0.7 0.18
 10 3 7 0.73 0.19
 10 -3 7 0.82 0.26
 -10 -3 -7 0.91 0.28
 -10 -3 -7 0.62 0.22
 10 3 8 0.74 0.13
 10 3 8 0.96 0.21
 -10 -3 -8 0.65 0.29
 -10 -3 -8 0.8 0.19
 10 -3 8 0.52 0.2
 10 3 9 1.57 0.21
 10 -3 9 2.67 0.31
 -10 -3 -9 1.84 0.2
 10 -3 9 2.42 0.25
 10 -3 10 1.42 0.18
 10 -3 10 1.64 0.16
 10 -4 -10 1.16 0.15
 10 -4 -9 0 0.12
 -10 -4 9 0.26 0.12
 -10 -4 8 0.47 0.21
 10 -4 -8 0.66 0.15
 10 -4 -8 0.33 0.17
 -10 4 7 1.89 0.2
 -10 -4 7 2.34 0.33
 -10 -4 7 2.06 0.3
 10 -4 -7 1.56 0.3
 10 -4 -7 2.33 0.29
 -10 4 6 14.69 1.43
 -10 4 6 13.28 0.72
 10 -4 -6 13.77 0.92
 -10 -4 6 13.65 0.84
 10 -4 -6 13.86 0.81
 -10 4 5 -0.18 0.31
 -10 4 5 0.79 0.16
 10 -4 -5 1.04 0.28
 -10 4 4 19.49 1.75
 10 4 -4 16.41 0.83
 -10 4 4 17.66 1.36
 -10 4 3 17.26 1.26
 -10 4 3 17.08 1.59
 -10 4 3 16.31 1.31
 -10 4 2 4.65 0.66
 -10 4 2 3.5 0.71
 -10 4 2 2.91 0.5
 -10 4 1 4.93 0.63
 -10 4 1 3.91 0.76
 -10 4 1 4.42 0.67
 -10 -4 1 5.4 0.82
 -10 4 0 5.35 0.89
 10 4 0 5.94 0.83
 -10 4 0 5.58 0.69
 -10 -4 0 4.07 0.81
 -10 4 -1 4.44 0.62
 -10 4 -1 3.11 0.69
 -10 -4 -1 2.81 0.68
 10 -4 1 1.22 0.78
 -10 4 -2 1.68 0.58
 -10 4 -2 1.86 0.44
 10 -4 2 1.41 0.63
 -10 -4 -2 0.8 0.47
 -10 4 -3 0.7 0.49
 10 4 3 0.81 0.2
 -10 4 -3 0.43 0.28
 -10 -4 -3 0.46 0.55
 -10 4 -4 0.19 0.29
 10 4 4 0.11 0.16
 -10 4 -4 0.79 0.13
 -10 -4 -4 0.35 0.35
 10 4 5 3.78 0.39
 10 4 5 3.65 0.31
 -10 4 -5 2.92 0.51
 -10 4 -5 3.68 0.33
 -10 -4 -5 2.5 0.66
 -10 -4 -5 3.03 0.38
 10 4 6 0.12 0.15
 10 4 6 0.15 0.11
 -10 -4 -6 -0.07 0.28
 -10 -4 -6 0.61 0.74
 -10 -4 -6 0.03 0.21
 10 4 7 7.19 0.52
 -10 -4 -7 6.87 0.52
 -10 -4 -7 7.38 0.64
 -10 -4 -7 7.1 0.77
 10 4 8 0.23 0.12
 -10 -4 -8 0.12 0.14
 10 -4 8 0.07 0.17
 -10 -4 -8 0.07 0.24
 10 4 9 1.19 0.11
 -10 -4 -9 1.61 0.3
 10 -4 9 1.98 0.23
 -10 -4 -9 1.9 0.21
 -10 -5 9 0.03 0.11
 10 -5 -9 -0.01 0.13
 -10 5 8 0.37 0.28
 -10 -5 8 -0.07 0.16
 10 -5 -8 0.11 0.13
 -10 5 7 5.44 0.81
 10 -5 -7 7.19 0.58
 -10 -5 7 7.45 0.55
 10 -5 -7 6.28 0.48
 -10 5 6 0.11 0.32
 10 -5 -6 -0.16 0.18
 -10 5 5 8.11 1.04
 -10 5 4 1.24 0.4
 -10 5 3 1.15 0.44
 -10 5 3 1.26 0.6
 -10 5 3 1.52 0.5
 -10 5 2 3.01 0.59
 -10 5 2 2.29 0.67
 -10 5 2 2.29 0.46
 -10 5 1 1.83 0.59
 -10 5 1 1.94 0.45
 -10 5 1 1.26 0.35
 10 5 -1 1.32 0.48
 -10 5 0 1.68 0.4
 -10 5 0 1.13 0.47
 10 5 0 1.6 0.62
 -10 -5 0 1.63 0.55
 -10 5 -1 6.13 0.99
 -10 5 -1 7.24 0.8
 -10 -5 -1 2.94 0.81
 -10 5 -2 0.07 0.22
 -10 5 -2 0.69 0.5
 10 5 2 0.22 0.14
 -10 5 -2 0.31 0.26
 -10 -5 -2 0.18 0.47
 -10 5 -3 1.76 0.22
 -10 5 -3 1.48 0.65
 10 5 3 1.24 0.2
 -10 5 -3 1.1 0.33
 -10 5 -4 2.9 0.29
 -10 5 -4 3.81 0.51
 10 5 4 3.03 0.32
 -10 -5 -4 2.84 0.34
 -10 -5 -4 2.25 0.65
 -10 5 -5 1.99 0.25
 10 5 5 1.44 0.24
 -10 -5 -5 1.73 0.62
 -10 -5 -5 1.63 0.3
 -10 5 -6 1.98 0.26
 10 5 6 1.9 0.23
 -10 -5 -6 1.44 0.39
 -10 -5 -6 2.85 0.94
 -10 5 -7 7.71 0.5
 10 5 7 8.18 0.49
 -10 -5 -7 8.7 0.66
 -10 -5 -7 8.16 0.64
 -10 -5 -7 9.3 0.93
 -10 -5 -8 1.04 0.28
 -10 -5 -8 1.08 0.23
 -10 -5 -9 0.04 0.18
 -10 -5 -9 0.19 0.1
 10 -5 9 0.13 0.12
 10 -6 -9 0.15 0.17
 -10 -6 9 0.05 0.1
 -10 6 8 0.56 0.41
 -10 -6 8 0.5 0.18
 10 -6 -8 0.69 0.17
 -10 6 7 -0.28 0.35
 10 -6 -7 0.57 0.18
 -10 6 6 3.18 0.68
 10 -6 -6 3.27 0.39
 -10 6 5 4.85 0.77
 -10 6 4 1.62 0.51
 10 6 -4 1.89 0.2
 -10 6 3 13.03 1.29
 10 6 -3 14.07 0.68
 -10 6 3 12.74 0.68
 -10 6 2 13.98 1.19
 -10 6 2 12.51 0.65
 10 6 -2 12.36 0.68
 -10 6 1 17.78 0.87
 -10 6 1 18.73 1.44
 10 6 -1 17.99 1.57
 -10 6 1 17.9 1.39
 -10 6 1 17.7 1.78
 -10 6 1 22.84 1.21
 -10 6 0 7.2 1.11
 10 6 0 8.39 1.03
 -10 6 0 7.14 0.41
 -10 6 0 7.89 0.9
 -10 6 0 6.62 0.6
 -10 -6 0 4.34 1
 -10 6 -1 0.06 0.1
 -10 6 -1 0.05 0.17
 -10 6 -1 0.17 0.37
 -10 6 -1 -0.14 0.42
 -10 -6 -1 -0.17 0.49
 -10 6 -2 0.01 0.1
 -10 6 -2 -0.12 0.15
 -10 6 -3 5.04 0.61
 -10 6 -3 5.22 0.36
 10 6 3 4.82 0.29
 -10 6 -4 8.77 0.78
 -10 6 -4 8.93 0.51
 10 6 4 9.33 0.48
 -10 -6 -4 8.01 0.95
 -10 -6 -4 9.83 0.65
 10 6 5 0.69 0.1
 -10 6 -5 0.91 0.17
 -10 -6 -5 0.83 0.74
 -10 -6 -5 0.7 0.24
 -10 6 -6 17.15 0.85
 -10 -6 -6 17.53 1.57
 -10 -6 -6 17.48 0.98
 -10 6 -7 1.77 0.22
 -10 -6 -7 1.87 0.35
 -10 -6 -7 2.33 0.55
 -10 6 -8 0.27 0.14
 -10 -6 -8 0.54 0.19
 -10 -6 -8 0.22 0.2
 10 -6 9 2.61 0.25
 -10 -6 -9 2.25 0.24
 -10 -7 9 0.06 0.12
 10 -7 -8 1.74 0.21
 -10 -7 8 2.09 0.27
 -10 7 7 4.33 0.67
 10 -7 -7 4.1 0.39
 -10 7 6 0.45 0.39
 10 7 -6 0.37 0.15
 10 -7 -6 0.67 0.22
 -10 7 5 0.09 0.32
 10 7 -5 -0.08 0.09
 10 7 -4 0.98 0.18
 -10 7 4 1.39 0.2
 -10 7 4 0.97 0.4
 10 7 -3 14.05 0.73
 -10 7 3 15.11 1.28
 -10 7 3 14.27 0.73
 10 7 -2 0.57 0.21
 -10 7 2 0.29 0.12
 -10 7 2 0.88 0.25
 -10 7 2 -0.23 0.32
 -10 7 1 2.12 0.44
 10 7 -1 2.15 0.92
 -10 7 1 1.95 0.24
 10 7 -1 2.38 0.31
 10 7 0 0.59 0.79
 10 7 0 -0.04 0.23
 -10 7 0 0.18 0.1
 -10 7 0 0.13 0.23
 -10 7 -1 3.72 0.32
 10 7 1 4.09 0.44
 -10 7 -1 4.04 0.52
 10 7 1 4.24 0.44
 -10 7 -2 6.69 0.42
 -10 7 -2 7.12 0.72
 -10 7 -3 5 0.35
 -10 7 -3 5.14 0.6
 -10 7 -4 1.13 0.18
 -10 -7 -4 1.35 0.3
 -10 7 -5 0.54 0.14
 -10 -7 -5 0.03 0.73
 -10 -7 -5 0.53 0.23
 -10 7 -6 3.56 0.31
 -10 -7 -6 2.6 0.39
 -10 -7 -6 2.06 0.97
 -10 7 -7 1.04 0.18
 -10 -7 -7 1.21 0.38
 -10 -7 -7 1.38 0.64
 -10 7 -8 0.44 0.13
 -10 -7 -8 0.3 0.2
 -10 -7 -8 0.13 0.16
 10 8 -8 0.42 0.12
 -10 -8 8 0.43 0.16
 10 -8 -8 0.36 0.12
 -10 8 7 0.02 0.31
 10 8 -7 -0.02 0.09
 10 -8 -7 -0.19 0.12
 -10 8 6 1.05 0.46
 10 8 -6 1.44 0.21
 10 -8 -6 1.27 0.25
 -10 8 5 2.82 0.3
 -10 8 5 1.47 0.53
 10 8 -5 3.13 0.31
 -10 8 4 -0.33 0.3
 10 8 -4 0.12 0.11
 -10 8 4 0.06 0.11
 -10 8 3 7.38 0.45
 -10 8 3 6.91 0.73
 -10 8 3 8.22 1.02
 10 8 -3 6.56 0.44
 -10 8 2 0.02 0.15
 -10 8 2 -0.1 0.34
 10 8 -2 -0.12 0.2
 -10 8 2 -0.11 0.09
 10 8 -1 0.94 0.95
 10 8 -1 -0.23 0.22
 -10 8 1 0.08 0.12
 -10 8 1 0.12 0.27
 -10 8 0 1.01 0.16
 10 8 0 1.09 0.97
 -10 8 0 1.17 0.35
 10 8 0 0.92 0.31
 10 8 1 2.9 0.41
 10 8 1 2.41 0.39
 -10 8 -1 2.8 0.26
 10 8 1 3.71 1.08
 -10 8 -1 3.37 0.5
 10 8 2 0.11 0.31
 -10 8 -2 0.13 0.22
 -10 8 -2 0.04 0.08
 10 8 2 -0.01 0.31
 -10 8 -3 0.56 0.15
 -10 8 -3 0.44 0.29
 -10 8 -4 1.81 0.22
 -10 8 -5 0.46 0.12
 -10 -8 -5 0.63 0.28
 -10 -8 -5 -0.58 0.71
 -10 8 -6 0.54 0.12
 -10 -8 -6 1.23 0.83
 -10 -8 -6 1.04 0.32
 -10 8 -7 4.21 0.29
 -10 -8 -7 3.61 0.61
 -10 -8 -7 3.84 0.4
 -10 8 -8 1.08 0.14
 -10 -8 -8 1.14 0.23
 10 9 -7 1.25 0.17
 10 -9 -7 0.99 0.19
 -10 9 6 0.35 0.4
 10 9 -6 0.91 0.16
 10 -9 -6 0.79 0.21
 -10 9 5 0.25 0.13
 10 9 -5 0.32 0.12
 -10 9 5 -0.11 0.31
 -10 9 4 0.55 0.38
 -10 9 4 0.23 0.12
 10 9 -4 0.28 0.13
 -10 9 3 2.23 0.58
 -10 9 3 3.05 0.46
 10 9 -3 2.65 0.28
 -10 9 3 2.89 0.29
 10 9 -2 2.5 0.32
 -10 9 2 1.27 0.53
 -10 9 2 2.5 0.26
 -10 9 2 3.2 0.48
 10 9 -1 1.07 1.09
 10 9 -1 0.35 0.27
 -10 9 1 0.11 0.11
 -10 9 1 0.21 0.19
 10 9 0 1.55 1.11
 -10 9 0 2.22 0.45
 -10 9 0 2.59 0.26
 10 9 0 2.84 0.39
 -10 9 -1 0.18 0.25
 10 9 1 -0.07 0.29
 10 9 1 0.91 1.02
 -10 9 -1 -0.01 0.09
 10 9 1 0.05 0.3
 -10 9 -2 1.76 0.39
 10 9 2 1.47 0.37
 10 9 2 2.04 0.83
 10 9 2 2.3 0.4
 -10 9 -2 2.3 0.23
 -10 9 -3 -0.06 0.07
 -10 9 -3 0.14 0.26
 10 9 3 0.01 0.31
 -10 9 -4 0.89 0.15
 -10 9 -5 4.42 0.31
 -10 -9 -5 5.06 0.48
 -10 -9 -5 3.96 0.88
 -10 9 -6 0.01 0.08
 -10 -9 -6 0.14 0.64
 -10 -9 -6 0.27 0.3
 -10 9 -7 2.22 0.2
 -10 -9 -7 2.52 0.32
 -10 -9 -7 2 0.37
 10 10 -7 -0.09 0.06
 10 -10 -7 -0.04 0.11
 -10 10 6 1.91 0.21
 10 10 -6 1.98 0.21
 10 -10 -6 2.25 0.26
 -10 10 5 1.2 0.45
 -10 10 5 2.01 0.22
 -10 10 5 1.43 0.29
 10 10 -5 1.77 0.2
 10 10 -4 0.96 0.16
 -10 10 4 1 0.28
 -10 10 4 0.79 0.4
 -10 10 4 1.22 0.18
 10 10 -3 4.38 0.31
 -10 10 3 4.08 0.51
 -10 10 3 4.62 0.32
 -10 10 3 4.91 0.77
 -10 10 2 3.65 0.3
 10 10 -2 3.45 0.36
 -10 10 2 3.12 0.47
 -10 10 1 5.4 0.36
 10 10 -1 5.36 1.31
 -10 10 1 5.19 0.61
 10 10 -1 5.23 0.46
 10 10 0 0.31 1.09
 10 10 0 0.27 0.29
 -10 10 0 0.68 0.14
 -10 10 0 0.18 0.23
 -10 10 -1 -0.04 0.2
 10 10 1 0.63 1.04
 -10 10 -1 -0.11 0.08
 10 10 1 -0.12 0.29
 -10 10 -2 -0.03 0.21
 10 10 2 1.29 1.01
 -10 10 -2 -0.06 0.07
 10 10 2 -0.03 0.31
 10 10 2 -0.09 0.31
 10 10 3 2.24 0.95
 -10 10 -3 1.9 0.2
 10 10 3 2.08 0.39
 10 10 3 2.29 0.39
 -10 10 -4 0.05 0.07
 -10 10 -5 2.43 0.21
 -10 -10 -5 2.43 0.54
 -10 -10 -5 2.28 0.37
 -10 10 -6 0.74 0.11
 -10 -10 -6 0.97 0.4
 -10 -10 -6 0.79 0.28
 10 11 -5 0.05 0.09
 -10 11 5 0.05 0.1
 -10 11 5 -0.01 0.07
 10 11 -4 0.12 0.08
 -10 11 4 0.02 0.09
 -10 11 4 0 0.18
 -10 11 3 0 0.39
 10 11 -3 -0.05 0.07
 -10 11 3 0.13 0.17
 -10 11 3 -0.02 0.07
 10 11 -2 0.05 0.09
 -10 11 2 0.09 0.21
 -10 11 2 0.02 0.08
 -10 11 1 -0.04 0.08
 -10 11 1 0 0.19
 10 11 -1 -0.14 0.22
 10 11 0 -1.02 1.03
 -10 11 0 0.28 0.2
 10 11 0 -0.22 0.26
 -10 11 0 0.27 0.09
 -10 11 -1 -0.08 0.07
 10 11 1 -0.26 0.28
 10 11 1 -0.37 1.03
 -10 11 -1 0.08 0.18
 10 11 2 0.05 0.35
 -10 11 -2 -0.03 0.2
 -10 11 -2 0.09 0.09
 10 11 2 0.04 0.95
 10 11 3 -0.01 0.29
 -10 11 -3 -0.06 0.06
 10 11 3 -0.8 0.85
 -10 11 -4 0.01 0.06
 10 11 4 0 0.27
 -10 11 -5 0.06 0.05
 -10 -11 -5 -0.32 0.24
 10 12 -4 -0.01 0.08
 -10 12 4 0.06 0.08
 -10 12 4 0.06 0.13
 10 12 -3 0.02 0.08
 -10 12 3 -0.04 0.08
 -10 12 3 -0.03 0.15
 -10 12 2 0.29 0.08
 -10 12 2 0.35 0.2
 10 12 -2 0.1 0.1
 -10 12 1 -0.11 0.16
 -10 12 1 0.08 0.07
 10 12 -1 -0.3 0.12
 -10 12 0 0.11 0.07
 -10 12 0 -0.09 0.17
 10 12 0 0.35 0.21
 10 12 1 0.21 0.25
 10 12 1 -0.61 0.62
 -10 12 -1 -0.09 0.18
 -10 12 -1 0.27 0.07
 10 12 2 0.13 0.31
 -10 12 -2 0.06 0.07
 -10 12 -3 0.08 0.05
 10 12 3 0.4 0.3
 10 12 4 0.86 0.23
 -10 -12 -4 0.5 0.28
 10 13 -1 0.07 0.06
 -10 13 1 0.03 0.05
 -10 13 1 0.08 0.14
 10 13 0 1.48 0.16
 -10 13 0 1.27 0.1
 -11 0 10 0.54 0.11
 -11 0 9 0.21 0.13
 11 0 -9 0.03 0.06
 -11 0 9 0.23 0.11
 11 0 -8 0.39 0.14
 -11 0 8 0.38 0.12
 11 0 -7 -0.06 0.13
 -11 0 7 -0.11 0.13
 11 0 -6 3.23 0.38
 11 0 -6 2.65 0.31
 -11 0 6 3.94 0.34
 11 0 -5 -0.04 0.13
 11 0 -5 -0.08 0.11
 -11 0 5 0.11 0.14
 -11 0 5 -0.03 0.13
 -11 0 4 0.46 0.34
 -11 0 4 0.29 0.26
 -11 0 3 -0.12 0.29
 -11 0 3 0.18 0.21
 11 0 -2 7.06 0.74
 -11 0 2 7.79 1
 -11 0 2 6.06 0.69
 -11 0 2 7.04 0.84
 -11 0 1 0.19 0.32
 -11 0 1 0.1 0.29
 -11 0 1 0.04 0.2
 11 0 -1 -0.12 0.19
 -11 0 0 14.47 1.13
 11 0 0 13.87 1.13
 -11 0 0 14.58 1.36
 11 0 1 -0.11 0.2
 -11 0 -1 0.09 0.34
 -11 0 -2 39.29 2.78
 11 0 2 33.99 2.37
 -11 0 -3 0.32 0.31
 -11 0 -4 0.12 0.12
 -11 0 -4 0.38 0.28
 -11 0 -4 0.33 0.47
 -11 0 -5 0.06 0.2
 11 0 5 -0.1 0.17
 -11 0 -5 0.04 0.13
 11 0 5 -0.15 0.17
 -11 0 -6 0.16 0.14
 -11 0 -6 0.56 0.29
 11 0 6 0.2 0.18
 11 0 6 0.47 0.19
 11 0 7 0.04 0.14
 -11 0 -7 0.03 0.26
 11 0 7 -0.1 0.18
 11 0 8 22.22 1.08
 11 0 8 22.77 1.2
 11 0 9 0.06 0.1
 11 0 9 -0.11 0.15
 11 0 9 -0.02 0.08
 11 0 10 9.03 0.52
 -11 1 10 0.21 0.08
 -11 -1 10 0.2 0.12
 -11 1 9 0.1 0.1
 11 -1 -9 0.1 0.1
 -11 -1 9 0.01 0.14
 11 1 -8 11.97 0.63
 -11 1 8 11.56 0.72
 -11 -1 8 11.43 0.62
 11 -1 -8 10.7 0.71
 11 1 -7 0.52 0.17
 11 -1 -7 0.55 0.22
 -11 -1 7 0.51 0.15
 11 1 -6 5.32 0.47
 -11 1 6 4.34 0.33
 11 -1 -6 5.07 0.38
 -11 -1 6 5.44 0.43
 -11 -1 6 4.72 0.41
 11 -1 -6 5.57 0.48
 11 -1 -6 3.76 0.47
 -11 1 5 0.98 0.19
 -11 1 5 0.98 0.4
 11 1 -5 0.63 0.22
 11 1 -5 0.74 0.2
 11 -1 -5 0.96 0.21
 -11 -1 5 0.58 0.2
 -11 1 4 0.75 0.37
 -11 1 4 1.32 0.38
 -11 -1 4 0.9 0.36
 -11 -1 4 0.26 0.34
 -11 1 3 21.88 1.56
 -11 1 3 22.31 1.46
 11 -1 -3 25.56 1.9
 -11 -1 3 20.99 1.56
 -11 1 2 2.88 0.55
 -11 1 2 3.02 0.6
 -11 1 2 2.12 0.44
 11 -1 -2 1.46 0.67
 -11 -1 2 1.96 0.46
 -11 -1 2 1.47 0.48
 -11 1 1 0.1 0.14
 -11 1 1 0.08 0.23
 -11 1 1 0.26 0.26
 11 -1 -1 0.11 0.48
 -11 -1 1 0 0.23
 -11 -1 1 0.25 0.33
 -11 1 0 10.22 1.22
 -11 1 0 10.95 0.84
 -11 1 0 10.25 1.01
 -11 -1 0 10.99 1.17
 11 -1 0 9.96 0.98
 -11 1 -1 14.14 1.02
 11 1 1 16.14 1.16
 -11 1 -1 14.25 1.4
 11 -1 1 14.73 1.22
 -11 -1 -1 14.49 1.43
 11 1 2 6.58 0.74
 -11 1 -2 7.14 1.04
 -11 -1 -2 5.8 0.98
 11 -1 2 7.26 0.82
 -11 1 -3 19.63 1.82
 -11 -1 -3 20.75 1.92
 -11 1 -4 13.48 1.57
 -11 1 -4 11.76 0.96
 -11 -1 -4 16.07 1.62
 -11 -1 -4 13.56 0.95
 -11 -1 -4 13.44 0.81
 -11 1 -5 4.09 0.58
 11 1 5 4.88 0.42
 11 1 5 4.79 0.48
 11 -1 5 5.14 0.47
 -11 -1 -5 4.95 0.47
 -11 -1 -5 4.61 0.6
 -11 1 -6 5.33 0.65
 11 1 6 5.43 0.4
 11 1 6 5.94 0.52
 -11 -1 -6 5.66 0.65
 11 -1 6 4.98 0.47
 -11 -1 -6 3.99 0.42
 11 1 7 -0.05 0.21
 11 1 7 0.14 0.16
 11 1 7 0.08 0.15
 -11 1 -7 -0.32 0.24
 11 -1 7 0.01 0.14
 -11 -1 -7 0.1 0.11
 11 -1 7 0.2 0.23
 -11 -1 -7 0.08 0.28
 11 1 8 0.68 0.21
 11 1 8 0.48 0.17
 11 1 8 0.35 0.13
 -11 -1 -8 0.42 0.21
 11 -1 8 0.36 0.18
 11 -1 8 0.57 0.19
 11 1 9 -0.03 0.12
 11 1 9 0.04 0.09
 11 -1 9 0.15 0.11
 11 -1 9 0.14 0.12
 -11 -2 10 -0.09 0.09
 -11 -2 10 0.07 0.06
 -11 2 9 0.74 0.13
 -11 -2 9 0.84 0.13
 -11 -2 9 0.34 0.18
 11 -2 -9 0.88 0.17
 -11 2 8 0.19 0.11
 11 -2 -8 -0.09 0.15
 -11 -2 8 0.06 0.12
 -11 2 7 5.75 0.36
 11 2 -7 5.8 0.4
 -11 -2 7 5.73 0.47
 11 -2 -7 5.45 0.55
 11 -2 -7 6.33 0.4
 11 2 -6 13.21 0.75
 11 -2 -6 12.53 0.81
 11 -2 -6 12.59 0.71
 -11 -2 6 12.64 0.75
 -11 2 5 9.9 1.11
 11 2 -5 10.1 0.66
 11 -2 -5 10.52 0.65
 -11 -2 5 10.94 0.64
 11 -2 -5 9.85 0.75
 -11 2 4 3.41 0.64
 11 2 -4 3.25 0.35
 -11 2 4 2.96 0.54
 -11 -2 4 2.86 0.58
 -11 2 3 1.23 0.44
 -11 2 3 1.39 0.5
 -11 2 3 1.04 0.32
 -11 -2 3 1.4 0.45
 -11 2 2 7.92 0.91
 -11 2 2 9.03 1.1
 -11 2 2 8.1 0.82
 11 -2 -2 4.93 1.41
 -11 2 1 1.65 0.53
 -11 2 1 1.89 0.44
 -11 2 1 0.83 0.27
 11 -2 -1 2.04 0.88
 -11 -2 1 1.42 0.49
 -11 2 0 0.06 0.17
 -11 2 0 0.02 0.32
 11 -2 0 0.09 0.6
 -11 -2 0 -0.2 0.19
 -11 2 -1 1.04 0.45
 -11 2 -1 1.01 0.35
 -11 -2 -1 1.73 0.63
 11 -2 1 1.84 0.53
 -11 2 -2 0.28 0.28
 -11 2 -2 0.34 0.31
 -11 -2 -2 0.43 0.46
 -11 2 -3 0.17 0.22
 -11 2 -3 0.3 0.34
 -11 -2 -3 0.32 0.8
 11 2 4 1.52 0.3
 11 2 4 0.62 0.17
 -11 2 -4 0.93 0.59
 -11 2 -4 1.04 0.35
 -11 -2 -4 0.78 0.26
 -11 -2 -4 0.64 0.22
 -11 -2 -4 1.56 0.4
 -11 2 -5 0.29 0.29
 11 2 5 0.29 0.18
 11 2 5 -0.06 0.17
 11 2 5 -0.15 0.15
 -11 -2 -5 0.13 0.18
 -11 -2 -5 -0.12 0.2
 -11 -2 -5 -0.03 0.16
 11 2 6 1.12 0.29
 11 2 6 1.61 0.27
 -11 2 -6 1.32 0.32
 11 2 6 1.4 0.21
 -11 -2 -6 1.03 0.25
 11 -2 6 1.21 0.29
 -11 -2 -6 1.36 0.33
 11 2 7 0.59 0.24
 11 2 7 0.7 0.14
 11 2 7 0.55 0.17
 -11 -2 -7 0.89 0.2
 11 -2 7 0.58 0.21
 -11 -2 -7 0.51 0.27
 11 2 8 0.66 0.16
 11 2 8 0.33 0.18
 -11 -2 -8 0.69 0.16
 -11 -2 -8 0.54 0.31
 11 -2 8 0.87 0.2
 11 -2 8 0.87 0.24
 11 2 9 0.88 0.17
 11 -2 9 0.68 0.15
 11 -2 9 0.98 0.2
 -11 -3 10 0.99 0.13
 11 -3 -9 0.75 0.17
 -11 -3 9 0.33 0.12
 -11 3 8 1.93 0.2
 -11 -3 8 2.43 0.29
 11 -3 -8 2.59 0.35
 -11 3 7 7.07 0.49
 11 -3 -7 7.32 0.5
 -11 -3 7 7.75 0.53
 -11 -3 7 8.55 0.54
 -11 3 6 9.84 1.13
 11 3 -6 8.84 0.49
 11 -3 -6 8.71 0.56
 -11 -3 6 7.72 0.59
 11 -3 -6 8.08 0.62
 11 3 -5 33.77 1.6
 -11 3 5 36 2.27
 11 -3 -5 33.51 1.62
 -11 -3 5 32.87 1.61
 11 -3 -5 32.92 1.77
 -11 3 4 1.12 0.39
 11 3 -4 0.68 0.17
 -11 3 3 -0.19 0.25
 -11 3 3 0.22 0.4
 -11 3 3 0.02 0.19
 -11 3 2 1.39 0.39
 -11 3 2 1.39 0.41
 -11 3 2 1.43 0.45
 -11 3 1 0.32 0.32
 -11 3 1 0.27 0.28
 -11 3 1 0.35 0.29
 11 -3 -1 -0.81 0.98
 -11 -3 1 -0.15 0.32
 -11 3 0 1.48 0.52
 -11 3 0 1.69 0.41
 -11 -3 0 1.22 0.47
 11 -3 0 0.75 0.8
 -11 3 -1 4.31 0.79
 -11 3 -1 4.44 0.61
 11 -3 1 5.94 0.96
 -11 -3 -1 6.09 1
 -11 3 -2 2.03 0.48
 -11 3 -2 2.13 0.61
 -11 -3 -2 2.37 0.93
 -11 3 -3 13.5 1.13
 -11 3 -3 9.19 0.77
 11 3 3 9.59 0.64
 -11 3 -3 9.73 1.29
 -11 -3 -3 8.1 1.44
 11 3 4 2.41 0.25
 11 3 4 2.85 0.37
 -11 3 -4 2.51 0.47
 -11 -3 -4 2.91 0.38
 -11 -3 -4 2.79 0.61
 11 3 5 6.8 0.55
 11 3 5 7.23 0.42
 11 3 5 7.08 0.51
 -11 3 -5 7.79 0.77
 -11 -3 -5 6.66 0.79
 -11 -3 -5 7.31 0.66
 -11 -3 -5 7.36 0.58
 11 3 6 2.41 0.33
 -11 3 -6 2.79 0.47
 11 3 6 1.95 0.27
 -11 -3 -6 2.42 0.43
 -11 -3 -6 1.63 0.27
 -11 -3 -6 1.66 0.29
 11 3 7 0.8 0.21
 11 3 7 0.72 0.16
 -11 -3 -7 1.26 0.24
 11 -3 7 0.63 0.23
 -11 -3 -7 1.01 0.34
 11 3 8 0.99 0.19
 11 -3 8 1.23 0.24
 -11 -3 -8 1.1 0.21
 -11 -3 -8 1.07 0.31
 11 3 9 0.05 0.09
 11 -3 9 0.03 0.14
 11 -3 9 0.15 0.11
 11 -4 -9 0 0.13
 -11 -4 9 0.03 0.1
 -11 4 8 1.65 0.48
 11 -4 -8 1.79 0.3
 -11 -4 8 2.03 0.26
 11 -4 -8 1.9 0.21
 -11 4 7 0.26 0.37
 -11 4 7 0.22 0.08
 -11 -4 7 0.42 0.19
 -11 -4 7 0.31 0.18
 11 -4 -7 0.3 0.2
 11 -4 -7 0.29 0.15
 -11 4 6 5.42 0.34
 -11 4 6 6.21 0.9
 11 -4 -6 4.97 0.45
 11 -4 -6 4.25 0.51
 -11 -4 6 5.51 0.5
 -11 4 5 2.6 0.62
 -11 4 5 2.78 0.25
 11 -4 -5 3.06 0.39
 -11 4 4 22.89 1.64
 11 4 -4 22.12 1.06
 -11 4 3 0.47 0.34
 11 4 -3 0.11 0.12
 -11 4 3 0.51 0.37
 -11 4 3 -0.02 0.47
 -11 4 2 0.16 0.31
 -11 4 2 0.39 0.35
 -11 4 2 0.26 0.3
 -11 4 1 1.25 0.42
 -11 4 1 0.79 0.44
 -11 4 1 1.06 0.42
 -11 4 0 0.75 0.28
 -11 4 0 0.28 0.33
 -11 -4 0 0.34 0.52
 -11 4 -1 3.46 0.56
 -11 4 -1 2.8 0.7
 -11 -4 -1 3.91 0.98
 11 4 2 0.15 0.12
 -11 4 -2 0.1 0.18
 -11 4 -2 0.11 0.43
 -11 4 -2 0.3 0.26
 -11 -4 -2 0.35 0.58
 -11 4 -3 9.1 0.52
 -11 4 -3 10.11 1.35
 -11 4 -3 8.82 0.95
 -11 4 -3 8.87 0.74
 11 4 3 9.07 0.59
 -11 4 -4 4.38 0.56
 -11 4 -4 4.05 0.35
 11 4 4 3.6 0.32
 11 4 4 3.92 0.39
 -11 -4 -4 2.82 0.74
 -11 -4 -4 4.03 0.44
 11 4 5 0.36 0.16
 11 4 5 0.43 0.14
 -11 4 -5 -0.04 0.28
 -11 -4 -5 0.19 0.29
 -11 -4 -5 -0.09 0.59
 11 4 6 2.73 0.32
 -11 -4 -6 2.83 0.41
 -11 -4 -6 3.13 0.57
 -11 -4 -6 2.4 0.36
 11 4 7 0.21 0.13
 -11 -4 -7 0.72 0.28
 -11 -4 -7 0.58 0.21
 11 4 8 -0.05 0.09
 11 -4 8 0.04 0.15
 -11 -4 -8 0.11 0.22
 -11 -4 -8 0.18 0.14
 11 -4 9 1.51 0.23
 -11 -4 -9 2.04 0.31
 -11 -4 -9 1.29 0.15
 11 -4 9 1.75 0.2
 -11 -5 9 0.05 0.11
 11 -5 -9 0.17 0.15
 -11 5 8 0.03 0.34
 11 -5 -8 0.1 0.11
 -11 -5 8 0.19 0.18
 -11 5 7 0.44 0.38
 -11 -5 7 0.22 0.17
 11 -5 -7 0.22 0.19
 11 -5 -7 0.37 0.16
 -11 5 6 0.26 0.35
 11 -5 -6 0.13 0.19
 -11 -5 6 0.16 0.22
 -11 5 5 39.25 2.51
 11 -5 -5 39.26 1.88
 -11 5 4 0.39 0.4
 -11 5 3 9.57 1.09
 -11 5 2 1.04 0.46
 -11 5 2 1.35 0.53
 -11 5 2 2.25 0.22
 -11 5 1 0.28 0.35
 -11 5 0 0.01 0.31
 11 5 0 0.05 0.1
 -11 5 0 0.02 0.23
 -11 -5 0 -0.15 0.56
 -11 5 -1 4.79 0.75
 -11 5 -1 5.04 0.6
 -11 5 -1 5.04 0.33
 -11 5 -1 3.65 0.8
 11 5 1 4.99 0.37
 -11 -5 -1 3.29 1
 11 5 2 4.4 0.36
 -11 5 -2 3.59 0.33
 -11 5 -2 4.04 0.84
 -11 5 -2 3.87 0.51
 -11 5 -3 0.26 0.27
 -11 5 -3 0.16 0.13
 11 5 3 0.18 0.15
 -11 -5 -3 0.01 0.25
 11 5 4 1.05 0.2
 -11 5 -4 0.88 0.31
 -11 5 -4 0.88 0.17
 -11 -5 -4 0.17 0.58
 -11 -5 -4 0.83 0.27
 11 5 5 0.47 0.16
 -11 5 -5 0.85 0.18
 -11 5 -5 0.64 0.3
 -11 -5 -5 0.49 0.31
 -11 -5 -5 1.38 0.75
 11 5 6 0.13 0.11
 -11 5 -6 0.17 0.13
 -11 -5 -6 0.31 0.32
 -11 -5 -6 -0.28 0.58
 11 5 7 0.27 0.09
 -11 -5 -7 0.13 0.18
 -11 -5 -7 0.26 0.19
 -11 -5 -7 0.31 0.24
 -11 -5 -8 0.02 0.21
 -11 -5 -8 0.03 0.14
 11 -5 8 0.33 0.16
 11 -5 9 2.57 0.24
 -11 -5 -9 2.14 0.21
 11 -6 -9 0.25 0.12
 -11 -6 9 0.28 0.12
 -11 6 8 0.15 0.35
 11 -6 -8 0.56 0.14
 -11 -6 8 0.68 0.19
 -11 6 7 1.24 0.45
 -11 -6 7 1.61 0.26
 11 -6 -7 1.13 0.23
 -11 6 6 0.25 0.38
 11 -6 -6 0.19 0.19
 -11 6 5 0.13 0.24
 -11 6 4 0.14 0.37
 -11 6 3 2.07 0.26
 -11 6 3 1.22 0.41
 -11 6 2 1.01 0.45
 -11 6 2 1.03 0.2
 -11 6 1 7.1 0.62
 -11 6 1 5.68 0.4
 -11 6 0 0.75 0.16
 11 6 0 0.55 0.57
 -11 6 0 1.36 0.35
 -11 6 -1 3.05 0.28
 -11 6 -1 3.03 0.48
 -11 6 -2 0.01 0.23
 -11 6 -2 0.04 0.12
 -11 6 -3 0.53 0.23
 -11 6 -3 0.49 0.15
 -11 -6 -3 0.68 0.28
 -11 6 -4 3.29 0.49
 -11 6 -4 2.74 0.29
 -11 -6 -4 2.84 0.74
 -11 -6 -4 3.35 0.41
 -11 6 -5 0.73 0.17
 -11 -6 -5 0.29 0.3
 -11 -6 -5 1.59 0.79
 -11 6 -6 5.51 0.38
 -11 -6 -6 5.06 0.86
 -11 -6 -6 5.18 0.52
 -11 6 -7 0.38 0.13
 -11 -6 -7 0.67 0.29
 -11 -6 -7 0.39 0.25
 -11 -6 -7 0.73 0.22
 -11 6 -8 0.36 0.12
 -11 -6 -8 0.47 0.16
 -11 -6 -8 0.08 0.15
 11 -7 -8 0.84 0.15
 -11 -7 8 0.82 0.17
 -11 7 7 1.33 0.4
 -11 -7 7 1.58 0.27
 11 -7 -7 2.32 0.28
 -11 7 6 0.31 0.35
 11 -7 -6 -0.18 0.19
 11 7 -5 1.09 0.21
 -11 7 5 1.09 0.45
 -11 7 4 6.23 0.45
 11 7 -4 7.22 0.45
 -11 7 4 6.97 0.93
 -11 7 3 2.78 0.65
 -11 7 3 3.14 0.31
 11 7 -3 2.94 0.28
 -11 7 2 14.27 0.73
 11 7 -2 13.89 0.75
 -11 7 2 14.38 1.06
 -11 7 2 15.5 1.29
 -11 7 1 0.25 0.27
 -11 7 1 0.15 0.11
 11 7 -1 0.11 0.15
 11 7 -1 -0.23 0.56
 11 7 0 -0.13 0.68
 -11 7 0 0.47 0.25
 -11 7 0 0.26 0.12
 -11 7 -1 1.29 0.34
 -11 7 -1 1.51 0.2
 -11 7 -2 0.69 0.15
 -11 7 -2 0.76 0.26
 -11 7 -3 5.59 0.6
 -11 7 -3 5.28 0.37
 -11 7 -4 1.07 0.31
 -11 7 -4 2.02 0.24
 -11 -7 -4 1.46 0.33
 -11 7 -5 0.13 0.1
 -11 -7 -5 0.23 0.3
 -11 -7 -5 0.09 0.53
 -11 -7 -6 -0.27 0.31
 -11 -7 -6 1.26 0.67
 -11 7 -7 -0.11 0.08
 -11 -7 -7 0.19 0.23
 -11 -7 -7 0.14 0.25
 -11 7 -8 0.66 0.13
 -11 -7 -8 0.49 0.21
 -11 -7 -8 0.8 0.17
 11 -8 -8 0.14 0.1
 -11 -8 8 0.27 0.13
 11 8 -7 0.46 0.14
 -11 8 7 0.21 0.31
 11 -8 -7 0.47 0.15
 -11 8 6 -0.2 0.23
 11 8 -6 0.29 0.13
 11 -8 -6 0.02 0.16
 11 8 -5 -0.09 0.1
 -11 8 5 -0.1 0.29
 11 8 -4 0.58 0.15
 -11 8 4 0.16 0.26
 -11 8 4 0.72 0.17
 -11 8 3 2.11 0.25
 11 8 -3 2.13 0.24
 -11 8 3 2.31 0.58
 11 8 -2 -0.05 0.17
 -11 8 2 -0.03 0.22
 -11 8 2 -0.01 0.09
 -11 8 2 -0.04 0.37
 11 8 -1 1.36 0.65
 -11 8 1 0.96 0.19
 11 8 -1 1.19 0.29
 -11 8 1 1.26 0.36
 -11 8 0 0.63 0.14
 11 8 0 0.63 0.28
 11 8 0 1.7 0.75
 -11 8 0 0.88 0.32
 11 8 1 -0.11 0.25
 -11 8 -1 0.09 0.08
 11 8 1 -1.14 0.78
 -11 8 -1 0 0.23
 -11 8 -2 0.95 0.3
 -11 8 -2 0.5 0.13
 -11 8 -3 0.63 0.23
 -11 8 -3 0.87 0.16
 -11 8 -4 0.57 0.14
 -11 -8 -4 0.31 0.28
 -11 8 -5 -0.07 0.08
 -11 -8 -5 0.31 0.7
 -11 -8 -5 0.03 0.31
 -11 8 -6 1.54 0.19
 -11 -8 -6 1.45 0.36
 -11 -8 -6 1.14 0.54
 -11 8 -7 1.24 0.16
 -11 -8 -7 1.22 0.28
 -11 -8 -7 1.18 0.23
 11 9 -7 0.24 0.11
 11 -9 -7 0.59 0.13
 11 9 -6 0.14 0.12
 -11 9 6 -0.24 0.27
 11 -9 -6 -0.06 0.13
 11 9 -5 2.32 0.26
 -11 9 5 1.63 0.48
 -11 9 5 2.47 0.25
 11 9 -4 0.21 0.12
 -11 9 4 0.32 0.12
 -11 9 4 0.17 0.33
 -11 9 3 12.83 1.3
 11 9 -3 13.2 0.69
 -11 9 3 14.36 0.7
 -11 9 3 13.3 0.99
 11 9 -2 4.69 0.41
 -11 9 2 4.49 0.58
 -11 9 2 4.6 0.36
 -11 9 1 -0.16 0.21
 -11 9 1 0.11 0.09
 11 9 -1 0.31 0.32
 11 9 0 1.53 0.34
 11 9 0 1.49 0.8
 -11 9 0 1.97 0.22
 -11 9 0 1.86 0.37
 -11 9 -1 0.53 0.28
 11 9 1 -0.61 0.91
 -11 9 -1 0.52 0.13
 11 9 1 0.62 0.32
 11 9 2 1.26 0.35
 -11 9 -2 0.77 0.15
 11 9 2 0.67 0.69
 -11 9 -2 1.12 0.32
 -11 9 -3 0.09 0.24
 -11 9 -3 -0.1 0.07
 -11 9 -4 1.25 0.17
 -11 -9 -4 1.65 0.35
 -11 9 -5 -0.19 0.07
 -11 -9 -5 0.04 0.32
 -11 -9 -5 0.12 0.57
 -11 9 -6 0.11 0.09
 -11 -9 -6 -0.2 0.25
 -11 -9 -6 0.52 0.31
 -11 9 -7 0.05 0.06
 -11 -9 -7 -0.05 0.12
 -11 -9 -7 0.06 0.15
 -11 10 6 1.37 0.17
 11 -10 -6 1.43 0.2
 -11 10 5 1.05 0.17
 11 10 -5 1.18 0.16
 -11 10 4 1.46 0.31
 -11 10 4 1.63 0.2
 -11 10 4 0.97 0.43
 11 10 -4 1.23 0.18
 -11 10 3 -0.1 0.36
 -11 10 3 0.39 0.1
 11 10 -3 0.15 0.09
 -11 10 3 0.3 0.16
 -11 10 2 0.09 0.2
 -11 10 2 -0.01 0.09
 11 10 -2 -0.09 0.11
 11 10 -1 1.16 0.28
 -11 10 1 1.45 0.19
 -11 10 1 1.13 0.31
 11 10 0 0.27 0.28
 -11 10 0 0.04 0.15
 -11 10 0 0.2 0.12
 11 10 0 -0.21 0.69
 11 10 1 1.84 0.37
 11 10 1 0.88 1.06
 -11 10 -1 1.57 0.19
 -11 10 -1 1.53 0.29
 11 10 2 6.4 0.53
 -11 10 -2 5.99 0.61
 11 10 2 4.87 1.17
 -11 10 -2 6.85 0.38
 11 10 3 0.72 0.88
 -11 10 -3 0.08 0.08
 11 10 3 0.02 0.3
 -11 10 -4 1.15 0.15
 -11 -10 -4 1.1 0.34
 -11 10 -5 0.33 0.09
 -11 -10 -5 0.62 0.31
 -11 -10 -5 0.56 0.36
 -11 10 -6 1.08 0.12
 -11 -10 -6 0.61 0.18
 -11 -10 -6 0.77 0.25
 11 11 -5 0.77 0.13
 -11 11 5 0.68 0.18
 -11 11 5 0.53 0.11
 -11 11 4 0.2 0.1
 11 11 -4 0.05 0.08
 -11 11 4 0.05 0.16
 -11 11 3 0.32 0.09
 -11 11 3 0.23 0.18
 11 11 -3 0.04 0.07
 -11 11 2 0.21 0.2
 -11 11 2 0.42 0.12
 11 11 -2 0.26 0.11
 -11 11 1 0.61 0.12
 -11 11 1 0.43 0.21
 11 11 -1 0.81 0.19
 -11 11 0 0.39 0.22
 -11 11 0 0.41 0.11
 11 11 0 0.43 0.26
 11 11 1 0.87 0.36
 -11 11 -1 1.3 0.27
 -11 11 -1 1.06 0.14
 11 11 1 0.95 1
 -11 11 -2 0.85 0.13
 11 11 2 1 0.96
 11 11 2 0.48 0.3
 -11 11 -2 0.63 0.23
 -11 11 -3 5.38 0.31
 -11 11 -4 1.01 0.12
 -11 -11 -4 0.56 0.35
 -11 11 -5 0.14 0.07
 -11 -11 -5 -0.02 0.24
 11 12 -3 0.33 0.1
 -11 12 3 0.24 0.17
 -11 12 3 0.24 0.09
 -11 12 2 0.21 0.08
 11 12 -2 0.01 0.07
 -11 12 2 0.17 0.13
 11 12 -1 0.08 0.08
 -11 12 1 -0.03 0.16
 -11 12 1 0.09 0.07
 11 12 0 0.03 0.13
 -11 12 0 -0.05 0.16
 -11 12 0 -0.07 0.06
 -11 12 -1 0.41 0.19
 -11 12 -1 0.54 0.09
 11 12 1 0.06 0.19
 11 12 2 0.26 0.26
 -11 12 -2 0.32 0.07
 11 12 3 1.43 0.23
 -12 0 10 -0.03 0.06
 -12 0 9 0.01 0.12
 12 0 -8 0.23 0.12
 -12 0 7 -0.07 0.1
 12 0 -7 -0.17 0.11
 12 0 -6 0.5 0.16
 -12 0 6 0.49 0.15
 12 0 -5 0.22 0.18
 -12 0 5 -0.14 0.12
 12 0 -5 0.04 0.11
 -12 0 5 0.21 0.22
 -12 0 5 -0.01 0.12
 12 0 -5 -0.09 0.12
 12 0 -4 7.58 0.65
 -12 0 4 6.57 0.47
 -12 0 4 5.62 0.79
 12 0 -4 6.49 0.45
 -12 0 4 7.83 0.98
 -12 0 3 -0.43 0.25
 -12 0 3 -0.04 0.3
 -12 0 2 0.91 0.38
 -12 0 2 0.6 0.38
 12 0 -1 0.13 0.31
 -12 0 1 0.2 0.28
 -12 0 1 -0.02 0.29
 -12 0 0 12.28 1.4
 -12 0 0 11.52 1
 12 0 0 11.42 1.03
 -12 0 -1 0.01 0.36
 12 0 1 0.22 0.26
 -12 0 -2 0.22 0.27
 -12 0 -3 0.29 0.37
 -12 0 -3 -0.06 0.15
 -12 0 -4 8.19 0.71
 12 0 4 8.06 0.58
 -12 0 -4 8.8 0.59
 12 0 5 0.03 0.22
 -12 0 -5 -0.03 0.14
 -12 0 -5 0.12 0.26
 12 0 5 0.09 0.18
 12 0 6 4.38 0.47
 -12 0 -6 4.1 0.58
 12 0 6 4.01 0.4
 -12 0 -7 -0.06 0.25
 12 0 7 0.07 0.15
 12 0 7 -0.05 0.13
 -12 0 -8 7.33 0.66
 12 0 8 7.54 0.61
 12 0 8 8.16 0.54
 12 0 8 8.02 0.45
 12 0 9 -0.23 0.12
 12 0 9 0.18 0.09
 -12 -1 10 0.03 0.08
 -12 1 9 0.87 0.16
 -12 -1 9 1.1 0.21
 12 -1 -9 0.94 0.13
 -12 -1 9 1.23 0.15
 12 1 -8 0.07 0.08
 -12 1 8 0.07 0.14
 12 -1 -8 0.09 0.11
 -12 -1 8 -0.07 0.09
 12 1 -7 0.09 0.14
 -12 -1 7 0.27 0.15
 12 -1 -7 0.33 0.18
 12 1 -6 6.81 0.54
 -12 -1 6 7.64 0.51
 12 -1 -6 7.97 0.47
 12 -1 -6 7.86 0.62
 12 -1 -6 7.08 0.53
 12 1 -5 1.51 0.23
 -12 1 5 1.42 0.2
 12 1 -5 1.52 0.27
 -12 1 5 2.02 0.55
 12 -1 -5 1.71 0.26
 -12 -1 5 1.79 0.26
 12 -1 -5 1.66 0.29
 12 -1 -5 1.63 0.31
 12 1 -4 1.06 0.26
 -12 1 4 0.49 0.15
 -12 1 4 1.13 0.38
 -12 -1 4 0.29 0.26
 -12 -1 4 0.47 0.16
 12 -1 -4 0.67 0.2
 -12 1 3 0.82 0.39
 -12 1 3 0.46 0.32
 -12 -1 3 0.9 0.41
 -12 1 2 5.69 0.79
 -12 1 2 5.66 0.92
 -12 1 2 5.49 0.7
 -12 -1 2 5.23 0.76
 -12 1 1 4.6 0.7
 -12 1 1 4.27 0.59
 -12 1 1 4.04 0.82
 -12 -1 1 5.22 0.75
 -12 -1 1 3.46 0.74
 -12 1 0 19.35 1.36
 -12 1 0 16.5 1.62
 -12 -1 0 18.97 1.39
 -12 -1 0 18.51 1.66
 -12 1 -1 0.33 0.4
 -12 -1 -1 0.25 0.29
 -12 1 -2 -0.05 0.39
 -12 -1 -2 0.31 0.4
 -12 1 -3 0.25 0.21
 -12 1 -3 0.2 0.48
 -12 -1 -3 0.25 0.2
 -12 -1 -3 -0.04 0.45
 12 1 4 0.69 0.19
 12 1 4 0.55 0.23
 -12 1 -4 0.47 0.3
 -12 -1 -4 0.5 0.24
 -12 -1 -4 0.3 0.19
 12 -1 4 0.27 0.24
 12 1 5 -0.07 0.2
 12 1 5 -0.09 0.14
 -12 1 -5 0.01 0.27
 -12 -1 -5 0.1 0.15
 -12 -1 -5 -0.33 0.21
 12 -1 5 0.28 0.21
 12 1 6 0.52 0.2
 -12 1 -6 0.5 0.3
 12 1 6 0.14 0.14
 12 1 6 0.54 0.21
 -12 -1 -6 0.31 0.22
 12 -1 6 0.46 0.19
 12 -1 6 0.27 0.26
 -12 -1 -6 0.08 0.12
 -12 1 -7 0.39 0.28
 12 1 7 0.22 0.22
 12 1 7 0.06 0.13
 12 1 7 0.03 0.14
 12 -1 7 -0.09 0.14
 -12 -1 -7 0.05 0.11
 -12 -1 -7 0.34 0.26
 12 -1 7 0.03 0.18
 12 1 8 0.16 0.14
 12 1 8 -0.03 0.16
 -12 -1 -8 -0.11 0.21
 12 -1 8 0.1 0.15
 12 -1 8 0.3 0.15
 12 1 9 0 0.13
 12 -1 9 0.1 0.09
 12 -1 9 0.02 0.15
 12 -1 9 0.2 0.1
 -12 2 9 1.23 0.12
 -12 -2 9 2.27 0.28
 12 -2 -9 1.27 0.18
 -12 2 8 0.35 0.11
 12 -2 -8 0.34 0.16
 -12 -2 8 0.67 0.16
 12 2 -7 1.97 0.2
 -12 2 7 2.6 0.3
 12 -2 -7 2.77 0.38
 -12 -2 7 2.49 0.28
 12 -2 -7 2.76 0.25
 -12 2 6 0.49 0.42
 12 2 -6 0.43 0.13
 12 -2 -6 0.3 0.25
 12 -2 -6 0.56 0.16
 -12 -2 6 0.55 0.17
 12 -2 -6 0.66 0.21
 -12 -2 6 0.49 0.17
 12 2 -5 4.21 0.41
 -12 2 5 4 0.7
 12 -2 -5 4.45 0.5
 -12 -2 5 4.74 0.43
 12 -2 -5 4.9 0.42
 12 2 -4 7.11 0.55
 -12 2 4 9.24 1.03
 12 -2 -4 7.75 0.55
 -12 -2 4 7.79 0.99
 -12 -2 4 7.49 0.54
 -12 2 3 1.3 0.36
 12 2 -3 2.1 0.3
 -12 2 3 1.35 0.5
 -12 -2 3 2.02 0.53
 -12 2 2 -0.1 0.19
 -12 2 2 -0.27 0.27
 -12 2 2 0.03 0.26
 -12 -2 2 0.13 0.32
 -12 2 1 0.16 0.25
 -12 2 1 0.17 0.27
 -12 2 1 0.59 0.32
 -12 -2 1 0.17 0.38
 -12 2 0 0.18 0.26
 -12 2 0 0 0.34
 -12 -2 0 0.23 0.3
 -12 2 -1 0.59 0.28
 -12 2 -1 1.34 0.53
 -12 -2 -1 1.81 0.59
 -12 2 -2 0.42 0.36
 -12 -2 -2 0.13 0.49
 -12 2 -3 8.89 0.8
 12 2 3 10.05 0.7
 -12 2 -3 9.32 1.33
 -12 -2 -3 9.47 0.7
 -12 2 -4 1.23 0.31
 12 2 4 1.06 0.29
 12 2 4 1.09 0.21
 12 2 4 1.36 0.27
 -12 -2 -4 1.22 0.28
 -12 -2 -4 1.28 0.25
 -12 -2 -4 0.39 0.3
 -12 2 -5 -0.11 0.16
 12 2 5 0.46 0.19
 12 2 5 0.23 0.15
 12 2 5 0.24 0.18
 -12 -2 -5 0.1 0.18
 12 -2 5 0.02 0.15
 -12 -2 -5 0.32 0.12
 -12 -2 -5 0.34 0.19
 12 2 6 7.56 0.65
 -12 2 -6 8.11 0.78
 12 2 6 7.41 0.57
 12 2 6 7.29 0.44
 -12 -2 -6 7.25 0.73
 -12 -2 -6 7.57 0.56
 12 -2 6 6.86 0.55
 -12 2 -7 8.82 0.78
 12 2 7 9.41 0.61
 12 2 7 10.09 0.68
 12 -2 7 9.73 0.72
 -12 -2 -7 9.98 0.63
 -12 -2 -7 9.84 0.8
 12 -2 7 9.56 0.64
 12 2 8 3.68 0.27
 12 2 8 4.12 0.38
 12 -2 8 3.61 0.38
 12 -2 8 3.62 0.34
 -12 -2 -8 2.98 0.43
 12 2 9 2.3 0.23
 12 -2 9 2.74 0.26
 12 -2 9 1.98 0.19
 -12 -3 9 0.63 0.19
 -12 -3 9 0.34 0.1
 12 -3 -9 0.64 0.16
 -12 3 8 0.15 0.06
 -12 3 8 0.18 0.25
 -12 -3 8 -0.01 0.13
 12 -3 -8 0.13 0.14
 -12 3 7 0.1 0.35
 -12 3 7 0.15 0.11
 12 -3 -7 0.26 0.23
 -12 -3 7 0.57 0.2
 12 -3 -7 0.5 0.16
 12 3 -6 1.78 0.17
 -12 3 6 1.3 0.46
 -12 3 6 1.61 0.24
 12 -3 -6 2.67 0.36
 -12 -3 6 1.95 0.28
 12 -3 -6 2.37 0.27
 -12 3 5 1.95 0.52
 12 3 -5 2.15 0.26
 -12 -3 5 2.55 0.34
 12 -3 -5 2.6 0.33
 12 -3 -5 3.27 0.45
 -12 3 4 0.02 0.21
 12 3 -4 0.21 0.14
 -12 -3 4 0.11 0.35
 12 -3 -4 0.13 0.15
 -12 -3 4 0.19 0.2
 -12 3 3 13.23 1.1
 12 3 -3 10.98 0.7
 -12 3 3 11.73 1.43
 -12 -3 3 13.06 1.26
 12 3 -2 1.7 0.25
 -12 3 2 1.5 0.58
 -12 3 2 1.22 0.38
 -12 3 2 1.01 0.38
 -12 3 1 10.14 0.99
 -12 3 1 11.1 1.36
 -12 3 1 11.59 1
 -12 -3 1 11.09 1.31
 -12 3 0 0.49 0.33
 -12 3 0 0.4 0.34
 -12 -3 0 0.28 0.43
 -12 3 -1 17.02 1.25
 -12 3 -1 16.31 1.65
 -12 -3 -1 15.67 1.7
 -12 3 -2 0.57 0.21
 12 3 2 0.12 0.17
 -12 3 -2 0.02 0.32
 -12 3 -2 0.18 0.36
 -12 -3 -2 0.14 0.7
 12 3 3 7.48 0.56
 -12 3 -3 6.79 0.72
 12 3 3 6.54 0.41
 -12 -3 -3 7.33 0.56
 12 3 4 0.07 0.15
 -12 3 -4 0.2 0.27
 12 3 4 0.27 0.19
 12 3 4 0.13 0.13
 -12 -3 -4 -0.17 0.15
 -12 -3 -4 0.03 0.23
 -12 -3 -4 0 0.21
 12 3 5 0.72 0.17
 12 3 5 0.76 0.19
 -12 3 -5 0.84 0.32
 -12 -3 -5 0.96 0.24
 -12 -3 -5 1.06 0.29
 -12 -3 -5 0.85 0.32
 12 3 6 0.1 0.16
 -12 3 -6 -0.02 0.27
 12 3 6 -0.08 0.13
 -12 -3 -6 0.05 0.17
 -12 -3 -6 0.27 0.25
 12 -3 6 -0.24 0.2
 12 3 7 0.13 0.15
 12 3 7 0.16 0.1
 12 -3 7 -0.13 0.22
 -12 -3 -7 0.17 0.25
 -12 -3 -7 0.09 0.13
 12 3 8 -0.09 0.07
 -12 -3 -8 0.12 0.1
 -12 -3 -8 0.32 0.26
 12 -3 8 -0.05 0.16
 12 -3 8 0.01 0.16
 12 -3 9 0.86 0.17
 12 -3 9 0.82 0.14
 -12 -4 9 0.17 0.09
 12 -4 -9 0.68 0.16
 -12 4 8 0.16 0.24
 -12 -4 8 0.48 0.14
 12 -4 -8 0.31 0.17
 12 -4 -8 0.24 0.09
 -12 4 7 2.12 0.58
 -12 -4 7 2.72 0.32
 12 -4 -7 2.4 0.28
 -12 -4 7 2.67 0.32
 12 -4 -7 2.15 0.3
 -12 4 6 0 0.06
 -12 4 6 -0.16 0.36
 12 -4 -6 0.04 0.14
 -12 -4 6 -0.09 0.16
 12 -4 -6 -0.17 0.14
 -12 4 5 0.12 0.08
 -12 4 5 -0.16 0.31
 -12 -4 5 0.2 0.2
 12 -4 -5 0.34 0.21
 -12 4 4 49.89 2.89
 12 4 -4 47.95 2.11
 -12 4 4 46.61 2.1
 12 -4 -4 47.59 2.19
 -12 -4 4 46.47 2.18
 -12 4 3 0.79 0.41
 12 4 -3 0.52 0.14
 -12 4 2 0.44 0.47
 -12 4 2 0.82 0.42
 12 4 -2 0.32 0.15
 12 4 -1 14.65 0.8
 -12 4 1 14.91 1.2
 -12 4 1 13.22 1.18
 -12 4 1 13.44 1.61
 12 4 0 22 1.15
 -12 4 0 21.33 2.02
 -12 4 0 23.56 1.58
 -12 -4 0 24.87 2.07
 12 4 1 0.63 0.18
 -12 4 -1 0.99 0.24
 -12 4 -1 0.87 0.56
 -12 4 -1 0.83 0.45
 -12 -4 -1 1.58 0.67
 12 4 2 0.66 0.18
 -12 4 -2 0.29 0.27
 -12 -4 -2 0.94 0.25
 12 4 3 1.13 0.21
 12 4 3 1.2 0.19
 -12 4 -3 0.95 0.33
 -12 -4 -3 1.16 0.32
 12 4 4 1.07 0.17
 -12 4 -4 1.28 0.36
 12 4 4 0.75 0.19
 -12 -4 -4 1.38 0.33
 -12 -4 -4 1.65 0.46
 -12 4 -5 8.16 0.76
 12 4 5 8.59 0.59
 -12 -4 -5 9.53 0.77
 -12 -4 -5 8.42 0.63
 -12 -4 -5 9.69 0.72
 12 4 6 7.73 0.54
 -12 4 -6 7.87 0.72
 -12 -4 -6 8.32 0.7
 -12 -4 -6 8.39 0.62
 -12 -4 -6 8.16 0.52
 12 4 7 1.46 0.21
 -12 -4 -7 1.34 0.33
 12 -4 7 1.49 0.27
 -12 -4 -7 1.4 0.26
 12 4 8 3.13 0.22
 -12 -4 -8 3.53 0.31
 12 -4 8 3.43 0.34
 -12 -4 -8 3.06 0.4
 12 -4 9 0.56 0.13
 12 -4 9 0.9 0.17
 12 -5 -9 -0.07 0.09
 -12 -5 9 0.01 0.09
 -12 5 8 -0.2 0.31
 12 -5 -8 0.05 0.09
 -12 -5 8 0 0.11
 12 -5 -8 0.09 0.14
 -12 5 7 -0.16 0.28
 -12 -5 7 0.03 0.14
 -12 -5 7 0.1 0.15
 12 -5 -7 -0.02 0.14
 -12 5 6 1.34 0.48
 -12 -5 6 1.42 0.27
 12 -5 -6 1.56 0.28
 12 -5 -6 2.19 0.35
 -12 5 5 1.94 0.57
 -12 -5 5 2.77 0.37
 12 -5 -5 2.22 0.34
 -12 5 4 5.26 0.82
 -12 5 3 6.95 0.91
 -12 5 2 17.5 1.4
 -12 5 1 0.72 0.14
 12 5 -1 0.27 0.11
 -12 5 0 0.15 0.12
 12 5 0 -0.04 0.09
 -12 5 -1 0.58 0.3
 -12 5 -1 0.9 0.18
 12 5 1 0.79 0.16
 -12 5 -2 0.31 0.13
 -12 5 -2 0.7 0.3
 12 5 2 0.56 0.16
 -12 -5 -2 0.39 0.21
 -12 5 -3 0.13 0.25
 -12 5 -3 0.09 0.12
 12 5 3 0.05 0.11
 -12 -5 -3 -0.5 0.24
 -12 5 -4 0.14 0.24
 -12 5 -4 0.09 0.12
 12 5 4 0.14 0.13
 -12 -5 -4 0.78 0.5
 -12 -5 -4 -0.12 0.31
 -12 5 -5 0.12 0.23
 -12 5 -5 0.1 0.13
 12 5 5 0.11 0.12
 -12 -5 -5 0.26 0.39
 -12 -5 -5 0.46 0.41
 12 5 6 0.01 0.09
 -12 5 -6 -0.02 0.12
 -12 -5 -6 0.01 0.22
 -12 -5 -6 -0.09 0.22
 -12 -5 -6 0.13 0.19
 -12 -5 -7 1.15 0.24
 -12 -5 -7 1.41 0.32
 -12 -5 -8 1.77 0.32
 12 -5 8 2.13 0.25
 -12 -5 -8 1.54 0.21
 -12 -6 8 2.93 0.27
 12 -6 -8 2.53 0.22
 -12 6 7 0.13 0.33
 12 -6 -7 0.26 0.14
 -12 -6 7 0.33 0.17
 -12 -6 7 0.41 0.16
 -12 6 6 0.28 0.29
 -12 -6 6 0.18 0.19
 12 -6 -6 0.45 0.18
 -12 6 5 14.1 1.4
 12 -6 -5 14.28 0.86
 -12 6 4 4.29 0.76
 -12 6 3 -0.15 0.31
 -12 6 2 0.08 0.34
 -12 6 2 0.08 0.12
 -12 6 1 13.77 0.69
 -12 6 1 12.39 0.94
 -12 6 0 2.33 0.25
 -12 6 0 1.46 0.32
 -12 6 -1 4.29 0.54
 -12 6 -1 4.12 0.35
 -12 6 -2 3.23 0.31
 -12 6 -2 3.48 0.5
 -12 -6 -2 3.22 0.44
 -12 6 -3 0.41 0.21
 -12 6 -3 0.39 0.13
 -12 -6 -3 0.18 0.2
 -12 6 -4 2.6 0.27
 -12 6 -4 2.42 0.42
 -12 -6 -4 2.29 0.41
 -12 6 -5 2.8 0.3
 -12 6 -5 2.71 0.44
 -12 -6 -5 2.29 0.42
 -12 -6 -5 2.42 0.52
 -12 6 -6 0.4 0.13
 -12 -6 -6 0.94 0.35
 -12 -6 -6 0.25 0.26
 -12 6 -7 0.04 0.1
 -12 -6 -7 0.06 0.15
 -12 -6 -7 0.01 0.15
 -12 -6 -8 0.32 0.12
 -12 -6 -8 0.2 0.19
 12 -6 8 0.11 0.18
 12 -7 -8 0.04 0.08
 -12 -7 8 0.03 0.1
 -12 7 7 1.19 0.44
 -12 -7 7 2.45 0.28
 12 -7 -7 1.97 0.24
 -12 -7 7 2.43 0.27
 -12 7 6 4 0.67
 12 -7 -6 3.67 0.36
 -12 7 5 0.27 0.34
 12 -7 -5 0.71 0.26
 -12 7 4 1.11 0.39
 -12 7 3 0.69 0.17
 -12 7 3 0.83 0.46
 -12 7 2 41.37 1.74
 -12 7 2 41.33 2.33
 -12 7 2 39.23 2.49
 -12 7 1 19.68 1.32
 -12 7 1 20.57 0.95
 -12 7 0 2.12 0.25
 -12 7 0 1.19 0.33
 -12 7 -1 4.17 0.35
 -12 7 -1 3.7 0.53
 -12 7 -2 3.24 0.3
 -12 7 -2 3.32 0.5
 -12 7 -3 1.45 0.35
 -12 7 -3 1.78 0.22
 -12 -7 -3 1.25 0.34
 -12 7 -4 0.6 0.27
 -12 7 -4 0.78 0.16
 -12 -7 -4 1.52 0.38
 -12 7 -5 0.17 0.1
 -12 -7 -5 0.39 0.35
 -12 -7 -5 -0.2 0.33
 -12 7 -6 1.38 0.19
 -12 -7 -6 1.18 0.31
 -12 -7 -6 1.01 0.3
 -12 7 -7 0.02 0.1
 -12 -7 -7 0.06 0.19
 -12 -7 -7 -0.01 0.16
 -12 -7 -7 0 0.09
 -12 -8 7 0.2 0.14
 -12 -8 7 0.16 0.15
 12 -8 -7 0.36 0.12
 -12 8 6 0.71 0.4
 12 8 -6 -0.03 0.12
 12 -8 -6 -0.03 0.14
 12 8 -5 0.35 0.14
 -12 8 5 0.08 0.35
 -12 8 4 0.49 0.14
 -12 8 4 -0.11 0.34
 12 8 -4 0.66 0.15
 -12 8 3 7.32 0.96
 -12 8 3 7.82 0.48
 12 8 -3 7.75 0.47
 12 8 -2 4.05 0.36
 -12 8 2 3.92 0.52
 -12 8 2 3.87 0.34
 -12 8 1 2.59 0.27
 -12 8 1 1.87 0.41
 12 8 -1 2.87 0.36
 -12 8 0 2.31 0.25
 -12 8 0 2.45 0.46
 -12 8 -1 5.32 0.63
 12 8 1 4.72 1
 -12 8 -1 5.83 0.38
 -12 8 -2 0.02 0.16
 -12 8 -2 0.03 0.09
 -12 8 -3 0.42 0.24
 -12 8 -3 0.1 0.09
 -12 -8 -3 -0.17 0.27
 -12 8 -4 0 0.22
 -12 8 -4 -0.01 0.08
 -12 -8 -4 0.58 0.33
 -12 8 -5 0.79 0.16
 -12 -8 -5 1.18 0.44
 -12 -8 -5 1.08 0.47
 -12 8 -6 0.65 0.14
 -12 -8 -6 0.56 0.3
 -12 -8 -6 0.73 0.24
 -12 8 -7 1.35 0.15
 -12 -8 -7 1.18 0.24
 12 9 -6 0.32 0.13
 12 -9 -6 0.64 0.15
 12 9 -5 0.24 0.11
 -12 9 5 0.12 0.14
 -12 9 5 0.26 0.37
 -12 9 4 0.27 0.34
 12 9 -4 0.72 0.15
 -12 9 4 0.72 0.15
 12 9 -3 3.97 0.33
 -12 9 3 2.97 0.63
 -12 9 3 3.54 0.32
 -12 9 3 3.86 0.49
 -12 9 2 0.33 0.24
 12 9 -2 0.6 0.17
 -12 9 2 0.16 0.11
 -12 9 1 2.03 0.37
 12 9 -1 1.75 0.3
 -12 9 1 2.37 0.25
 -12 9 0 0.15 0.23
 12 9 0 0.71 0.3
 -12 9 0 0.23 0.11
 12 9 1 0.82 0.88
 -12 9 -1 1.62 0.36
 -12 9 -1 1.75 0.21
 12 9 1 1.99 0.36
 -12 9 -2 1.36 0.18
 -12 9 -2 2.07 0.37
 12 9 2 0.91 0.84
 -12 9 -3 1.67 0.33
 -12 9 -3 1.07 0.16
 -12 -9 -3 0.96 0.35
 -12 9 -4 0.26 0.11
 -12 -9 -4 0.26 0.32
 -12 9 -5 0.19 0.08
 -12 -9 -5 0.24 0.26
 -12 -9 -5 -0.14 0.28
 -12 9 -6 -0.02 0.05
 -12 -9 -6 -0.21 0.16
 -12 -9 -6 0.27 0.18
 12 10 -6 -0.06 0.07
 12 -10 -6 0.01 0.1
 -12 10 5 -0.08 0.07
 12 10 -5 0.09 0.08
 -12 10 4 2.39 0.23
 12 10 -4 2.45 0.24
 -12 10 4 2.01 0.34
 12 10 -3 0.07 0.09
 -12 10 3 -0.06 0.08
 -12 10 3 -0.04 0.17
 12 10 -2 0.15 0.11
 -12 10 2 0.23 0.1
 -12 10 2 -0.1 0.12
 -12 10 1 2.14 0.37
 -12 10 1 2 0.22
 12 10 -1 2.71 0.28
 -12 10 0 0.9 0.16
 -12 10 0 0.62 0.25
 12 10 0 1.35 0.31
 -12 10 -1 0.02 0.07
 -12 10 -1 0.05 0.2
 12 10 1 0.39 0.29
 12 10 2 0.43 0.86
 -12 10 -2 0.62 0.25
 -12 10 -2 0.81 0.14
 12 10 2 0.49 0.3
 -12 10 -3 0.59 0.28
 -12 10 -3 0.79 0.14
 -12 -10 -3 0.95 0.34
 -12 10 -4 0.48 0.11
 -12 -10 -4 0.8 0.31
 -12 10 -5 0.5 0.09
 -12 -10 -5 0.23 0.27
 -12 11 4 -0.01 0.07
 12 11 -4 -0.01 0.06
 -12 11 4 0.07 0.14
 -12 11 3 0.17 0.1
 -12 11 3 -0.07 0.16
 12 11 -3 0.12 0.09
 -12 11 2 0.37 0.17
 12 11 -2 0.85 0.15
 -12 11 2 1.06 0.15
 -12 11 1 0.05 0.12
 12 11 -1 0.01 0.08
 -12 11 1 0.03 0.09
 12 11 0 -0.28 0.14
 -12 11 0 0.01 0.16
 -12 11 0 0.04 0.08
 12 11 1 0.14 0.23
 -12 11 -1 -0.03 0.16
 -12 11 -1 -0.04 0.06
 12 11 2 0.56 0.26
 -12 11 -2 0.5 0.1
 -12 11 -2 0.08 0.18
 12 11 3 0.44 0.28
 -12 11 -3 0.31 0.08
 -12 -11 -3 0.51 0.25
 -12 11 -4 -0.02 0.06
 -12 -11 -4 -0.14 0.18
 12 12 -2 1.22 0.14
 -12 12 2 1.16 0.13
 -12 12 2 1.15 0.21
 -12 12 1 0.07 0.06
 12 12 -1 0.21 0.09
 -12 12 1 -0.25 0.14
 -12 12 0 0.1 0.06
 12 12 0 0.06 0.09
 -12 12 0 -0.15 0.14
 -12 12 -1 0.01 0.06
 -12 12 -1 -0.04 0.17
 12 12 1 -0.04 0.11
 -12 12 -2 3.41 0.19
 12 12 2 3.02 0.25
 -13 0 9 0.06 0.08
 13 0 -8 5.51 0.37
 13 0 -7 -0.12 0.1
 13 0 -6 0.14 0.16
 -13 0 6 -0.06 0.1
 13 0 -5 0.12 0.12
 13 0 -5 0.2 0.18
 13 0 -5 0.27 0.17
 -13 0 5 -0.31 0.28
 -13 0 5 -0.03 0.12
 13 0 -4 0 0.19
 -13 0 4 0.01 0.12
 -13 0 4 0.16 0.25
 13 0 -4 0.13 0.15
 13 0 -4 0.28 0.17
 -13 0 4 0.12 0.13
 -13 0 3 0.1 0.33
 13 0 -3 0.14 0.18
 13 0 -3 0.33 0.23
 -13 0 3 -0.02 0.12
 -13 0 2 11.6 1.2
 -13 0 1 -0.31 0.31
 -13 0 1 -0.38 0.39
 -13 0 0 4.01 0.7
 -13 0 0 4.05 0.84
 -13 0 -1 -0.18 0.37
 -13 0 -2 9.6 0.6
 -13 0 -2 5.01 1.06
 13 0 3 0.17 0.13
 -13 0 -3 0.23 0.2
 13 0 4 0.76 0.25
 -13 0 -4 1.49 0.41
 13 0 4 0.89 0.22
 -13 0 -5 -0.34 0.23
 13 0 5 -0.08 0.14
 13 0 5 0.35 0.24
 13 0 6 1.02 0.21
 13 0 6 1.11 0.26
 -13 0 -6 1.38 0.36
 13 0 7 0.03 0.13
 -13 0 -7 0.15 0.25
 13 0 7 0 0.13
 13 0 8 4.24 0.41
 -13 0 -8 2.6 0.38
 13 0 8 3.22 0.23
 13 0 8 3.27 0.31
 13 0 9 -0.12 0.1
 13 0 9 0.05 0.07
 -13 1 9 0.09 0.08
 -13 -1 9 0.3 0.13
 13 -1 -9 -0.03 0.07
 -13 1 8 0.15 0.11
 13 -1 -8 0.22 0.11
 -13 1 7 4.81 0.78
 13 1 -7 5.11 0.39
 -13 -1 7 5.04 0.35
 13 -1 -7 5.74 0.5
 13 1 -6 9 0.6
 -13 1 6 7.15 1
 13 -1 -6 8.48 0.65
 13 -1 -6 8.75 0.48
 -13 -1 6 8.44 0.53
 13 -1 -6 8.25 0.57
 -13 1 5 0.72 0.4
 13 1 -5 0.07 0.15
 13 1 -5 -0.02 0.11
 13 -1 -5 0.31 0.19
 -13 -1 5 -0.08 0.21
 13 -1 -5 -0.08 0.14
 -13 -1 5 0.06 0.15
 -13 -1 5 0.21 0.16
 13 -1 -5 0.09 0.2
 13 1 -4 0.23 0.2
 13 1 -4 0.58 0.18
 -13 1 4 0.42 0.37
 13 -1 -4 0.51 0.21
 -13 -1 4 0.4 0.31
 -13 -1 4 0.54 0.17
 13 -1 -4 0.84 0.24
 13 1 -3 8.58 0.65
 -13 1 3 9.25 1.08
 13 1 -3 8.54 0.52
 13 -1 -3 8.51 0.57
 -13 -1 3 8.84 0.54
 -13 -1 3 8.59 1.04
 13 1 -2 0.19 0.17
 -13 1 2 0.21 0.46
 -13 1 2 0.31 0.38
 -13 -1 2 0.23 0.26
 -13 1 1 0.02 0.31
 -13 1 1 -0.12 0.23
 -13 -1 1 0.18 0.39
 -13 -1 1 0.66 0.32
 -13 1 0 2.64 0.71
 -13 -1 0 1.99 0.54
 -13 -1 0 0.9 0.53
 -13 1 -1 -0.31 0.37
 -13 -1 -1 0.41 0.5
 -13 -1 -2 2.21 0.67
 13 1 3 0.6 0.25
 13 1 3 1.13 0.22
 -13 1 -3 0.4 0.31
 13 -1 3 0.46 0.24
 -13 -1 -3 1.21 0.32
 -13 -1 -3 0.99 0.21
 -13 -1 -3 0.76 0.16
 -13 1 -4 6.15 0.65
 13 1 4 5.06 0.48
 13 1 4 4.66 0.41
 -13 -1 -4 5.77 0.64
 -13 -1 -4 5.21 0.49
 13 -1 4 5.5 0.48
 13 1 5 -0.19 0.15
 -13 1 -5 -0.01 0.16
 13 1 5 -0.07 0.16
 13 -1 5 -0.01 0.25
 -13 -1 -5 -0.02 0.13
 -13 -1 -5 -0.13 0.24
 13 -1 5 0.21 0.19
 -13 1 -6 2.33 0.42
 13 1 6 1.8 0.34
 13 1 6 1.85 0.3
 13 1 6 1.8 0.24
 13 -1 6 1.72 0.27
 -13 -1 -6 2.18 0.42
 13 -1 6 1.46 0.32
 13 1 7 0.18 0.13
 13 1 7 0.2 0.11
 13 1 7 -0.17 0.17
 -13 1 -7 0.3 0.25
 -13 -1 -7 0.26 0.2
 13 -1 7 -0.01 0.17
 13 -1 7 -0.02 0.13
 13 1 8 -0.03 0.09
 13 1 8 0.32 0.16
 13 -1 8 0.1 0.09
 13 -1 8 0.02 0.12
 -13 -1 -8 -0.05 0.2
 13 1 9 0.07 0.1
 13 -1 9 -0.2 0.07
 13 -1 9 0.16 0.14
 -13 -2 9 -0.2 0.14
 13 -2 -9 -0.04 0.07
 -13 2 8 0.78 0.14
 -13 -2 8 1.15 0.15
 13 -2 -8 0.55 0.16
 13 2 -7 2.74 0.19
 -13 2 7 2.04 0.54
 -13 2 7 2.79 0.29
 13 -2 -7 2.84 0.37
 -13 -2 7 3.03 0.29
 -13 2 6 -0.05 0.29
 13 2 -6 0.04 0.12
 13 -2 -6 -0.03 0.14
 -13 -2 6 0.05 0.12
 -13 -2 6 0.19 0.13
 13 -2 -6 0 0.12
 13 -2 -6 -0.09 0.14
 13 2 -5 2.31 0.29
 -13 2 5 2.23 0.55
 13 -2 -5 2.62 0.29
 -13 -2 5 2.25 0.29
 13 -2 -5 2.22 0.35
 -13 -2 5 3.08 0.63
 -13 2 4 7.15 0.95
 13 2 -4 6.78 0.53
 13 2 -4 7.07 0.44
 13 -2 -4 7.08 0.52
 -13 -2 4 7.27 0.51
 -13 -2 4 8.24 1.02
 13 -2 -4 7.4 0.59
 -13 2 3 0.27 0.35
 13 2 -3 0.54 0.2
 13 2 -3 0.34 0.18
 -13 -2 3 0.28 0.18
 -13 -2 3 0.65 0.39
 13 -2 -3 0.62 0.24
 -13 2 2 5.61 1
 -13 2 2 5.16 0.71
 13 2 -2 5.42 0.49
 -13 2 2 4.82 0.73
 -13 -2 2 4.22 0.75
 -13 2 1 8.5 0.92
 -13 2 1 8.77 1.2
 -13 2 1 7.27 0.89
 13 2 -1 7.48 0.56
 -13 -2 1 7.16 0.93
 -13 -2 1 8.6 1.15
 -13 2 0 3.3 0.56
 13 2 0 4.22 0.43
 -13 2 0 4.1 0.86
 -13 -2 0 4.47 0.85
 -13 2 -1 13.86 1.65
 13 2 1 14.26 0.89
 -13 -2 -1 15.5 1.57
 13 2 2 9.95 0.69
 13 2 2 9.34 0.54
 -13 2 -2 8.92 0.75
 -13 -2 -2 8.85 0.57
 -13 -2 -2 8.97 0.7
 -13 2 -3 7.51 0.7
 13 2 3 7.84 0.58
 13 2 3 8.51 0.51
 13 2 3 7.61 0.66
 -13 -2 -3 8.77 0.68
 -13 -2 -3 8.7 0.63
 -13 -2 -3 7.83 0.51
 13 2 4 15.74 0.8
 -13 2 -4 14.9 1.11
 13 2 4 15.82 0.91
 13 2 4 15.77 0.97
 -13 -2 -4 16.35 0.78
 -13 -2 -4 14.36 1.06
 13 -2 4 15.74 0.93
 -13 -2 -4 15.81 0.94
 13 2 5 1.52 0.31
 13 2 5 1.44 0.25
 -13 2 -5 1.71 0.4
 13 2 5 1.82 0.22
 13 -2 5 1.57 0.3
 -13 -2 -5 1.42 0.26
 -13 -2 -5 1.62 0.38
 -13 2 -6 0.61 0.27
 13 2 6 0.25 0.12
 13 2 6 0.09 0.1
 13 2 6 0.13 0.16
 -13 -2 -6 0.25 0.19
 -13 -2 -6 0.2 0.14
 13 -2 6 0.36 0.19
 13 2 7 1.55 0.27
 -13 2 -7 1.62 0.34
 13 2 7 1.6 0.21
 13 -2 7 1.6 0.27
 -13 -2 -7 1.93 0.38
 13 -2 7 1.44 0.28
 13 2 8 2.05 0.24
 13 -2 8 1.99 0.27
 -13 -2 -8 1.54 0.32
 13 -2 8 1.61 0.21
 13 2 9 0.88 0.12
 13 -2 9 0.81 0.13
 13 -2 9 0.83 0.11
 13 -3 -9 0.09 0.1
 -13 -3 9 0.03 0.12
 -13 3 8 0 0.36
 13 -3 -8 0.22 0.14
 -13 -3 8 -0.03 0.11
 -13 3 7 -0.06 0.22
 -13 3 7 0 0.07
 -13 -3 7 0.06 0.14
 13 -3 -7 0.43 0.21
 13 -3 -7 -0.02 0.09
 -13 3 6 4.34 0.72
 -13 3 6 4.32 0.34
 13 -3 -6 4.95 0.4
 13 -3 -6 4.63 0.45
 -13 -3 6 4.26 0.39
 13 3 -5 0.52 0.14
 -13 3 5 0.85 0.37
 13 -3 -5 0.51 0.18
 13 -3 -5 0.86 0.24
 -13 -3 5 0.85 0.21
 -13 3 4 6.38 0.9
 13 3 -4 6.55 0.46
 -13 -3 4 6.86 0.91
 -13 -3 4 6.7 0.51
 13 -3 -4 6.65 0.49
 13 3 -3 0.13 0.14
 -13 3 3 0.14 0.36
 -13 -3 3 0.3 0.31
 13 -3 -3 0.03 0.14
 -13 -3 3 -0.04 0.15
 -13 3 2 29.17 1.88
 13 3 -2 27.7 1.4
 -13 -3 2 27.53 1.94
 -13 -3 2 26.23 1.35
 13 3 -1 10.2 0.66
 -13 3 1 10.12 1.06
 -13 3 1 9.93 1.06
 13 3 0 1.89 0.28
 -13 3 0 0.99 0.46
 -13 -3 0 1.93 0.61
 -13 3 -1 8.39 0.91
 13 3 1 7.37 0.56
 -13 -3 -1 7.97 0.55
 13 3 2 2.38 0.33
 13 3 2 2.51 0.3
 -13 3 -2 3.06 0.47
 -13 -3 -2 2.82 0.35
 13 3 3 -0.07 0.15
 13 3 3 -0.05 0.16
 -13 3 -3 -0.13 0.24
 -13 -3 -3 0.2 0.22
 -13 3 -4 0.67 0.25
 13 3 4 0.59 0.21
 13 3 4 0.54 0.16
 -13 -3 -4 0.88 0.26
 -13 -3 -4 0.65 0.2
 -13 -3 -4 0.56 0.31
 -13 3 -5 0.07 0.18
 13 3 5 -0.06 0.1
 13 3 5 -0.17 0.14
 13 -3 5 -0.11 0.24
 -13 -3 -5 -0.19 0.1
 -13 -3 -5 0.24 0.14
 -13 -3 -5 -0.03 0.16
 13 3 6 0.3 0.13
 13 3 6 0.35 0.16
 -13 3 -6 -0.02 0.25
 -13 -3 -6 0.01 0.14
 13 -3 6 -0.1 0.18
 -13 -3 -6 0.34 0.27
 13 3 7 0.04 0.11
 13 -3 7 0.05 0.16
 -13 -3 -7 0.09 0.14
 -13 -3 -7 0.58 0.22
 13 3 8 0.12 0.1
 13 -3 8 0.28 0.16
 13 -3 8 -0.07 0.11
 -13 -3 -8 0.14 0.21
 13 -4 -9 0.13 0.1
 -13 4 8 -0.19 0.3
 -13 -4 8 0.72 0.14
 13 -4 -8 0.62 0.18
 -13 4 7 3.32 0.65
 13 -4 -7 4.26 0.33
 -13 -4 7 4.59 0.38
 -13 4 6 2.34 0.59
 13 -4 -6 1.69 0.25
 -13 -4 6 2.3 0.29
 13 -4 -6 2.12 0.32
 -13 4 5 2.8 0.62
 13 -4 -5 3.46 0.38
 -13 -4 5 3.73 0.4
 13 -4 -5 3.99 0.49
 -13 4 4 5.19 0.81
 13 4 -4 5.43 0.31
 -13 -4 4 6.14 0.9
 13 -4 -4 5.69 0.52
 -13 -4 4 5.91 0.51
 -13 4 3 8.39 1.04
 13 4 -3 7.48 0.47
 -13 -4 3 8.32 0.59
 13 -4 -3 7.57 0.58
 -13 -4 3 6.93 0.93
 -13 4 2 0.93 0.46
 13 4 -2 1.09 0.19
 -13 -4 2 1.6 0.29
 13 4 -1 1.07 0.21
 -13 -4 1 1.02 0.22
 13 4 0 0.45 0.18
 -13 -4 0 0.18 0.21
 13 4 1 0.19 0.17
 -13 4 -1 0.02 0.24
 -13 -4 -1 0.56 0.27
 13 4 2 0.51 0.17
 -13 4 -2 0.33 0.29
 -13 -4 -2 0.62 0.27
 13 4 3 0.28 0.14
 -13 4 -3 0.28 0.26
 -13 -4 -3 0.21 0.27
 13 4 4 1.08 0.23
 -13 4 -4 1.01 0.33
 -13 -4 -4 0.93 0.29
 -13 -4 -4 1.07 0.3
 13 4 5 1.85 0.27
 -13 4 -5 1.97 0.39
 -13 -4 -5 1.8 0.29
 -13 -4 -5 2.06 0.35
 -13 -4 -5 1.74 0.4
 -13 4 -6 0.82 0.29
 13 4 6 0.53 0.16
 13 -4 6 1.37 0.28
 -13 -4 -6 0.56 0.17
 -13 -4 -6 0.8 0.29
 13 4 7 -0.03 0.09
 -13 -4 -7 0.15 0.13
 13 -4 7 0.2 0.16
 -13 -4 -7 0.41 0.24
 13 -4 8 0.58 0.14
 13 -4 8 0.22 0.16
 -13 -4 -8 0.18 0.21
 13 -5 -8 1.31 0.23
 -13 -5 8 1.62 0.19
 -13 5 7 1.69 0.42
 13 -5 -7 2.28 0.25
 -13 -5 7 2.39 0.27
 -13 -5 7 2.63 0.28
 -13 5 6 6.79 0.95
 13 -5 -6 8.31 0.53
 13 -5 -6 7.58 0.6
 -13 -5 6 8.54 0.56
 -13 5 5 3.96 0.74
 13 -5 -5 4.54 0.45
 -13 -5 5 6.62 0.52
 -13 5 4 12.38 1.27
 -13 -5 4 11.76 0.74
 -13 -5 4 11.05 1.26
 13 -5 -4 10.75 0.73
 -13 5 3 1.99 0.56
 -13 -5 3 2.44 0.35
 -13 5 2 1.31 0.46
 13 5 -1 0.8 0.12
 -13 -5 1 1.29 0.24
 -13 5 0 0.33 0.11
 13 5 0 0.05 0.1
 -13 5 0 0.19 0.18
 -13 -5 0 0.78 0.27
 -13 5 -1 1.21 0.35
 13 5 1 1.27 0.18
 -13 5 -1 1.32 0.19
 -13 -5 -1 1.31 0.33
 -13 5 -2 2.62 0.29
 13 5 2 2.36 0.27
 -13 5 -2 2.72 0.43
 -13 -5 -2 2.55 0.41
 13 5 3 0.07 0.12
 -13 5 -3 0.18 0.12
 -13 5 -3 0.28 0.27
 -13 -5 -3 0.38 0.31
 13 5 4 0.8 0.16
 -13 5 -4 0.73 0.17
 -13 5 -4 0.44 0.29
 -13 -5 -4 1.04 0.34
 -13 -5 -4 0.67 0.28
 -13 5 -5 0.45 0.15
 -13 5 -5 0.64 0.24
 13 5 5 0.5 0.13
 -13 -5 -5 0.82 0.25
 -13 -5 -5 1.29 0.33
 13 5 6 0.51 0.1
 -13 -5 -6 0.56 0.21
 -13 -5 -6 1.02 0.3
 -13 -5 -6 0.44 0.15
 -13 -5 -7 0.16 0.21
 -13 -5 -7 0.2 0.16
 13 -5 7 0.48 0.19
 13 -5 8 0.74 0.16
 -13 -5 -8 1.07 0.24
 -13 -6 8 0.41 0.13
 -13 6 7 0.01 0.31
 -13 -6 7 0.22 0.17
 13 -6 -7 0.02 0.13
 -13 -6 7 0.1 0.13
 -13 6 6 3.67 0.65
 -13 -6 6 1.37 0.24
 13 -6 -6 1.87 0.25
 13 -6 -6 1.74 0.29
 -13 6 5 2.63 0.57
 13 -6 -5 2.47 0.33
 -13 -6 5 2.37 0.33
 -13 6 4 4.75 0.79
 -13 -6 4 5.09 0.84
 -13 6 3 8.8 1.07
 -13 6 2 2.37 0.62
 -13 6 2 3.22 0.32
 -13 6 1 2.99 0.31
 -13 6 1 3.26 0.46
 -13 6 0 0.02 0.09
 -13 6 0 0 0.16
 -13 6 -1 0.05 0.24
 -13 6 -1 -0.06 0.11
 -13 -6 -1 -0.39 0.27
 -13 6 -2 0.19 0.12
 -13 6 -2 0.35 0.25
 -13 -6 -2 -0.15 0.3
 -13 6 -3 -0.28 0.2
 -13 6 -3 -0.1 0.1
 -13 -6 -3 0.56 0.34
 -13 6 -4 -0.06 0.09
 -13 6 -4 0.2 0.22
 -13 -6 -4 0.08 0.32
 -13 6 -5 0.02 0.1
 -13 6 -5 -0.02 0.22
 -13 -6 -5 0.37 0.33
 -13 -6 -5 -0.02 0.16
 -13 6 -6 2.08 0.24
 -13 -6 -6 1.51 0.22
 -13 -6 -6 1.82 0.29
 -13 -6 -6 1.38 0.28
 -13 6 -7 -0.04 0.09
 -13 -6 -7 -0.05 0.13
 -13 -6 -7 -0.03 0.16
 13 -6 7 0.05 0.21
 -13 -7 7 0.03 0.11
 -13 -7 7 -0.1 0.12
 13 -7 -7 -0.13 0.08
 -13 7 6 0.12 0.32
 -13 -7 6 -0.04 0.13
 13 -7 -6 -0.08 0.15
 13 -7 -6 0.17 0.19
 -13 7 5 0.61 0.34
 -13 -7 5 0.7 0.22
 13 -7 -5 0.24 0.19
 -13 7 4 3.56 0.67
 -13 -7 4 3.54 0.68
 -13 7 3 1.62 0.51
 -13 7 3 1.13 0.2
 -13 7 2 5.83 0.41
 -13 7 1 0.44 0.28
 -13 7 1 0.24 0.13
 -13 7 0 2.26 0.26
 -13 7 0 1.76 0.36
 -13 7 -1 0.09 0.1
 -13 7 -1 -0.31 0.18
 -13 7 -2 0.28 0.24
 -13 7 -2 0.72 0.16
 -13 -7 -2 0.7 0.33
 -13 7 -3 0.11 0.23
 -13 7 -3 0.01 0.1
 -13 -7 -3 0.15 0.31
 -13 7 -4 5.59 0.38
 -13 7 -4 5.06 0.58
 -13 -7 -4 6.1 0.56
 -13 -7 -5 0.66 0.3
 -13 -7 -5 -0.05 0.12
 -13 7 -6 1.51 0.19
 -13 -7 -6 1.38 0.23
 -13 -7 -6 1.82 0.32
 -13 7 -7 0.27 0.11
 -13 -7 -7 0.49 0.15
 -13 -7 -7 0.34 0.19
 -13 -8 7 0.16 0.12
 13 -8 -7 0.06 0.08
 -13 -8 6 -0.18 0.13
 13 -8 -6 0.04 0.12
 -13 8 5 0.02 0.33
 13 -8 -5 0.73 0.2
 -13 8 4 0.06 0.11
 -13 8 4 0.12 0.35
 -13 -8 4 0.27 0.27
 -13 8 3 0.17 0.12
 -13 8 3 -0.19 0.34
 -13 8 2 0.11 0.1
 -13 8 2 0.3 0.23
 -13 8 1 1.72 0.22
 -13 8 1 1.54 0.36
 -13 8 0 0.68 0.15
 -13 8 0 0.9 0.31
 -13 8 -1 1.83 0.23
 -13 8 -1 1.92 0.39
 -13 8 -2 -0.03 0.08
 -13 8 -2 0.03 0.21
 -13 -8 -2 -0.15 0.3
 -13 8 -3 0.49 0.12
 -13 8 -3 0.51 0.26
 -13 -8 -3 0.61 0.35
 -13 8 -4 0.81 0.26
 -13 8 -4 0.67 0.14
 -13 -8 -4 0.64 0.34
 -13 8 -5 0.63 0.13
 -13 -8 -5 0.57 0.32
 -13 -8 -5 0.42 0.21
 -13 8 -6 0.1 0.09
 -13 -8 -6 -0.07 0.16
 -13 -8 -6 -0.06 0.13
 13 9 -6 0.41 0.13
 -13 -9 6 0.55 0.14
 13 -9 -6 0.56 0.16
 13 9 -5 -0.05 0.09
 -13 9 5 0 0.09
 13 -9 -5 -0.23 0.12
 13 9 -4 1.66 0.21
 -13 9 4 1.83 0.21
 -13 -9 4 0.81 0.41
 13 9 -3 0.35 0.11
 -13 9 3 0.68 0.24
 -13 9 3 0.41 0.12
 13 9 -2 1.12 0.18
 -13 9 2 1.38 0.19
 -13 9 2 1.23 0.31
 13 9 -1 8.61 0.52
 -13 9 1 9.38 0.76
 -13 9 1 8.56 0.49
 -13 9 0 4.21 0.54
 -13 9 0 5.46 0.36
 13 9 0 5.68 0.46
 -13 9 -1 0.14 0.22
 -13 9 -1 -0.03 0.09
 -13 9 -2 0.17 0.22
 -13 9 -2 0.3 0.11
 -13 -9 -2 0.24 0.3
 -13 9 -3 0.25 0.19
 -13 9 -3 0.03 0.07
 -13 -9 -3 -0.32 0.36
 -13 9 -4 -0.07 0.08
 -13 -9 -4 -0.13 0.33
 -13 9 -5 0.37 0.09
 -13 -9 -5 0.62 0.25
 -13 -9 -5 0.64 0.21
 -13 10 5 0.07 0.08
 13 10 -5 0 0.09
 13 -10 -5 -0.05 0.12
 -13 10 4 -0.04 0.08
 13 10 -4 0.11 0.11
 -13 10 4 -0.02 0.14
 -13 10 3 0.79 0.13
 13 10 -3 0.71 0.14
 -13 10 3 0.4 0.2
 -13 -10 3 0.12 0.39
 13 10 -2 0.24 0.11
 -13 10 2 0.42 0.17
 -13 10 2 0.61 0.13
 -13 10 1 1.07 0.16
 -13 10 1 0.92 0.25
 13 10 -1 1.12 0.19
 -13 10 0 0.15 0.2
 13 10 0 0 0.15
 -13 10 0 0.37 0.12
 13 10 1 1.19 0.27
 -13 10 -1 0.86 0.26
 -13 10 -1 0.91 0.14
 -13 10 -2 1.21 0.16
 -13 10 -2 1.32 0.28
 -13 -10 -2 1.16 0.29
 -13 10 -3 0.11 0.17
 -13 10 -3 0.49 0.1
 -13 -10 -3 0.56 0.26
 -13 10 -4 5.32 0.31
 -13 -10 -4 5.69 0.42
 -13 11 3 -0.06 0.06
 13 11 -3 0.12 0.08
 -13 11 3 -0.04 0.14
 -13 11 2 1.02 0.22
 13 11 -2 0.96 0.14
 -13 11 2 1.21 0.14
 -13 11 1 0.71 0.11
 13 11 -1 0.25 0.09
 -13 11 1 0.27 0.15
 13 11 0 0.93 0.16
 -13 11 0 0.94 0.23
 -13 11 0 0.61 0.12
 -13 11 -1 0.18 0.08
 -13 11 -1 0.06 0.1
 13 11 1 -0.04 0.12
 -13 11 -2 1.3 0.22
 -13 11 -2 1.28 0.14
 -13 -11 -2 1.4 0.22
 -13 11 -3 0.09 0.06
 -13 -11 -3 0.16 0.15
 -14 0 9 -0.07 0.07
 14 0 -8 -0.08 0.07
 -14 0 8 0.04 0.13
 14 0 -7 -0.04 0.1
 -14 0 7 -0.17 0.23
 -14 0 6 4.96 0.77
 14 0 -6 3.74 0.41
 14 0 -5 0 0.15
 -14 0 5 -0.39 0.27
 -14 0 5 0.02 0.1
 14 0 -5 -0.15 0.13
 -14 0 4 3.95 0.75
 14 0 -4 4.36 0.33
 14 0 -4 4.34 0.5
 -14 0 4 4.02 0.32
 14 0 -4 4.65 0.44
 14 0 -3 -0.11 0.18
 14 0 -3 0.24 0.23
 -14 0 3 0.22 0.27
 14 0 -3 0.05 0.14
 -14 0 3 0.16 0.12
 14 0 -2 12.79 0.81
 -14 0 2 12.45 0.65
 -14 0 2 13.17 1.29
 14 0 -2 12.4 0.72
 14 0 -1 0.02 0.19
 -14 0 1 0.08 0.12
 -14 0 1 -0.16 0.33
 -14 0 0 0.39 0.42
 14 0 0 0.05 0.17
 14 0 1 0.05 0.17
 14 0 2 0.2 0.17
 14 0 2 0.13 0.24
 -14 0 -3 0.04 0.25
 14 0 3 0.09 0.16
 14 0 3 -0.08 0.22
 14 0 4 3.26 0.43
 14 0 4 4.32 0.39
 -14 0 -4 4.53 0.6
 14 0 5 -0.22 0.18
 -14 0 -5 -0.04 0.24
 14 0 5 0.08 0.15
 14 0 6 0.83 0.19
 -14 0 -6 0.89 0.26
 14 0 6 0.28 0.19
 -14 0 -7 -0.17 0.19
 14 0 7 -0.09 0.17
 14 0 7 0.02 0.11
 14 0 7 -0.1 0.13
 14 0 8 3.46 0.34
 -14 0 -8 2.33 0.34
 14 0 8 3.43 0.27
 -14 -1 9 -0.03 0.06
 -14 1 8 0.47 0.12
 14 -1 -8 0.31 0.12
 -14 1 7 0.99 0.35
 14 1 -7 0.22 0.11
 14 -1 -7 0.66 0.18
 -14 -1 7 0.16 0.33
 14 1 -6 1.65 0.25
 -14 1 6 2.12 0.51
 14 -1 -6 1.95 0.31
 -14 -1 6 2.43 0.55
 -14 -1 6 1.55 0.21
 14 -1 -6 1.87 0.25
 -14 1 5 0.17 0.36
 14 1 -5 0.34 0.17
 14 -1 -5 0.16 0.18
 -14 -1 5 0.14 0.12
 14 -1 -5 0.03 0.16
 14 -1 -5 -0.02 0.12
 -14 -1 5 -0.02 0.11
 -14 -1 5 0.28 0.31
 14 1 -4 -0.02 0.16
 -14 1 4 0.24 0.34
 14 1 -4 0 0.12
 -14 -1 4 0.33 0.38
 14 -1 -4 -0.03 0.16
 -14 -1 4 -0.02 0.11
 14 -1 -4 -0.41 0.16
 14 -1 -4 0.22 0.23
 14 1 -3 4.09 0.44
 14 1 -3 3.7 0.37
 14 1 -3 3.67 0.3
 -14 1 3 4 0.71
 14 -1 -3 3.75 0.37
 14 -1 -3 3.51 0.43
 -14 -1 3 3.58 0.35
 -14 -1 3 3.4 0.66
 -14 1 2 2.33 0.61
 14 1 -2 2.63 0.33
 14 1 -2 2.1 0.34
 14 1 -2 2.43 0.27
 14 -1 -2 2.65 0.31
 -14 -1 2 3.39 0.67
 -14 -1 2 2.41 0.27
 14 1 -1 1.63 0.29
 -14 1 1 1.88 0.56
 14 1 -1 2.08 0.24
 -14 -1 1 1.84 0.54
 14 -1 -1 1.89 0.29
 -14 -1 1 1.51 0.22
 14 1 0 2.27 0.28
 14 1 0 2.71 0.39
 -14 -1 0 2.14 0.59
 14 -1 0 2.4 0.32
 -14 -1 0 2.25 0.25
 14 1 1 0.27 0.18
 14 1 1 0.01 0.18
 14 1 1 -0.08 0.13
 -14 -1 -1 0.16 0.11
 14 -1 1 0.02 0.14
 -14 1 -2 10.79 0.8
 14 1 2 9.01 0.64
 14 1 2 8.38 0.56
 -14 -1 -2 8.97 0.49
 14 -1 2 8.49 0.6
 -14 1 -3 3.2 0.5
 14 1 3 2.04 0.27
 14 1 3 2 0.37
 14 1 3 1.86 0.31
 -14 -1 -3 2.44 0.47
 14 -1 3 2.68 0.33
 14 1 4 0 0.17
 14 1 4 0.17 0.17
 14 1 4 -0.15 0.15
 -14 1 -4 -0.11 0.21
 14 -1 4 -0.37 0.15
 -14 -1 -4 -0.05 0.16
 14 -1 4 0.03 0.16
 14 1 5 1.18 0.26
 14 1 5 0.95 0.18
 -14 1 -5 1.03 0.33
 14 1 5 0.81 0.21
 14 -1 5 1.03 0.22
 14 -1 5 0.94 0.25
 -14 -1 -5 0.43 0.24
 14 1 6 7.75 0.56
 14 1 6 8.18 0.63
 -14 1 -6 8.2 0.73
 14 1 6 8.43 0.47
 14 -1 6 8.48 0.62
 -14 -1 -6 7.41 0.75
 14 -1 6 8.1 0.52
 14 1 7 0.58 0.16
 -14 1 -7 0.41 0.25
 14 1 7 0.5 0.16
 14 -1 7 0.78 0.16
 -14 -1 -7 0.68 0.26
 14 -1 7 0.29 0.2
 14 1 8 0.55 0.14
 14 1 8 0.35 0.08
 -14 -1 -8 0.56 0.21
 14 -1 8 0.57 0.13
 14 -1 8 0.52 0.11
 -14 -2 9 -0.14 0.1
 14 -2 -8 -0.03 0.09
 -14 2 7 1.11 0.42
 -14 2 7 0.33 0.12
 -14 -2 7 0.6 0.14
 14 -2 -7 0.39 0.16
 14 2 -6 5.13 0.36
 -14 2 6 3.94 0.68
 14 -2 -6 5.52 0.44
 14 -2 -6 4.77 0.34
 -14 -2 6 5.24 0.39
 -14 -2 6 4.7 0.77
 14 -2 -6 5.03 0.5
 14 2 -5 0.16 0.13
 -14 2 5 -0.3 0.34
 -14 -2 5 0.04 0.13
 14 -2 -5 0.13 0.13
 -14 -2 5 -0.54 0.28
 14 -2 -5 0.05 0.18
 -14 2 4 4.74 0.81
 14 2 -4 5.03 0.45
 14 -2 -4 5.2 0.44
 14 -2 -4 5.15 0.52
 -14 -2 4 4.98 0.43
 -14 -2 4 4.33 0.8
 14 2 -3 0.12 0.17
 14 2 -3 0.22 0.15
 -14 2 3 0.3 0.32
 -14 -2 3 0.18 0.15
 14 -2 -3 0.01 0.18
 14 -2 -3 0.24 0.2
 -14 -2 3 -0.14 0.31
 -14 2 2 7.17 0.93
 14 2 -2 7.39 0.55
 14 2 -2 6.17 0.47
 14 -2 -2 7.08 0.53
 -14 -2 2 6.38 0.47
 -14 -2 2 7.48 0.98
 14 2 -1 0.21 0.19
 14 2 -1 0.23 0.2
 -14 2 1 0.36 0.39
 14 2 -1 0.41 0.15
 -14 -2 1 0.41 0.32
 14 -2 -1 0.48 0.25
 -14 -2 1 0.39 0.17
 14 2 0 4.05 0.33
 14 2 0 4.89 0.43
 14 2 0 4.99 0.47
 14 -2 0 5.04 0.45
 -14 -2 0 4.75 0.4
 -14 -2 0 5.34 0.82
 14 2 1 11.84 0.77
 14 2 1 11.25 0.61
 14 2 1 12.38 0.72
 14 -2 1 10.89 0.73
 -14 -2 -1 10.88 0.65
 -14 2 -2 0.16 0.19
 14 2 2 0.32 0.16
 14 2 2 0.36 0.16
 14 2 2 0.4 0.18
 14 -2 2 0.06 0.23
 -14 -2 -2 0.09 0.15
 14 2 3 2.4 0.31
 -14 2 -3 2.39 0.42
 14 2 3 1.63 0.29
 14 2 3 2.4 0.26
 14 -2 3 2.56 0.35
 -14 -2 -3 2.52 0.46
 -14 -2 -3 2.35 0.25
 -14 -2 -3 2.14 0.35
 14 2 4 5.75 0.55
 -14 2 -4 4.86 0.63
 14 2 4 5.14 0.45
 14 2 4 5.36 0.36
 -14 -2 -4 5.18 0.5
 14 -2 4 4.87 0.48
 -14 -2 -4 5.31 0.63
 14 2 5 0.35 0.16
 -14 2 -5 0.96 0.33
 14 2 5 1.13 0.26
 14 2 5 0.72 0.15
 14 -2 5 0.79 0.22
 -14 -2 -5 0.69 0.31
 -14 -2 -5 0.67 0.19
 14 2 6 2.46 0.27
 14 2 6 3.66 0.39
 -14 2 -6 3.06 0.45
 14 -2 6 2.69 0.33
 -14 -2 -6 2.48 0.41
 14 -2 6 2.74 0.38
 14 2 7 3.04 0.22
 -14 2 -7 2.67 0.39
 14 2 7 2.65 0.32
 14 -2 7 3.06 0.29
 -14 -2 -7 2.35 0.39
 14 -2 7 3.07 0.35
 14 2 8 0.12 0.11
 14 -2 8 0.25 0.13
 14 -2 8 0.42 0.12
 -14 -2 -8 0.23 0.2
 -14 -3 8 0.94 0.12
 14 -3 -8 1.26 0.2
 -14 3 7 0.23 0.36
 14 -3 -7 0.14 0.17
 -14 -3 7 0.02 0.12
 -14 3 6 0.58 0.41
 -14 3 6 -0.14 0.06
 14 -3 -6 0.26 0.15
 -14 -3 6 -0.01 0.14
 -14 -3 6 -0.25 0.34
 -14 -3 6 -0.11 0.11
 14 -3 -6 0.02 0.11
 14 -3 -6 0.01 0.13
 -14 3 5 0.16 0.33
 14 3 -5 0.06 0.1
 14 -3 -5 -0.13 0.13
 -14 -3 5 -0.04 0.23
 14 -3 -5 0.17 0.22
 -14 -3 5 0.04 0.13
 14 3 -4 0.54 0.15
 -14 3 4 0.04 0.43
 14 -3 -4 1.2 0.29
 -14 -3 4 1.13 0.22
 -14 -3 4 0.53 0.39
 14 -3 -4 0.69 0.2
 14 3 -3 7.76 0.53
 -14 3 3 7.62 0.96
 14 -3 -3 7.2 0.56
 -14 -3 3 7.85 1.02
 -14 -3 3 7.54 0.53
 14 3 -2 2.81 0.33
 -14 3 2 2.42 0.58
 -14 -3 2 2.46 0.58
 14 -3 -2 3.5 0.4
 -14 -3 2 3.16 0.34
 14 3 -1 0.16 0.13
 14 3 -1 0.05 0.12
 -14 3 1 0.03 0.37
 -14 -3 1 -0.13 0.39
 -14 -3 1 0.1 0.17
 14 -3 -1 0.04 0.25
 14 3 0 9.61 0.66
 14 3 0 10.04 0.61
 -14 -3 0 10.59 0.64
 -14 3 -1 0.68 0.25
 14 3 1 -0.04 0.13
 14 3 1 0.4 0.18
 -14 -3 -1 0.09 0.15
 -14 3 -2 16.59 1.14
 14 3 2 15.14 0.89
 14 3 2 14.6 0.83
 -14 -3 -2 15.99 0.84
 14 3 3 0.03 0.11
 14 3 3 -0.04 0.15
 -14 3 -3 -0.05 0.17
 -14 -3 -3 0.21 0.22
 -14 -3 -3 0.04 0.13
 14 3 4 0.53 0.18
 14 3 4 0.26 0.12
 -14 3 -4 0.33 0.29
 -14 -3 -4 0.36 0.13
 -14 -3 -4 0.61 0.2
 -14 -3 -4 0.31 0.26
 14 -3 4 0.59 0.26
 14 3 5 -0.03 0.09
 14 3 5 -0.05 0.13
 -14 3 -5 0.53 0.28
 -14 -3 -5 0.1 0.24
 14 -3 5 -0.15 0.19
 -14 -3 -5 0.03 0.14
 -14 3 -6 1.75 0.36
 14 3 6 1.44 0.23
 -14 -3 -6 1.7 0.26
 -14 -3 -6 1.96 0.38
 14 -3 6 1.32 0.28
 -14 3 -7 0.76 0.24
 14 3 7 0.54 0.15
 -14 -3 -7 0.94 0.28
 14 -3 7 0.73 0.21
 14 -3 7 0.56 0.16
 14 3 8 -0.01 0.07
 14 -3 8 0.06 0.12
 14 -3 8 0.15 0.11
 -14 -3 -8 0.05 0.17
 14 -4 -8 0 0.13
 -14 -4 8 0.01 0.08
 -14 4 7 1.09 0.43
 14 -4 -7 0.88 0.24
 14 -4 -7 1.02 0.14
 -14 -4 7 1.08 0.19
 -14 4 6 1.39 0.48
 14 -4 -6 1.61 0.26
 -14 -4 6 1.53 0.23
 14 -4 -6 1.54 0.23
 -14 4 5 1.98 0.55
 -14 -4 5 1.7 0.55
 14 -4 -5 2.1 0.28
 14 -4 -5 1.78 0.34
 -14 -4 5 1.95 0.27
 -14 4 4 0.31 0.27
 14 -4 -4 0.51 0.21
 -14 -4 4 0.01 0.26
 -14 -4 4 0.46 0.19
 14 4 -3 0.22 0.11
 -14 4 3 -0.03 0.22
 -14 -4 3 0.26 0.33
 14 -4 -3 0.11 0.17
 -14 -4 3 0.19 0.18
 14 4 -2 -0.08 0.1
 -14 4 2 0.03 0.35
 -14 -4 2 0.3 0.42
 -14 -4 2 -0.07 0.18
 14 4 -1 3.36 0.34
 -14 -4 1 4.25 0.42
 14 4 0 13.56 0.79
 -14 4 0 15.38 1.01
 -14 -4 0 13.44 0.8
 14 4 1 18.29 0.97
 -14 4 -1 18.42 1.22
 -14 -4 -1 16.74 0.95
 -14 4 -2 2.4 0.44
 14 4 2 1.9 0.28
 -14 -4 -2 2.27 0.31
 -14 4 -3 2.17 0.38
 14 4 3 2.49 0.3
 -14 -4 -3 2.06 0.3
 -14 4 -4 3.52 0.5
 14 4 4 2.76 0.31
 -14 -4 -4 2.56 0.4
 -14 -4 -4 2.34 0.28
 -14 -4 -4 2.99 0.47
 -14 4 -5 0.61 0.27
 14 4 5 0.72 0.18
 -14 -4 -5 0.72 0.28
 -14 -4 -5 0.6 0.23
 -14 -4 -5 0.49 0.13
 14 -4 5 0.61 0.26
 14 4 6 1.9 0.22
 -14 4 -6 1.9 0.35
 -14 -4 -6 2.26 0.3
 -14 -4 -6 1.77 0.33
 14 -4 6 2.85 0.33
 14 4 7 1.28 0.13
 14 -4 7 1.9 0.24
 -14 -4 -7 1.5 0.31
 -14 -4 -8 1.18 0.24
 14 -4 8 1.2 0.16
 14 -4 8 0.65 0.18
 -14 -5 8 0.44 0.11
 14 -5 -8 0.59 0.16
 -14 5 7 0.21 0.29
 -14 -5 7 0.03 0.11
 14 -5 -7 0 0.09
 -14 5 6 1.33 0.46
 14 -5 -6 1.12 0.24
 14 -5 -6 1.3 0.21
 -14 -5 6 1.16 0.22
 -14 5 5 0.05 0.37
 14 -5 -5 0.35 0.23
 -14 -5 5 0.76 0.44
 -14 -5 5 0.52 0.2
 14 -5 -5 0.35 0.17
 -14 5 4 4.45 0.77
 14 -5 -4 5.24 0.49
 -14 -5 4 5.04 0.46
 -14 -5 4 5.37 0.83
 -14 5 3 2.56 0.61
 -14 -5 3 3.41 0.66
 -14 -5 3 3.71 0.4
 14 -5 -3 3.3 0.41
 -14 5 2 22.42 1.68
 -14 -5 2 22.83 1.19
 -14 -5 1 13.7 0.81
 -14 5 0 17.93 1.27
 14 5 0 18.93 0.92
 -14 -5 0 20.47 1.05
 -14 5 -1 5.73 0.63
 14 5 1 4.2 0.32
 -14 -5 -1 4.48 0.45
 -14 5 -2 0.54 0.28
 -14 5 -2 0.56 0.16
 14 5 2 0.42 0.14
 -14 -5 -2 0.65 0.28
 -14 5 -3 1.19 0.21
 14 5 3 0.95 0.16
 -14 5 -3 0.75 0.31
 -14 -5 -3 1.4 0.31
 -14 5 -4 3.96 0.53
 14 5 4 4.28 0.31
 -14 -5 -4 4.26 0.4
 -14 5 -5 0.33 0.24
 14 5 5 0.04 0.08
 -14 -5 -5 -0.17 0.18
 -14 -5 -5 0.16 0.14
 -14 -5 -5 0.29 0.23
 -14 5 -6 0.23 0.23
 -14 -5 -6 0.56 0.19
 -14 -5 -6 0.45 0.23
 14 -5 6 0.34 0.19
 14 -5 7 -0.07 0.12
 -14 -5 -7 -0.1 0.12
 -14 -5 -7 -0.02 0.18
 -14 -6 7 0.19 0.14
 14 -6 -7 0.19 0.11
 -14 6 6 0.22 0.33
 14 -6 -6 0.11 0.12
 -14 -6 6 0.37 0.15
 14 -6 -6 0.25 0.18
 -14 6 5 -0.26 0.29
 -14 -6 5 0.21 0.2
 14 -6 -5 -0.19 0.14
 -14 -6 5 -0.13 0.33
 -14 6 4 2.61 0.56
 14 -6 -4 2.53 0.35
 -14 -6 4 2.27 0.6
 -14 -6 4 2.74 0.34
 -14 6 3 4.16 0.76
 -14 -6 3 4.83 0.47
 -14 -6 3 5.67 0.89
 -14 6 2 7.57 0.98
 -14 -6 2 7.24 0.57
 -14 6 1 2.43 0.45
 -14 6 1 2.39 0.28
 -14 -6 1 3.13 0.35
 -14 6 0 0.2 0.13
 -14 6 0 -0.03 0.22
 -14 -6 0 0.67 0.22
 -14 6 -1 0.34 0.14
 -14 6 -1 0.28 0.24
 -14 -6 -1 -0.14 0.25
 -14 6 -2 1.3 0.34
 -14 6 -2 1.12 0.19
 -14 -6 -2 0.77 0.31
 -14 6 -3 4.45 0.37
 -14 6 -3 4.45 0.55
 -14 -6 -3 3.86 0.45
 -14 6 -4 -0.03 0.23
 -14 6 -4 -0.03 0.11
 -14 -6 -4 -0.19 0.22
 -14 6 -5 0.16 0.11
 -14 6 -5 0.15 0.22
 -14 -6 -5 0 0.17
 -14 -6 -5 0.32 0.22
 -14 6 -6 1.53 0.19
 -14 -6 -6 1.16 0.28
 -14 -6 -6 1.6 0.26
 -14 -6 -7 0.07 0.17
 14 -6 7 0.01 0.13
 14 -7 -7 0.34 0.1
 -14 -7 7 0.13 0.13
 -14 7 6 1.49 0.38
 14 -7 -6 2.14 0.29
 -14 -7 6 1.87 0.23
 14 -7 -6 1.77 0.21
 -14 7 5 -0.13 0.3
 -14 -7 5 0.3 0.38
 -14 -7 5 0.33 0.16
 14 -7 -5 0.2 0.19
 -14 7 4 -0.33 0.32
 14 -7 -4 -0.06 0.19
 -14 -7 4 0.26 0.39
 -14 -7 4 0.16 0.18
 -14 7 3 0.44 0.4
 -14 -7 3 0.15 0.27
 -14 -7 3 0.78 0.22
 -14 7 2 1.35 0.21
 -14 7 1 0.14 0.12
 -14 7 1 0.19 0.25
 -14 -7 1 0.5 0.23
 -14 7 0 5.39 0.64
 -14 7 0 6.31 0.42
 -14 -7 0 6.26 0.54
 -14 7 -1 1.59 0.22
 -14 7 -1 1.36 0.31
 -14 -7 -1 1.79 0.34
 -14 7 -2 -0.1 0.09
 -14 7 -2 0.09 0.16
 -14 -7 -2 -0.19 0.27
 -14 7 -3 0.34 0.25
 -14 7 -3 0.85 0.17
 -14 -7 -3 0.76 0.31
 -14 7 -4 0.28 0.12
 -14 7 -4 0.02 0.19
 -14 -7 -4 0.95 0.32
 -14 7 -5 0.03 0.09
 -14 7 -5 -0.01 0.18
 -14 -7 -5 -0.07 0.15
 -14 -7 -5 0.02 0.19
 -14 7 -6 0.64 0.13
 -14 -7 -6 0.8 0.2
 -14 -7 -6 0.78 0.23
 -14 -8 6 -0.15 0.1
 14 -8 -6 -0.01 0.1
 -14 8 5 0.44 0.3
 14 -8 -5 1.2 0.2
 -14 -8 5 1.49 0.22
 -14 8 4 1.71 0.48
 -14 -8 4 1.71 0.49
 -14 -8 4 2.1 0.27
 -14 8 3 0.52 0.34
 -14 8 3 0.19 0.12
 -14 -8 3 0.17 0.38
 -14 8 2 0.33 0.19
 -14 8 2 0.33 0.14
 -14 8 1 5.38 0.61
 -14 8 1 5.48 0.38
 -14 8 0 1.56 0.36
 -14 8 0 1.44 0.2
 -14 -8 0 1.67 0.28
 -14 8 -1 6.15 0.4
 -14 8 -1 5.14 0.59
 -14 -8 -1 6.41 0.53
 -14 8 -2 0.39 0.12
 -14 8 -2 0.42 0.25
 -14 -8 -2 0.27 0.27
 -14 8 -3 0.1 0.15
 -14 8 -3 0.12 0.08
 -14 -8 -3 0.01 0.26
 -14 8 -4 0.04 0.19
 -14 8 -4 0.06 0.08
 -14 -8 -4 0.19 0.21
 -14 8 -5 0.83 0.14
 -14 -8 -5 0.86 0.26
 -14 -8 -5 0.58 0.17
 -14 8 -6 0.15 0.08
 -14 -8 -6 0.34 0.19
 -14 -9 5 0.05 0.12
 14 -9 -5 0.17 0.12
 -14 9 4 0.48 0.12
 14 9 -4 0.91 0.16
 -14 -9 4 0.3 0.18
 -14 9 3 -0.14 0.08
 14 9 -3 -0.05 0.09
 -14 9 3 0.23 0.14
 -14 -9 3 -0.1 0.32
 -14 9 2 1.26 0.18
 -14 9 2 1.04 0.27
 14 9 -2 0.67 0.15
 -14 9 1 3.55 0.46
 -14 9 1 5.2 0.33
 -14 9 0 1.53 0.2
 -14 9 0 1.34 0.32
 -14 9 -1 0.05 0.15
 -14 9 -1 0.27 0.1
 -14 -9 -1 0.73 0.21
 -14 9 -2 0.09 0.18
 -14 9 -2 0.09 0.1
 -14 -9 -2 -0.12 0.27
 -14 9 -3 0.34 0.21
 -14 9 -3 0.08 0.09
 -14 -9 -3 0.32 0.22
 -14 9 -4 -0.04 0.07
 -14 -9 -4 0.16 0.2
 -14 9 -5 0.08 0.07
 -14 -9 -5 -0.14 0.09
 14 10 -4 0.11 0.09
 -14 10 4 0.27 0.15
 -14 10 4 -0.05 0.07
 -14 -10 4 0.08 0.13
 -14 10 3 0.3 0.17
 14 10 -3 0.51 0.12
 -14 10 3 0.23 0.09
 -14 10 2 0.49 0.2
 -14 10 2 1 0.14
 14 10 -2 0.53 0.12
 14 10 -1 0.48 0.12
 -14 10 1 0.48 0.12
 -14 10 1 0.22 0.2
 -14 10 0 0.03 0.16
 -14 10 0 0.02 0.08
 14 10 0 0.13 0.1
 -14 -10 0 0.23 0.15
 -14 10 -1 0.09 0.17
 -14 10 -1 0.14 0.09
 -14 -10 -1 -0.06 0.13
 -14 10 -2 0.02 0.17
 -14 10 -2 0.03 0.08
 -14 -10 -2 0.19 0.16
 -14 10 -3 0.51 0.19
 -14 10 -3 0.56 0.1
 -14 -10 -3 0.62 0.16
 -14 10 -4 0.95 0.12
 -14 -10 -4 1.01 0.16
 -14 11 2 0.17 0.13
 -14 11 2 0.02 0.06
 14 11 -2 0.07 0.09
 -14 11 1 1.16 0.13
 -14 11 1 0.73 0.2
 14 11 -1 1.06 0.14
 14 11 0 0.19 0.1
 -14 11 0 0.12 0.15
 -14 11 0 0.05 0.06
 -14 -11 0 0.34 0.14
 -14 11 -1 0.11 0.15
 -14 11 -1 -0.09 0.06
 -14 -11 -1 0.12 0.12
 -14 11 -2 1.64 0.15
 -14 -11 -2 1.76 0.2
 -15 0 8 1.59 0.18
 -15 0 7 0.11 0.25
 15 0 -7 0.1 0.1
 -15 0 6 0.44 0.36
 15 0 -6 0.57 0.17
 -15 0 5 -0.05 0.32
 15 0 -5 -0.1 0.14
 15 0 -5 -0.01 0.12
 15 0 -4 -0.02 0.18
 -15 0 4 0.08 0.33
 15 0 -4 0.02 0.1
 15 0 -4 0.38 0.2
 -15 0 3 -0.14 0.21
 15 0 -3 0 0.19
 15 0 -3 -0.11 0.15
 15 0 -3 0 0.14
 -15 0 2 5.13 0.78
 15 0 -2 3.96 0.42
 15 0 -2 3.52 0.46
 15 0 -2 3.56 0.34
 15 0 -1 -0.1 0.12
 -15 0 1 0.01 0.34
 15 0 -1 -0.04 0.13
 15 0 0 30.1 1.59
 15 0 0 31.6 1.46
 15 0 1 -0.14 0.15
 15 0 1 -0.26 0.13
 15 0 2 7.05 0.58
 15 0 2 6.27 0.47
 15 0 3 0.08 0.15
 -15 0 -3 -0.19 0.23
 15 0 3 -0.12 0.19
 15 0 4 5.54 0.53
 15 0 4 5.48 0.45
 -15 0 -4 6.05 0.66
 15 0 5 -0.12 0.11
 -15 0 -5 -0.11 0.22
 15 0 5 -0.09 0.19
 -15 0 -6 2.24 0.39
 15 0 6 2.52 0.25
 15 0 6 2.51 0.31
 -15 0 -7 0.05 0.2
 15 0 7 0.01 0.1
 15 0 7 -0.05 0.14
 15 0 8 0.34 0.08
 15 0 8 0.69 0.16
 -15 1 8 0.35 0.08
 15 -1 -8 0.33 0.1
 -15 -1 8 0.35 0.12
 -15 1 7 2.01 0.23
 -15 -1 7 2.87 0.58
 15 -1 -7 2.51 0.28
 15 1 -6 -0.05 0.11
 -15 1 6 0.09 0.27
 -15 -1 6 0.08 0.32
 15 -1 -6 0.24 0.17
 15 1 -5 2.5 0.31
 -15 1 5 2.45 0.61
 -15 -1 5 1.74 0.54
 15 -1 -5 2.41 0.36
 15 -1 -5 2.86 0.32
 -15 -1 5 2.36 0.25
 15 -1 -5 2.28 0.23
 -15 1 4 19.54 1.48
 15 1 -4 18.35 0.95
 15 1 -4 18.37 1.06
 15 -1 -4 18.46 1.05
 -15 -1 4 18.33 0.91
 15 -1 -4 19.97 1.15
 -15 -1 4 18.81 1.52
 15 -1 -4 17.9 0.92
 -15 -1 4 18.45 0.91
 15 1 -3 2 0.33
 15 1 -3 2.31 0.29
 -15 1 3 2.01 0.58
 -15 -1 3 2.68 0.58
 -15 -1 3 2.5 0.27
 15 -1 -3 2.73 0.32
 15 -1 -3 2.86 0.35
 -15 1 2 1.7 0.5
 15 1 -2 3.07 0.29
 15 1 -2 2.85 0.36
 15 1 -2 2.69 0.32
 15 -1 -2 2.78 0.32
 -15 -1 2 3.2 0.69
 -15 -1 2 2.49 0.27
 15 -1 -2 2.43 0.33
 -15 1 1 8.4 0.98
 15 1 -1 6.82 0.47
 15 1 -1 7.22 0.57
 15 1 -1 8.23 0.56
 15 -1 -1 7.5 0.61
 -15 -1 1 8.16 1.04
 15 -1 -1 7.2 0.53
 -15 -1 1 7.69 0.46
 15 1 0 18.25 1.02
 15 1 0 17.96 0.92
 15 1 0 18.21 1.07
 -15 -1 0 18.56 0.88
 15 -1 0 17.67 1.06
 15 -1 0 18.37 0.98
 -15 -1 0 18.88 1.47
 15 1 1 0.83 0.18
 15 1 1 0.74 0.23
 15 1 1 0.87 0.22
 15 -1 1 1.07 0.24
 15 -1 1 0.76 0.3
 -15 -1 -1 0.9 0.17
 15 1 2 1.74 0.24
 15 1 2 2.2 0.31
 15 1 2 1.76 0.31
 -15 1 -2 2.11 0.39
 15 -1 2 1.8 0.36
 15 -1 2 1.8 0.28
 15 1 3 0.09 0.15
 -15 1 -3 -0.46 0.21
 15 1 3 -0.01 0.15
 15 1 3 -0.3 0.19
 15 -1 3 -0.01 0.15
 15 -1 3 -0.15 0.15
 -15 -1 -3 0.4 0.28
 15 1 4 1.71 0.28
 15 1 4 2.05 0.24
 15 1 4 1.41 0.29
 -15 1 -4 1.67 0.39
 15 -1 4 1.34 0.25
 -15 -1 -4 1.87 0.37
 15 -1 4 1.78 0.3
 -15 1 -5 0.33 0.27
 15 1 5 0.8 0.26
 15 1 5 0.47 0.15
 15 1 5 0.17 0.18
 -15 -1 -5 0.06 0.24
 15 -1 5 0.26 0.22
 15 -1 5 0.38 0.16
 -15 1 -6 0.37 0.25
 15 1 6 0.35 0.13
 15 1 6 0.39 0.15
 15 -1 6 0.19 0.16
 -15 -1 -6 0.28 0.24
 15 -1 6 0.21 0.13
 -15 1 -7 0.09 0.2
 15 1 7 0.16 0.13
 15 1 7 0.25 0.1
 15 -1 7 0.25 0.13
 -15 -1 -7 0.05 0.18
 15 -1 7 0.34 0.12
 15 1 8 0.32 0.12
 15 -1 8 0.13 0.08
 15 -1 8 0.18 0.13
 -15 -1 -8 0.19 0.16
 15 -2 -8 0.27 0.11
 -15 2 7 0.88 0.4
 -15 2 7 0.82 0.1
 15 -2 -7 0.9 0.19
 -15 -2 7 0.75 0.39
 -15 2 6 0.65 0.39
 15 2 -6 0.63 0.11
 -15 -2 6 0.58 0.14
 -15 -2 6 0.5 0.36
 15 -2 -6 0.68 0.19
 15 -2 -6 0.91 0.24
 15 2 -5 1.18 0.21
 -15 2 5 1.89 0.54
 15 -2 -5 1.67 0.28
 15 -2 -5 1.55 0.21
 -15 -2 5 1.45 0.22
 -15 -2 5 1.56 0.23
 -15 -2 5 1.32 0.5
 15 -2 -5 2.11 0.36
 15 2 -4 1.17 0.22
 -15 2 4 1.77 0.55
 -15 -2 4 1.36 0.22
 15 -2 -4 1.44 0.23
 15 -2 -4 1.38 0.28
 -15 -2 4 1.29 0.5
 15 2 -3 1.86 0.2
 15 2 -3 1.44 0.26
 -15 2 3 1.87 0.55
 -15 -2 3 1.72 0.24
 15 -2 -3 2.44 0.37
 -15 -2 3 1.84 0.57
 15 -2 -3 2.05 0.27
 -15 2 2 2.75 0.61
 15 2 -2 2.44 0.27
 15 2 -2 2.42 0.32
 15 -2 -2 2.45 0.37
 -15 -2 2 2.1 0.55
 -15 -2 2 2.94 0.31
 15 -2 -2 2.47 0.32
 -15 2 1 11.26 1.15
 15 2 -1 10.13 0.69
 15 2 -1 10.02 0.63
 15 -2 -1 9.7 0.65
 -15 -2 1 11.43 1.2
 -15 -2 1 10.61 0.63
 15 2 0 1.98 0.31
 15 2 0 1.22 0.22
 -15 -2 0 1.27 0.49
 15 -2 0 1.32 0.28
 -15 -2 0 1.44 0.22
 15 2 1 0.33 0.13
 15 2 1 0.58 0.17
 15 2 1 0.53 0.21
 15 -2 1 0.94 0.24
 -15 -2 -1 0.53 0.15
 15 2 2 0.04 0.12
 15 2 2 0.33 0.15
 15 2 2 0.09 0.15
 -15 2 -2 0.15 0.19
 -15 -2 -2 0.24 0.13
 15 -2 2 0.49 0.23
 15 2 3 11.64 0.77
 -15 2 -3 10.52 0.91
 15 2 3 11.68 0.71
 15 2 3 11.79 0.6
 15 -2 3 11.89 0.73
 15 2 4 0.88 0.21
 15 2 4 1.19 0.25
 -15 2 -4 1.17 0.3
 -15 -2 -4 1.3 0.36
 15 -2 4 1.16 0.24
 15 2 5 0.29 0.14
 15 2 5 0.27 0.16
 -15 2 -5 0.18 0.18
 15 -2 5 0.29 0.23
 -15 -2 -5 0.5 0.27
 15 -2 5 0.09 0.15
 15 2 6 1.11 0.16
 15 2 6 1.36 0.23
 -15 2 -6 1.16 0.3
 15 -2 6 1.33 0.25
 -15 -2 -6 1.37 0.35
 15 -2 6 1.24 0.2
 -15 2 -7 0.03 0.18
 15 2 7 0.07 0.11
 15 -2 7 0 0.12
 -15 -2 -7 0.26 0.2
 15 -2 7 0.28 0.15
 15 2 8 -0.01 0.07
 -15 -2 -8 -0.14 0.16
 15 -2 8 0.03 0.07
 15 -2 8 -0.18 0.09
 15 -3 -8 0.44 0.12
 -15 3 7 0.21 0.33
 15 -3 -7 0 0.13
 -15 -3 7 -0.01 0.08
 -15 3 6 0.51 0.31
 -15 -3 6 0.96 0.17
 15 -3 -6 0.87 0.2
 15 -3 -6 1.06 0.26
 -15 -3 6 0.82 0.37
 15 -3 -6 0.99 0.16
 -15 3 5 0.51 0.39
 -15 3 5 0.84 0.1
 15 -3 -5 1.02 0.19
 15 -3 -5 0.85 0.23
 -15 -3 5 0.63 0.45
 -15 -3 5 0.72 0.2
 15 3 -4 3.55 0.32
 -15 3 4 3.77 0.74
 15 -3 -4 4.15 0.43
 15 -3 -4 3.37 0.36
 -15 -3 4 3.72 0.35
 -15 -3 4 2.31 0.62
 15 3 -3 2.91 0.32
 -15 3 3 3.85 0.68
 -15 -3 3 2.55 0.31
 15 -3 -3 3.12 0.36
 15 -3 -3 3.02 0.44
 -15 -3 3 2.56 0.63
 -15 3 2 15.04 1.28
 15 3 -2 14.57 0.83
 -15 -3 2 12.42 1.35
 15 -3 -2 13.74 0.82
 -15 -3 2 13.8 0.78
 15 3 -1 0 0.13
 -15 -3 1 0.05 0.14
 15 -3 -1 -0.02 0.21
 -15 -3 1 -0.29 0.34
 15 3 0 0.25 0.15
 15 3 0 0.08 0.11
 -15 -3 0 0.18 0.29
 15 -3 0 0.07 0.16
 -15 -3 0 0.17 0.14
 15 3 1 0.87 0.17
 -15 3 -1 1.32 0.33
 15 3 1 1.08 0.23
 -15 -3 -1 1.22 0.23
 15 -3 1 1.48 0.31
 15 3 2 5.14 0.37
 15 3 2 4.78 0.46
 -15 3 -2 4.27 0.59
 15 -3 2 6.12 0.53
 -15 -3 -2 3.94 0.36
 -15 3 -3 1.76 0.39
 15 3 3 1.49 0.2
 15 3 3 1.8 0.28
 -15 -3 -3 1.95 0.23
 15 -3 3 2.47 0.34
 15 3 4 0.1 0.11
 -15 3 -4 -0.16 0.2
 15 3 4 0.1 0.14
 15 -3 4 -0.16 0.18
 -15 -3 -4 0.26 0.24
 -15 3 -5 -0.01 0.21
 15 3 5 0.23 0.14
 15 -3 5 0.18 0.17
 -15 -3 -5 0.06 0.16
 15 3 6 0.21 0.12
 -15 3 -6 -0.01 0.21
 15 -3 6 0.14 0.2
 -15 -3 -6 -0.04 0.2
 15 -3 6 0.2 0.14
 15 3 7 0.32 0.11
 -15 3 -7 0.1 0.17
 15 -3 7 0.51 0.13
 -15 -3 -7 0.45 0.2
 15 -3 7 0.19 0.15
 15 -4 -8 -0.03 0.09
 -15 4 7 0.55 0.39
 15 -4 -7 0.29 0.17
 -15 -4 7 0.53 0.13
 -15 4 6 2.76 0.6
 -15 -4 6 2.88 0.28
 -15 -4 6 2.75 0.28
 -15 -4 6 2.89 0.57
 15 -4 -6 2.66 0.31
 15 -4 -6 2.56 0.26
 -15 4 5 0.02 0.24
 15 -4 -5 0.42 0.15
 -15 -4 5 0.39 0.17
 -15 -4 5 0.4 0.37
 15 -4 -5 0.5 0.23
 -15 4 4 0.39 0.3
 -15 -4 4 0.65 0.42
 -15 -4 4 0.86 0.2
 15 -4 -4 0.59 0.27
 15 -4 -4 0.8 0.2
 -15 4 3 3.47 0.63
 15 4 -3 2.62 0.2
 15 -4 -3 2.32 0.33
 -15 -4 3 3.24 0.34
 -15 -4 3 2.81 0.6
 -15 4 2 6.53 0.91
 15 4 -2 6.57 0.43
 15 -4 -2 7.18 0.58
 -15 -4 2 6.8 0.5
 -15 -4 2 6.05 0.92
 15 4 -1 2.81 0.29
 -15 -4 1 2.59 0.32
 15 -4 -1 3.01 0.39
 -15 -4 1 2.03 0.59
 15 4 0 0.17 0.14
 -15 -4 0 -0.01 0.15
 15 4 1 0.01 0.14
 -15 4 -1 0.23 0.26
 -15 -4 -1 0.03 0.13
 15 4 2 0.37 0.16
 -15 4 -2 0.95 0.28
 -15 -4 -2 0.69 0.18
 15 4 3 0.03 0.14
 -15 4 -3 0.32 0.25
 -15 -4 -3 0 0.11
 15 4 4 1.36 0.22
 -15 4 -4 1.24 0.33
 15 -4 4 1.05 0.27
 -15 -4 -4 1.45 0.35
 -15 -4 -4 1.23 0.18
 -15 -4 -4 1.15 0.24
 -15 4 -5 0.94 0.24
 15 4 5 0.51 0.12
 15 -4 5 0.51 0.2
 -15 -4 -5 0.78 0.24
 -15 4 -6 1.1 0.26
 15 4 6 0.93 0.14
 15 -4 6 1.36 0.22
 -15 -4 -6 1 0.29
 15 -4 7 1.09 0.17
 15 -4 7 1.57 0.23
 -15 -4 -7 1.66 0.28
 15 -5 -7 0.92 0.11
 -15 -5 7 1.17 0.16
 15 -5 -7 1.18 0.22
 -15 5 6 6.39 0.81
 -15 -5 6 6.98 0.44
 15 -5 -6 6.91 0.5
 15 -5 -6 6.62 0.43
 -15 -5 6 6.46 0.44
 -15 5 5 0.2 0.32
 -15 -5 5 0.01 0.13
 -15 -5 5 -0.26 0.3
 15 -5 -5 0.17 0.14
 15 -5 -5 0.29 0.2
 -15 5 4 0.33 0.38
 15 -5 -4 0.4 0.19
 -15 -5 4 0.08 0.34
 -15 -5 4 0.62 0.18
 -15 5 3 4.3 0.72
 -15 -5 3 3 0.67
 -15 -5 3 3.23 0.36
 15 -5 -3 3.39 0.4
 -15 5 2 0.08 0.35
 15 -5 -2 0.04 0.21
 -15 -5 2 0.14 0.21
 -15 -5 2 0 0.35
 -15 -5 1 2.91 0.35
 -15 5 0 0.38 0.25
 -15 -5 0 0.4 0.17
 15 5 1 0.49 0.11
 -15 5 -1 0.71 0.29
 -15 -5 -1 0.62 0.21
 15 5 2 0.21 0.1
 -15 5 -2 0.2 0.17
 -15 -5 -2 -0.09 0.14
 15 5 3 3.51 0.25
 -15 5 -3 2.68 0.43
 -15 -5 -3 2.55 0.29
 15 5 4 0.01 0.06
 -15 5 -4 -0.13 0.11
 -15 -5 -4 0.03 0.13
 -15 -5 -4 -0.02 0.19
 -15 5 -5 2.59 0.39
 -15 -5 -5 2.77 0.41
 -15 -5 -5 2.67 0.34
 15 -5 5 2.81 0.33
 -15 5 -6 0.05 0.18
 -15 -5 -6 0.23 0.19
 15 -5 6 0.08 0.15
 -15 -5 -7 0.22 0.18
 15 -5 7 -0.01 0.14
 15 -5 7 0.23 0.12
 -15 -6 7 0.34 0.11
 15 -6 -7 0.08 0.08
 -15 6 6 0.05 0.23
 -15 -6 6 0.14 0.14
 -15 -6 6 0.07 0.12
 15 -6 -6 0.16 0.14
 15 -6 -6 0.07 0.11
 -15 6 5 -0.28 0.29
 -15 -6 5 -0.11 0.33
 15 -6 -5 0.05 0.13
 15 -6 -5 0.23 0.21
 -15 -6 5 0.04 0.11
 -15 6 4 1.34 0.45
 -15 -6 4 0.85 0.2
 -15 -6 4 0.95 0.41
 15 -6 -4 0.85 0.23
 -15 6 3 4 0.7
 15 -6 -3 4.04 0.44
 -15 -6 3 5.81 0.47
 -15 -6 3 4.59 0.78
 -15 -6 2 0.17 0.15
 -15 -6 2 -0.13 0.42
 -15 6 1 1.84 0.35
 -15 -6 1 2 0.3
 -15 6 0 0.27 0.12
 -15 6 0 0.02 0.15
 -15 -6 0 0.4 0.18
 -15 6 -1 0.69 0.17
 -15 6 -1 0.53 0.27
 -15 -6 -1 0.46 0.17
 -15 6 -2 0.8 0.18
 -15 6 -2 1.25 0.32
 -15 -6 -2 1.1 0.23
 -15 6 -3 1.62 0.35
 -15 6 -3 1.61 0.22
 -15 -6 -3 1.59 0.27
 -15 6 -4 0.39 0.12
 -15 6 -4 0.14 0.16
 -15 -6 -4 0.12 0.12
 -15 6 -5 0.04 0.1
 -15 6 -5 0.13 0.17
 -15 -6 -5 0.02 0.09
 -15 -6 -5 -0.03 0.19
 -15 -6 -5 -0.1 0.14
 -15 -6 -6 0.05 0.17
 15 -6 6 -0.03 0.13
 -15 -7 6 0.16 0.1
 15 -7 -6 0.09 0.1
 15 -7 -6 0.28 0.17
 -15 -7 6 -0.06 0.09
 -15 7 5 0.95 0.4
 15 -7 -5 1.62 0.22
 -15 -7 5 1.78 0.22
 -15 -7 5 2.07 0.52
 15 -7 -5 1.9 0.28
 -15 7 4 0.41 0.34
 -15 -7 4 0.41 0.3
 15 -7 -4 0.52 0.19
 -15 -7 4 0.42 0.16
 -15 7 3 0.84 0.44
 -15 -7 3 0.9 0.21
 -15 -7 3 0.56 0.31
 -15 7 2 0.84 0.19
 -15 -7 2 0.59 0.39
 -15 -7 2 0.57 0.19
 -15 7 1 7.97 0.69
 -15 7 1 6.51 0.44
 -15 -7 1 6.97 0.53
 -15 7 0 2.24 0.26
 -15 7 0 1.41 0.31
 -15 -7 0 2.11 0.31
 -15 7 -1 -0.11 0.08
 -15 7 -1 -0.3 0.16
 -15 -7 -1 -0.13 0.18
 -15 7 -2 0.33 0.14
 -15 7 -2 0.28 0.18
 -15 -7 -2 -0.08 0.17
 -15 7 -3 0.26 0.19
 -15 7 -3 0.4 0.13
 -15 -7 -3 0.57 0.19
 -15 7 -4 -0.04 0.08
 -15 7 -4 0.37 0.21
 -15 -7 -4 -0.13 0.13
 -15 7 -5 0.14 0.18
 -15 7 -5 0.37 0.13
 -15 -7 -5 0.23 0.1
 -15 -7 -5 0.21 0.19
 -15 7 -6 0.05 0.08
 -15 -7 -6 0.01 0.17
 15 -7 6 0.38 0.17
 15 -8 -5 0.4 0.12
 -15 -8 5 0.36 0.13
 15 -8 -4 1.12 0.2
 -15 -8 4 0.92 0.2
 -15 -8 4 0.02 0.36
 -15 8 3 0.71 0.16
 -15 -8 3 0.6 0.39
 -15 -8 3 0.55 0.18
 -15 8 2 0.31 0.22
 -15 8 2 0.07 0.1
 -15 -8 2 -0.09 0.37
 -15 -8 2 0.12 0.16
 -15 8 1 2.96 0.43
 -15 8 1 3.72 0.32
 -15 -8 1 3.99 0.39
 -15 8 0 -0.01 0.2
 -15 8 0 0.34 0.12
 -15 -8 0 0.26 0.21
 -15 8 -1 0.97 0.27
 -15 8 -1 0.64 0.15
 -15 -8 -1 0.8 0.22
 -15 8 -2 0.21 0.15
 -15 8 -2 0.16 0.09
 -15 -8 -2 -0.07 0.15
 -15 8 -3 0.17 0.1
 -15 8 -3 0.35 0.16
 -15 -8 -3 0.18 0.14
 -15 8 -4 -0.13 0.16
 -15 8 -4 0.05 0.08
 -15 -8 -4 0.08 0.13
 -15 8 -5 0.67 0.12
 -15 -8 -5 0.65 0.1
 -15 -8 -5 1 0.23
 -15 9 4 1.97 0.2
 -15 -9 4 1.98 0.23
 15 -9 -4 1.91 0.23
 -15 9 3 0.06 0.16
 -15 9 3 0.23 0.11
 -15 -9 3 -0.02 0.13
 -15 9 2 0.42 0.2
 -15 9 2 0.46 0.12
 -15 -9 2 0.41 0.18
 -15 -9 2 0.4 0.37
 -15 9 1 0.56 0.12
 -15 9 1 0.1 0.18
 -15 -9 1 0.17 0.18
 -15 9 0 0.25 0.16
 -15 9 0 0.08 0.1
 -15 -9 0 0.28 0.15
 -15 9 -1 0.39 0.23
 -15 9 -1 0.51 0.13
 -15 -9 -1 0.36 0.17
 -15 9 -2 2.56 0.35
 -15 9 -2 2.69 0.24
 -15 -9 -2 2.4 0.27
 -15 9 -3 0.63 0.11
 -15 9 -3 0.32 0.19
 -15 -9 -3 0.36 0.13
 -15 9 -4 2.51 0.2
 -15 -9 -4 1.92 0.19
 -15 10 3 0.19 0.18
 -15 10 3 0.02 0.07
 -15 -10 3 0.03 0.13
 -15 10 2 0.48 0.18
 -15 10 2 0.49 0.11
 -15 -10 2 0.27 0.13
 -15 10 1 0.51 0.11
 -15 10 1 0.23 0.17
 -15 -10 1 0.56 0.17
 -15 10 0 0 0.07
 -15 10 0 -0.1 0.13
 -15 -10 0 0.31 0.14
 -15 10 -1 0.68 0.12
 -15 10 -1 0.57 0.19
 -15 -10 -1 0.94 0.17
 -15 10 -2 0.32 0.17
 -15 10 -2 0.3 0.08
 -15 -10 -2 0.13 0.13
 16 0 -7 0.09 0.07
 -16 0 7 -0.02 0.33
 16 0 -6 0.43 0.14
 -16 0 6 0.01 0.33
 -16 0 5 0.08 0.33
 16 0 -5 0.1 0.09
 16 0 -5 -0.05 0.14
 16 0 -4 1.23 0.22
 16 0 -4 1.34 0.27
 -16 0 4 1.01 0.47
 -16 0 3 -0.51 0.19
 16 0 -3 0.14 0.12
 16 0 -3 -0.13 0.16
 16 0 -3 0.4 0.17
 16 0 -2 6.32 0.59
 16 0 -2 6.06 0.51
 16 0 -2 6.98 0.45
 -16 0 2 7.54 1
 16 0 -1 -0.01 0.15
 -16 0 1 0.06 0.25
 16 0 -1 0.16 0.16
 16 0 -1 0.03 0.15
 16 0 0 0.73 0.27
 16 0 0 0.53 0.17
 16 0 0 0.26 0.17
 16 0 1 -0.22 0.17
 16 0 1 -0.02 0.14
 16 0 2 1.13 0.26
 16 0 2 0.96 0.2
 16 0 3 -0.07 0.13
 16 0 3 0.07 0.18
 -16 0 -3 0.38 0.25
 -16 0 -4 0.43 0.27
 16 0 4 0.95 0.23
 16 0 4 0.64 0.17
 16 0 5 -0.24 0.12
 -16 0 -5 -0.22 0.2
 16 0 5 0.04 0.2
 16 0 5 -0.04 0.09
 16 0 6 0.58 0.15
 16 0 6 0.54 0.2
 16 0 6 0.65 0.12
 -16 0 -6 0.64 0.21
 -16 0 -7 -0.21 0.16
 16 0 7 0.01 0.15
 16 0 7 -0.01 0.09
 -16 1 7 0.25 0.09
 -16 1 7 0.07 0.29
 16 -1 -7 0.25 0.1
 16 1 -6 0.25 0.11
 -16 1 6 0.14 0.3
 -16 -1 6 0.36 0.33
 16 -1 -6 0.44 0.15
 16 1 -5 0.34 0.16
 -16 1 5 0.33 0.36
 16 -1 -5 0.23 0.12
 -16 -1 5 -0.23 0.32
 16 -1 -5 -0.09 0.14
 16 1 -4 7.72 0.45
 16 1 -4 8.04 0.58
 -16 1 4 7.82 0.99
 16 -1 -4 8.39 0.47
 -16 -1 4 8.02 0.44
 -16 -1 4 8.03 1
 16 -1 -4 8.01 0.57
 16 -1 -4 8.42 0.65
 16 1 -3 0.75 0.16
 -16 1 3 1.01 0.46
 16 1 -3 0.64 0.18
 16 -1 -3 0.41 0.27
 -16 -1 3 0.76 0.14
 16 -1 -3 0.63 0.17
 -16 -1 3 0.98 0.47
 -16 -1 3 0.66 0.14
 16 -1 -3 1.08 0.24
 16 1 -2 2.3 0.35
 16 1 -2 2.82 0.31
 -16 1 2 3.58 0.7
 -16 -1 2 2.76 0.25
 16 -1 -2 2.64 0.36
 16 -1 -2 2.58 0.3
 -16 -1 2 2.93 0.65
 16 1 -1 0.84 0.17
 16 1 -1 1.4 0.29
 -16 1 1 1.48 0.54
 16 1 -1 1.05 0.22
 -16 -1 1 1.22 0.52
 -16 -1 1 0.97 0.16
 16 -1 -1 0.8 0.25
 16 -1 -1 1.33 0.22
 16 1 0 0.35 0.17
 16 1 0 0.45 0.16
 16 1 0 0.66 0.23
 16 -1 0 0.52 0.23
 16 -1 0 0.43 0.17
 16 1 1 6.94 0.62
 16 1 1 8.24 0.56
 16 1 1 6.87 0.45
 16 -1 1 7.84 0.61
 16 -1 1 6.73 0.51
 16 1 2 10.53 0.58
 16 1 2 10.85 0.75
 16 1 2 9.82 0.66
 -16 1 -2 10.19 0.87
 16 -1 2 9.29 0.7
 16 -1 2 9.83 0.63
 16 1 3 2.07 0.24
 16 1 3 2.77 0.36
 -16 1 -3 1.56 0.39
 16 1 3 1.9 0.29
 -16 -1 -3 1.97 0.41
 16 -1 3 1.86 0.32
 16 -1 3 1.98 0.29
 16 1 4 0.07 0.11
 16 1 4 0.14 0.14
 16 1 4 -0.08 0.18
 -16 1 -4 -0.13 0.21
 16 -1 4 0.01 0.19
 16 -1 4 0.13 0.15
 -16 -1 -4 -0.07 0.22
 -16 1 -5 0.13 0.24
 16 1 5 0.51 0.16
 16 1 5 0.04 0.17
 16 -1 5 0.53 0.2
 -16 -1 -5 0.55 0.26
 16 -1 5 0.19 0.13
 16 1 6 2.17 0.23
 16 1 6 2.85 0.33
 -16 1 -6 2.32 0.37
 -16 -1 -6 2.38 0.36
 16 -1 6 2.46 0.24
 16 -1 6 2.49 0.29
 16 1 7 0.23 0.13
 -16 1 -7 0.23 0.19
 16 -1 7 0.25 0.1
 -16 -1 -7 0.2 0.2
 16 -1 7 0.2 0.16
 -16 -2 8 0.06 0.1
 16 -2 -8 0.09 0.07
 16 -2 -7 0.33 0.12
 -16 2 6 1.79 0.43
 -16 2 6 2.33 0.16
 16 -2 -6 1.89 0.29
 -16 -2 6 2.61 0.56
 -16 2 5 2.42 0.54
 16 2 -5 2.79 0.26
 16 -2 -5 3.28 0.25
 16 -2 -5 3.42 0.41
 -16 -2 5 2.5 0.57
 16 -2 -5 2.67 0.3
 -16 -2 5 2.29 0.23
 16 2 -4 8.07 0.52
 -16 2 4 7.12 0.93
 16 -2 -4 7.48 0.62
 -16 -2 4 6.31 0.93
 16 -2 -4 7.49 0.49
 16 -2 -4 7.42 0.58
 -16 -2 4 7.78 0.46
 -16 2 3 0.26 0.38
 16 2 -3 0.19 0.12
 -16 -2 3 -0.3 0.22
 -16 -2 3 0.07 0.1
 16 -2 -3 -0.09 0.12
 16 -2 -3 0.08 0.17
 16 2 -2 1.49 0.19
 16 2 -2 1.75 0.28
 -16 2 2 1.43 0.52
 -16 -2 2 1.55 0.22
 16 -2 -2 1.78 0.32
 16 -2 -2 1.25 0.24
 -16 -2 2 2.02 0.6
 16 2 -1 18.66 0.98
 16 2 -1 19.64 1.07
 16 -2 -1 18.94 1.13
 -16 -2 1 19.04 1.54
 16 -2 -1 18.88 1.01
 -16 -2 1 18.9 0.94
 16 2 0 7.07 0.55
 16 2 0 6.52 0.5
 -16 -2 0 8.12 1.01
 -16 -2 0 7.35 0.45
 16 -2 0 7.32 0.54
 16 -2 0 7.9 0.67
 16 2 1 7.47 0.59
 16 2 1 7.42 0.52
 -16 -2 -1 7.97 0.46
 16 -2 1 9.1 0.7
 16 -2 1 7.97 0.56
 16 2 2 1.76 0.31
 -16 2 -2 2.35 0.43
 16 2 2 2.4 0.27
 16 -2 2 1.79 0.29
 16 -2 2 1.74 0.35
 16 2 3 6.19 0.56
 -16 2 -3 6.89 0.71
 16 2 3 7.15 0.48
 16 -2 3 6.82 0.5
 16 -2 3 7.52 0.59
 16 2 4 2.08 0.31
 -16 2 -4 2.27 0.41
 16 2 4 2.86 0.28
 16 -2 4 2.58 0.39
 -16 -2 -4 2.69 0.43
 16 -2 4 2.71 0.31
 -16 2 -5 0.96 0.29
 16 2 5 1.32 0.24
 16 2 5 1.2 0.16
 16 -2 5 1.26 0.22
 16 -2 5 1.24 0.28
 -16 -2 -5 1.77 0.35
 16 2 6 0.12 0.12
 -16 2 -6 0.03 0.19
 16 -2 6 0.15 0.11
 16 -2 6 -0.04 0.13
 -16 -2 -6 0.14 0.16
 -16 2 -7 0 0.15
 16 2 7 -0.03 0.09
 -16 -2 -7 -0.03 0.15
 16 -2 7 0 0.1
 16 -2 7 0.06 0.1
 16 -3 -7 0.13 0.13
 -16 3 6 0.9 0.41
 16 -3 -6 1.27 0.25
 -16 -3 6 0.97 0.15
 -16 -3 6 0.45 0.27
 16 -3 -6 0.64 0.17
 -16 3 5 4.55 0.77
 -16 -3 5 5.31 0.76
 -16 -3 5 5.72 0.37
 -16 -3 5 5.56 0.37
 16 -3 -5 5.46 0.36
 16 -3 -5 5.58 0.46
 16 3 -4 1.61 0.18
 -16 3 4 1.95 0.55
 16 -3 -4 1.92 0.31
 -16 -3 4 2.05 0.55
 -16 -3 4 1.35 0.21
 16 -3 -4 1.59 0.24
 -16 3 3 1.85 0.56
 16 3 -3 2.21 0.24
 16 -3 -3 1.29 0.25
 -16 -3 3 1.62 0.23
 -16 -3 3 1.71 0.56
 16 -3 -3 1.59 0.3
 16 3 -2 0.79 0.18
 -16 3 2 0.36 0.42
 16 -3 -2 1.01 0.27
 -16 -3 2 0.65 0.18
 16 -3 -2 0.36 0.16
 -16 -3 2 0.34 0.38
 16 3 -1 6.74 0.5
 -16 -3 1 6.42 0.45
 -16 -3 1 8.17 1.02
 16 -3 -1 6.6 0.55
 16 3 0 2.43 0.31
 -16 -3 0 2.42 0.58
 -16 -3 0 2.52 0.28
 16 -3 0 2.35 0.34
 -16 3 -1 1.31 0.36
 16 3 1 1.7 0.28
 16 -3 1 1.62 0.29
 -16 -3 -1 1.69 0.24
 16 3 2 -0.01 0.12
 -16 3 -2 0.27 0.24
 16 3 2 0.07 0.11
 16 -3 2 0.44 0.21
 -16 -3 -2 0.18 0.12
 -16 3 -3 2.04 0.39
 16 3 3 2.08 0.29
 16 -3 3 2.13 0.31
 -16 3 -4 1.42 0.33
 16 3 4 1.49 0.24
 16 -3 4 1.69 0.29
 -16 -3 -4 1.52 0.36
 16 3 5 0.01 0.1
 -16 3 -5 0.25 0.21
 16 -3 5 -0.02 0.13
 -16 -3 -5 -0.02 0.2
 16 -3 5 -0.04 0.19
 -16 3 -6 3.05 0.39
 16 3 6 2.37 0.24
 16 -3 6 3.11 0.28
 -16 -3 -6 2.71 0.39
 16 -3 6 4.26 0.39
 16 -3 7 0.01 0.1
 -16 -3 -7 -0.06 0.15
 16 -3 7 -0.03 0.1
 16 -4 -7 -0.06 0.1
 -16 -4 6 5.77 0.37
 16 -4 -6 6.14 0.44
 16 -4 -6 5.54 0.5
 -16 4 5 0.36 0.38
 16 -4 -5 0.38 0.19
 -16 -4 5 0.41 0.13
 16 -4 -5 0.32 0.16
 -16 -4 5 0.64 0.39
 -16 4 4 5 0.77
 16 -4 -4 4.64 0.41
 -16 -4 4 4.47 0.75
 -16 -4 4 5 0.38
 16 -4 -4 4.72 0.48
 -16 4 3 -0.35 0.35
 -16 -4 3 0.11 0.13
 -16 -4 3 -0.2 0.32
 16 -4 -3 0.17 0.2
 16 -4 -3 0.08 0.15
 16 4 -2 0.08 0.08
 -16 4 2 0.37 0.33
 16 -4 -2 0.14 0.17
 -16 -4 2 0.23 0.15
 -16 -4 2 0.41 0.41
 16 4 -1 3.2 0.29
 -16 -4 1 3.38 0.33
 16 -4 -1 2.71 0.37
 -16 -4 1 2.75 0.57
 16 4 0 0.34 0.15
 -16 -4 0 1.16 0.45
 16 -4 0 0.36 0.24
 -16 -4 0 0.43 0.17
 -16 4 -1 0.03 0.21
 16 4 1 0.28 0.12
 16 -4 1 0.16 0.22
 -16 -4 -1 0.21 0.15
 -16 4 -2 5.12 0.59
 16 4 2 4.93 0.37
 16 -4 2 4.8 0.48
 -16 -4 -2 5.4 0.39
 16 4 3 0.3 0.14
 -16 4 -3 0.61 0.27
 -16 -4 -3 0.44 0.13
 16 -4 3 0.58 0.23
 -16 4 -4 7.99 0.68
 16 4 4 7.32 0.47
 -16 -4 -4 7.08 0.65
 16 -4 4 7.06 0.52
 -16 4 -5 0.35 0.21
 16 4 5 0.36 0.11
 16 -4 5 0.36 0.17
 -16 -4 -5 0.44 0.22
 -16 4 -6 0.16 0.16
 16 -4 6 0.12 0.16
 16 -4 6 -0.23 0.09
 -16 -4 -6 -0.09 0.11
 -16 -4 -7 -0.02 0.16
 16 -4 7 0.05 0.11
 16 -4 7 0.23 0.11
 16 -5 -7 -0.03 0.1
 -16 -5 7 0.24 0.08
 16 -5 -6 0.77 0.16
 16 -5 -6 0.61 0.13
 -16 -5 6 1.06 0.17
 -16 5 5 0.92 0.42
 -16 -5 5 1.12 0.41
 -16 -5 5 0.66 0.17
 16 -5 -5 1.22 0.18
 16 -5 -5 1.21 0.24
 -16 5 4 1.65 0.5
 -16 -5 4 0.64 0.31
 -16 -5 4 1.47 0.23
 16 -5 -4 1.18 0.22
 16 -5 -4 1.34 0.3
 -16 5 3 0.87 0.45
 16 -5 -3 1.19 0.24
 -16 -5 3 0.88 0.41
 -16 -5 3 0.96 0.2
 -16 -5 2 0.22 0.15
 -16 -5 2 -0.02 0.36
 16 -5 -2 0.35 0.19
 -16 -5 1 1.42 0.5
 -16 -5 1 1.76 0.26
 16 -5 -1 2.03 0.33
 -16 5 0 5.99 0.65
 -16 -5 0 6.6 0.92
 -16 -5 0 6.17 0.46
 -16 5 -1 1.85 0.35
 -16 -5 -1 1.27 0.52
 -16 -5 -1 1.52 0.24
 -16 5 -2 0.3 0.23
 -16 -5 -2 0.21 0.15
 -16 5 -3 1.25 0.31
 -16 -5 -3 0.75 0.17
 -16 5 -4 0.4 0.22
 16 -5 4 0.23 0.18
 -16 -5 -4 0.7 0.12
 -16 5 -5 0.54 0.18
 16 -5 5 0.94 0.2
 -16 -5 -5 0.84 0.24
 -16 5 -6 0.36 0.18
 16 -5 6 0.37 0.12
 -16 -5 -6 0.24 0.18
 -16 -6 6 -0.04 0.08
 16 -6 -6 0.1 0.1
 16 -6 -6 0.13 0.11
 -16 6 5 0.73 0.37
 -16 -6 5 0.84 0.4
 16 -6 -5 0.76 0.21
 16 -6 -5 0.63 0.15
 -16 -6 5 0.77 0.18
 -16 6 4 -0.05 0.31
 16 -6 -4 0.06 0.15
 -16 -6 4 0.04 0.12
 -16 -6 4 0.1 0.25
 16 -6 -4 0.2 0.21
 -16 6 3 0.14 0.38
 -16 -6 3 0.21 0.17
 16 -6 -3 0.07 0.17
 -16 -6 3 0.07 0.37
 -16 -6 2 1.11 0.45
 -16 -6 2 0.92 0.2
 16 -6 -2 0.56 0.24
 -16 6 1 1.28 0.28
 -16 -6 1 0.54 0.35
 -16 -6 1 1.38 0.25
 -16 6 0 2.26 0.4
 -16 -6 0 1.87 0.67
 -16 -6 0 3.06 0.34
 -16 6 -1 0.27 0.21
 -16 -6 -1 0.17 0.15
 -16 6 -2 0.79 0.17
 -16 6 -2 0.63 0.26
 -16 -6 -2 0.57 0.17
 -16 6 -3 0.01 0.14
 -16 6 -3 0.19 0.13
 -16 -6 -3 0.17 0.13
 -16 6 -4 0.05 0.17
 -16 6 -4 0.08 0.1
 -16 -6 -4 0.1 0.1
 -16 6 -5 1.74 0.28
 16 -6 5 1.94 0.27
 -16 -6 -5 1.91 0.3
 16 -6 6 0.19 0.11
 -16 -6 -6 -0.18 0.14
 -16 -7 6 0.34 0.11
 16 -7 -6 0.5 0.11
 -16 -7 5 0.06 0.1
 16 -7 -5 0.22 0.15
 16 -7 -5 0.29 0.11
 -16 -7 4 -0.13 0.3
 -16 -7 4 0.04 0.13
 16 -7 -4 0.09 0.13
 -16 -7 3 3.32 0.61
 16 -7 -3 3.37 0.35
 -16 -7 3 3.07 0.33
 16 -7 -2 -0.08 0.19
 -16 -7 2 0.09 0.14
 -16 -7 2 0.1 0.36
 -16 7 1 0.02 0.18
 -16 7 1 0.15 0.12
 -16 -7 1 0.16 0.37
 -16 -7 1 -0.03 0.13
 -16 7 0 1.19 0.19
 -16 7 0 0.45 0.24
 -16 -7 0 1 0.2
 -16 7 -1 0.24 0.13
 -16 7 -1 -0.08 0.13
 -16 -7 -1 0.11 0.13
 -16 7 -2 -0.07 0.08
 -16 7 -2 0.19 0.2
 -16 -7 -2 0.12 0.13
 -16 7 -3 0.17 0.19
 -16 7 -3 0.07 0.12
 -16 -7 -3 -0.03 0.09
 -16 7 -4 0.09 0.11
 -16 7 -4 0.06 0.18
 -16 -7 -4 -0.03 0.09
 -16 7 -5 0.21 0.1
 -16 -7 -5 0.16 0.18
 16 -7 5 0.04 0.18
 16 -8 -5 2.67 0.27
 -16 -8 4 0.27 0.12
 16 -8 -4 0.23 0.13
 -16 -8 3 1.73 0.22
 16 -8 -3 1.3 0.24
 -16 8 2 0.25 0.19
 -16 8 2 0.06 0.1
 -16 -8 2 0.07 0.12
 -16 -8 2 0.13 0.31
 -16 8 1 3.5 0.44
 -16 8 1 4.42 0.31
 -16 -8 1 3.78 0.36
 -16 -8 1 3.92 0.65
 -16 8 0 0.1 0.1
 -16 8 0 0.01 0.18
 -16 -8 0 0.15 0.13
 -16 8 -1 0.97 0.16
 -16 8 -1 1.28 0.28
 -16 -8 -1 0.77 0.18
 -16 8 -2 0.47 0.12
 -16 8 -2 0.12 0.17
 -16 -8 -2 0.27 0.14
 -16 8 -3 0.01 0.08
 -16 8 -3 0 0.16
 -16 -8 -3 -0.02 0.11
 -16 8 -4 0.55 0.11
 -16 8 -4 0.27 0.17
 -16 -8 -4 0.12 0.09
 -16 9 3 0.16 0.15
 -16 9 3 0.29 0.1
 -16 -9 3 0.23 0.11
 16 -9 -3 0.22 0.15
 -16 9 2 1.38 0.17
 -16 -9 2 1.43 0.2
 -16 9 1 0.07 0.15
 -16 9 1 0.11 0.09
 -16 -9 1 0.25 0.13
 -16 9 0 0.33 0.11
 -16 9 0 0.19 0.18
 -16 -9 0 0.22 0.13
 -16 9 -1 1.22 0.16
 -16 9 -1 0.65 0.21
 -16 -9 -1 0.94 0.16
 -16 9 -2 1.15 0.15
 -16 9 -2 0.9 0.22
 -16 -9 -2 1.04 0.17
 -16 -9 -3 0.85 0.14
 -16 10 1 0.68 0.1
 -16 -10 1 0.71 0.13
 -16 10 0 0.26 0.15
 -16 10 0 0.18 0.07
 -16 -10 0 0.15 0.09
 -17 0 7 -0.1 0.05
 17 0 -6 0.15 0.11
 -17 0 6 0.16 0.33
 17 0 -5 -0.02 0.13
 -17 0 5 -0.6 0.26
 17 0 -4 0.93 0.23
 -17 0 4 0.57 0.38
 17 0 -4 0.88 0.16
 -17 0 3 0.29 0.39
 17 0 -3 -0.06 0.11
 17 0 -3 -0.07 0.15
 17 0 -2 0.32 0.15
 17 0 -2 0.31 0.16
 -17 0 2 0.23 0.3
 17 0 -2 0.55 0.23
 17 0 -1 -0.2 0.11
 17 0 -1 -0.21 0.17
 -17 0 1 0.4 0.43
 17 0 -1 -0.04 0.18
 17 0 0 2.59 0.39
 17 0 0 1.74 0.29
 17 0 0 1.91 0.23
 17 0 1 -0.13 0.1
 17 0 1 0.2 0.22
 17 0 1 0.21 0.16
 17 0 2 0.84 0.22
 17 0 2 0.96 0.23
 17 0 2 1.1 0.2
 17 0 3 0.01 0.18
 17 0 3 0.1 0.14
 17 0 3 0.27 0.15
 -17 0 -3 0.02 0.24
 17 0 4 10.09 0.7
 17 0 4 9.54 0.62
 17 0 4 9.17 0.53
 -17 0 -4 10.28 0.8
 17 0 5 0.03 0.1
 -17 0 -5 -0.26 0.17
 17 0 5 -0.06 0.16
 17 0 5 0.03 0.09
 -17 0 -6 3.59 0.41
 17 0 6 4.16 0.37
 17 0 6 3.53 0.28
 17 0 7 -0.05 0.08
 -17 0 -7 0.17 0.16
 17 -1 -7 0.08 0.08
 -17 1 6 0.67 0.38
 -17 1 6 0.88 0.12
 17 -1 -6 0.49 0.15
 -17 -1 6 0.63 0.37
 -17 1 5 -0.12 0.32
 17 1 -5 -0.04 0.09
 17 -1 -5 -0.01 0.11
 17 -1 -5 0.09 0.15
 -17 -1 5 0.25 0.32
 -17 1 4 2.01 0.55
 17 1 -4 2.7 0.3
 17 -1 -4 2.36 0.3
 -17 -1 4 3.2 0.64
 17 -1 -4 2.83 0.37
 17 1 -3 2.54 0.33
 -17 1 3 2.44 0.59
 17 1 -3 2.3 0.24
 17 -1 -3 2.43 0.25
 -17 -1 3 1.89 0.55
 17 -1 -3 2.4 0.29
 17 -1 -3 2.16 0.36
 -17 1 2 6.87 0.92
 17 1 -2 7.58 0.48
 17 1 -2 6.93 0.57
 17 -1 -2 7.53 0.57
 17 -1 -2 8.16 0.69
 17 -1 -2 7.14 0.48
 -17 -1 2 7.15 0.93
 17 1 -1 18.39 1.06
 17 1 -1 18.88 0.99
 -17 -1 1 18.38 1.49
 17 -1 -1 17.98 1.05
 17 -1 -1 18.71 0.95
 17 1 0 0.49 0.14
 17 1 0 0.45 0.16
 17 1 0 0.5 0.21
 17 -1 0 0.83 0.23
 17 -1 0 0.52 0.17
 17 1 1 3.94 0.37
 17 1 1 3.94 0.29
 17 1 1 4.01 0.45
 17 -1 1 3.73 0.42
 17 -1 1 3.99 0.37
 17 1 2 7.12 0.53
 17 1 2 7.9 0.63
 -17 1 -2 8.7 0.75
 17 1 2 8.19 0.45
 17 -1 2 8.86 0.54
 17 -1 2 7.75 0.6
 17 1 3 3.52 0.26
 17 1 3 3.28 0.34
 17 1 3 3.79 0.42
 -17 1 -3 4.43 0.55
 17 -1 3 3.51 0.34
 17 -1 3 3.78 0.41
 -17 -1 -3 4.18 0.53
 17 1 4 0.3 0.15
 17 1 4 0.5 0.2
 -17 1 -4 0.59 0.25
 17 -1 4 0.21 0.13
 -17 -1 -4 0.56 0.2
 17 -1 4 0.28 0.18
 17 1 5 1.36 0.19
 -17 1 -5 1.48 0.31
 17 1 5 1.34 0.24
 -17 -1 -5 1.31 0.3
 17 -1 5 1.4 0.18
 17 -1 5 1.41 0.23
 17 1 6 0.2 0.13
 -17 1 -6 0.16 0.19
 17 -1 6 0.39 0.13
 17 -1 6 0.47 0.19
 17 -1 6 0.12 0.08
 -17 -1 -6 0.34 0.17
 17 1 7 0.03 0.09
 17 -1 7 0.09 0.08
 -17 -1 -7 -0.04 0.14
 17 -2 -7 0.16 0.09
 -17 2 6 2.1 0.49
 17 -2 -6 2.15 0.27
 -17 -2 6 1.61 0.46
 17 2 -5 0.03 0.07
 -17 2 5 0.15 0.3
 -17 -2 5 0.31 0.32
 17 -2 -5 0.11 0.13
 17 -2 -5 -0.07 0.15
 -17 2 4 0.27 0.38
 17 2 -4 0.29 0.13
 -17 -2 4 0.43 0.4
 17 -2 -4 0.11 0.21
 17 -2 -4 0.36 0.16
 -17 -2 4 0.29 0.11
 17 -2 -4 0.32 0.11
 -17 2 3 0.98 0.46
 17 2 -3 0.34 0.13
 17 -2 -3 0.29 0.19
 17 -2 -3 0.55 0.17
 -17 -2 3 0.55 0.12
 -17 -2 3 0.2 0.38
 -17 2 2 0.21 0.31
 17 2 -2 0.19 0.14
 -17 -2 2 0.1 0.12
 17 -2 -2 0.15 0.12
 17 -2 -2 0.35 0.2
 -17 -2 2 0.5 0.39
 17 2 -1 3.99 0.28
 17 2 -1 2.95 0.35
 17 -2 -1 3.84 0.42
 17 -2 -1 3.25 0.34
 -17 -2 1 2.98 0.69
 -17 -2 1 3.76 0.28
 17 2 0 2.93 0.27
 17 2 0 2.25 0.32
 17 -2 0 2.87 0.38
 -17 -2 0 2.24 0.2
 17 -2 0 2.36 0.31
 17 2 1 6.27 0.43
 17 2 1 6.07 0.49
 17 -2 1 5.53 0.54
 17 -2 1 6.03 0.5
 17 2 2 0.02 0.1
 17 2 2 0.05 0.15
 -17 2 -2 -0.09 0.22
 17 -2 2 0 0.15
 17 -2 2 -0.1 0.2
 -17 2 -3 0.41 0.25
 17 2 3 0.79 0.21
 17 2 3 0.34 0.12
 17 -2 3 0.61 0.19
 17 -2 3 0.52 0.25
 -17 2 -4 0.14 0.21
 17 2 4 0.08 0.17
 17 2 4 0.19 0.1
 17 -2 4 0.15 0.13
 -17 -2 -4 0.04 0.14
 17 -2 4 -0.09 0.15
 -17 2 -5 0.06 0.19
 17 2 5 0.09 0.12
 17 -2 5 0.27 0.15
 -17 -2 -5 -0.08 0.18
 17 -2 5 0.25 0.17
 17 2 6 1.55 0.19
 -17 2 -6 1.79 0.29
 17 -2 6 1.67 0.22
 -17 -2 -6 1.75 0.29
 17 -3 -7 0.22 0.11
 17 -3 -6 1.49 0.24
 -17 3 5 2.3 0.55
 -17 -3 5 3.19 0.24
 17 -3 -5 3.46 0.32
 17 -3 -5 3.88 0.4
 -17 -3 5 3.79 0.62
 -17 3 4 1.11 0.45
 -17 -3 4 1.69 0.2
 -17 -3 4 1.78 0.51
 17 -3 -4 2.15 0.24
 -17 -3 4 2.43 0.23
 17 -3 -4 1.98 0.29
 17 3 -3 0.38 0.11
 -17 3 3 0.6 0.39
 17 -3 -3 0.82 0.23
 -17 -3 3 0.39 0.38
 -17 -3 3 0.28 0.13
 17 -3 -3 0.34 0.17
 -17 3 2 -0.29 0.35
 17 3 -2 0.33 0.14
 -17 -3 2 1.07 0.19
 -17 -3 2 0.2 0.29
 17 -3 -2 0.67 0.26
 17 -3 -2 0.97 0.21
 17 3 -1 2.73 0.31
 17 -3 -1 3.55 0.42
 17 -3 -1 4.48 0.4
 -17 -3 1 3.88 0.3
 -17 -3 1 2.61 0.65
 17 3 0 10.87 0.66
 17 -3 0 10.56 0.67
 -17 -3 0 10.44 0.58
 -17 -3 0 10.69 1.17
 17 -3 0 10.58 0.77
 -17 3 -1 8.77 0.76
 17 3 1 8.9 0.59
 17 -3 1 8.98 0.61
 -17 -3 -1 8.96 0.49
 17 -3 1 9.11 0.71
 17 3 2 0.15 0.13
 -17 3 -2 0.18 0.21
 17 -3 2 0.08 0.18
 17 -3 2 -0.03 0.17
 -17 3 -3 0.18 0.22
 17 3 3 -0.12 0.12
 17 -3 3 0.12 0.17
 17 -3 3 0.17 0.24
 17 3 4 1.35 0.21
 -17 3 -4 1.16 0.29
 17 -3 4 1.4 0.23
 -17 -3 -4 1.74 0.33
 17 -3 4 1.76 0.29
 17 3 5 0.96 0.15
 -17 3 -5 1.06 0.25
 17 -3 5 0.89 0.17
 17 -3 5 1.14 0.22
 -17 -3 -5 1.02 0.23
 -17 3 -6 0.33 0.18
 17 3 6 0.12 0.07
 17 -3 6 0.04 0.11
 17 -3 6 0.14 0.12
 -17 -3 -6 0.23 0.17
 17 -4 -6 0.35 0.16
 -17 4 5 0.28 0.35
 -17 -4 5 0.22 0.1
 -17 -4 5 0.11 0.1
 17 -4 -5 0.34 0.15
 -17 -4 5 0.41 0.36
 17 -4 -5 0.14 0.1
 -17 4 4 -0.14 0.25
 -17 -4 4 -0.15 0.11
 17 -4 -4 0.21 0.14
 17 -4 -4 0.31 0.18
 -17 -4 4 0.03 0.32
 -17 4 3 1.48 0.5
 17 -4 -3 2.25 0.28
 -17 -4 3 1.98 0.54
 17 -4 -3 2.61 0.34
 -17 -4 3 1.37 0.21
 17 -4 -2 1.09 0.23
 -17 -4 2 1.3 0.49
 17 -4 -2 2.06 0.35
 -17 -4 2 1.15 0.19
 17 4 -1 0.38 0.1
 -17 -4 1 -0.21 0.34
 -17 -4 1 0.12 0.14
 17 -4 -1 0.24 0.18
 17 4 0 0.65 0.13
 -17 -4 0 0.78 0.18
 17 -4 0 0.67 0.22
 -17 -4 0 0.6 0.47
 -17 4 -1 0.78 0.28
 17 4 1 0.71 0.14
 -17 -4 -1 0.69 0.15
 17 -4 1 0.81 0.23
 -17 4 -2 0.54 0.24
 17 4 2 0.25 0.11
 17 -4 2 -0.13 0.18
 -17 -4 -2 0.21 0.1
 17 4 3 0.03 0.09
 -17 4 -3 0.05 0.18
 17 -4 3 0.24 0.17
 -17 4 -4 0.47 0.22
 17 4 4 0.38 0.1
 17 -4 4 0.44 0.17
 -17 -4 -4 0.68 0.25
 -17 4 -5 0.55 0.21
 17 -4 5 0.75 0.19
 17 -4 5 0.72 0.16
 -17 -4 -5 0.84 0.23
 -17 4 -6 0.15 0.15
 17 -4 6 0.14 0.13
 -17 -4 -6 0.18 0.17
 17 -4 6 0.38 0.13
 -17 -5 6 0.07 0.08
 17 -5 -5 -0.01 0.1
 -17 -5 5 -0.03 0.09
 17 -5 -5 0.12 0.12
 -17 -5 5 0.06 0.09
 -17 5 4 0.48 0.4
 -17 -5 4 -0.02 0.22
 17 -5 -4 0.28 0.16
 -17 -5 4 0.51 0.15
 17 -5 -4 0.4 0.18
 -17 5 3 0.45 0.43
 17 -5 -3 0.33 0.16
 17 -5 -3 -0.02 0.2
 -17 -5 3 0.07 0.14
 -17 -5 3 -0.22 0.19
 -17 -5 2 5.32 0.39
 17 -5 -2 5.45 0.47
 -17 -5 2 5.29 0.75
 -17 -5 1 0.38 0.14
 -17 -5 1 0.13 0.37
 17 -5 -1 0.49 0.2
 -17 5 0 0.07 0.19
 -17 -5 0 -0.02 0.11
 -17 -5 0 0.05 0.25
 17 -5 0 0.28 0.2
 -17 5 -1 -0.05 0.12
 -17 -5 -1 0.07 0.13
 17 -5 1 0.15 0.18
 -17 5 -2 -0.15 0.19
 17 -5 2 -0.03 0.21
 -17 -5 -2 0.3 0.13
 -17 5 -3 1.04 0.27
 17 -5 3 1.41 0.25
 -17 -5 -3 1.23 0.14
 -17 5 -4 0.07 0.19
 17 -5 4 -0.06 0.13
 -17 5 -5 -0.07 0.14
 -17 -5 -5 -0.1 0.16
 17 -5 5 0.03 0.11
 -17 -6 5 2.18 0.21
 -17 -6 5 2.58 0.22
 17 -6 -5 3.03 0.28
 17 -6 -5 2.73 0.23
 -17 -6 4 0.38 0.11
 17 -6 -4 0.57 0.19
 17 -6 -4 0.65 0.15
 -17 -6 4 0.69 0.37
 17 -6 -3 6.9 0.47
 -17 -6 3 6.96 0.44
 17 -6 -2 0.97 0.22
 -17 -6 2 1.57 0.46
 -17 -6 2 0.73 0.18
 -17 -6 1 0.88 0.34
 -17 -6 1 0.72 0.18
 17 -6 -1 0.16 0.19
 -17 6 0 1.01 0.24
 17 -6 0 1.08 0.24
 -17 -6 0 0.72 0.41
 -17 -6 0 0.92 0.17
 -17 6 -1 0.8 0.25
 -17 -6 -1 0.98 0.19
 17 -6 1 0.81 0.23
 -17 6 -2 0.16 0.17
 -17 -6 -2 0.18 0.12
 17 -6 2 0.07 0.23
 -17 6 -3 0.04 0.14
 17 -6 3 0.18 0.17
 -17 -6 -3 0.14 0.1
 -17 6 -4 0.04 0.15
 17 -6 4 0.5 0.18
 -17 6 -5 0.34 0.17
 -17 -6 -5 0.43 0.21
 17 -6 5 0.5 0.14
 -17 -7 5 5.31 0.32
 -17 -7 5 5.43 0.32
 17 -7 -5 5.96 0.4
 -17 -7 4 0.92 0.16
 17 -7 -4 1.43 0.23
 17 -7 -4 1.48 0.18
 17 -7 -3 1.17 0.2
 -17 -7 3 0.68 0.14
 17 -7 -2 0.05 0.14
 -17 -7 2 0 0.13
 -17 -7 2 -0.52 0.33
 -17 7 1 -0.15 0.15
 17 -7 -1 0.14 0.15
 -17 -7 1 -0.19 0.32
 -17 -7 1 -0.11 0.12
 -17 7 0 0.29 0.2
 -17 7 0 0.15 0.1
 -17 -7 0 0.04 0.36
 -17 -7 0 0.01 0.11
 -17 7 -1 0.2 0.18
 -17 7 -1 0.26 0.12
 -17 -7 -1 0.13 0.1
 -17 7 -2 0.15 0.18
 -17 7 -2 0.31 0.12
 -17 -7 -2 0.27 0.12
 -17 7 -3 0 0.11
 -17 7 -3 -0.08 0.08
 -17 -7 -3 0.06 0.09
 -17 7 -4 0.44 0.11
 -17 7 -4 0.33 0.17
 17 -7 4 0.28 0.16
 -17 -8 4 1.25 0.15
 17 -8 -4 1.9 0.23
 17 -8 -4 1.67 0.18
 -17 -8 3 0.36 0.11
 17 -8 -3 0.22 0.16
 -17 8 2 0.61 0.19
 -17 -8 2 0.91 0.15
 -17 8 1 0.23 0.1
 -17 8 1 0.3 0.19
 -17 -8 1 0.07 0.1
 -17 8 0 0.64 0.21
 -17 8 0 0.8 0.14
 -17 -8 0 0.48 0.13
 -17 8 -1 2.05 0.2
 -17 8 -1 1.72 0.29
 -17 -8 -1 1.27 0.18
 -17 8 -2 -0.04 0.07
 -17 8 -2 0.32 0.18
 -17 -8 -2 -0.18 0.09
 -17 8 -3 0.23 0.16
 -17 8 -3 0.28 0.1
 -17 -8 -3 0.2 0.08
 17 -9 -2 0.98 0.19
 -17 -9 2 0.38 0.11
 -17 9 1 0.55 0.12
 -17 9 1 0.42 0.15
 -17 -9 1 0.54 0.13
 -17 9 0 0.27 0.14
 -17 9 0 0.35 0.1
 -17 -9 0 0 0.09
 -17 9 -1 1.81 0.17
 -17 -9 -1 1.11 0.15
 -18 0 6 2.43 0.18
 18 0 -5 -0.15 0.07
 -18 0 5 0.26 0.35
 -18 0 4 12.87 1.15
 18 0 -4 14.27 0.8
 -18 0 3 0.61 0.41
 18 0 -3 0.1 0.14
 18 0 -3 -0.05 0.1
 18 0 -2 0.03 0.16
 18 0 -2 0.05 0.14
 -18 0 2 0.6 0.38
 18 0 -1 -0.04 0.17
 18 0 -1 0.14 0.13
 18 0 -1 -0.03 0.11
 18 0 0 28.4 1.52
 18 0 0 29.62 1.3
 18 0 0 28.5 1.46
 18 0 1 -0.01 0.12
 18 0 1 0.06 0.14
 18 0 1 0 0.11
 18 0 2 3.43 0.43
 18 0 2 3.45 0.35
 18 0 2 4.25 0.3
 18 0 3 -0.04 0.1
 -18 0 -3 0.21 0.21
 18 0 3 0.09 0.12
 18 0 3 -0.1 0.17
 -18 0 -4 4.57 0.51
 18 0 4 5.41 0.41
 18 0 4 6.18 0.48
 -18 0 -5 0.3 0.19
 18 0 5 0.16 0.17
 18 0 5 -0.15 0.08
 -18 0 -6 3.21 0.34
 18 0 6 2.78 0.27
 18 -1 -6 0.04 0.09
 -18 1 5 0.47 0.07
 18 1 -5 0.44 0.11
 -18 1 5 0.81 0.38
 18 -1 -5 0.69 0.18
 -18 -1 5 0.12 0.22
 -18 1 4 1.17 0.4
 18 1 -4 2.27 0.26
 18 -1 -4 2.39 0.31
 -18 -1 4 1.47 0.47
 18 -1 -4 1.87 0.21
 18 1 -3 0.67 0.16
 -18 1 3 0.64 0.38
 -18 -1 3 1.18 0.46
 18 -1 -3 0.76 0.19
 18 -1 -3 0.35 0.19
 -18 1 2 4.55 0.76
 18 1 -2 6.09 0.49
 18 1 -2 5.97 0.37
 18 -1 -2 5.8 0.39
 18 -1 -2 6.65 0.5
 -18 -1 2 7.03 0.89
 18 -1 -2 6.87 0.59
 18 1 -1 1.63 0.21
 18 1 -1 1.97 0.29
 -18 -1 1 0.51 0.42
 18 -1 -1 1.26 0.26
 18 -1 -1 1.12 0.19
 18 -1 -1 0.85 0.22
 18 1 0 7.53 0.49
 18 1 0 7.78 0.57
 18 -1 0 7.8 0.57
 18 -1 0 7.53 0.47
 18 -1 0 7.87 0.68
 18 1 1 -0.04 0.16
 18 1 1 0.05 0.12
 18 -1 1 0.01 0.13
 18 -1 1 -0.06 0.12
 -18 1 -2 2.19 0.38
 18 1 2 1.95 0.31
 18 1 2 1.97 0.24
 18 -1 2 2.2 0.26
 18 -1 2 2.03 0.29
 18 1 3 2.69 0.33
 -18 1 -3 1.93 0.34
 18 1 3 2.33 0.24
 -18 -1 -3 2.64 0.41
 18 -1 3 2.02 0.25
 18 -1 3 2.54 0.31
 18 1 4 0.15 0.1
 18 1 4 0.24 0.15
 -18 1 -4 0.13 0.19
 18 -1 4 0.34 0.13
 -18 -1 -4 0.41 0.22
 18 -1 4 0.44 0.17
 -18 1 -5 2.71 0.35
 18 1 5 2.13 0.26
 18 -1 5 2.62 0.25
 18 -1 5 2.73 0.32
 18 -1 5 1.92 0.17
 -18 -1 -5 2.29 0.33
 18 1 6 0.13 0.09
 -18 1 -6 0.16 0.15
 -18 -1 -6 0.5 0.18
 18 -1 6 0.07 0.09
 18 -1 6 0.24 0.15
 18 -2 -6 0.96 0.15
 -18 2 5 -0.14 0.21
 18 -2 -5 0.25 0.1
 -18 -2 5 0.28 0.32
 18 -2 -5 0.52 0.17
 18 2 -4 1.44 0.16
 -18 2 4 1.37 0.45
 -18 -2 4 1.17 0.45
 18 -2 -4 2.37 0.26
 18 -2 -4 2.3 0.32
 -18 2 3 0.24 0.39
 18 2 -3 0.67 0.14
 18 -2 -3 0.83 0.2
 -18 -2 3 0.53 0.4
 18 -2 -3 0.88 0.15
 18 2 -2 0.42 0.14
 18 -2 -2 0.25 0.13
 18 -2 -2 0.24 0.16
 -18 -2 2 0.18 0.26
 18 2 -1 0.12 0.15
 18 -2 -1 0.04 0.16
 -18 -2 1 0.17 0.39
 18 -2 -1 0.22 0.18
 18 2 0 1.3 0.23
 18 -2 0 1.45 0.27
 18 -2 0 1.38 0.22
 18 2 1 7.53 0.41
 18 2 1 8.86 0.57
 18 -2 1 7.71 0.59
 18 -2 1 7.67 0.53
 18 2 2 0.41 0.16
 -18 2 -2 0.69 0.25
 18 -2 2 0.68 0.2
 18 -2 2 0.17 0.19
 18 2 3 -0.04 0.12
 -18 2 -3 0.14 0.19
 18 -2 3 0.01 0.14
 18 -2 3 0.05 0.15
 -18 2 -4 0.14 0.19
 18 2 4 0.26 0.13
 -18 -2 -4 0.11 0.21
 18 -2 4 0.4 0.15
 18 -2 4 0.19 0.13
 -18 2 -5 0.54 0.16
 18 2 5 0.4 0.13
 18 -2 5 0.96 0.16
 18 -2 5 0.4 0.12
 -18 -2 -5 0.5 0.21
 18 2 6 0.3 0.08
 -18 2 -6 0.13 0.18
 -18 -2 -6 0.53 0.19
 18 -2 6 0.3 0.11
 18 -3 -6 0.13 0.1
 18 -3 -5 0.34 0.12
 18 -3 -5 0.54 0.18
 -18 3 4 0.22 0.36
 18 -3 -4 0.36 0.11
 18 -3 -4 0.56 0.16
 -18 -3 4 0.75 0.31
 18 -3 -4 0.27 0.15
 -18 3 3 0.55 0.41
 -18 -3 3 0.67 0.37
 18 -3 -3 0.99 0.23
 -18 -3 3 0.59 0.11
 -18 -3 3 0.59 0.11
 18 -3 -3 1.05 0.18
 18 3 -2 3.96 0.29
 -18 -3 2 4.61 0.74
 18 -3 -2 4.24 0.43
 18 -3 -2 4.66 0.38
 -18 -3 2 4.06 0.27
 18 3 -1 0.07 0.11
 -18 -3 1 0 0.38
 18 -3 -1 0.03 0.13
 -18 -3 1 0.23 0.1
 18 -3 -1 0.19 0.18
 18 3 0 0.12 0.1
 18 -3 0 -0.09 0.17
 18 -3 0 -0.02 0.18
 -18 3 -1 2.13 0.37
 18 3 1 1.98 0.25
 18 -3 1 2.74 0.36
 18 -3 1 2.81 0.32
 -18 3 -2 4.29 0.52
 18 3 2 5.08 0.37
 18 -3 2 4.34 0.45
 18 -3 2 4.57 0.4
 18 3 3 0.88 0.16
 -18 3 -3 0.97 0.23
 18 -3 3 1 0.23
 18 -3 3 1.28 0.2
 -18 3 -4 0.74 0.23
 18 3 4 0.81 0.14
 -18 -3 -4 0.89 0.25
 18 -3 4 0.91 0.21
 18 -3 4 0.92 0.17
 -18 3 -5 0.15 0.16
 18 3 5 -0.04 0.06
 -18 -3 -5 -0.07 0.15
 18 -3 5 -0.14 0.11
 18 -3 5 0.03 0.1
 18 -4 -6 1.07 0.17
 18 -4 -5 0.11 0.11
 18 -4 -5 0.17 0.16
 -18 4 4 0.38 0.39
 -18 -4 4 0.18 0.1
 -18 -4 4 0.53 0.35
 18 -4 -4 0.36 0.13
 18 -4 -4 0.57 0.16
 18 -4 -3 0.05 0.12
 18 -4 -3 -0.03 0.13
 -18 -4 3 -0.2 0.3
 -18 -4 3 0.07 0.1
 -18 -4 2 -0.27 0.32
 18 -4 -2 0.1 0.12
 18 -4 -2 -0.09 0.16
 -18 -4 2 0.06 0.1
 18 -4 -1 0.54 0.16
 18 -4 -1 0.22 0.19
 -18 -4 1 -0.13 0.34
 -18 -4 1 0.32 0.12
 18 -4 0 1.43 0.28
 18 -4 0 1.53 0.26
 -18 -4 0 1.1 0.15
 18 4 1 0.13 0.07
 -18 4 -1 0.03 0.14
 18 -4 1 0.18 0.2
 -18 -4 -1 0.13 0.08
 18 -4 1 0.14 0.15
 -18 4 -2 0.46 0.22
 18 4 2 0.31 0.08
 18 -4 2 0.65 0.18
 18 -4 2 0.4 0.24
 -18 4 -3 -0.12 0.17
 18 -4 3 0.17 0.16
 18 -4 3 0.06 0.17
 -18 4 -4 0.43 0.14
 18 -4 4 0.56 0.15
 18 -4 4 0.37 0.17
 -18 -4 -4 0.53 0.21
 -18 4 -5 1.35 0.24
 18 -4 5 1.32 0.18
 -18 -4 -5 1.23 0.24
 18 -4 5 1.88 0.23
 18 -5 -5 0.25 0.1
 18 -5 -5 0.28 0.08
 -18 -5 4 4.18 0.27
 18 -5 -4 3.94 0.3
 18 -5 -4 3.74 0.35
 -18 -5 4 4.23 0.27
 18 -5 -3 0.06 0.11
 -18 -5 3 -0.05 0.09
 -18 -5 3 -0.37 0.32
 18 -5 -3 0.08 0.16
 -18 -5 2 1.7 0.2
 18 -5 -2 1.59 0.28
 18 -5 -2 1.73 0.24
 -18 -5 2 1.18 0.36
 -18 -5 1 -0.66 0.32
 -18 -5 1 -0.02 0.09
 18 -5 -1 0.2 0.18
 18 -5 -1 0.1 0.19
 -18 5 0 2.58 0.37
 18 -5 0 2.97 0.32
 -18 -5 0 2.24 0.23
 -18 -5 0 1.82 0.53
 -18 5 -1 0.25 0.2
 18 -5 1 0.27 0.17
 -18 -5 -1 0.05 0.09
 -18 5 -2 0.13 0.13
 18 -5 2 0.4 0.17
 -18 5 -3 0.02 0.16
 18 -5 3 0.11 0.13
 -18 5 -4 -0.01 0.15
 18 -5 4 0.22 0.18
 18 -5 4 0.11 0.12
 18 -5 5 0.17 0.11
 18 -5 5 -0.14 0.1
 18 -6 -4 1.46 0.18
 18 -6 -4 1.92 0.24
 -18 -6 4 1.52 0.15
 18 -6 -3 -0.21 0.13
 -18 -6 3 0.18 0.1
 18 -6 -3 0.12 0.16
 18 -6 -2 0.01 0.13
 -18 -6 2 -0.02 0.08
 -18 -6 2 0.16 0.24
 18 -6 -2 0.04 0.18
 -18 -6 1 4.06 0.66
 -18 -6 1 2.89 0.26
 18 -6 -1 4.06 0.35
 -18 6 0 0.26 0.19
 -18 -6 0 0.18 0.11
 18 -6 0 0.46 0.17
 -18 6 -1 0.76 0.23
 -18 -6 -1 0.93 0.15
 18 -6 1 1.35 0.23
 -18 6 -2 0.2 0.14
 -18 -6 -2 0.18 0.08
 18 -6 2 0.36 0.19
 -18 6 -3 -0.11 0.14
 18 -6 3 0.11 0.16
 -18 6 -4 0.18 0.15
 18 -6 4 0.35 0.12
 -18 -7 3 0.4 0.1
 18 -7 -3 0.46 0.13
 18 -7 -3 0.53 0.18
 -18 -7 2 -0.01 0.08
 18 -7 -2 -0.01 0.12
 -18 7 1 0.24 0.18
 -18 -7 1 0.08 0.1
 18 -7 -1 0.21 0.14
 -18 7 0 0.44 0.18
 18 -7 0 0.4 0.17
 -18 -7 0 0.11 0.1
 -18 7 -1 -0.05 0.15
 -18 -7 -1 0.03 0.08
 18 -7 1 0.04 0.14
 -18 7 -2 0.04 0.15
 18 -7 2 -0.14 0.12
 -18 -7 -2 -0.03 0.07
 -18 7 -3 0.01 0.15
 18 -7 3 0.29 0.13
 18 -8 -2 0.48 0.14
 -18 -8 2 0.65 0.12
 -18 8 1 0.35 0.16
 18 -8 -1 0.52 0.15
 -18 -8 1 0.22 0.1
 -18 8 0 0.32 0.17
 -18 8 0 0.72 0.13
 18 -8 0 0.4 0.16
 -18 -8 0 0.49 0.11
 -18 8 -1 0.2 0.15
 -18 8 -1 0.09 0.1
 -18 -8 -1 0.08 0.07
 18 -8 1 0.1 0.12
 19 0 -5 -0.04 0.08
 -19 0 4 1.3 0.44
 19 0 -4 1.24 0.19
 -19 0 3 0.01 0.31
 19 0 -3 -0.13 0.11
 19 0 -2 0.22 0.12
 -19 0 2 -0.04 0.34
 19 0 -2 0.02 0.13
 19 0 -1 0.03 0.14
 19 0 -1 0.12 0.12
 19 0 0 0.35 0.14
 19 0 0 0.37 0.18
 19 0 1 0.1 0.16
 19 0 1 0.22 0.14
 19 0 2 1.15 0.17
 19 0 2 0.96 0.24
 19 0 3 0.32 0.17
 -19 0 -3 -0.26 0.14
 19 0 3 0.18 0.11
 19 0 4 0.28 0.17
 19 0 4 0.2 0.09
 -19 0 -4 0.28 0.18
 -19 0 -5 -0.03 0.1
 19 0 5 0.13 0.1
 19 -1 -5 0.9 0.15
 19 1 -4 1.88 0.19
 -19 1 4 1.31 0.43
 -19 -1 4 2.58 0.53
 19 -1 -4 2.18 0.26
 19 1 -3 0.72 0.15
 -19 1 3 0.9 0.45
 19 -1 -3 0.97 0.17
 19 -1 -3 0.87 0.2
 -19 -1 3 0.75 0.39
 19 1 -2 -0.09 0.12
 19 -1 -2 0.27 0.18
 -19 -1 2 -0.19 0.33
 19 -1 -2 -0.09 0.1
 19 1 -1 0.21 0.14
 19 -1 -1 0.05 0.1
 19 -1 -1 0.04 0.16
 19 -1 -1 -0.04 0.1
 19 1 0 5.8 0.47
 19 1 0 6.06 0.36
 19 -1 0 7.13 0.49
 19 -1 0 6.03 0.37
 19 -1 0 6.3 0.5
 19 1 1 1.19 0.23
 19 1 1 1.18 0.15
 19 -1 1 1.31 0.19
 19 -1 1 1.1 0.21
 19 -1 1 0.96 0.26
 19 1 2 11.45 0.59
 19 1 2 11.53 0.71
 -19 1 -2 10.16 0.8
 19 -1 2 10.93 0.75
 19 -1 2 12.16 0.58
 19 -1 2 11.87 0.7
 19 1 3 0.16 0.08
 -19 1 -3 0.35 0.2
 19 1 3 0.35 0.14
 19 -1 3 0.35 0.2
 19 -1 3 0.42 0.13
 19 -1 3 0.23 0.1
 -19 -1 -3 0.59 0.22
 19 1 4 8.27 0.52
 -19 1 -4 7.89 0.62
 -19 -1 -4 7.78 0.61
 19 -1 4 8.57 0.49
 19 -1 4 8.49 0.57
 19 1 5 0.23 0.1
 -19 1 -5 -0.05 0.15
 19 -1 5 -0.01 0.07
 19 -1 5 -0.17 0.1
 -19 -1 -5 0.05 0.14
 19 -2 -5 0.97 0.17
 19 -2 -4 0.04 0.08
 19 -2 -4 -0.21 0.14
 -19 2 3 -0.39 0.31
 19 2 -3 0.04 0.08
 19 -2 -3 -0.15 0.14
 -19 -2 3 -0.49 0.3
 19 -2 -3 0.23 0.11
 19 2 -2 0.11 0.11
 19 -2 -2 0.39 0.17
 19 -2 -2 0.16 0.13
 -19 -2 2 0.2 0.27
 19 -2 -2 0.22 0.13
 19 2 -1 0.73 0.16
 19 -2 -1 0.57 0.19
 19 -2 -1 0.63 0.16
 19 2 0 0.52 0.15
 19 -2 0 0.55 0.16
 19 -2 0 0.77 0.2
 19 2 1 -0.1 0.1
 19 -2 1 0.02 0.13
 19 -2 1 -0.04 0.11
 -19 2 -2 1.76 0.31
 19 2 2 1.12 0.19
 19 -2 2 1.46 0.19
 19 -2 2 1.57 0.23
 19 2 3 0.09 0.1
 -19 2 -3 0.61 0.22
 19 -2 3 0.09 0.13
 19 -2 3 0.24 0.1
 -19 2 -4 1.05 0.2
 19 2 4 1.03 0.15
 19 -2 4 0.99 0.16
 19 -2 4 0.84 0.12
 -19 -2 -4 1.01 0.21
 19 2 5 0.5 0.08
 -19 2 -5 0.59 0.18
 -19 -2 -5 0.67 0.18
 19 -2 5 0.36 0.11
 19 -3 -5 0.17 0.15
 19 -3 -4 0 0.15
 19 -3 -4 0.13 0.11
 19 -3 -3 -0.14 0.17
 -19 -3 3 -0.55 0.3
 19 -3 -3 0.03 0.12
 19 -3 -3 0.07 0.1
 19 -3 -2 1.77 0.26
 -19 -3 2 1.38 0.44
 19 -3 -2 1.39 0.19
 19 3 -1 0.29 0.09
 19 -3 -1 0.42 0.13
 19 -3 -1 0.01 0.15
 -19 -3 1 0.69 0.42
 19 3 0 9.57 0.54
 19 -3 0 10.81 0.67
 19 -3 0 10.51 0.59
 -19 3 -1 0.26 0.2
 19 3 1 0.5 0.12
 19 -3 1 0.42 0.17
 19 -3 1 0.55 0.16
 -19 3 -2 0.22 0.2
 19 3 2 0.13 0.09
 19 -3 2 0.39 0.15
 19 -3 2 0.43 0.17
 -19 3 -3 0.62 0.2
 19 3 3 0.17 0.08
 19 -3 3 0.33 0.12
 19 -3 3 0.71 0.18
 -19 3 -4 0.04 0.15
 19 -3 4 -0.05 0.09
 19 -3 4 0.02 0.1
 -19 -3 -4 -0.05 0.15
 19 -4 -4 0.27 0.12
 19 -4 -4 0.31 0.09
 19 -4 -4 0.29 0.17
 19 -4 -3 0.35 0.12
 19 -4 -3 0.45 0.16
 -19 -4 2 -0.1 0.34
 19 -4 -2 -0.07 0.11
 19 -4 -2 0.38 0.17
 19 -4 -1 1.26 0.24
 19 -4 -1 0.6 0.15
 -19 -4 1 0.77 0.41
 19 -4 0 0.34 0.17
 19 -4 0 0.47 0.16
 -19 4 -1 -0.15 0.08
 19 -4 1 -0.11 0.1
 19 -4 1 -0.03 0.15
 -19 4 -2 0.15 0.17
 19 -4 2 0.36 0.16
 19 -4 2 0.34 0.15
 -19 4 -3 0.03 0.15
 19 -4 3 0.17 0.17
 19 -4 3 0.13 0.11
 -19 4 -4 0.11 0.14
 19 -4 4 0.24 0.15
 19 -4 4 0.18 0.1
 19 -5 -4 0.51 0.09
 19 -5 -4 0.54 0.14
 19 -5 -3 4.93 0.39
 19 -5 -2 0.07 0.09
 19 -5 -2 -0.08 0.14
 19 -5 -1 0.19 0.17
 19 -5 -1 0.3 0.13
 -19 5 0 0.03 0.16
 19 -5 0 0.27 0.17
 19 -5 0 0.26 0.13
 -19 5 -1 -0.03 0.15
 19 -5 1 -0.04 0.12
 19 -5 1 -0.14 0.15
 -19 5 -2 -0.12 0.13
 19 -5 2 0.12 0.11
 19 -5 2 0.13 0.15
 -19 5 -3 -0.05 0.13
 19 -5 3 0.05 0.1
 19 -5 3 0.32 0.14
 19 -6 -3 0.05 0.15
 19 -6 -3 0.12 0.1
 19 -6 -2 0.22 0.13
 -19 -6 2 0.28 0.08
 19 -6 -2 0.41 0.16
 -19 -6 1 0.11 0.07
 19 -6 -1 0.19 0.11
 19 -6 -1 0.2 0.17
 -19 6 0 -0.05 0.14
 19 -6 0 0.25 0.21
 19 -6 0 0.54 0.14
 19 -6 1 1.95 0.23
 19 -6 1 2.35 0.28
 19 -6 2 1.41 0.2
 19 -6 2 1.48 0.24
 19 -7 -1 1.01 0.24
 19 -7 -1 0.91 0.15
 -19 7 0 -0.12 0.12
 19 -7 0 -0.09 0.1
 -19 7 -1 0.35 0.15
 19 -7 1 0.21 0.13
 20 0 -4 0.18 0.08
 20 0 -3 0.19 0.12
 20 0 -2 -0.03 0.13
 20 0 -1 -0.05 0.11
 20 0 0 3.9 0.27
 20 0 0 3.58 0.36
 20 0 1 -0.14 0.15
 20 0 1 0.08 0.1
 20 0 2 16.5 0.78
 20 0 2 15.61 0.88
 -20 0 -3 -0.16 0.09
 20 0 3 0.14 0.11
 20 0 4 4.3 0.31
 -20 0 -4 2.99 0.33
 20 -1 -4 0.98 0.17
 20 -1 -3 1.74 0.23
 20 1 -2 0.21 0.11
 20 -1 -2 0.11 0.1
 20 -1 -2 0.05 0.13
 20 1 -1 -0.17 0.09
 20 -1 -1 0.07 0.1
 20 -1 -1 -0.17 0.12
 20 1 0 0.38 0.14
 20 -1 0 0.56 0.16
 20 -1 0 0.58 0.2
 20 1 1 1.09 0.19
 20 -1 1 1.37 0.19
 20 -1 1 1.3 0.23
 20 1 2 1.85 0.23
 -20 1 -2 2.12 0.3
 20 -1 2 1.53 0.2
 20 -1 2 1.99 0.28
 -20 1 -3 0.06 0.15
 20 1 3 0.03 0.09
 -20 -1 -3 0.06 0.16
 20 -1 3 -0.06 0.1
 20 -1 3 0.2 0.14
 20 1 4 7.73 0.43
 -20 1 -4 7.46 0.54
 20 -1 4 7.11 0.38
 20 -1 4 8.65 0.51
 -20 -1 -4 8.04 0.55
 20 -2 -4 0.8 0.15
 20 -2 -3 1.67 0.17
 20 -2 -3 2.16 0.27
 20 2 -2 0.04 0.06
 20 -2 -2 -0.17 0.13
 20 -2 -2 -0.02 0.09
 20 2 -1 0.08 0.08
 20 -2 -1 0.22 0.13
 20 -2 -1 0 0.17
 20 2 0 0.36 0.11
 20 -2 0 0.16 0.1
 20 -2 0 0.64 0.15
 20 -2 0 0.65 0.2
 20 2 1 0.67 0.14
 20 -2 1 0.67 0.13
 20 -2 1 0.69 0.16
 20 2 2 0.12 0.09
 -20 2 -2 0.18 0.16
 20 -2 2 0.24 0.2
 20 -2 2 0.11 0.1
 20 -2 2 0.16 0.09
 -20 2 -3 0.22 0.16
 20 2 3 0.07 0.07
 20 -2 3 0.41 0.17
 20 -2 3 0.04 0.08
 -20 2 -4 0.65 0.17
 20 -3 -4 2.32 0.25
 20 -3 -3 0.68 0.13
 20 -3 -3 0.83 0.17
 20 -3 -2 0.64 0.2
 20 -3 -2 0.57 0.17
 20 -3 -1 0.61 0.18
 20 -3 -1 0.79 0.13
 20 -3 0 0.67 0.14
 20 -3 0 0.69 0.17
 -20 3 -1 -0.03 0.15
 20 -3 1 0.3 0.13
 20 -3 1 0.1 0.1
 -20 3 -2 -0.03 0.13
 20 -3 2 0.26 0.1
 20 -3 2 0.22 0.14
 -20 3 -3 1.02 0.21
 20 -3 3 0.93 0.17
 20 -4 -3 0.19 0.1
 20 -4 -2 0.11 0.09
 20 -4 -2 0.05 0.11
 20 -4 -1 0.2 0.13
 20 -4 -1 0.53 0.12
 20 -4 0 0.49 0.17
 20 -4 0 0.56 0.14
 20 -4 1 2.12 0.25
 20 -4 1 2.04 0.22
 -20 4 -2 0.19 0.14
 20 -4 2 0.03 0.09
 20 -4 2 -0.12 0.1
 -20 4 -3 0.02 0.12
 20 -4 3 0.28 0.09
 20 -4 3 0.28 0.11
 20 -5 -2 4.12 0.34
 20 -5 -1 0.09 0.13
 20 -5 -1 0.07 0.08
 20 -5 0 0.3 0.16
 20 -5 0 0 0.1
 -20 5 -1 0.16 0.14
 20 -5 1 0.01 0.11
 20 -5 1 -0.11 0.11
 -20 5 -2 0.16 0.15
 20 -5 2 0.37 0.1
 20 -5 2 0.29 0.12
 21 0 -3 0.01 0.06
 21 0 -2 1.08 0.15
 21 0 -1 -0.04 0.08
 21 0 0 0.34 0.14
 21 0 1 -0.04 0.09
 21 0 2 1.14 0.17
 21 -1 -3 0.58 0.12
 21 -1 -2 0.14 0.09
 21 -1 -1 2.07 0.24
 21 1 0 2.03 0.19
 21 -1 0 1.63 0.23
 21 1 1 5.93 0.37
 21 -1 1 5.77 0.3
 21 -1 1 5.84 0.43
 21 1 2 0.4 0.11
 21 -1 2 0.52 0.15
 21 -2 -3 0.03 0.08
 21 -2 -2 0.32 0.15
 21 -2 -1 0.12 0.09
 21 -2 -1 0.23 0.15
 21 -2 0 1.56 0.26
 21 -2 0 1.55 0.16
 21 -2 1 4.07 0.28
 21 -2 1 4.05 0.37
 21 -3 -2 0.16 0.09
 21 -3 -1 -0.18 0.09
 21 -3 -1 0.21 0.14
 21 -3 0 0.32 0.12
 21 -3 1 0.84 0.14
